# Supplementary material for: Determinants of Electron Transport at Asymmetric Metal/Organic/Metal Contacts
Source: Research Square preprint supplement (doi:10.21203/rs.3.rs-7131370/v1), 2025-07-28
Supplement: Supplementary file 1 [file 97d12c02c1ff59a8c188ab51.docx]

**Supplementary Information**

**Determinants of Electron Transport at Asymmetric Metal/Organic/Metal Contacts**

Guirong Su,a Rulin Feng,b Yonghao Zhao,a Igor Ying Zhang,*,b and Wei Liu*,c

aCollege of Materials Science and Engineering, Hohai University, Changzhou 213200, China.

bResearch Center for Chemical Theory (RCCT), Shanghai Key Laboratory of Molecular Catalysis and Innovation Materials, Collaborative Innovation Centre of Chemistry for Energy Materials, MOE Laboratory for Computational Physical Science, Department of Chemistry, Fudan University, Shanghai, China.

cState Key Laboratory of Rare Earth Resource Utilization, Changchun Institute of Applied Chemistry, Chinese Academy of Sciences, Changchun 130022, Jilin, China.

*e-mail: igor_zhangying@fudan.edu.cn; weiliu@ciac.ac.cn

**Table of Contents**

**Section 1: Supplementary Figures.** 5

**Supplementary Fig. 1.** The molecular adsorption geometries of typical molecules on metal surfaces, along with their corresponding adsorption energies and adsorption heights. 5

**Supplementary Fig. 2.** The molecular electronic geometries of molecules on metal surfaces. 6

**Supplementary Fig. 3.** The energy level distribution of the LUMOs of organic molecules. 7

**Supplementary Fig. 4.** Interfacial current-voltage characteristic curve for various organic molecules adsorbed on the Ag(111) surface. 8

**Supplementary Fig. 5.** Analysis of key parameters in our descriptor. 9

**Supplementary Fig. 6.** Potential energy curve of *trans*-ADS on Cu(111) at the chemisorbed and physisorbed states. 10

**Supplementary Fig. 7.** Schematic diagram of the theoretical models for realizing the transition between the physisorbed and chemisorbed states in an integrated diode. 11

**Supplementary Fig. 8.** Side views of the models, employed for calculating the I-V characteristics of the physisorbed and chemisorbed systems with the tip at asymmetric sites. 12

**Supplementary Fig. 9.** The I-V curves for the physisorbed and chemisorbed systems of the *trans*-ADS/Cu(111) interface in contact with asymmetric tip sites. 13

**Supplementary Fig. 10.** The diagrams of the partial DOS of the molecule and the tip electrode in the physisorption and chemisorption of the *trans*-ADS/Cu(111) system. 14

**Supplementary Fig. 11.** The bond dipole of the physisorbed and chemisorbed systems with the tip at different positions. 15

**Supplementary Fig. 12.** The geometric structures employed to calculate the I-V characteristics of the *trans*-ADS/Cu(111) interface with asymmetric Ag, Au and Pt electrodes. 16

**Supplementary Fig. 13.** Computed transmission spectra of physisorption and chemisorption of *trans*-ADS/Cu(111) in contact with different electrodes at zero bias voltage. 17

**Supplementary Fig. 14.** First-principles simulation of transport properties for the physisorption and chemisorption of *trans*-ADS/Cu(111) with Ag, Au and Pt electrodes. 18

**Section 2: Supplementary Tables.** 19

**Supplementary Table 1.** The calculated work functions of different metal surfaces, changes in work functions induced by the adsorption of organic molecules, interfacial dipoles, molecular dipoles, and interfacial Schottky barriers.19

**Supplementary Table 2.** Calculated electron density of states of the physisorbed and chemisorbed states at the fermi energy for Cu/*trans*-ADS/Cu system with tip at distinct sites. 20

**Supplementary Table 3.** Calculated Schottky barrier height difference between the chemisorbed and physisorbed systems of *trans*-ADS/Cu interface with tip at distinct sites. 21

**Supplementary Table 4.** Calculated tunneling width difference between the physisorbed and chemisorbed states at asymmetric sites. 22

**Supplementary Table 5.** Calculated interfacial dipole difference between the physisorbed and chemisorbed states at asymmetric sites. 23

**Supplementary Table 6.** Calculated bond dipole and tunneling widthfor the physisorbed and chemisorbed states of *trans*-ADS/Cu(111) systems with Ag electrode. 24

**Supplementary Table 7.** Calculated bond dipole and tunneling width for the physisorbed and chemisorbed states of *trans*-ADS/Cu(111) systems with Au electrode. 25

**Supplementary Table 8.** Calculated bond dipole and tunneling width for the physisorbed and chemisorbed states of *trans*-ADS/Cu(111) systems with Pt electrode. 26

**Section 3: Supplementary archive entries of the total energies and atomic coordinates of all asymmetric structures employed for electrons transport calculations.** 27

**3.1** Totals energies of the Physisorption with 0.12 eV bias voltage applied, and Chemisorption with −0.12 eV applied.27

**3.2** The input files for transport calculations of the *trans*-ADS/Cu system with tip at asymmetric sites, which includes the atomic coordinates of the structural geometries and the input parameters. 29

**3.2.1** Cu/*trans*-ADS/Cu system29

**3.2.2** Cu/*trans*-ADS/Ag system281

**3.2.3** Cu/*trans*-ADS/Au system548

**3.2.4** Cu/*trans*-ADS/Pt system799


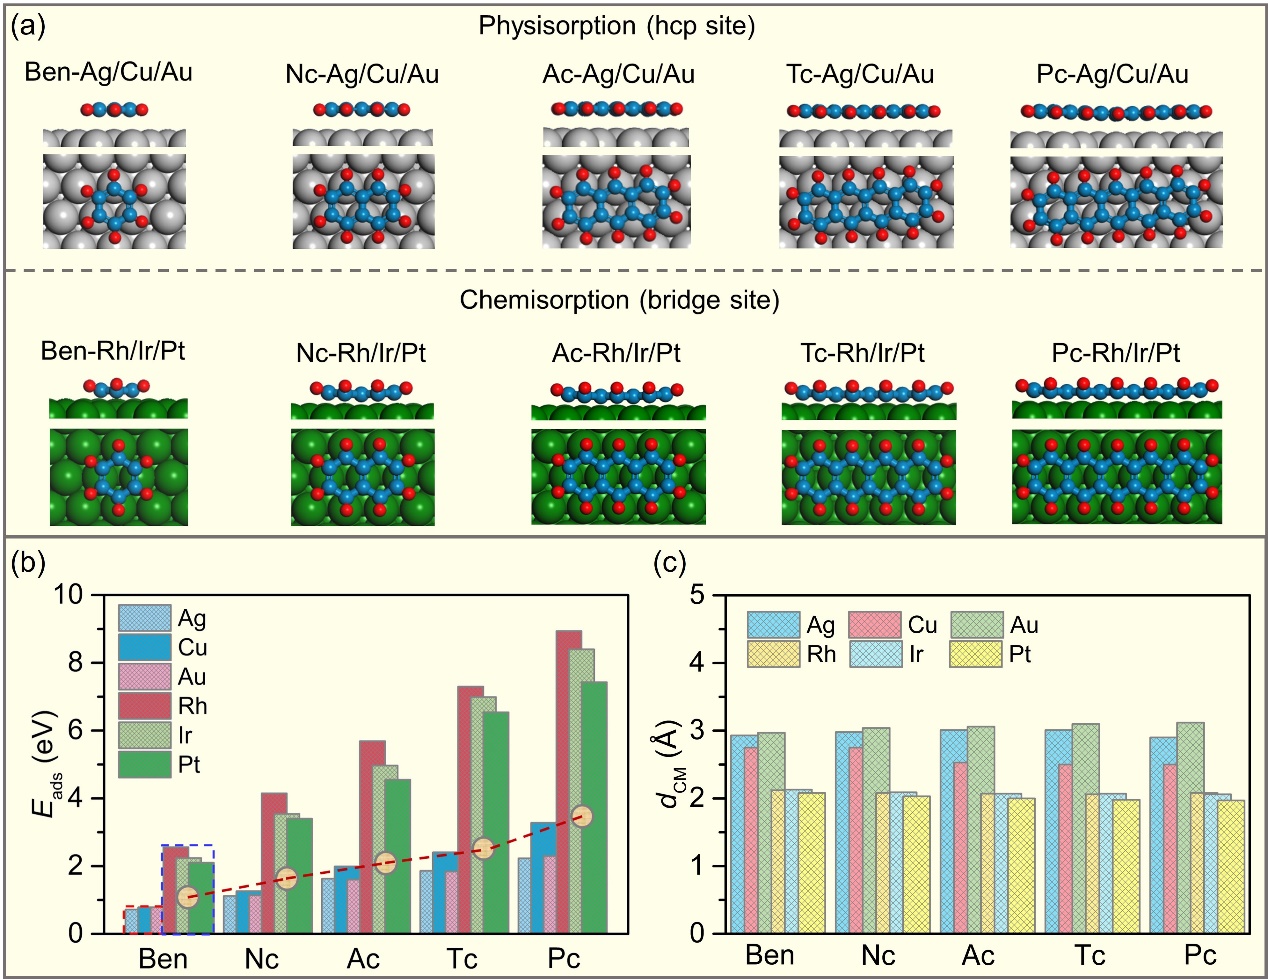


**Supplementary Fig. 1.** The molecular adsorption geometries of typical molecules on metal surfaces, along with their corresponding adsorption energies and adsorption heights. (a) Top and side views of organic molecules, including Ben, Nc, Ac, Tc and Pc, adsorbed on the (111) surfaces of Ag, Cu, Au, Rh, Ir, and Pt metals. For the physisorption, the molecules predominantly adsorb at the hcp sites, with their C–C bonds forming a 30° angle with adjacent metal bonds. Conversely, on the more reactive Pt(111) surface, the organic molecules undergo chemisorption at the bridge sites, leading to substantial molecular deformation. (b) The adsorption energies (*E*ads) of these organic molecules on different metal surfaces. The dashed line indicates a consistent upward trend in adsorption energy as the molecular size gradually increases. The average energy difference increases from 1.53 eV to 5.65 eV. (c) The average adsorption height of the organic molecules on different metal surfaces. These values are determined by measuring the distance from the average adsorption height of C atoms in the organic molecules to the first layer of metal atoms. The average adsorption height of the molecule on Pt(111), Rh(111), and Ir(111) ranges from 2.01 to 2.08 Å, which is considerably smaller than the height of 2.61 to 3.06 Å observed in the physisorption.


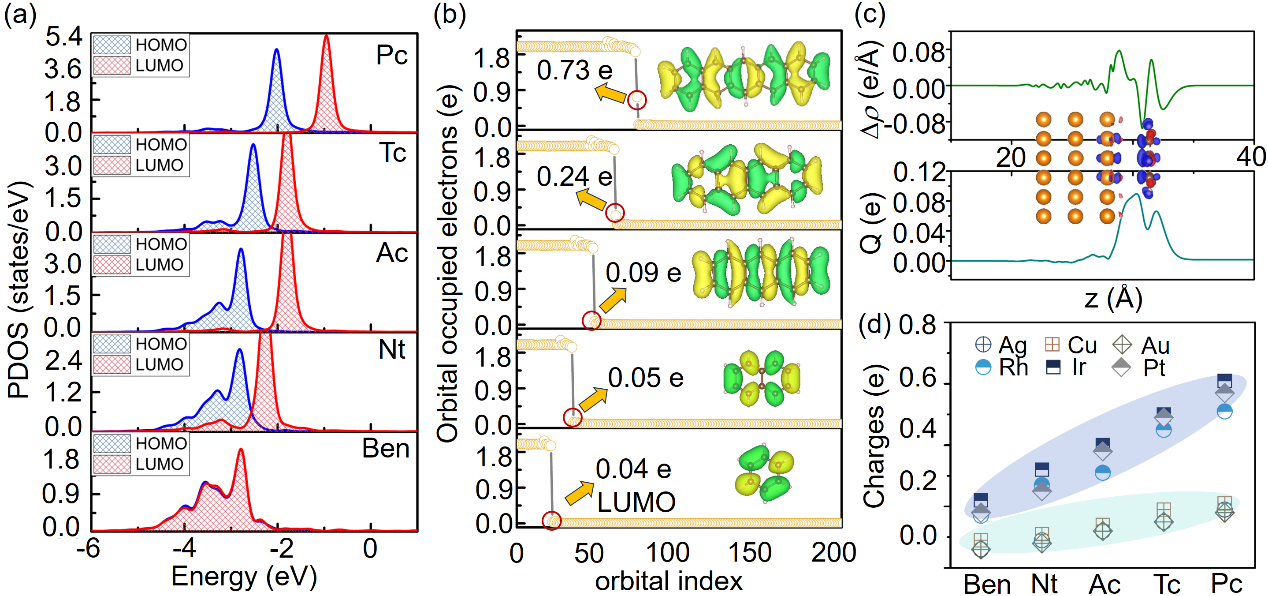


**Supplementary Fig. 2.** The molecular electronic geometries of molecules on metal surfaces. (a) The projected density of states (PDOS) obtained by projecting the density of states onto the highest occupied molecular orbital (HOMO) and lowest unoccupied molecular orbital (LUMO) of the free molecules within the Ben, Nt, Ac, Tc, Pc/Cu(111) systems. The energy zero point corresponds to the Fermi level. As molecular size increases, the widths of both the LUMO and HOMO orbitals broaden significantly, and their energy levels exhibit an upward trend. (b) Analysis of the molecular orbital populations for molecules adsorbed on Cu(111). These occupations were obtained by integrating the PDOS of the molecular orbitals (such as LUMO) up to the Fermi level. The red hollow circles correspond to the LUMO molecular orbitals after adsorption, with their orbital schematic shown in the inset. (c) Adsorption-induced electron density redistribution integrated over the *x*−*y* plane (Δ*ρ*, top) and the total charge transferred, (Q, bottom) for the Ben/Cu(111) systems as a function of *z* coordinate (perpendicular to the surface). There is a depletion of electron density in the vicinity of the Ben side between the adsorbate and the substrate, while an accumulation occurs in the region adjacent to the substrate side indicating a significant transfer of electrons from the molecule to the substrate. The electron density difference for Ben on Cu(111) at equilibrium distances is shown in the insets with the same isosurface (0.015 Å−3). (d) Total number of interfacial electrons transferred for molecules adsorbed on different surfaces. As the molecular size increases on the same metal surface, the interfacial interactions intensify, leading to a substantial increase in the number of electrons transferred from the molecule to the metal.


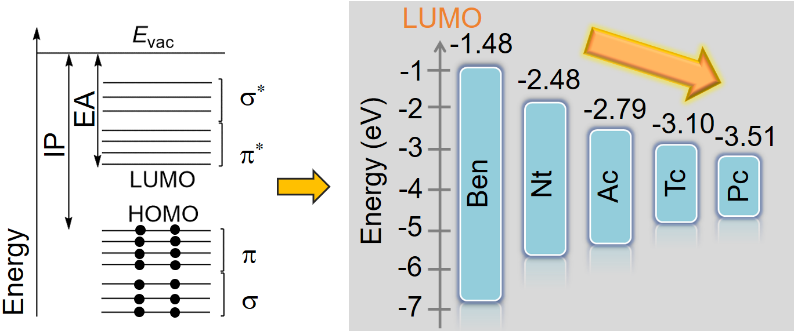


**Supplementary Fig. 3.** The energy level distribution of the LUMOs of organic molecules. Left: A conjugated molecule features electronic structure comprising filled π and σ orbitals, as well as unfilled π* and σ* orbitals. The energy levels of the frontier orbitals, specifically the highest occupied molecular orbital (HOMO) and lowest unoccupied molecular orbital (LUMO), determine the ionization potential (IP) and electron affinity (EA), respectively. Right: Calculated energy level diagrams of these organic molecules in gas, which exhibits a noticeable downward trend for the LUMO orbital.


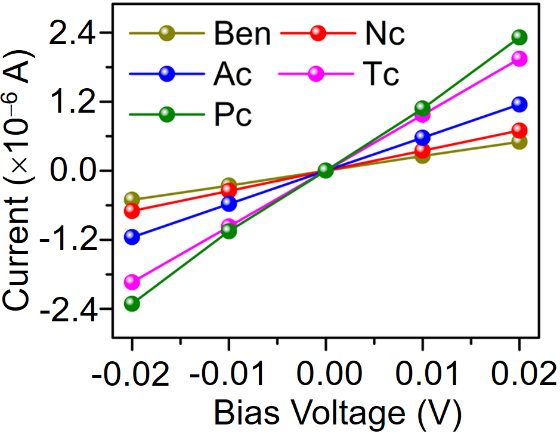


**Supplementary Fig. 4.** Interfacial current-voltage characteristic curve for various organic molecules adsorbed on the Ag(111) surface.


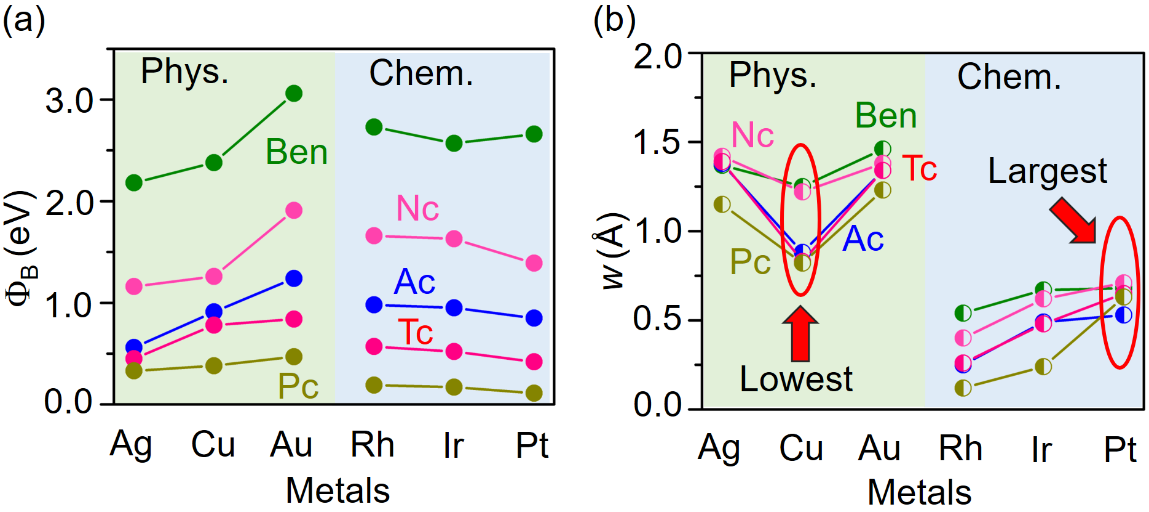


**Supplementary Fig. 5.** Analysis of key parameters in our descriptor. (a) Schottky barriers in both physisorbed and chemisorbed systems. (b) Tunneling width variations in physisorbed versus chemisorbed systems. Notably, the tunneling width reaches its minimum in the system where molecules are physically adsorbed on the Cu(111) surface, whereas it attains its maximum for the Pt(111) surface under conditions of chemisorption.


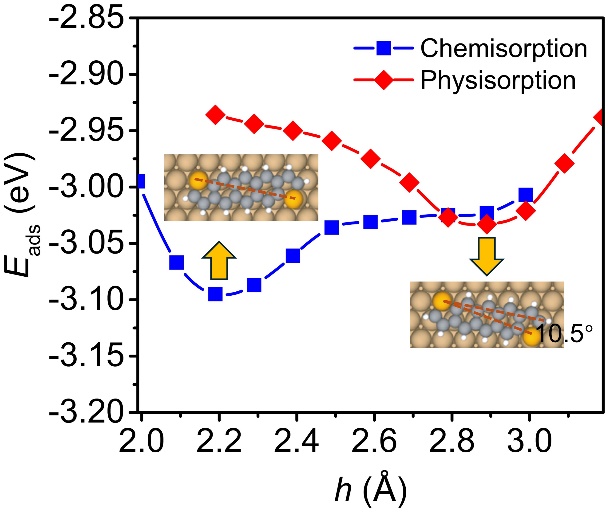


**Supplementary Fig. 6.** Potential energy curve of *trans*-ADS on Cu(111) at the chemisorbed and physisorbed states. Our calculations revealed two minima at 2.20 and 2.90 Å, with corresponding structural models depicted in the insets. Specifically, the molecule exhibits a dumbbell-shaped chemisorbed state and a flat-shaped physisorbed state, differing by a rotation of 10.5°. Additionally, by comparing the adsorption energies of configurations resulting from different rotational or positional shifts of the molecules, we observed a preference for physisorption above an adsorption height of 2.80 Å. Conversely, below 2.80 Å, the molecule adopts the orientation of a chemisorbed state. Hence, during geometry relaxations at adsorption heights exceeding 2.80 Å, a 10.5° rotational transition occurs from the chemisorbed to the physisorbed state position.


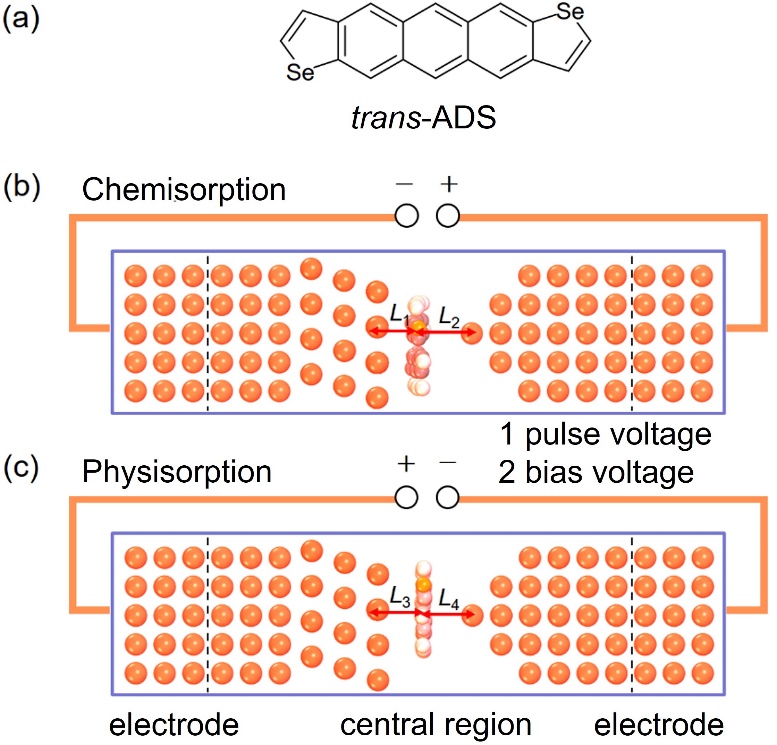


**Supplementary Fig. 7.** (a) Chemical structures of *trans*-isomer of anthradiselenophene (ADS) molecule. (b) and (c) Schematic diagram of the theoretical models for realizing the transition between the physisorbed and chemisorbed states in an integrated diode. This transition can be realized *via* adding a pulse voltage between the right electrode and substrate surface (step 1). Then, a constant bias voltage is applied for the working current (step 2). The distance between the metal substrate and STM tip is fixed to be twice of the equilibrium distance in the physisorption, *i.e.*, *L*3=*L*4, which leads to a much lower *L*1 comparing with *L*2 in the chemisorbed system.


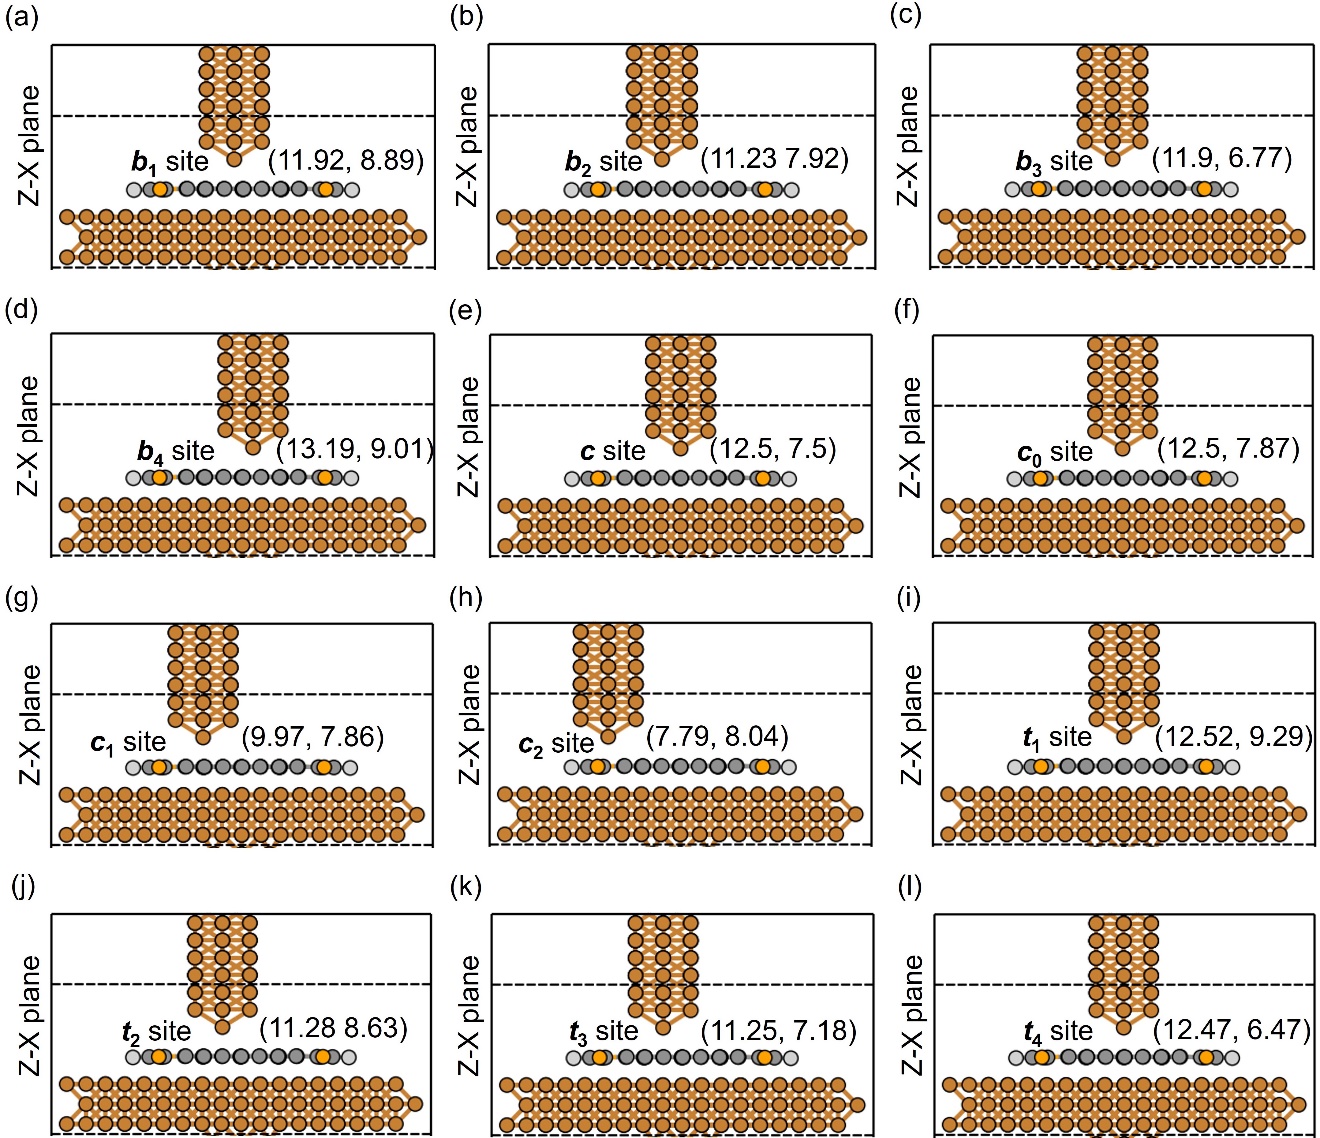


**Supplementary Fig. 8.** Side views of the models, employed for calculating the I-V characteristics of the physisorbed and chemisorbed systems with the tip at asymmetric sites. The Cartesian coordinates of the tip atom of the probe along the x-y axes in these asymmetric system models are also indicated. And the z-coordinate of the atom remains universal for all models (in our calculations, z = 18.42 Å).


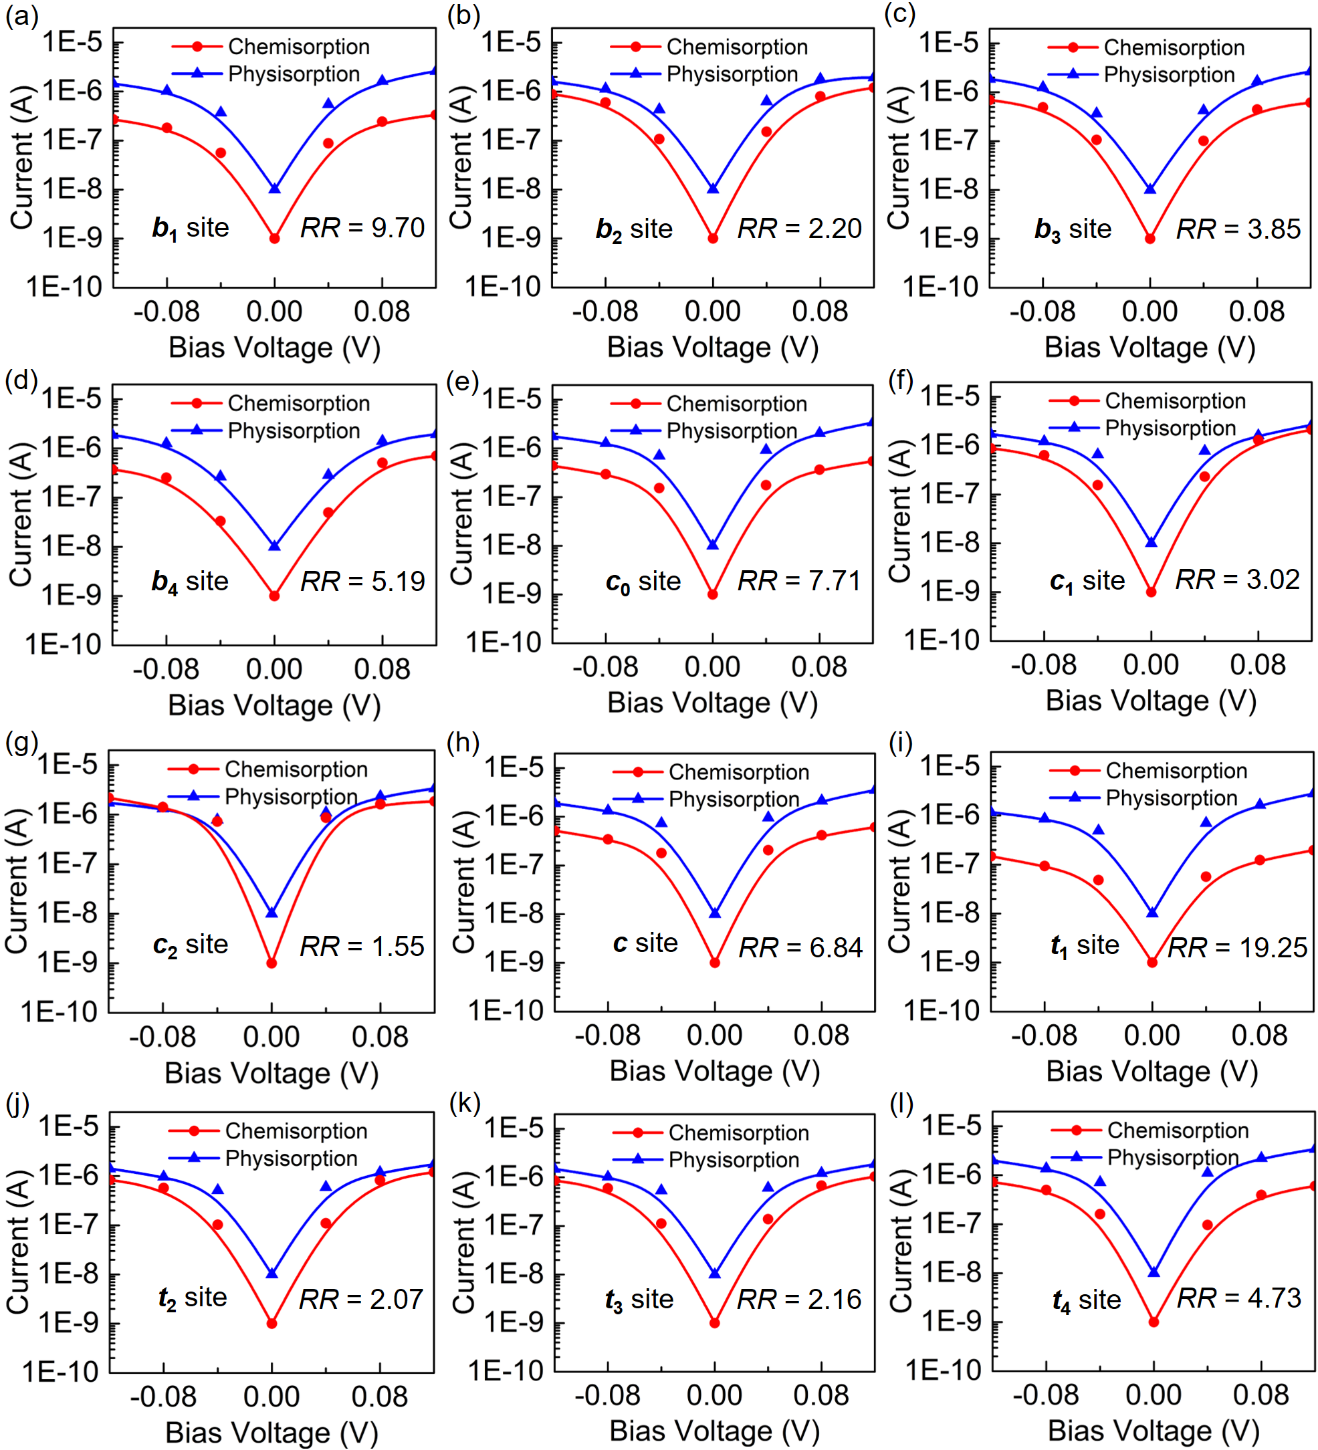


**Supplementary Fig. 9.** The I-V curves for the physisorbed and chemisorbed systems of the *trans*-ADS/Cu(111) interface in contact with asymmetric tip sites.


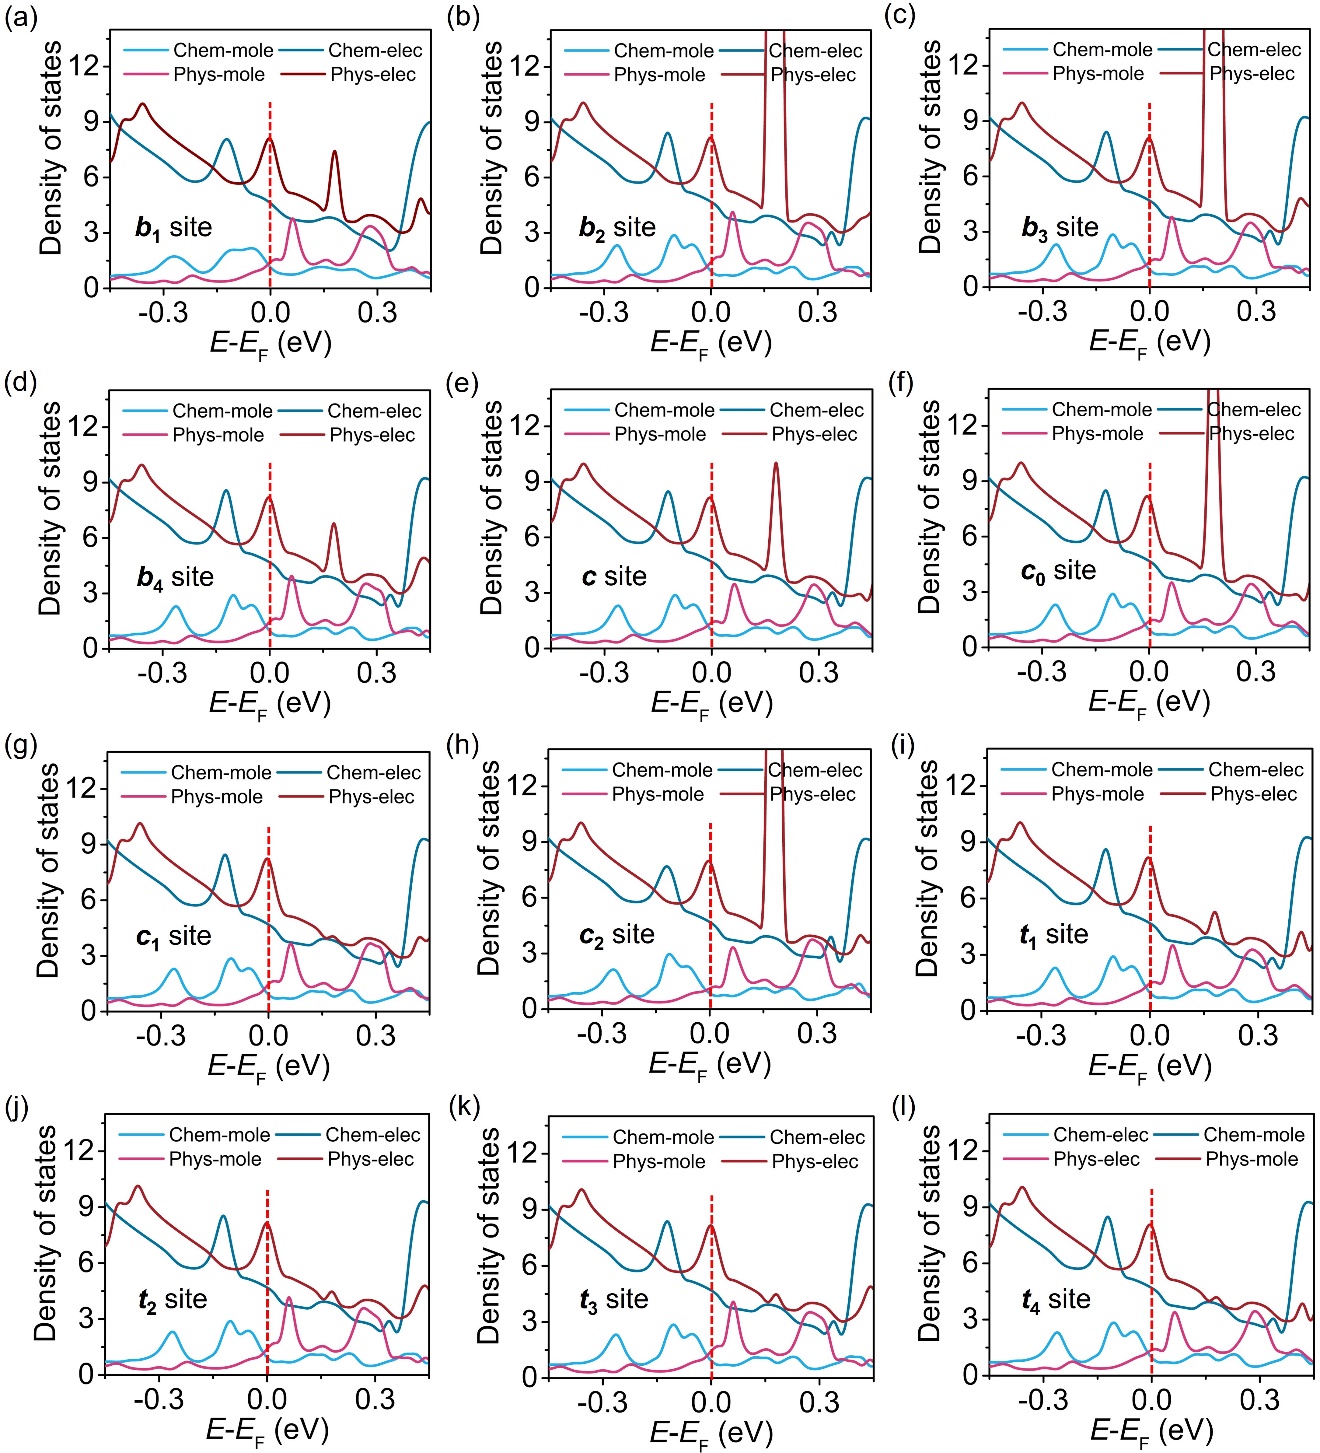


**Supplementary Fig. 10.** The diagrams of the partial DOS of the molecule and the tip electrode in the physisorption and chemisorption of the *trans*-ADS/Cu(111) system, with the tip positioned at different sites. The dashed lines indicate the Fermi level.


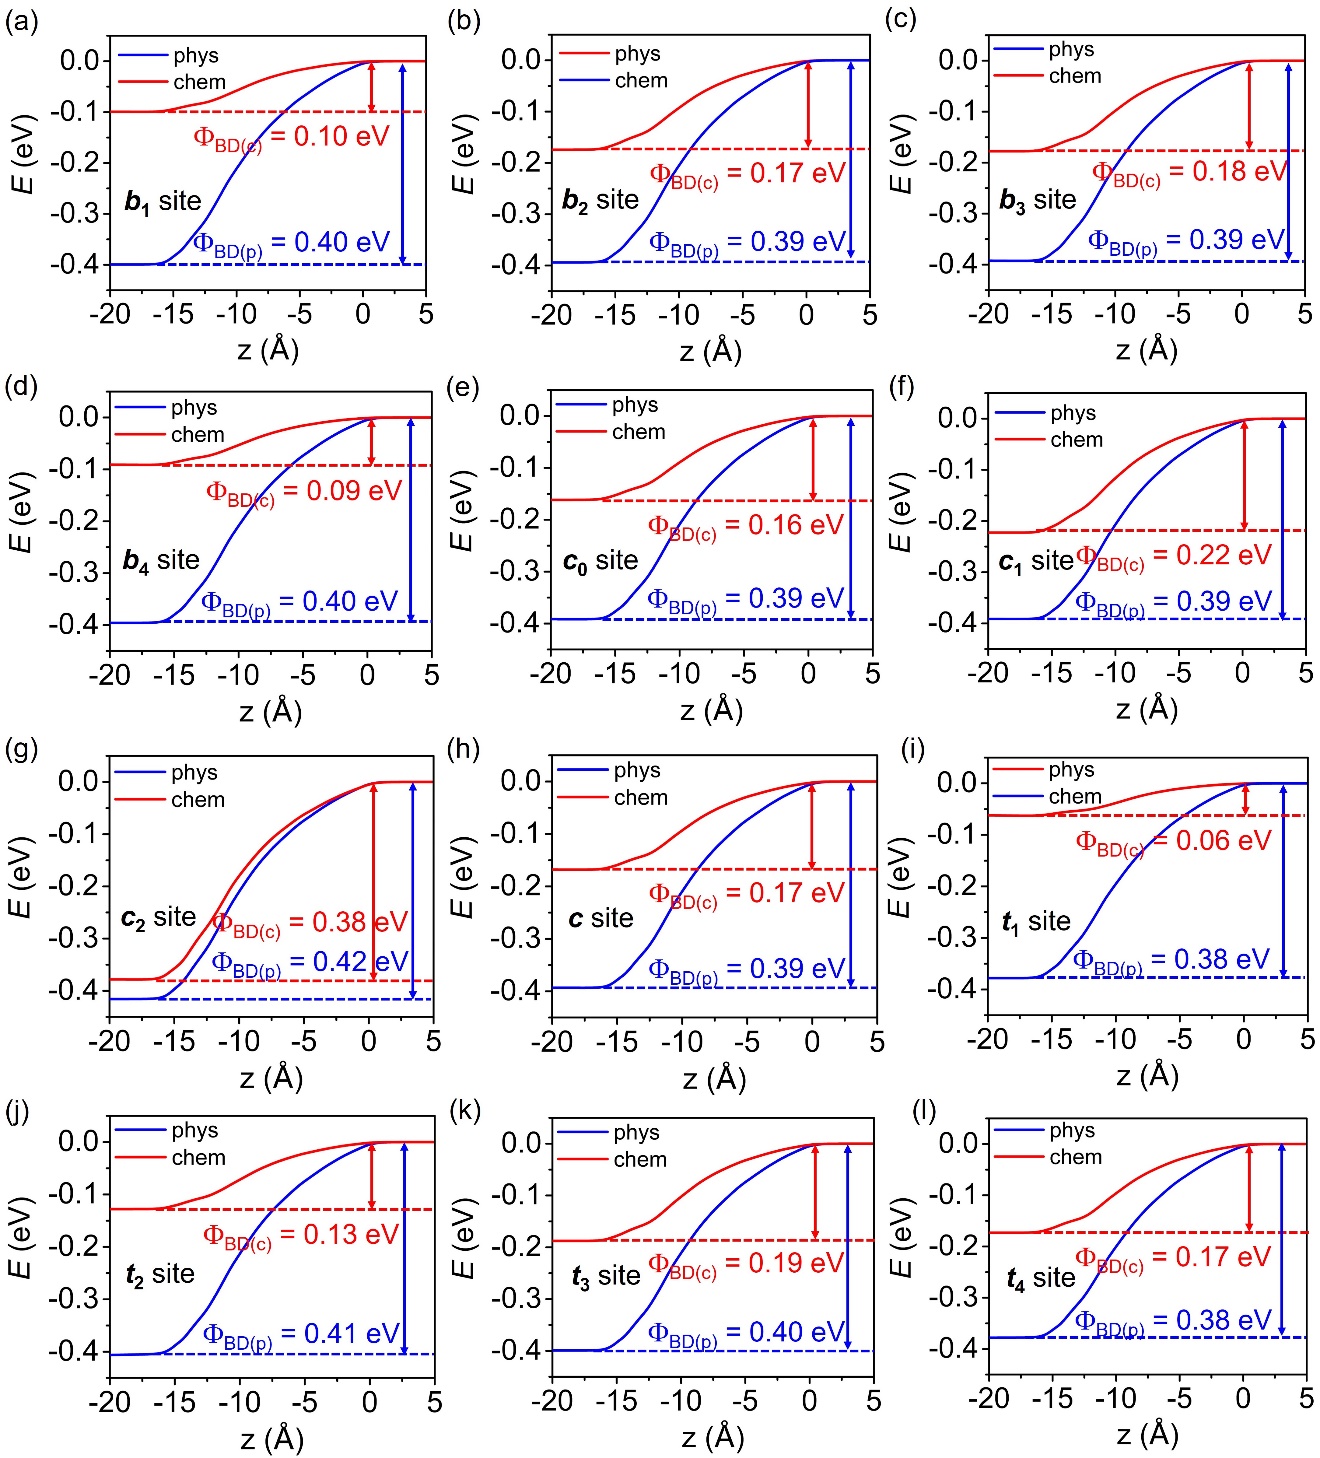


**Supplementary Fig. 11.** The bond dipole of the physisorbed and chemisorbed systems with the tip at different positions.


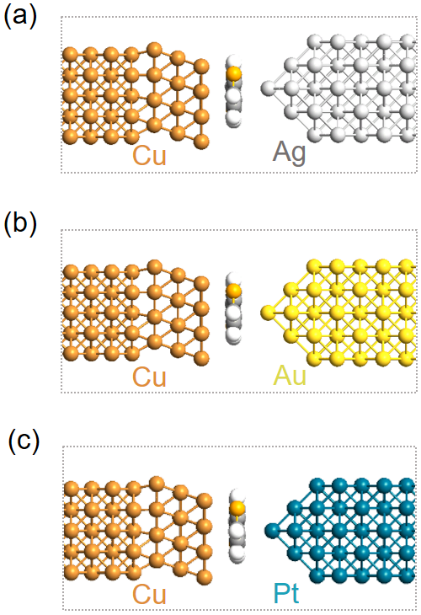


**Supplementary Fig. 12.** (a-c) The geometric structures employed to calculate the I-V characteristics of the *trans*-ADS/Cu(111) interface with asymmetric Ag, Au and Pt electrodes.


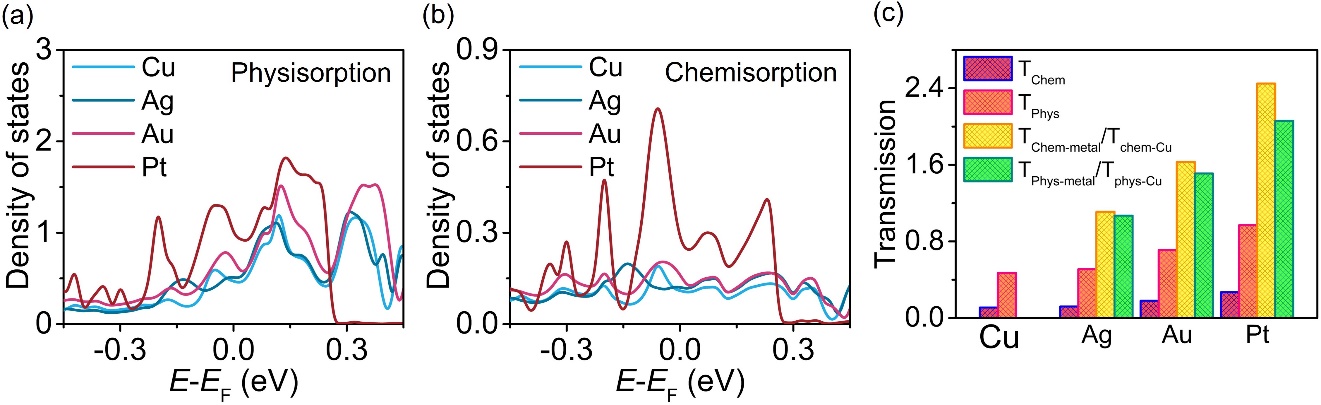


**Supplementary Fig. 13.** (a-b): Computed transmission spectra of physisorption and chemisorption of *trans*-ADS/Cu(111) in contact with different electrodes at zero bias voltage. (c) The transmission coefficient at the Fermi level for systems with different electrodes. Tchem-metal/Tchem-Cu and Tphys-metal/Tphys-Cu represents the coefficients increasing rate of the chemisorption and physisorption of asymmetric systems relative to that of the Cu/*trans*-ADS/Cu system.


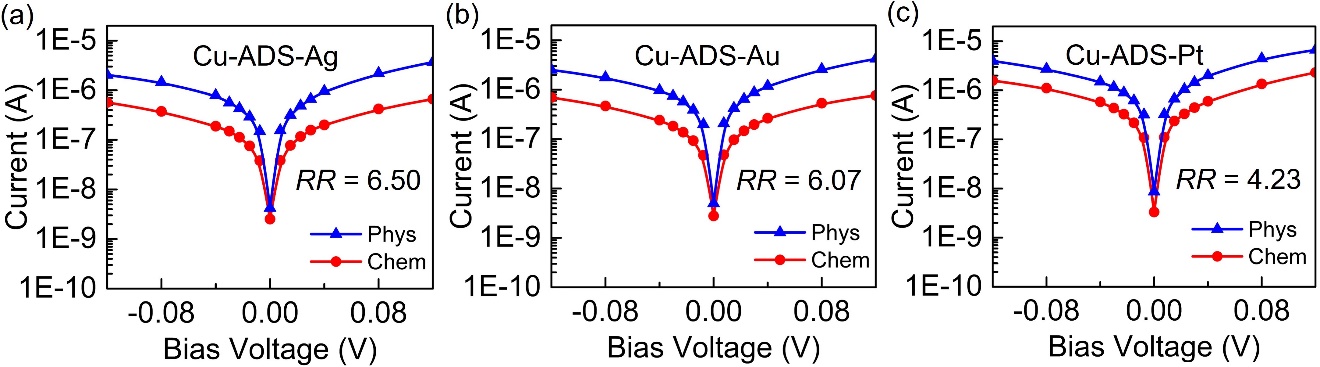


**Supplementary Fig. 14.** (a-c). First-principles simulation of transport properties for the physisorption and chemisorption of *trans*-ADS/Cu(111) with Ag, Au and Pt electrodes.

**Supplementary Table 1.** The calculated work functions of different metal surfaces, changes in work functions induced by the adsorption of organic molecules, interfacial dipoles, molecular dipoles, and interfacial Schottky barriers.

| Ben | **Ag** | **Cu** | **Au** | **Rh** | **Ir** | **Pt** |
| --- | --- | --- | --- | --- | --- | --- |
| WF | 4.44 | 4.83 | 5.20 | 5.27 | 5.59 | 5.75 |
| WF changes | −0.77 | −0.91 | −0.74 | −1.48 | −1.75 | −1.87 |
| Φmole | 0.02 | 0.02 | 0.02 | −0.82 | −0.92 | −0.84 |
| ΦBD | −0.79 | −0.93 | −0.76 | −0.66 | −0.83 | −1.03 |
| ΦB | 2.17 | 2.42 | 2.96 | 3.13 | 3.28 | 3.24 |
| Nc | **Ag** | **Cu** | **Au** | **Rh** | **Ir** | **Pt** |
| WF changes | −0.80 | −1.13 | −0.76 | −1.62 | −1.95 | −2.12 |
| Φmole | 0.03 | 0.01 | 0.02 | −0.90 | −1.02 | −0.97 |
| ΦBD | −0.83 | −1.14 | −0.78 | −0.72 | −0.93 | −1.15 |
| ΦB | 1.13 | 1.21 | 1.94 | 2.07 | 2.18 | 2.12 |
| Ac | **Ag** | **Cu** | **Au** | **Rh** | **Ir** | **Pt** |
| WF changes | −0.78 | −1.11 | −0.78 | −1.54 | −1.87 | −2.17 |
| Φmole | 0.02 | 0.17 | 0.03 | −0.94 | −1.07 | −1.03 |
| ΦBD | −0.8 | −0.94 | −0.81 | −0.6 | −0.8 | −1.14 |
| ΦB | 0.54 | 0.79 | 1.29 | 1.57 | 1.69 | 1.51 |
| Tc | **Ag** | **Cu** | **Au** | **Rh** | **Ir** | **Pt** |
| WF changes | −0.68 | −0.92 | −0.77 | −1.51 | −1.87 | −2.19 |
| Φmole | 0.02 | 0.17 | 0.03 | −0.94 | −1.09 | −1.07 |
| ΦBD | −0.7 | −0.75 | −0.80 | −0.57 | −0.78 | −1.12 |
| ΦB | 0.23 | 0.57 | 0.89 | 1.19 | 1.3 | 1.12 |
| Pc | **Ag** | **Cu** | **Au** | **Rh** | **Ir** | **Pt** |
| WF changes | −0.48 | −1.01 | −0.75 | −1.46 | −1.87 | -2.23 |
| Φmole | −0.01 | −0.16 | 0.04 | −0.95 | −1.12 | −1.1 |
| ΦBD | −0.47 | −0.85 | −0.79 | −0.51 | −0.75 | −1.13 |
| ΦB | 0.18 | 0.19 | 0.62 | 0.97 | 1.05 | 0.83 |

**Supplementary Table 2.** Calculated electron density of states (DOS) (eV−1) of the physisorbed and chemisorbed states at the fermi energy for the Cu/*trans*-ADS/Cu system with tip at distinct sites. *ρ*m and *ρ*t denotes the partial DOS of the *trans*-ADS molecule and the tip. *ρ*p and *ρ*c equal to the product of the DOS between the two in the physisorption and chemisorption, respectively.

| Tip site | ***t***1 | ***t***2 | ***t***3 | ***t***4 | ***c***0 | ***c*** |
| --- | --- | --- | --- | --- | --- | --- |
| *ρ*m-phys | 1.54 | 1.42 | 1.47 | 1.43 | 1.47 | 1.46 |
| *ρ*t-phys | 8.63 | 8.66 | 8.69 | 8.44 | 8.57 | 8.52 |
| *ρ*p | 13.29 | 12.30 | 12.77 | 12.07 | 12.60 | 12.44 |
| *ρ*m-chem | 0.93 | 0.89 | 0.88 | 0.91 | 0.90 | 0.91 |
| *ρ*t-chem | 4.70 | 4.70 | 4.70 | 4.70 | 4.69 | 4.69 |
| *ρ*c | 4.37 | 4.18 | 4.14 | 4.28 | 4.22 | 4.27 |
| *ρ*p/*ρ*c | 3.04 | 2.94 | 3.09 | 2.57 | 2.98 | 2.91 |
| Tip site | ***b***1 | ***b***2 | ***b***3 | ***b***4 | ***c***1 | ***c*2** |
| *ρ*m-phys | 1.46 | 1.44 | 1.42 | 1.51 | 1.54 | 1.13 |
| *ρ*t-phys | 8.58 | 8.69 | 8.55 | 8.71 | 8.75 | 8.38 |
| *ρ*p | 12.53 | 12.51 | 12.14 | 13.15 | 13.48 | 9.47 |
| *ρ*m-chem | 0.92 | 0.87 | 0.90 | 0.92 | 0.87 | 0.82 |
| *ρ*t-chem | 4.69 | 4.70 | 4.70 | 4.69 | 4.70 | 4.71 |
| *ρ*c | 4.31 | 4.09 | 4.23 | 4.31 | 4.09 | 3.86 |
| *ρ*p/*ρ*c | 2.90 | 3.06 | 2.87 | 3.05 | 3.30 | 2.45 |

**Supplementary Table 3.** Calculated Schottky barrier height difference between the chemisorbed ΦBc and physisorbed ΦBp (eV) systems of *trans*-ADS/Cu interface with tip at distinct sites.

| Tip site | ***t***1 | ***t***2 | ***t***3 | ***t***4 | ***c***0 | ***c*** |
| --- | --- | --- | --- | --- | --- | --- |
| ΦBc | 1.67 | 1.6 | 1.54 | 1.56 | 1.57 | 1.56 |
| ΦBp | 1.35 | 1.32 | 1.33 | 1.35 | 1.34 | 1.34 |
| ΦBc−ΦBp | 0.32 | 0.28 | 0.21 | 0.21 | 0.23 | 0.22 |
| Tip site | ***b***1 | ***b***2 | ***b***3 | ***b***4 | ***c***1 | ***c*2** |
| ΦBc | 1.63 | 1.56 | 1.55 | 1.64 | 1.51 | 1.35 |
| ΦBp | 1.33 | 1.34 | 1.34 | 1.33 | 1.34 | 1.31 |
| ΦBc−ΦBp | 0.3 | 0.22 | 0.21 | 0.31 | 0.17 | 0.04 |

**Supplementary Table 4.** Calculated tunneling width *w*2 (Å) difference between the physisorbed and chemisorbed states at asymmetric sites.

| Tip site | ***t***1 | ***t***2 | ***t***3 | ***t***4 | ***c***0 | ***c*** |
| --- | --- | --- | --- | --- | --- | --- |
| *w*c2 | 9.73 | 9.73 | 9.73 | 9.73 | 9.73 | 9.73 |
| *w*p2 | 3.50 | 3.96 | 5.34 | 4.97 | 4.62 | 4.71 |
| *w*c2−*w*p2 | 6.23 | 5.77 | 4.39 | 4.76 | 5.11 | 5.02 |
| Tip site | ***b***1 | ***b***2 | ***b***3 | ***b***4 | ***c***1 | ***c*2** |
| *w*c2 | 9.73 | 9.73 | 9.73 | 9.73 | 9.73 | 9.73 |
| *w*p2 | 4.20 | 5.24 | 5.24 | 3.96 | 5.24 | 6.71 |
| *w*c2−*w*p2 | 5.53 | 4.49 | 4.49 | 5.77 | 4.49 | 3.02 |

**Supplementary Table 5.** Calculated interfacial dipole difference ΦBDp−ΦBDc (eV) between the physisorbed and chemisorbed states at asymmetric sites.

| Tip site | ***t***1 | ***t***2 | ***t***3 | ***t***4 | ***c***0 | ***c*** |
| --- | --- | --- | --- | --- | --- | --- |
| ΦBDp−ΦBDc | 0.32 | 0.28 | 0.21 | 0.21 | 0.23 | 0.22 |
| Tip site | ***b***1 | ***b***2 | ***b***3 | ***b***4 | ***c***1 | ***c*2** |
| ΦBDp−ΦBDc | 0.30 | 0.22 | 0.21 | 0.31 | 0.17 | 0.04 |

**Supplementary Table 6.** Calculated bond dipole ΦBD (eV) and tunneling width *w* (Å) for the physisorbed and chemisorbed states of *trans*-ADS/Cu(111) systems with Ag electrode at asymmetric sites.

| Tip site | ***t***1 | ***t***2 | ***t***3 | ***t***4 | ***c***0 | ***c*** |
| --- | --- | --- | --- | --- | --- | --- |
| ΦBDp | 0.4 | 0.43 | 0.42 | 0.39 | 0.42 | 0.42 |
| ΦBDc | 0.05 | 0.13 | 0.19 | 0.18 | 0.16 | 0.17 |
| *w*p | 3.57 | 3.27 | 3.51 | 3.42 | 3.82 | 3.84 |
| *w*c | 4.12 | 4.16 | 4.12 | 4.14 | 4.12 | 4.12 |
| Tp−Tc | 4.25 | 2.35 | 1.95 | 1.47 | 3.41 | 3.31 |
| *RR* | 16.85 | 2.14 | 2.24 | 4.67 | 7.12 | 6.5 |
| Tip site | ***b***1 | ***b***2 | ***b***3 | ***b***4 | ***c***1 | ***c*2** |
| ΦBDp | 0.42 | 0.42 | 0.42 | 0.42 | 0.42 | 0.45 |
| ΦBDc | 0.1 | 0.18 | 0.18 | 0.09 | 0.23 | 0.39 |
| *w*p | 3.53 | 3.5 | 3.03 | 3.2 | 3.04 | 3.21 |
| *w*c | 4.16 | 4.16 | 4.16 | 4.16 | 4.12 | 4.16 |
| Tp−Tc | 3.51 | 2.03 | 0.74 | 2.74 | -0.02 | -2.11 |
| *RR* | 8.64 | 2.25 | 3.78 | 5.44 | 2.97 | 1.67 |

**Supplementary Table 7.** Calculated bond dipole ΦBD (eV) and tunneling width *w* (Å) for the physisorbed and chemisorbed states of *trans*-ADS/Cu(111) systems with Au electrode at asymmetric sites.

| Tip site | ***t***1 | ***t***2 | ***t***3 | ***t***4 | ***c***0 | ***c*** |
| --- | --- | --- | --- | --- | --- | --- |
| ΦBDp | 0.63 | 0.6 | 0.6 | 0.63 | 0.58 | 0.59 |
| ΦBDc | 0.55 | 0.56 | 0.57 | 0.57 | 0.57 | 0.57 |
| *w*p | 3.34 | 3.31 | 3.28 | 3.31 | 3.52 | 3.48 |
| *w*c | 4.01 | 4.01 | 4.01 | 4.01 | 4.01 | 4.01 |
| Tp−Tc | -1.82 | -2.43 | -2.71 | -2.26 | -1.96 | -2.02 |
| *RR* | 14.91 | 4.98 | 1.75 | 4.8 | 6.71 | 6.07 |
| Tip site | ***b***1 | ***b***2 | ***b***3 | ***b***4 | ***c***1 | ***c*2** |
| ΦBDp | 0.61 | 0.58 | 0.62 | 0.62 | 0.59 | 0.68 |
| ΦBDc | 0.56 | 0.56 | 0.57 | 0.55 | 0.58 | 0.62 |
| *w*p | 3.41 | 3.28 | 3.35 | 3.36 | 3.29 | 3.34 |
| *w*c | 4.01 | 4.01 | 4.01 | 4.01 | 4.01 | 4.01 |
| Tp−Tc | -1.91 | -2.76 | -2.21 | -1.86 | -2.94 | -3.01 |
| *RR* | 9.64 | 1.68 | 3.03 | 9.93 | 2.89 | 1.15 |

**Supplementary Table 8.** Calculated bond dipole ΦBD (eV) and tunneling width *w* (Å) for the physisorbed and chemisorbed states of *trans*-ADS/Cu(111) systems with Pt electrode at asymmetric sites.

| Tip site | ***t***1 | ***t***2 | ***t***3 | ***t***4 | ***c***0 | ***c*** |
| --- | --- | --- | --- | --- | --- | --- |
| ΦBDp | 0.93 | 0.9 | 0.9 | 0.91 | 0.89 | 0.9 |
| ΦBDc | 0.81 | 0.83 | 0.83 | 0.82 | 0.83 | 0.83 |
| *w*p | 3.27 | 3.23 | 3.23 | 3.24 | 3.24 | 3.25 |
| *w*c | 3.89 | 4.29 | 4.37 | 3.87 | 3.77 | 3.80 |
| Tp−Tc | -2.31 | -5.89 | -6.44 | -2.74 | -2.46 | -2.51 |
| *RR* | 7.83 | 1.71 | 1.27 | 3.3 | 4.69 | 4.23 |
| Tip site | ***b***1 | ***b***2 | ***b***3 | ***b***4 | ***c***1 | ***c*2** |
| ΦBDp | 0.93 | 0.84 | 0.92 | 0.93 | 0.88 | 0.96 |
| ΦBDc | 0.83 | 0.82 | 0.82 | 0.82 | 0.85 | 0.89 |
| *w*p | 3.24 | 3.27 | 3.26 | 3.24 | 3.25 | 3.26 |
| *w*c | 3.87 | 3.96 | 3.96 | 3.95 | 3.96 | 3.94 |
| Tp−Tc | -2.65 | -3.88 | -3.08 | -3.03 | -4.03 | -3.61 |
| *RR* | 3.7 | 1.44 | 2.62 | 2 | 1.35 | 1.7 |

**Section 3: Supplementary archive entries of the total energies, atomic coordinates of all asymmetric structures and input parameters employed for electrons transport calculations.**

**3.1 Totals energies (eV) of the Physisorption (Phys.) with 0.12 eV bias voltage applied, and Chemisorption (Chem.) with −0.12 eV applied.**

**Cu/*trans*-ADS/Cu system**

| Total energy | ***t***1 | ***t***2 | ***t***3 | ***t***4 | ***c***0 | ***c*** |
| --- | --- | --- | --- | --- | --- | --- |
| Phys. | -456.28 | -456.37 | -456.42 | -456.21 | -456.27 | -456.21 |
| Chem. | -444.40 | -444.43 | -444.46 | -444.43 | -444.43 | -444.38 |
| Total energy | ***b***1 | ***b***2 | ***b***3 | ***b***4 | ***c***1 | ***c*2** |
| Phys. | -456.36 | -456.44 | -456.33 | -456.37 | -456.33 | -456.31 |
| Chem. | -444.41 | -444.46 | -444.45 | -444.42 | -444.48 | -444.73 |

**Cu/*trans*-ADS/Ag system**

| Total energy | ***t***1 | ***t***2 | ***t***3 | ***t***4 | ***c***0 | ***c*** |
| --- | --- | --- | --- | --- | --- | --- |
| Phys. | -481.37 | -481.55 | -481.51 | -481.30 | -481.33 | -481.32 |
| Chem. | -469.49 | -469.53 | -469.57 | -469.53 | -469.47 | -469.47 |
| Total energy | ***b***1 | ***b***2 | ***b***3 | ***b***4 | ***c***1 | ***c*2** |
| Phys. | -481.44 | -481.52 | -481.41 | -481.46 | -481.43 | -481.40 |
| Chem. | -469.50 | -469.56 | -469.54 | -469.50 | -469.54 | -469.80 |

**Cu/*trans*-ADS/Au system**

| Total energy | ***t***1 | ***t***2 | ***t***3 | ***t***4 | ***c***0 | ***c*** |
| --- | --- | --- | --- | --- | --- | --- |
| Phys. | -473.11 | -473.37 | -473.33 | -473.02 | -473.07 | -473.00 |
| Chem. | -461.27 | -461.30 | -461.29 | -461.30 | -461.29 | -461.29 |
| Total energy | ***b***1 | ***b***2 | ***b***3 | ***b***4 | ***c***1 | ***c*2** |
| Phys. | -473.20 | -473.33 | -473.18 | -473.26 | -473.17 | -473.12 |
| Chem. | -461.27 | -461.35 | -461.32 | -461.28 | -461.39 | -461.39 |

**Cu/*trans*-ADS/Pt system**

| Total energy | ***t***1 | ***t***2 | ***t***3 | ***t***4 | ***c***0 | ***c*** |
| --- | --- | --- | --- | --- | --- | --- |
| Phys. | -449.23 | -449.36 | -449.29 | -438.55 | -449.19 | -449.09 |
| Chem. | -437.72 | -437.84 | -437.87 | -437.86 | -437.79 | -437.76 |
| Total energy | ***b***1 | ***b***2 | ***b***3 | ***b***4 | ***c***1 | ***c*2** |
| Phys. | -449.28 | -449.33 | -449.61 | -449.28 | -449.21 | -449.15 |
| Chem. | -437.77 | -437.87 | -437.84 | -438.09 | -438.02 | -438.34 |

**3.2 The input files for transport calculations of the *trans*-ADS/Cu system with tip at asymmetric sites, which includes the atomic coordinates of the structural geometries and the input parameters.** The visualization of these asymmetric structures can be realized by importing the following **.py** files into the Atomistix Toolkit (ATK) software.

**3.2.1 Cu/*trans*-ADS/Cu system**

**phys-Cu-ADS-Cu-*b*1.py**

# -*- coding: utf-8 -*-

# -------------------------------------------------------------

# Two-probe Configuration

# -------------------------------------------------------------

# -------------------------------------------------------------

# Left Electrode

# -------------------------------------------------------------

# Set up lattice

vector_a = [25.0, 0.0, 0.0]*Angstrom

vector_b = [0.0, 15.0, 0.0]*Angstrom

vector_c = [0.0, 0.0, 3.61470032]*Angstrom

left_electrode_lattice = UnitCell(vector_a, vector_b, vector_c)

# Define elements

left_electrode_elements = [Copper, Copper, Copper, Copper, Copper, Copper, Copper, Copper,

Copper, Copper, Copper, Copper, Copper, Copper, Copper]

# Define coordinates

left_electrode_coordinates = [[ 10.6926501976, 3.8852998008, 0.9035754 ],

[ 14.3073505176, 3.8852998008, 0.9035754 ],

[ 12.5000003576, 5.6926497208, 0.9035754 ],

[ 10.6926501976, 7.4999998808, 0.9035754 ],

[ 14.3073505176, 7.4999998808, 0.9035754 ],

[ 12.5000003576, 9.3073500408, 0.9035754 ],

[ 10.6926501976, 11.1147002008, 0.9035754 ],

[ 14.3073505176, 11.1147002008, 0.9035754 ],

[ 12.5000003576, 3.8852998008, 2.71092556 ],

[ 10.6926501976, 5.6926497208, 2.71092556 ],

[ 14.3073505176, 5.6926497208, 2.71092556 ],

[ 12.5000003576, 7.4999998808, 2.71092556 ],

[ 10.6926501976, 9.3073500408, 2.71092556 ],

[ 14.3073505176, 9.3073500408, 2.71092556 ],

[ 12.5000003576, 11.1147002008, 2.71092556 ]]*Angstrom

# Set up configuration

left_electrode = BulkConfiguration(

bravais_lattice=left_electrode_lattice,

elements=left_electrode_elements,

cartesian_coordinates=left_electrode_coordinates

)

# -------------------------------------------------------------

# Right Electrode

# -------------------------------------------------------------

# Set up lattice

vector_a = [25.0, 0.0, 0.0]*Angstrom

vector_b = [0.0, 15.0, 0.0]*Angstrom

vector_c = [0.0, 0.0, 3.6146965027]*Angstrom

right_electrode_lattice = UnitCell(vector_a, vector_b, vector_c)

# Define elements

right_electrode_elements = [Copper, Copper, Copper, Copper, Copper, Copper, Copper, Copper,

Copper, Copper, Copper, Copper, Copper, Copper, Copper]

# Define coordinates

right_electrode_coordinates = [[ 10.1173498413 , 5.274059881267, 0.9037728546 ],

[ 13.7320501587 , 5.274059881267, 0.9037728546 ],

[ 11.9247 , 7.081409801567, 0.9037728546 ],

[ 10.1173498413 , 8.888759960267, 0.9037728546 ],

[ 13.7320501587 , 8.888759960267, 0.9037728546 ],

[ 11.9247 , 10.696110118967, 0.9037728546 ],

[ 10.1173498413 , 12.503460277667, 0.9037728546 ],

[ 13.7320501587 , 12.503460277667, 0.9037728546 ],

[ 11.9247 , 5.274059881267, 2.7111230133 ],

[ 10.1173498413 , 7.081409801567, 2.7111230133 ],

[ 13.7320501587 , 7.081409801567, 2.7111230133 ],

[ 11.9247 , 8.888759960267, 2.7111230133 ],

[ 10.1173498413 , 10.696110118967, 2.7111230133 ],

[ 13.7320501587 , 10.696110118967, 2.7111230133 ],

[ 11.9247 , 12.503460277667, 2.7111230133 ]]*Angstrom

# Set up configuration

right_electrode = BulkConfiguration(

bravais_lattice=right_electrode_lattice,

elements=right_electrode_elements,

cartesian_coordinates=right_electrode_coordinates

)

# -------------------------------------------------------------

# Central Region

# -------------------------------------------------------------

# Set up lattice

vector_a = [25.0, 0.0, 0.0]*Angstrom

vector_b = [0.0, 15.0, 0.0]*Angstrom

vector_c = [0.0, 0.0, 30.167997226]*Angstrom

central_region_lattice = UnitCell(vector_a, vector_b, vector_c)

# Define elements

central_region_elements = [Copper, Copper, Copper, Copper, Copper, Copper, Copper, Copper,

Copper, Copper, Copper, Copper, Copper, Copper, Copper, Copper,

Copper, Copper, Copper, Copper, Copper, Copper, Copper, Copper,

Copper, Copper, Copper, Copper, Copper, Copper, Copper, Copper,

Copper, Copper, Copper, Copper, Copper, Copper, Copper, Copper,

Copper, Copper, Copper, Copper, Copper, Copper, Copper, Copper,

Copper, Copper, Copper, Copper, Copper, Copper, Copper, Copper,

Copper, Copper, Copper, Copper, Copper, Copper, Copper, Copper,

Copper, Copper, Copper, Copper, Copper, Copper, Copper, Copper,

Copper, Copper, Copper, Copper, Copper, Copper, Copper, Copper,

Copper, Copper, Copper, Copper, Copper, Copper, Copper, Copper,

Copper, Copper, Copper, Copper, Copper, Copper, Copper, Copper,

Copper, Copper, Copper, Copper, Copper, Copper, Copper, Copper,

Copper, Copper, Copper, Copper, Copper, Copper, Copper, Copper,

Copper, Copper, Copper, Copper, Copper, Copper, Copper, Copper,

Copper, Copper, Copper, Copper, Copper, Copper, Hydrogen, Hydrogen,

Hydrogen, Hydrogen, Carbon, Carbon, Hydrogen, Selenium, Hydrogen,

Carbon, Selenium, Hydrogen, Carbon, Hydrogen, Hydrogen, Carbon,

Hydrogen, Carbon, Carbon, Carbon, Carbon, Carbon, Carbon, Carbon,

Carbon, Carbon, Carbon, Carbon, Carbon, Carbon, Copper, Copper,

Copper, Copper, Copper, Copper, Copper, Copper, Copper, Copper,

Copper, Copper, Copper, Copper, Copper, Copper, Copper, Copper,

Copper, Copper, Copper, Copper, Copper, Copper, Copper, Copper,

Copper, Copper, Copper, Copper, Copper, Copper, Copper, Copper,

Copper, Copper, Copper, Copper, Copper, Copper, Copper, Copper]

# Define coordinates

central_region_coordinates = [[ 10.6926501976 , 3.8852998008 , 0.9035754 ],

[ 14.3073505176 , 3.8852998008 , 0.9035754 ],

[ 12.5000003576 , 5.6926497208 , 0.9035754 ],

[ 10.6926501976 , 7.4999998808 , 0.9035754 ],

[ 14.3073505176 , 7.4999998808 , 0.9035754 ],

[ 12.5000003576 , 9.3073500408 , 0.9035754 ],

[ 10.6926501976 , 11.1147002008 , 0.9035754 ],

[ 14.3073505176 , 11.1147002008 , 0.9035754 ],

[ 12.5000003576 , 3.8852998008 , 2.71092556 ],

[ 10.6926501976 , 5.6926497208 , 2.71092556 ],

[ 14.3073505176 , 5.6926497208 , 2.71092556 ],

[ 12.5000003576 , 7.4999998808 , 2.71092556 ],

[ 10.6926501976 , 9.3073500408 , 2.71092556 ],

[ 14.3073505176 , 9.3073500408 , 2.71092556 ],

[ 12.5000003576 , 11.1147002008 , 2.71092556 ],

[ 10.6926501976 , 3.8852998008 , 4.51827571 ],

[ 14.3073505176 , 3.8852998008 , 4.51827571 ],

[ 12.5000003576 , 5.6926497208 , 4.51827571 ],

[ 10.6926501976 , 7.4999998808 , 4.51827571 ],

[ 14.3073505176 , 7.4999998808 , 4.51827571 ],

[ 12.5000003576 , 9.3073500408 , 4.51827571 ],

[ 10.6926501976 , 11.1147002008 , 4.51827571 ],

[ 14.3073505176 , 11.1147002008 , 4.51827571 ],

[ 12.5000003576 , 3.8852998008 , 6.32562587 ],

[ 10.6926501976 , 5.6926497208 , 6.32562587 ],

[ 14.3073505176 , 5.6926497208 , 6.32562587 ],

[ 12.5000003576 , 7.4999998808 , 6.32562587 ],

[ 10.6926501976 , 9.3073500408 , 6.32562587 ],

[ 14.3073505176 , 9.3073500408 , 6.32562587 ],

[ 12.5000003576 , 11.1147002008 , 6.32562587 ],

[ 17.5967715978 , 9.3386067152 , 8.3295234528 ],

[ 12.4982122183 , 9.338783145 , 8.3295234528 ],

[ 15.0474427938 , 9.338783145 , 8.3295234528 ],

[ 7.4022172689 , 4.92195642 , 8.3305248108 ],

[ 8.6758559942 , 7.1302813292 , 8.3305248108 ],

[ 16.3218616247 , 7.1303704977 , 8.3305248108 ],

[ 11.2250322103 , 7.1307233572 , 8.3305248108 ],

[ 13.7725824117 , 7.1308115721 , 8.3305248108 ],

[ 7.4001153707 , 9.337459445 , 8.3305248108 ],

[ 9.9483741522 , 9.3377236128 , 8.3305248108 ],

[ 9.9506295919 , 4.9216035605 , 8.3315242615 ],

[ 18.8701728582 , 7.1298402548 , 8.3315242615 ],

[ 6.1271384954 , 7.1308115721 , 8.3315242615 ],

[ 2.3052273988 , 9.3372820616 , 8.3315242615 ],

[ 20.1456416845 , 9.3378123045 , 8.3315242615 ],

[ 12.4977124929 , 4.9221333265 , 8.3325237122 ],

[ 15.0472024679 , 4.923104167 , 8.3325237122 ],

[ 17.5956119299 , 4.9234575033 , 8.3325237122 ],

[ 1.0317283869 , 11.5441082716 , 8.3325237122 ],

[ 4.8536013365 , 4.9226626158 , 8.3335250702 ],

[ 4.8526204824 , 9.3372820616 , 8.3335250702 ],

[ 18.8703616857 , 11.5448979139 , 8.3335250702 ],

[ 16.3215926885 , 11.5455187559 , 8.3335250702 ],

[ 22.6925929784 , 4.9235452414 , 8.3345245209 ],

[ 3.5791333914 , 7.1301053763 , 8.3345245209 ],

[ 8.6743663549 , 11.5436686277 , 8.3345245209 ],

[ 11.2236922979 , 11.5448979139 , 8.3345245209 ],

[ 20.1432632208 , 4.9233692885 , 8.3355239716 ],

[ 3.5811084509 , 11.5424288511 , 8.3355239716 ],

[ 6.1270755529 , 11.5431383848 , 8.3355239716 ],

[ 13.7718518972 , 11.5467585325 , 8.3355239716 ],

[ 21.4163917303 , 7.1290453673 , 8.3365234222 ],

[ 16.3254722357 , 8.6050871611 , 10.3975204315 ],

[ 7.4034365415 , 6.3877586126 , 10.3985198822 ],

[ 18.8768924474 , 8.6034106016 , 10.3985198822 ],

[ 13.7747119665 , 8.6052645445 , 10.3985198822 ],

[ 9.9537853002 , 6.3889945746 , 10.3995193329 ],

[ 11.2250322103 , 8.6035870314 , 10.3995193329 ],

[ 8.6741193533 , 8.6019095183 , 10.4005206909 ],

[ 15.0479120016 , 6.3922604323 , 10.4025195923 ],

[ 12.5008720159 , 6.3902305365 , 10.4035209503 ],

[ 4.8547695875 , 6.3913773298 , 10.4055198517 ],

[ 17.5979522466 , 6.3919075728 , 10.4055198517 ],

[ 6.124993205 , 8.6024397612 , 10.4055198517 ],

[ 8.6783117056 , 4.1820815802 , 10.4065193024 ],

[ 21.4235728979 , 8.6018217802 , 10.4065193024 ],

[ 17.5978416204 , 10.8099688292 , 10.4065193024 ],

[ 15.0470327139 , 10.8105887175 , 10.4065193024 ],

[ 6.1300524473 , 4.1825236082 , 10.4075206604 ],

[ 13.77498281 , 4.1855243445 , 10.4075206604 ],

[ 9.9520400762 , 10.808118701 , 10.4075206604 ],

[ 20.1480315923 , 10.8086479902 , 10.4075206604 ],

[ 16.3233932256 , 4.1862305403 , 10.4085201111 ],

[ 3.5769883394 , 8.6006735563 , 10.4085201111 ],

[ 2.3083823919 , 10.8060883284 , 10.4085201111 ],

[ 12.4992822408 , 10.8076781035 , 10.4085201111 ],

[ 11.226362586 , 4.1837595701 , 10.4095195618 ],

[ 23.9682716131 , 4.1861423254 , 10.4105209198 ],

[ 21.4196132421 , 4.1876434088 , 10.4105209198 ],

[ 22.6926330328 , 6.3927901983 , 10.4115203705 ],

[ 7.401640296 , 10.8059080839 , 10.4115203705 ],

[ 18.8695625066 , 4.1894096136 , 10.4155200806 ],

[ 20.1413730383 , 6.3917301893 , 10.4155200806 ],

[ 4.8580693006 , 10.8042286635 , 10.4165195312 ],

[ 17.6028426885 , 7.8792494536 , 12.4435199585 ],

[ 7.4003232717 , 7.8543542624 , 12.4455207672 ],

[ 15.0510619878 , 7.8713043928 , 12.4475196686 ],

[ 9.9517930746 , 7.8621233702 , 12.4485210266 ],

[ 12.5014823675 , 7.8676842451 , 12.4485210266 ],

[ 8.68472898 , 5.6544164419 , 12.4695209351 ],

[ 16.3181327581 , 10.0786579847 , 12.4715198364 ],

[ 16.315292716 , 5.6593593359 , 12.4725192871 ],

[ 4.850279212 , 7.8617705107 , 12.4725192871 ],

[ 20.1516631841 , 7.8707741499 , 12.4725192871 ],

[ 6.1308635473 , 5.6543272734 , 12.4735206451 ],

[ 8.6862453222 , 10.0728281736 , 12.4745200958 ],

[ 18.8722518682 , 10.0786579847 , 12.4745200958 ],

[ 11.2296222448 , 5.6594485045 , 12.4775203552 ],

[ 13.7753823995 , 5.6615666151 , 12.4795192566 ],

[ 13.7727721929 , 10.0747784376 , 12.4795192566 ],

[ 11.2267020941 , 10.0721281767 , 12.4815200653 ],

[ 12.5062822103 , 3.4577444792 , 12.4845203247 ],

[ 7.4079812765 , 3.4532414675 , 12.4855197754 ],

[ 17.5894016027 , 3.4532414675 , 12.4865211334 ],

[ 22.6909126043 , 3.4532414675 , 12.4865211334 ],

[ 1.0334143638 , 10.0746887922 , 12.4865211334 ],

[ 3.581941247 , 5.6576822996 , 12.4875205841 ],

[ 15.0485318899 , 3.4532414675 , 12.4895194855 ],

[ 20.1410716772 , 3.4532414675 , 12.4895194855 ],

[ 9.9574121237 , 3.453594327 , 12.4895194855 ],

[ 4.855898261 , 3.4532414675 , 12.4905208435 ],

[ 3.5851904154 , 10.0723885298 , 12.4915202942 ],

[ 21.4170516729 , 5.6589182615 , 12.4925197449 ],

[ 2.3069642782 , 7.8663605452 , 12.4925197449 ],

[ 18.8651832342 , 5.6610373259 , 12.5005210724 ],

[ 6.1369675398 , 10.0718582869 , 12.5005210724 ],

[ 19.5994724035 , 8.3293017149 , 15.2635196533 ],

[ 5.3906463384 , 7.4332584143 , 15.2665199127 ],

[ 7.266028285 , 5.6183093786 , 15.3015197601 ],

[ 17.7235816717 , 10.1437186003 , 15.311519989 ],

[ 18.5279124975 , 8.1502693892 , 15.3155196991 ],

[ 6.4621514082 , 7.6120256186 , 15.3175205078 ],

[ 9.9774373769 , 5.4150885344 , 15.3295196381 ],

[ 17.8968318701 , 6.3442362547 , 15.3355201569 ],

[ 12.4450124502 , 5.3792475462 , 15.3395198669 ],

[ 7.4641383886 , 6.6904705763 , 15.3395198669 ],

[ 7.0937441587 , 9.4175289869 , 15.3415206757 ],

[ 15.0124725103 , 10.3460587263 , 15.3415206757 ],

[ 17.5255721807 , 9.0713833571 , 15.3455203857 ],

[ 14.9114221334 , 5.3143614531 , 15.3505195465 ],

[ 12.5454124212 , 10.3817280531 , 15.3515209045 ],

[ 9.9966491461 , 6.5061415434 , 15.3605197754 ],

[ 10.0795120001 , 10.4467886686 , 15.3625205841 ],

[ 12.467642188 , 6.4707411528 , 15.3665202942 ],

[ 14.993522048 , 9.2549170256 , 15.3675197449 ],

[ 12.5226320028 , 9.2901400328 , 15.3735202637 ],

[ 14.9397023916 , 6.4045313597 , 15.3805202332 ],

[ 11.2498019933 , 7.1785701513 , 15.386520752 ],

[ 8.8035310507 , 7.2244762182 , 15.386520752 ],

[ 10.0510219335 , 9.3566149473 , 15.386520752 ],

[ 16.1864818334 , 8.5368469954 , 15.3895210114 ],

[ 13.7406724691 , 8.582311511 , 15.3895210114 ],

[ 13.7089723348 , 7.1293982267 , 15.3915199127 ],

[ 11.2813028097 , 8.6314829588 , 15.3945201721 ],

[ 16.1298621893 , 7.0992072821 , 15.4015201416 ],

[ 8.8606122732 , 8.6620281935 , 15.4035209503 ],

[ 11.9247 , 8.888759960267, 18.4203265991 ],

[ 11.9247 , 7.081409801567, 20.2276767578 ],

[ 10.1173498413 , 8.888759960267, 20.2276767578 ],

[ 13.7320501587 , 8.888759960267, 20.2276767578 ],

[ 11.9247 , 10.696110118967, 20.2276767578 ],

[ 11.9247 , 5.274059881267, 22.0350269165 ],

[ 10.1173498413 , 7.081409801567, 22.0350269165 ],

[ 13.7320501587 , 7.081409801567, 22.0350269165 ],

[ 11.9247 , 8.888759960267, 22.0350269165 ],

[ 10.1173498413 , 10.696110118967, 22.0350269165 ],

[ 13.7320501587 , 10.696110118967, 22.0350269165 ],

[ 11.9247 , 12.503460277667, 22.0350269165 ],

[ 10.1173498413 , 5.274059881267, 23.8423770752 ],

[ 13.7320501587 , 5.274059881267, 23.8423770752 ],

[ 11.9247 , 7.081409801567, 23.8423770752 ],

[ 10.1173498413 , 8.888759960267, 23.8423770752 ],

[ 13.7320501587 , 8.888759960267, 23.8423770752 ],

[ 11.9247 , 10.696110118967, 23.8423770752 ],

[ 10.1173498413 , 12.503460277667, 23.8423770752 ],

[ 13.7320501587 , 12.503460277667, 23.8423770752 ],

[ 11.9247 , 5.274059881267, 25.6497272339 ],

[ 10.1173498413 , 7.081409801567, 25.6497272339 ],

[ 13.7320501587 , 7.081409801567, 25.6497272339 ],

[ 11.9247 , 8.888759960267, 25.6497272339 ],

[ 10.1173498413 , 10.696110118967, 25.6497272339 ],

[ 13.7320501587 , 10.696110118967, 25.6497272339 ],

[ 11.9247 , 12.503460277667, 25.6497272339 ],

[ 10.1173498413 , 5.274059881267, 27.4570773926 ],

[ 13.7320501587 , 5.274059881267, 27.4570773926 ],

[ 11.9247 , 7.081409801567, 27.4570773926 ],

[ 10.1173498413 , 8.888759960267, 27.4570773926 ],

[ 13.7320501587 , 8.888759960267, 27.4570773926 ],

[ 11.9247 , 10.696110118967, 27.4570773926 ],

[ 10.1173498413 , 12.503460277667, 27.4570773926 ],

[ 13.7320501587 , 12.503460277667, 27.4570773926 ],

[ 11.9247 , 5.274059881267, 29.2644275513 ],

[ 10.1173498413 , 7.081409801567, 29.2644275513 ],

[ 13.7320501587 , 7.081409801567, 29.2644275513 ],

[ 11.9247 , 8.888759960267, 29.2644275513 ],

[ 10.1173498413 , 10.696110118967, 29.2644275513 ],

[ 13.7320501587 , 10.696110118967, 29.2644275513 ],

[ 11.9247 , 12.503460277667, 29.2644275513 ]]*Angstrom

# Set up configuration

central_region = BulkConfiguration(

bravais_lattice=central_region_lattice,

elements=central_region_elements,

cartesian_coordinates=central_region_coordinates

)

device_configuration = DeviceConfiguration(

central_region,

[left_electrode, right_electrode],

equivalent_electrode_lengths=[7.22940064, 7.2293930054]*Angstrom,

transverse_electrode_repetitions=[[1, 1], [1, 1]],

)

# -------------------------------------------------------------

# Calculator

# -------------------------------------------------------------

#----------------------------------------

# Basis Set

#----------------------------------------

basis_set = [

GGABasis.Hydrogen_DoubleZetaPolarized,

GGABasis.Carbon_DoubleZetaPolarized,

GGABasis.Copper_DoubleZetaPolarized,

GGABasis.Selenium_DoubleZetaPolarized,

]

#----------------------------------------

# Numerical Accuracy Settings

#----------------------------------------

device_k_point_sampling = MonkhorstPackGrid(

na=2,

nc=261,

)

device_numerical_accuracy_parameters = NumericalAccuracyParameters(

density_mesh_cutoff=100.0*Hartree,

k_point_sampling=device_k_point_sampling,

)

#----------------------------------------

# Contour Integral Settings

#----------------------------------------

equilibrium_contour = SemiCircleContour(

integral_lower_bound=1.84481605655*Hartree,

circle_points=30,

)

contour_parameters = ContourParameters(

equilibrium_contour=equilibrium_contour,

)

#----------------------------------------

# Device Calculator

#----------------------------------------

calculator = DeviceLCAOCalculator(

basis_set=basis_set,

numerical_accuracy_parameters=device_numerical_accuracy_parameters,

contour_parameters=contour_parameters,

)

device_configuration.setCalculator(calculator)

nlprint(device_configuration)

nlsave('phys-Cu-ADS-Cu-b1.hdf5', device_configuration)

# -------------------------------------------------------------

# IV Characteristics

# -------------------------------------------------------------

# Kpoint sampling

kpoint_grid = KpointDensity(

density_a=7.0*Angstrom,

density_b=2.38732414638*Angstrom,

density_c=0.0*Angstrom,

)

# Gate-source voltages

gate_source_voltages = numpy.linspace(0, 0, 1)*Volt

# Drain-source voltages

drain_source_voltages = numpy.linspace(-0.12, 0.04, 3)*Volt

# File name.

filename = 'phys-Cu-ADS-Cu-b1.hdf5'

iv_characteristics = IVCharacteristics(

configuration=device_configuration,

filename=filename,

object_id='ivcharacteristics',

gate_regions=[],

gate_source_voltages=gate_source_voltages,

drain_source_voltages=drain_source_voltages,

energies=numpy.linspace(-2, 2, 201)*eV,

kpoints=kpoint_grid,

self_energy_calculator=RecursionSelfEnergy(),

energy_zero_parameter=AverageFermiLevel,

infinitesimal=1e-06*eV,

log_filename_prefix='ivcharacteristics_',

number_of_processes_per_task=None,

enforce_zero_transmission_in_band_gap=True,

)

iv_characteristics.update()

**chem-Cu-ADS-Cu-*b*1.py**

# -*- coding: utf-8 -*-

# -------------------------------------------------------------

# Two-probe Configuration

# -------------------------------------------------------------

# -------------------------------------------------------------

# Left Electrode

# -------------------------------------------------------------

# Set up lattice

vector_a = [25.0, 0.0, 0.0]*Angstrom

vector_b = [0.0, 15.0, 0.0]*Angstrom

vector_c = [0.0, 0.0, 3.61470032]*Angstrom

left_electrode_lattice = UnitCell(vector_a, vector_b, vector_c)

# Define elements

left_electrode_elements = [Copper, Copper, Copper, Copper, Copper, Copper, Copper, Copper,

Copper, Copper, Copper, Copper, Copper, Copper, Copper]

# Define coordinates

left_electrode_coordinates = [[ 10.6926496004 , 3.88530015845, 0.9035754 ],

[ 14.3073499204 , 3.88530015845, 0.9035754 ],

[ 12.4999997604 , 5.69265007845, 0.9035754 ],

[ 10.6926496004 , 7.50000023845, 0.9035754 ],

[ 14.3073499204 , 7.50000023845, 0.9035754 ],

[ 12.4999997604 , 9.30735039845, 0.9035754 ],

[ 10.6926496004 , 11.11470055845, 0.9035754 ],

[ 14.3073499204 , 11.11470055845, 0.9035754 ],

[ 12.4999997604 , 3.88530015845, 2.71092556 ],

[ 10.6926496004 , 5.69265007845, 2.71092556 ],

[ 14.3073499204 , 5.69265007845, 2.71092556 ],

[ 12.4999997604 , 7.50000023845, 2.71092556 ],

[ 10.6926496004 , 9.30735039845, 2.71092556 ],

[ 14.3073499204 , 9.30735039845, 2.71092556 ],

[ 12.4999997604 , 11.11470055845, 2.71092556 ]]*Angstrom

# Set up configuration

left_electrode = BulkConfiguration(

bravais_lattice=left_electrode_lattice,

elements=left_electrode_elements,

cartesian_coordinates=left_electrode_coordinates

)

# -------------------------------------------------------------

# Right Electrode

# -------------------------------------------------------------

# Set up lattice

vector_a = [25.0, 0.0, 0.0]*Angstrom

vector_b = [0.0, 15.0, 0.0]*Angstrom

vector_c = [0.0, 0.0, 3.6146965027]*Angstrom

right_electrode_lattice = UnitCell(vector_a, vector_b, vector_c)

# Define elements

right_electrode_elements = [Copper, Copper, Copper, Copper, Copper, Copper, Copper, Copper,

Copper, Copper, Copper, Copper, Copper, Copper, Copper]

# Define coordinates

right_electrode_coordinates = [[ 10.1173498413 , 5.274059881267, 0.9037728546 ],

[ 13.7320501587 , 5.274059881267, 0.9037728546 ],

[ 11.9247 , 7.081409801567, 0.9037728546 ],

[ 10.1173498413 , 8.888759960267, 0.9037728546 ],

[ 13.7320501587 , 8.888759960267, 0.9037728546 ],

[ 11.9247 , 10.696110118967, 0.9037728546 ],

[ 10.1173498413 , 12.503460277667, 0.9037728546 ],

[ 13.7320501587 , 12.503460277667, 0.9037728546 ],

[ 11.9247 , 5.274059881267, 2.7111230133 ],

[ 10.1173498413 , 7.081409801567, 2.7111230133 ],

[ 13.7320501587 , 7.081409801567, 2.7111230133 ],

[ 11.9247 , 8.888759960267, 2.7111230133 ],

[ 10.1173498413 , 10.696110118967, 2.7111230133 ],

[ 13.7320501587 , 10.696110118967, 2.7111230133 ],

[ 11.9247 , 12.503460277667, 2.7111230133 ]]*Angstrom

# Set up configuration

right_electrode = BulkConfiguration(

bravais_lattice=right_electrode_lattice,

elements=right_electrode_elements,

cartesian_coordinates=right_electrode_coordinates

)

# -------------------------------------------------------------

# Central Region

# -------------------------------------------------------------

# Set up lattice

vector_a = [25.0, 0.0, 0.0]*Angstrom

vector_b = [0.0, 15.0, 0.0]*Angstrom

vector_c = [0.0, 0.0, 30.167997226]*Angstrom

central_region_lattice = UnitCell(vector_a, vector_b, vector_c)

# Define elements

central_region_elements = [Copper, Copper, Copper, Copper, Copper, Copper, Copper, Copper,

Copper, Copper, Copper, Copper, Copper, Copper, Copper, Copper,

Copper, Copper, Copper, Copper, Copper, Copper, Copper, Copper,

Copper, Copper, Copper, Copper, Copper, Copper, Copper, Copper,

Copper, Copper, Copper, Copper, Copper, Copper, Copper, Copper,

Copper, Copper, Copper, Copper, Copper, Copper, Copper, Copper,

Copper, Copper, Copper, Copper, Copper, Copper, Copper, Copper,

Copper, Copper, Copper, Copper, Copper, Copper, Copper, Copper,

Copper, Copper, Copper, Copper, Copper, Copper, Copper, Copper,

Copper, Copper, Copper, Copper, Copper, Copper, Copper, Copper,

Copper, Copper, Copper, Copper, Copper, Copper, Copper, Copper,

Copper, Copper, Copper, Copper, Copper, Copper, Copper, Copper,

Copper, Copper, Copper, Copper, Copper, Copper, Copper, Copper,

Copper, Copper, Copper, Copper, Copper, Copper, Copper, Copper,

Copper, Copper, Copper, Copper, Copper, Copper, Copper, Copper,

Copper, Copper, Copper, Copper, Copper, Copper, Carbon, Carbon,

Carbon, Carbon, Carbon, Carbon, Carbon, Hydrogen, Carbon, Hydrogen,

Carbon, Hydrogen, Hydrogen, Carbon, Hydrogen, Carbon, Hydrogen,

Carbon, Selenium, Selenium, Carbon, Carbon, Carbon, Carbon, Carbon,

Carbon, Hydrogen, Hydrogen, Hydrogen, Hydrogen, Copper, Copper,

Copper, Copper, Copper, Copper, Copper, Copper, Copper, Copper,

Copper, Copper, Copper, Copper, Copper, Copper, Copper, Copper,

Copper, Copper, Copper, Copper, Copper, Copper, Copper, Copper,

Copper, Copper, Copper, Copper, Copper, Copper, Copper, Copper,

Copper, Copper, Copper, Copper, Copper, Copper, Copper, Copper]

# Define coordinates

central_region_coordinates = [[ 10.6926496004 , 3.88530015845 , 0.9035754 ],

[ 14.3073499204 , 3.88530015845 , 0.9035754 ],

[ 12.4999997604 , 5.69265007845 , 0.9035754 ],

[ 10.6926496004 , 7.50000023845 , 0.9035754 ],

[ 14.3073499204 , 7.50000023845 , 0.9035754 ],

[ 12.4999997604 , 9.30735039845 , 0.9035754 ],

[ 10.6926496004 , 11.11470055845 , 0.9035754 ],

[ 14.3073499204 , 11.11470055845 , 0.9035754 ],

[ 12.4999997604 , 3.88530015845 , 2.71092556 ],

[ 10.6926496004 , 5.69265007845 , 2.71092556 ],

[ 14.3073499204 , 5.69265007845 , 2.71092556 ],

[ 12.4999997604 , 7.50000023845 , 2.71092556 ],

[ 10.6926496004 , 9.30735039845 , 2.71092556 ],

[ 14.3073499204 , 9.30735039845 , 2.71092556 ],

[ 12.4999997604 , 11.11470055845 , 2.71092556 ],

[ 10.6926496004 , 3.88530015845 , 4.51827571 ],

[ 14.3073499204 , 3.88530015845 , 4.51827571 ],

[ 12.4999997604 , 5.69265007845 , 4.51827571 ],

[ 10.6926496004 , 7.50000023845 , 4.51827571 ],

[ 14.3073499204 , 7.50000023845 , 4.51827571 ],

[ 12.4999997604 , 9.30735039845 , 4.51827571 ],

[ 10.6926496004 , 11.11470055845 , 4.51827571 ],

[ 14.3073499204 , 11.11470055845 , 4.51827571 ],

[ 12.4999997604 , 3.88530015845 , 6.32562587 ],

[ 10.6926496004 , 5.69265007845 , 6.32562587 ],

[ 14.3073499204 , 5.69265007845 , 6.32562587 ],

[ 12.4999997604 , 7.50000023845 , 6.32562587 ],

[ 10.6926496004 , 9.30735039845 , 6.32562587 ],

[ 14.3073499204 , 9.30735039845 , 6.32562587 ],

[ 12.4999997604 , 11.11470055845 , 6.32562587 ],

[ 3.5799309611 , 11.55716919905 , 8.3275264587 ],

[ 15.0424889922 , 9.34946560865 , 8.3295253601 ],

[ 8.6729840636 , 11.56228852275 , 8.3295253601 ],

[ 11.2219085097 , 11.56317830085 , 8.3295253601 ],

[ 12.4971389175 , 9.34840607645 , 8.3305267181 ],

[ 6.1268658042 , 11.56008839615 , 8.3305267181 ],

[ 7.4030150771 , 9.34725880625 , 8.3315261688 ],

[ 2.3047119975 , 9.34911274915 , 8.3315261688 ],

[ 18.8709697127 , 11.55831837655 , 8.3315261688 ],

[ 13.7716493011 , 11.56228852275 , 8.3315261688 ],

[ 9.9510316253 , 4.93961262705 , 8.3325256195 ],

[ 4.8561820388 , 9.34734654425 , 8.3325256195 ],

[ 17.592489183 , 9.34955334665 , 8.3325256195 ],

[ 20.1437987685 , 9.35052514075 , 8.3325256195 ],

[ 16.3206691146 , 11.55911850935 , 8.3325256195 ],

[ 1.0331498981 , 11.55964875225 , 8.3325256195 ],

[ 9.9480122924 , 9.34611058235 , 8.3335269775 ],

[ 22.6923789382 , 4.93696475035 , 8.3345264282 ],

[ 4.8549208045 , 4.93731760985 , 8.3345264282 ],

[ 7.4022120833 , 4.93996596335 , 8.3345264282 ],

[ 3.5815238357 , 7.14255261425 , 8.3345264282 ],

[ 20.1435584426 , 4.93908381465 , 8.3355258789 ],

[ 17.5950984359 , 4.94058394435 , 8.3355258789 ],

[ 6.1295790076 , 7.14211153985 , 8.3355258789 ],

[ 18.8674086928 , 7.14202284815 , 8.3365253296 ],

[ 12.4989890456 , 4.94323277475 , 8.3375266876 ],

[ 15.0471991897 , 4.94393897055 , 8.3375266876 ],

[ 21.4148597121 , 7.14193463325 , 8.3375266876 ],

[ 8.6792153716 , 7.14105153085 , 8.339525589 ],

[ 11.2287492156 , 7.14193463325 , 8.339525589 ],

[ 16.3195590377 , 7.14069867135 , 8.3435252991 ],

[ 13.7724189162 , 7.14131665235 , 8.3445266571 ],

[ 9.9445418716 , 10.81861901285 , 10.3835281219 ],

[ 12.4942788482 , 10.82444882395 , 10.3865283813 ],

[ 7.3989838958 , 10.81438851355 , 10.3915275421 ],

[ 8.6754521728 , 4.19232296945 , 10.3925289001 ],

[ 15.0467690826 , 10.82656884195 , 10.3935283508 ],

[ 4.85342592 , 10.81367897995 , 10.3955272522 ],

[ 18.8749980331 , 8.61868405345 , 10.4005283203 ],

[ 17.6007880569 , 10.82532906535 , 10.4005283203 ],

[ 2.3080720305 , 10.81685853005 , 10.401527771 ],

[ 11.2252387404 , 4.20123887065 , 10.4035285797 ],

[ 16.3124694228 , 8.61912465095 , 10.4035285797 ],

[ 20.1508292556 , 10.82391858105 , 10.4035285797 ],

[ 3.5782069564 , 8.61162114145 , 10.4045280304 ],

[ 13.7743186355 , 4.20750689505 , 10.4065288391 ],

[ 22.6971186996 , 6.40797495845 , 10.4075282898 ],

[ 6.1288227439 , 4.20088553435 , 10.4085277405 ],

[ 23.9680690169 , 4.20097374915 , 10.4085277405 ],

[ 16.3220691085 , 4.20865464215 , 10.4085277405 ],

[ 21.4198493362 , 8.61426949505 , 10.4085277405 ],

[ 21.420368135 , 4.20397591595 , 10.4095290985 ],

[ 4.8575667739 , 6.40488457685 , 10.4125274506 ],

[ 6.1290659308 , 8.60738396645 , 10.4125274506 ],

[ 11.2245187163 , 8.61117959025 , 10.4125274506 ],

[ 13.7693585753 , 8.61524033545 , 10.4135288086 ],

[ 18.8718585372 , 4.20768380165 , 10.4145282593 ],

[ 8.6706475616 , 8.60508751875 , 10.4185279694 ],

[ 9.9620370269 , 6.40717959405 , 10.4205287781 ],

[ 7.4011368156 , 6.41044688225 , 10.4205287781 ],

[ 20.141158998 , 6.40656256675 , 10.4235290375 ],

[ 17.5994796157 , 6.40444350245 , 10.4285281982 ],

[ 15.0432690978 , 6.41159367565 , 10.4465278473 ],

[ 12.5025491118 , 6.41097664835 , 10.448528656 ],

[ 8.6872720122 , 5.64647078515 , 12.4315284576 ],

[ 17.5970286727 , 7.91191363335 , 12.434528717 ],

[ 12.503269136 , 3.43682169915 , 12.4465278473 ],

[ 13.7715491653 , 10.12773919105 , 12.447527298 ],

[ 15.0574387908 , 3.44732785225 , 12.448528656 ],

[ 11.2188491225 , 10.11361908915 , 12.4495281067 ],

[ 9.947875917 , 3.44538474085 , 12.4565280762 ],

[ 16.3248996139 , 10.11529850965 , 12.4595283356 ],

[ 8.6783398986 , 10.09710907935 , 12.4635280457 ],

[ 17.5960196853 , 3.46613073355 , 12.4665283051 ],

[ 7.4027771354 , 3.45624375345 , 12.4695285645 ],

[ 18.8733691573 , 10.10107827185 , 12.4715274658 ],

[ 6.1242699027 , 10.09066891675 , 12.4725288239 ],

[ 4.8411001563 , 7.87766051295 , 12.4795287933 ],

[ 9.9422063232 , 7.89178586005 , 12.4795287933 ],

[ 20.1558493972 , 3.46966171265 , 12.480528244 ],

[ 20.1448783279 , 7.89063763625 , 12.4815276947 ],

[ 3.5783550143 , 10.08351826675 , 12.4835285034 ],

[ 21.4328498244 , 5.67675185205 , 12.4845279541 ],

[ 1.0319309831 , 10.08924889565 , 12.4845279541 ],

[ 4.8559951186 , 3.46613073355 , 12.4865287628 ],

[ 2.3037478328 , 7.88110375405 , 12.4875282135 ],

[ 3.5876440406 , 5.67321991925 , 12.4885276642 ],

[ 22.6995696425 , 3.47213363655 , 12.4895290222 ],

[ 6.1311640143 , 5.66333270075 , 12.4895290222 ],

[ 11.2323693633 , 5.64161562925 , 12.4905284729 ],

[ 15.0495786071 , 7.92506670955 , 12.4905284729 ],

[ 16.3312396407 , 5.66633391385 , 12.4955276337 ],

[ 12.4942387939 , 7.92612671855 , 12.4975284424 ],

[ 7.3850778937 , 7.88640093805 , 12.5115283813 ],

[ 13.782109201 , 5.64143872265 , 12.5155280914 ],

[ 18.8853091598 , 5.66854071625 , 12.5215286102 ],

[ 12.9113587737 , 8.13729310035 , 14.6945289459 ],

[ 13.0834893584 , 5.30659270285 , 14.7055286255 ],

[ 14.2906188369 , 6.06438851355 , 14.7895282593 ],

[ 14.2116689086 , 7.51756691935 , 14.8045276489 ],

[ 11.7043790221 , 7.37817263605 , 14.8075279083 ],

[ 11.7805384994 , 5.92631888395 , 14.8165286865 ],

[ 15.5819491744 , 5.43795371055 , 14.8685287323 ],

[ 13.1451587081 , 4.23010659225 , 14.8795284119 ],

[ 10.417589128 , 8.00381302835 , 14.8825286713 ],

[ 12.8526391387 , 9.21148419385 , 14.8825286713 ],

[ 15.3983086944 , 8.28154206275 , 14.9235290375 ],

[ 15.6352185607 , 4.35131478315 , 14.9445289459 ],

[ 10.3650893569 , 9.09159970285 , 14.948528656 ],

[ 10.596439302 , 5.16322684295 , 14.9615272369 ],

[ 15.3206786513 , 9.36659169205 , 15.012527832 ],

[ 16.7231788039 , 6.23574090005 , 15.0285285797 ],

[ 10.6747292876 , 4.07702851295 , 15.0385288086 ],

[ 9.2784489989 , 7.20770382885 , 15.0655273285 ],

[ 18.5574797988 , 5.63216996195 , 15.0765289154 ],

[ 7.4520000815 , 7.82098460205 , 15.0765289154 ],

[ 16.6632880569 , 7.65307688715 , 15.0855277863 ],

[ 9.33115381 , 5.79116177565 , 15.1165279236 ],

[ 17.938159883 , 8.30096364025 , 15.2335285034 ],

[ 8.0496606231 , 5.14910197265 , 15.2535289612 ],

[ 6.9623531699 , 5.97760987285 , 15.2735275116 ],

[ 19.0282687545 , 7.47607493405 , 15.2755283203 ],

[ 18.033359468 , 9.38680768015 , 15.2845290985 ],

[ 7.9491547942 , 4.06396365165 , 15.3125289764 ],

[ 20.0781096816 , 7.74285674095 , 15.3655284729 ],

[ 5.9118980765 , 5.71859574325 , 15.3735278931 ],

[ 11.9247 , 8.888759960267, 18.4203265991 ],

[ 11.9247 , 7.081409801567, 20.2276767578 ],

[ 10.1173498413 , 8.888759960267, 20.2276767578 ],

[ 13.7320501587 , 8.888759960267, 20.2276767578 ],

[ 11.9247 , 10.696110118967, 20.2276767578 ],

[ 11.9247 , 5.274059881267, 22.0350269165 ],

[ 10.1173498413 , 7.081409801567, 22.0350269165 ],

[ 13.7320501587 , 7.081409801567, 22.0350269165 ],

[ 11.9247 , 8.888759960267, 22.0350269165 ],

[ 10.1173498413 , 10.696110118967, 22.0350269165 ],

[ 13.7320501587 , 10.696110118967, 22.0350269165 ],

[ 11.9247 , 12.503460277667, 22.0350269165 ],

[ 10.1173498413 , 5.274059881267, 23.8423770752 ],

[ 13.7320501587 , 5.274059881267, 23.8423770752 ],

[ 11.9247 , 7.081409801567, 23.8423770752 ],

[ 10.1173498413 , 8.888759960267, 23.8423770752 ],

[ 13.7320501587 , 8.888759960267, 23.8423770752 ],

[ 11.9247 , 10.696110118967, 23.8423770752 ],

[ 10.1173498413 , 12.503460277667, 23.8423770752 ],

[ 13.7320501587 , 12.503460277667, 23.8423770752 ],

[ 11.9247 , 5.274059881267, 25.6497272339 ],

[ 10.1173498413 , 7.081409801567, 25.6497272339 ],

[ 13.7320501587 , 7.081409801567, 25.6497272339 ],

[ 11.9247 , 8.888759960267, 25.6497272339 ],

[ 10.1173498413 , 10.696110118967, 25.6497272339 ],

[ 13.7320501587 , 10.696110118967, 25.6497272339 ],

[ 11.9247 , 12.503460277667, 25.6497272339 ],

[ 10.1173498413 , 5.274059881267, 27.4570773926 ],

[ 13.7320501587 , 5.274059881267, 27.4570773926 ],

[ 11.9247 , 7.081409801567, 27.4570773926 ],

[ 10.1173498413 , 8.888759960267, 27.4570773926 ],

[ 13.7320501587 , 8.888759960267, 27.4570773926 ],

[ 11.9247 , 10.696110118967, 27.4570773926 ],

[ 10.1173498413 , 12.503460277667, 27.4570773926 ],

[ 13.7320501587 , 12.503460277667, 27.4570773926 ],

[ 11.9247 , 5.274059881267, 29.2644275513 ],

[ 10.1173498413 , 7.081409801567, 29.2644275513 ],

[ 13.7320501587 , 7.081409801567, 29.2644275513 ],

[ 11.9247 , 8.888759960267, 29.2644275513 ],

[ 10.1173498413 , 10.696110118967, 29.2644275513 ],

[ 13.7320501587 , 10.696110118967, 29.2644275513 ],

[ 11.9247 , 12.503460277667, 29.2644275513 ]]*Angstrom

# Set up configuration

central_region = BulkConfiguration(

bravais_lattice=central_region_lattice,

elements=central_region_elements,

cartesian_coordinates=central_region_coordinates

)

device_configuration = DeviceConfiguration(

central_region,

[left_electrode, right_electrode],

equivalent_electrode_lengths=[7.22940064, 7.2293930054]*Angstrom,

transverse_electrode_repetitions=[[1, 1], [1, 1]],

)

# -------------------------------------------------------------

# Calculator

# -------------------------------------------------------------

#----------------------------------------

# Basis Set

#----------------------------------------

basis_set = [

GGABasis.Hydrogen_DoubleZetaPolarized,

GGABasis.Carbon_DoubleZetaPolarized,

GGABasis.Copper_DoubleZetaPolarized,

GGABasis.Selenium_DoubleZetaPolarized,

]

#----------------------------------------

# Numerical Accuracy Settings

#----------------------------------------

device_k_point_sampling = MonkhorstPackGrid(

na=2,

nc=261,

)

device_numerical_accuracy_parameters = NumericalAccuracyParameters(

density_mesh_cutoff=100.0*Hartree,

k_point_sampling=device_k_point_sampling,

)

#----------------------------------------

# Contour Integral Settings

#----------------------------------------

equilibrium_contour = SemiCircleContour(

integral_lower_bound=1.84481605655*Hartree,

circle_points=30,

)

contour_parameters = ContourParameters(

equilibrium_contour=equilibrium_contour,

)

#----------------------------------------

# Device Calculator

#----------------------------------------

calculator = DeviceLCAOCalculator(

basis_set=basis_set,

numerical_accuracy_parameters=device_numerical_accuracy_parameters,

contour_parameters=contour_parameters,

)

device_configuration.setCalculator(calculator)

nlprint(device_configuration)

nlsave('chem-Cu-ADS-Cu-b1-012-012.hdf5', device_configuration)

# -------------------------------------------------------------

# IV Characteristics

# -------------------------------------------------------------

# Kpoint sampling

kpoint_grid = MonkhorstPackGrid(

na=2,

)

# Gate-source voltages

gate_source_voltages = numpy.linspace(0, 0, 1)*Volt

# Drain-source voltages

drain_source_voltages = numpy.linspace(-0.12, 0.12, 7)*Volt

# File name.

filename = 'chem-Cu-ADS-Cu-b1-012-012.hdf5'

iv_characteristics = IVCharacteristics(

configuration=device_configuration,

filename=filename,

object_id='ivcharacteristics',

gate_regions=[],

gate_source_voltages=gate_source_voltages,

drain_source_voltages=drain_source_voltages,

energies=numpy.linspace(-2, 2, 201)*eV,

kpoints=kpoint_grid,

self_energy_calculator=RecursionSelfEnergy(),

energy_zero_parameter=AverageFermiLevel,

infinitesimal=1e-06*eV,

log_filename_prefix='ivcharacteristics_',

number_of_processes_per_task=None,

enforce_zero_transmission_in_band_gap=True,

)

iv_characteristics.update()

**phys-Cu-ADS-Cu-*b*2.py**

# -*- coding: utf-8 -*-

# -------------------------------------------------------------

# Two-probe Configuration

# -------------------------------------------------------------

# -------------------------------------------------------------

# Left Electrode

# -------------------------------------------------------------

# Set up lattice

vector_a = [25.0, 0.0, 0.0]*Angstrom

vector_b = [0.0, 15.0, 0.0]*Angstrom

vector_c = [0.0, 0.0, 3.61470032]*Angstrom

left_electrode_lattice = UnitCell(vector_a, vector_b, vector_c)

# Define elements

left_electrode_elements = [Copper, Copper, Copper, Copper, Copper, Copper, Copper, Copper,

Copper, Copper, Copper, Copper, Copper, Copper, Copper]

# Define coordinates

left_electrode_coordinates = [[ 10.6926501976, 3.8852998008, 0.9035754 ],

[ 14.3073505176, 3.8852998008, 0.9035754 ],

[ 12.5000003576, 5.6926497208, 0.9035754 ],

[ 10.6926501976, 7.4999998808, 0.9035754 ],

[ 14.3073505176, 7.4999998808, 0.9035754 ],

[ 12.5000003576, 9.3073500408, 0.9035754 ],

[ 10.6926501976, 11.1147002008, 0.9035754 ],

[ 14.3073505176, 11.1147002008, 0.9035754 ],

[ 12.5000003576, 3.8852998008, 2.71092556 ],

[ 10.6926501976, 5.6926497208, 2.71092556 ],

[ 14.3073505176, 5.6926497208, 2.71092556 ],

[ 12.5000003576, 7.4999998808, 2.71092556 ],

[ 10.6926501976, 9.3073500408, 2.71092556 ],

[ 14.3073505176, 9.3073500408, 2.71092556 ],

[ 12.5000003576, 11.1147002008, 2.71092556 ]]*Angstrom

# Set up configuration

left_electrode = BulkConfiguration(

bravais_lattice=left_electrode_lattice,

elements=left_electrode_elements,

cartesian_coordinates=left_electrode_coordinates

)

# -------------------------------------------------------------

# Right Electrode

# -------------------------------------------------------------

# Set up lattice

vector_a = [25.0, 0.0, 0.0]*Angstrom

vector_b = [0.0, 15.0, 0.0]*Angstrom

vector_c = [0.0, 0.0, 3.6146965027]*Angstrom

right_electrode_lattice = UnitCell(vector_a, vector_b, vector_c)

# Define elements

right_electrode_elements = [Copper, Copper, Copper, Copper, Copper, Copper, Copper, Copper,

Copper, Copper, Copper, Copper, Copper, Copper, Copper]

# Define coordinates

right_electrode_coordinates = [[ 9.4229498413 , 4.301929881267, 0.9037728546 ],

[ 13.0376501587 , 4.301929881267, 0.9037728546 ],

[ 11.2303 , 6.109279801567, 0.9037728546 ],

[ 9.4229498413 , 7.916629960267, 0.9037728546 ],

[ 13.0376501587 , 7.916629960267, 0.9037728546 ],

[ 11.2303 , 9.723980118967, 0.9037728546 ],

[ 9.4229498413 , 11.531330277667, 0.9037728546 ],

[ 13.0376501587 , 11.531330277667, 0.9037728546 ],

[ 11.2303 , 4.301929881267, 2.7111230133 ],

[ 9.4229498413 , 6.109279801567, 2.7111230133 ],

[ 13.0376501587 , 6.109279801567, 2.7111230133 ],

[ 11.2303 , 7.916629960267, 2.7111230133 ],

[ 9.4229498413 , 9.723980118967, 2.7111230133 ],

[ 13.0376501587 , 9.723980118967, 2.7111230133 ],

[ 11.2303 , 11.531330277667, 2.7111230133 ]]*Angstrom

# Set up configuration

right_electrode = BulkConfiguration(

bravais_lattice=right_electrode_lattice,

elements=right_electrode_elements,

cartesian_coordinates=right_electrode_coordinates

)

# -------------------------------------------------------------

# Central Region

# -------------------------------------------------------------

# Set up lattice

vector_a = [25.0, 0.0, 0.0]*Angstrom

vector_b = [0.0, 15.0, 0.0]*Angstrom

vector_c = [0.0, 0.0, 30.167997226]*Angstrom

central_region_lattice = UnitCell(vector_a, vector_b, vector_c)

# Define elements

central_region_elements = [Copper, Copper, Copper, Copper, Copper, Copper, Copper, Copper,

Copper, Copper, Copper, Copper, Copper, Copper, Copper, Copper,

Copper, Copper, Copper, Copper, Copper, Copper, Copper, Copper,

Copper, Copper, Copper, Copper, Copper, Copper, Copper, Copper,

Copper, Copper, Copper, Copper, Copper, Copper, Copper, Copper,

Copper, Copper, Copper, Copper, Copper, Copper, Copper, Copper,

Copper, Copper, Copper, Copper, Copper, Copper, Copper, Copper,

Copper, Copper, Copper, Copper, Copper, Copper, Copper, Copper,

Copper, Copper, Copper, Copper, Copper, Copper, Copper, Copper,

Copper, Copper, Copper, Copper, Copper, Copper, Copper, Copper,

Copper, Copper, Copper, Copper, Copper, Copper, Copper, Copper,

Copper, Copper, Copper, Copper, Copper, Copper, Copper, Copper,

Copper, Copper, Copper, Copper, Copper, Copper, Copper, Copper,

Copper, Copper, Copper, Copper, Copper, Copper, Copper, Copper,

Copper, Copper, Copper, Copper, Copper, Copper, Copper, Copper,

Copper, Copper, Copper, Copper, Copper, Copper, Hydrogen, Hydrogen,

Hydrogen, Hydrogen, Carbon, Carbon, Hydrogen, Selenium, Hydrogen,

Carbon, Selenium, Hydrogen, Carbon, Hydrogen, Hydrogen, Carbon,

Hydrogen, Carbon, Carbon, Carbon, Carbon, Carbon, Carbon, Carbon,

Carbon, Carbon, Carbon, Carbon, Carbon, Carbon, Copper, Copper,

Copper, Copper, Copper, Copper, Copper, Copper, Copper, Copper,

Copper, Copper, Copper, Copper, Copper, Copper, Copper, Copper,

Copper, Copper, Copper, Copper, Copper, Copper, Copper, Copper,

Copper, Copper, Copper, Copper, Copper, Copper, Copper, Copper,

Copper, Copper, Copper, Copper, Copper, Copper, Copper, Copper]

# Define coordinates

central_region_coordinates = [[ 10.6926501976 , 3.8852998008 , 0.9035754 ],

[ 14.3073505176 , 3.8852998008 , 0.9035754 ],

[ 12.5000003576 , 5.6926497208 , 0.9035754 ],

[ 10.6926501976 , 7.4999998808 , 0.9035754 ],

[ 14.3073505176 , 7.4999998808 , 0.9035754 ],

[ 12.5000003576 , 9.3073500408 , 0.9035754 ],

[ 10.6926501976 , 11.1147002008 , 0.9035754 ],

[ 14.3073505176 , 11.1147002008 , 0.9035754 ],

[ 12.5000003576 , 3.8852998008 , 2.71092556 ],

[ 10.6926501976 , 5.6926497208 , 2.71092556 ],

[ 14.3073505176 , 5.6926497208 , 2.71092556 ],

[ 12.5000003576 , 7.4999998808 , 2.71092556 ],

[ 10.6926501976 , 9.3073500408 , 2.71092556 ],

[ 14.3073505176 , 9.3073500408 , 2.71092556 ],

[ 12.5000003576 , 11.1147002008 , 2.71092556 ],

[ 10.6926501976 , 3.8852998008 , 4.51827571 ],

[ 14.3073505176 , 3.8852998008 , 4.51827571 ],

[ 12.5000003576 , 5.6926497208 , 4.51827571 ],

[ 10.6926501976 , 7.4999998808 , 4.51827571 ],

[ 14.3073505176 , 7.4999998808 , 4.51827571 ],

[ 12.5000003576 , 9.3073500408 , 4.51827571 ],

[ 10.6926501976 , 11.1147002008 , 4.51827571 ],

[ 14.3073505176 , 11.1147002008 , 4.51827571 ],

[ 12.5000003576 , 3.8852998008 , 6.32562587 ],

[ 10.6926501976 , 5.6926497208 , 6.32562587 ],

[ 14.3073505176 , 5.6926497208 , 6.32562587 ],

[ 12.5000003576 , 7.4999998808 , 6.32562587 ],

[ 10.6926501976 , 9.3073500408 , 6.32562587 ],

[ 14.3073505176 , 9.3073500408 , 6.32562587 ],

[ 12.5000003576 , 11.1147002008 , 6.32562587 ],

[ 17.5967715978 , 9.3386067152 , 8.3295234528 ],

[ 12.4982122183 , 9.338783145 , 8.3295234528 ],

[ 15.0474427938 , 9.338783145 , 8.3295234528 ],

[ 7.4022172689 , 4.92195642 , 8.3305248108 ],

[ 8.6758559942 , 7.1302813292 , 8.3305248108 ],

[ 16.3218616247 , 7.1303704977 , 8.3305248108 ],

[ 11.2250322103 , 7.1307233572 , 8.3305248108 ],

[ 13.7725824117 , 7.1308115721 , 8.3305248108 ],

[ 7.4001153707 , 9.337459445 , 8.3305248108 ],

[ 9.9483741522 , 9.3377236128 , 8.3305248108 ],

[ 9.9506295919 , 4.9216035605 , 8.3315242615 ],

[ 18.8701728582 , 7.1298402548 , 8.3315242615 ],

[ 6.1271384954 , 7.1308115721 , 8.3315242615 ],

[ 2.3052273988 , 9.3372820616 , 8.3315242615 ],

[ 20.1456416845 , 9.3378123045 , 8.3315242615 ],

[ 12.4977124929 , 4.9221333265 , 8.3325237122 ],

[ 15.0472024679 , 4.923104167 , 8.3325237122 ],

[ 17.5956119299 , 4.9234575033 , 8.3325237122 ],

[ 1.0317283869 , 11.5441082716 , 8.3325237122 ],

[ 4.8536013365 , 4.9226626158 , 8.3335250702 ],

[ 4.8526204824 , 9.3372820616 , 8.3335250702 ],

[ 18.8703616857 , 11.5448979139 , 8.3335250702 ],

[ 16.3215926885 , 11.5455187559 , 8.3335250702 ],

[ 22.6925929784 , 4.9235452414 , 8.3345245209 ],

[ 3.5791333914 , 7.1301053763 , 8.3345245209 ],

[ 8.6743663549 , 11.5436686277 , 8.3345245209 ],

[ 11.2236922979 , 11.5448979139 , 8.3345245209 ],

[ 20.1432632208 , 4.9233692885 , 8.3355239716 ],

[ 3.5811084509 , 11.5424288511 , 8.3355239716 ],

[ 6.1270755529 , 11.5431383848 , 8.3355239716 ],

[ 13.7718518972 , 11.5467585325 , 8.3355239716 ],

[ 21.4163917303 , 7.1290453673 , 8.3365234222 ],

[ 16.3254722357 , 8.6050871611 , 10.3975204315 ],

[ 7.4034365415 , 6.3877586126 , 10.3985198822 ],

[ 18.8768924474 , 8.6034106016 , 10.3985198822 ],

[ 13.7747119665 , 8.6052645445 , 10.3985198822 ],

[ 9.9537853002 , 6.3889945746 , 10.3995193329 ],

[ 11.2250322103 , 8.6035870314 , 10.3995193329 ],

[ 8.6741193533 , 8.6019095183 , 10.4005206909 ],

[ 15.0479120016 , 6.3922604323 , 10.4025195923 ],

[ 12.5008720159 , 6.3902305365 , 10.4035209503 ],

[ 4.8547695875 , 6.3913773298 , 10.4055198517 ],

[ 17.5979522466 , 6.3919075728 , 10.4055198517 ],

[ 6.124993205 , 8.6024397612 , 10.4055198517 ],

[ 8.6783117056 , 4.1820815802 , 10.4065193024 ],

[ 21.4235728979 , 8.6018217802 , 10.4065193024 ],

[ 17.5978416204 , 10.8099688292 , 10.4065193024 ],

[ 15.0470327139 , 10.8105887175 , 10.4065193024 ],

[ 6.1300524473 , 4.1825236082 , 10.4075206604 ],

[ 13.77498281 , 4.1855243445 , 10.4075206604 ],

[ 9.9520400762 , 10.808118701 , 10.4075206604 ],

[ 20.1480315923 , 10.8086479902 , 10.4075206604 ],

[ 16.3233932256 , 4.1862305403 , 10.4085201111 ],

[ 3.5769883394 , 8.6006735563 , 10.4085201111 ],

[ 2.3083823919 , 10.8060883284 , 10.4085201111 ],

[ 12.4992822408 , 10.8076781035 , 10.4085201111 ],

[ 11.226362586 , 4.1837595701 , 10.4095195618 ],

[ 23.9682716131 , 4.1861423254 , 10.4105209198 ],

[ 21.4196132421 , 4.1876434088 , 10.4105209198 ],

[ 22.6926330328 , 6.3927901983 , 10.4115203705 ],

[ 7.401640296 , 10.8059080839 , 10.4115203705 ],

[ 18.8695625066 , 4.1894096136 , 10.4155200806 ],

[ 20.1413730383 , 6.3917301893 , 10.4155200806 ],

[ 4.8580693006 , 10.8042286635 , 10.4165195312 ],

[ 17.6028426885 , 7.8792494536 , 12.4435199585 ],

[ 7.4003232717 , 7.8543542624 , 12.4455207672 ],

[ 15.0510619878 , 7.8713043928 , 12.4475196686 ],

[ 9.9517930746 , 7.8621233702 , 12.4485210266 ],

[ 12.5014823675 , 7.8676842451 , 12.4485210266 ],

[ 8.68472898 , 5.6544164419 , 12.4695209351 ],

[ 16.3181327581 , 10.0786579847 , 12.4715198364 ],

[ 16.315292716 , 5.6593593359 , 12.4725192871 ],

[ 4.850279212 , 7.8617705107 , 12.4725192871 ],

[ 20.1516631841 , 7.8707741499 , 12.4725192871 ],

[ 6.1308635473 , 5.6543272734 , 12.4735206451 ],

[ 8.6862453222 , 10.0728281736 , 12.4745200958 ],

[ 18.8722518682 , 10.0786579847 , 12.4745200958 ],

[ 11.2296222448 , 5.6594485045 , 12.4775203552 ],

[ 13.7753823995 , 5.6615666151 , 12.4795192566 ],

[ 13.7727721929 , 10.0747784376 , 12.4795192566 ],

[ 11.2267020941 , 10.0721281767 , 12.4815200653 ],

[ 12.5062822103 , 3.4577444792 , 12.4845203247 ],

[ 7.4079812765 , 3.4532414675 , 12.4855197754 ],

[ 17.5894016027 , 3.4532414675 , 12.4865211334 ],

[ 22.6909126043 , 3.4532414675 , 12.4865211334 ],

[ 1.0334143638 , 10.0746887922 , 12.4865211334 ],

[ 3.581941247 , 5.6576822996 , 12.4875205841 ],

[ 15.0485318899 , 3.4532414675 , 12.4895194855 ],

[ 20.1410716772 , 3.4532414675 , 12.4895194855 ],

[ 9.9574121237 , 3.453594327 , 12.4895194855 ],

[ 4.855898261 , 3.4532414675 , 12.4905208435 ],

[ 3.5851904154 , 10.0723885298 , 12.4915202942 ],

[ 21.4170516729 , 5.6589182615 , 12.4925197449 ],

[ 2.3069642782 , 7.8663605452 , 12.4925197449 ],

[ 18.8651832342 , 5.6610373259 , 12.5005210724 ],

[ 6.1369675398 , 10.0718582869 , 12.5005210724 ],

[ 19.5994724035 , 8.3293017149 , 15.2635196533 ],

[ 5.3906463384 , 7.4332584143 , 15.2665199127 ],

[ 7.266028285 , 5.6183093786 , 15.3015197601 ],

[ 17.7235816717 , 10.1437186003 , 15.311519989 ],

[ 18.5279124975 , 8.1502693892 , 15.3155196991 ],

[ 6.4621514082 , 7.6120256186 , 15.3175205078 ],

[ 9.9774373769 , 5.4150885344 , 15.3295196381 ],

[ 17.8968318701 , 6.3442362547 , 15.3355201569 ],

[ 12.4450124502 , 5.3792475462 , 15.3395198669 ],

[ 7.4641383886 , 6.6904705763 , 15.3395198669 ],

[ 7.0937441587 , 9.4175289869 , 15.3415206757 ],

[ 15.0124725103 , 10.3460587263 , 15.3415206757 ],

[ 17.5255721807 , 9.0713833571 , 15.3455203857 ],

[ 14.9114221334 , 5.3143614531 , 15.3505195465 ],

[ 12.5454124212 , 10.3817280531 , 15.3515209045 ],

[ 9.9966491461 , 6.5061415434 , 15.3605197754 ],

[ 10.0795120001 , 10.4467886686 , 15.3625205841 ],

[ 12.467642188 , 6.4707411528 , 15.3665202942 ],

[ 14.993522048 , 9.2549170256 , 15.3675197449 ],

[ 12.5226320028 , 9.2901400328 , 15.3735202637 ],

[ 14.9397023916 , 6.4045313597 , 15.3805202332 ],

[ 11.2498019933 , 7.1785701513 , 15.386520752 ],

[ 8.8035310507 , 7.2244762182 , 15.386520752 ],

[ 10.0510219335 , 9.3566149473 , 15.386520752 ],

[ 16.1864818334 , 8.5368469954 , 15.3895210114 ],

[ 13.7406724691 , 8.582311511 , 15.3895210114 ],

[ 13.7089723348 , 7.1293982267 , 15.3915199127 ],

[ 11.2813028097 , 8.6314829588 , 15.3945201721 ],

[ 16.1298621893 , 7.0992072821 , 15.4015201416 ],

[ 8.8606122732 , 8.6620281935 , 15.4035209503 ],

[ 11.2303 , 7.916629960267, 18.4203265991 ],

[ 11.2303 , 6.109279801567, 20.2276767578 ],

[ 9.4229498413 , 7.916629960267, 20.2276767578 ],

[ 13.0376501587 , 7.916629960267, 20.2276767578 ],

[ 11.2303 , 9.723980118967, 20.2276767578 ],

[ 11.2303 , 4.301929881267, 22.0350269165 ],

[ 9.4229498413 , 6.109279801567, 22.0350269165 ],

[ 13.0376501587 , 6.109279801567, 22.0350269165 ],

[ 11.2303 , 7.916629960267, 22.0350269165 ],

[ 9.4229498413 , 9.723980118967, 22.0350269165 ],

[ 13.0376501587 , 9.723980118967, 22.0350269165 ],

[ 11.2303 , 11.531330277667, 22.0350269165 ],

[ 9.4229498413 , 4.301929881267, 23.8423770752 ],

[ 13.0376501587 , 4.301929881267, 23.8423770752 ],

[ 11.2303 , 6.109279801567, 23.8423770752 ],

[ 9.4229498413 , 7.916629960267, 23.8423770752 ],

[ 13.0376501587 , 7.916629960267, 23.8423770752 ],

[ 11.2303 , 9.723980118967, 23.8423770752 ],

[ 9.4229498413 , 11.531330277667, 23.8423770752 ],

[ 13.0376501587 , 11.531330277667, 23.8423770752 ],

[ 11.2303 , 4.301929881267, 25.6497272339 ],

[ 9.4229498413 , 6.109279801567, 25.6497272339 ],

[ 13.0376501587 , 6.109279801567, 25.6497272339 ],

[ 11.2303 , 7.916629960267, 25.6497272339 ],

[ 9.4229498413 , 9.723980118967, 25.6497272339 ],

[ 13.0376501587 , 9.723980118967, 25.6497272339 ],

[ 11.2303 , 11.531330277667, 25.6497272339 ],

[ 9.4229498413 , 4.301929881267, 27.4570773926 ],

[ 13.0376501587 , 4.301929881267, 27.4570773926 ],

[ 11.2303 , 6.109279801567, 27.4570773926 ],

[ 9.4229498413 , 7.916629960267, 27.4570773926 ],

[ 13.0376501587 , 7.916629960267, 27.4570773926 ],

[ 11.2303 , 9.723980118967, 27.4570773926 ],

[ 9.4229498413 , 11.531330277667, 27.4570773926 ],

[ 13.0376501587 , 11.531330277667, 27.4570773926 ],

[ 11.2303 , 4.301929881267, 29.2644275513 ],

[ 9.4229498413 , 6.109279801567, 29.2644275513 ],

[ 13.0376501587 , 6.109279801567, 29.2644275513 ],

[ 11.2303 , 7.916629960267, 29.2644275513 ],

[ 9.4229498413 , 9.723980118967, 29.2644275513 ],

[ 13.0376501587 , 9.723980118967, 29.2644275513 ],

[ 11.2303 , 11.531330277667, 29.2644275513 ]]*Angstrom

# Set up configuration

central_region = BulkConfiguration(

bravais_lattice=central_region_lattice,

elements=central_region_elements,

cartesian_coordinates=central_region_coordinates

)

device_configuration = DeviceConfiguration(

central_region,

[left_electrode, right_electrode],

equivalent_electrode_lengths=[7.22940064, 7.2293930054]*Angstrom,

transverse_electrode_repetitions=[[1, 1], [1, 1]],

)

# -------------------------------------------------------------

# Calculator

# -------------------------------------------------------------

#----------------------------------------

# Basis Set

#----------------------------------------

basis_set = [

GGABasis.Hydrogen_DoubleZetaPolarized,

GGABasis.Carbon_DoubleZetaPolarized,

GGABasis.Copper_DoubleZetaPolarized,

GGABasis.Selenium_DoubleZetaPolarized,

]

#----------------------------------------

# Numerical Accuracy Settings

#----------------------------------------

device_k_point_sampling = MonkhorstPackGrid(

na=2,

nc=261,

)

device_numerical_accuracy_parameters = NumericalAccuracyParameters(

density_mesh_cutoff=100.0*Hartree,

k_point_sampling=device_k_point_sampling,

)

#----------------------------------------

# Contour Integral Settings

#----------------------------------------

equilibrium_contour = SemiCircleContour(

integral_lower_bound=1.84481605655*Hartree,

circle_points=30,

)

contour_parameters = ContourParameters(

equilibrium_contour=equilibrium_contour,

)

#----------------------------------------

# Device Calculator

#----------------------------------------

calculator = DeviceLCAOCalculator(

basis_set=basis_set,

numerical_accuracy_parameters=device_numerical_accuracy_parameters,

contour_parameters=contour_parameters,

)

device_configuration.setCalculator(calculator)

nlprint(device_configuration)

nlsave('Re-phy-Cu-ADS-Cu-b2-012-012.hdf5', device_configuration)

# -------------------------------------------------------------

# IV Characteristics

# -------------------------------------------------------------

# Kpoint sampling

kpoint_grid = MonkhorstPackGrid(

na=2,

)

# Gate-source voltages

gate_source_voltages = numpy.linspace(0, 0, 1)*Volt

# Drain-source voltages

drain_source_voltages = numpy.linspace(-0.12, 0.12, 3)*Volt

# File name.

filename = 'Re-phy-Cu-ADS-Cu-b2-012-012.hdf5'

iv_characteristics = IVCharacteristics(

configuration=device_configuration,

filename=filename,

object_id='ivcharacteristics',

gate_regions=[],

gate_source_voltages=gate_source_voltages,

drain_source_voltages=drain_source_voltages,

energies=None,

kpoints=kpoint_grid,

self_energy_calculator=RecursionSelfEnergy(),

energy_zero_parameter=AverageFermiLevel,

infinitesimal=1e-06*eV,

log_filename_prefix='ivcharacteristics_',

number_of_processes_per_task=None,

enforce_zero_transmission_in_band_gap=True,

)

iv_characteristics.update()

**chem-Cu-ADS-Cu-*b*2.py**

# -*- coding: utf-8 -*-

# -------------------------------------------------------------

# Two-probe Configuration

# -------------------------------------------------------------

# -------------------------------------------------------------

# Left Electrode

# -------------------------------------------------------------

# Set up lattice

vector_a = [25.0, 0.0, 0.0]*Angstrom

vector_b = [0.0, 15.0, 0.0]*Angstrom

vector_c = [0.0, 0.0, 3.61470032]*Angstrom

left_electrode_lattice = UnitCell(vector_a, vector_b, vector_c)

# Define elements

left_electrode_elements = [Copper, Copper, Copper, Copper, Copper, Copper, Copper, Copper,

Copper, Copper, Copper, Copper, Copper, Copper, Copper]

# Define coordinates

left_electrode_coordinates = [[ 10.6926496004 , 3.88530015845, 0.9035754 ],

[ 14.3073499204 , 3.88530015845, 0.9035754 ],

[ 12.4999997604 , 5.69265007845, 0.9035754 ],

[ 10.6926496004 , 7.50000023845, 0.9035754 ],

[ 14.3073499204 , 7.50000023845, 0.9035754 ],

[ 12.4999997604 , 9.30735039845, 0.9035754 ],

[ 10.6926496004 , 11.11470055845, 0.9035754 ],

[ 14.3073499204 , 11.11470055845, 0.9035754 ],

[ 12.4999997604 , 3.88530015845, 2.71092556 ],

[ 10.6926496004 , 5.69265007845, 2.71092556 ],

[ 14.3073499204 , 5.69265007845, 2.71092556 ],

[ 12.4999997604 , 7.50000023845, 2.71092556 ],

[ 10.6926496004 , 9.30735039845, 2.71092556 ],

[ 14.3073499204 , 9.30735039845, 2.71092556 ],

[ 12.4999997604 , 11.11470055845, 2.71092556 ]]*Angstrom

# Set up configuration

left_electrode = BulkConfiguration(

bravais_lattice=left_electrode_lattice,

elements=left_electrode_elements,

cartesian_coordinates=left_electrode_coordinates

)

# -------------------------------------------------------------

# Right Electrode

# -------------------------------------------------------------

# Set up lattice

vector_a = [25.0, 0.0, 0.0]*Angstrom

vector_b = [0.0, 15.0, 0.0]*Angstrom

vector_c = [0.0, 0.0, 3.6146965027]*Angstrom

right_electrode_lattice = UnitCell(vector_a, vector_b, vector_c)

# Define elements

right_electrode_elements = [Copper, Copper, Copper, Copper, Copper, Copper, Copper, Copper,

Copper, Copper, Copper, Copper, Copper, Copper, Copper]

# Define coordinates

right_electrode_coordinates = [[ 9.4229498413 , 4.301929881267, 0.9037728546 ],

[ 13.0376501587 , 4.301929881267, 0.9037728546 ],

[ 11.2303 , 6.109279801567, 0.9037728546 ],

[ 9.4229498413 , 7.916629960267, 0.9037728546 ],

[ 13.0376501587 , 7.916629960267, 0.9037728546 ],

[ 11.2303 , 9.723980118967, 0.9037728546 ],

[ 9.4229498413 , 11.531330277667, 0.9037728546 ],

[ 13.0376501587 , 11.531330277667, 0.9037728546 ],

[ 11.2303 , 4.301929881267, 2.7111230133 ],

[ 9.4229498413 , 6.109279801567, 2.7111230133 ],

[ 13.0376501587 , 6.109279801567, 2.7111230133 ],

[ 11.2303 , 7.916629960267, 2.7111230133 ],

[ 9.4229498413 , 9.723980118967, 2.7111230133 ],

[ 13.0376501587 , 9.723980118967, 2.7111230133 ],

[ 11.2303 , 11.531330277667, 2.7111230133 ]]*Angstrom

# Set up configuration

right_electrode = BulkConfiguration(

bravais_lattice=right_electrode_lattice,

elements=right_electrode_elements,

cartesian_coordinates=right_electrode_coordinates

)

# -------------------------------------------------------------

# Central Region

# -------------------------------------------------------------

# Set up lattice

vector_a = [25.0, 0.0, 0.0]*Angstrom

vector_b = [0.0, 15.0, 0.0]*Angstrom

vector_c = [0.0, 0.0, 30.167997226]*Angstrom

central_region_lattice = UnitCell(vector_a, vector_b, vector_c)

# Define elements

central_region_elements = [Copper, Copper, Copper, Copper, Copper, Copper, Copper, Copper,

Copper, Copper, Copper, Copper, Copper, Copper, Copper, Copper,

Copper, Copper, Copper, Copper, Copper, Copper, Copper, Copper,

Copper, Copper, Copper, Copper, Copper, Copper, Copper, Copper,

Copper, Copper, Copper, Copper, Copper, Copper, Copper, Copper,

Copper, Copper, Copper, Copper, Copper, Copper, Copper, Copper,

Copper, Copper, Copper, Copper, Copper, Copper, Copper, Copper,

Copper, Copper, Copper, Copper, Copper, Copper, Copper, Copper,

Copper, Copper, Copper, Copper, Copper, Copper, Copper, Copper,

Copper, Copper, Copper, Copper, Copper, Copper, Copper, Copper,

Copper, Copper, Copper, Copper, Copper, Copper, Copper, Copper,

Copper, Copper, Copper, Copper, Copper, Copper, Copper, Copper,

Copper, Copper, Copper, Copper, Copper, Copper, Copper, Copper,

Copper, Copper, Copper, Copper, Copper, Copper, Copper, Copper,

Copper, Copper, Copper, Copper, Copper, Copper, Copper, Copper,

Copper, Copper, Copper, Copper, Copper, Copper, Carbon, Carbon,

Carbon, Carbon, Carbon, Carbon, Carbon, Hydrogen, Carbon, Hydrogen,

Carbon, Hydrogen, Hydrogen, Carbon, Hydrogen, Carbon, Hydrogen,

Carbon, Selenium, Selenium, Carbon, Carbon, Carbon, Carbon, Carbon,

Carbon, Hydrogen, Hydrogen, Hydrogen, Hydrogen, Copper, Copper,

Copper, Copper, Copper, Copper, Copper, Copper, Copper, Copper,

Copper, Copper, Copper, Copper, Copper, Copper, Copper, Copper,

Copper, Copper, Copper, Copper, Copper, Copper, Copper, Copper,

Copper, Copper, Copper, Copper, Copper, Copper, Copper, Copper,

Copper, Copper, Copper, Copper, Copper, Copper, Copper, Copper]

# Define coordinates

central_region_coordinates = [[ 10.6926496004 , 3.88530015845 , 0.9035754 ],

[ 14.3073499204 , 3.88530015845 , 0.9035754 ],

[ 12.4999997604 , 5.69265007845 , 0.9035754 ],

[ 10.6926496004 , 7.50000023845 , 0.9035754 ],

[ 14.3073499204 , 7.50000023845 , 0.9035754 ],

[ 12.4999997604 , 9.30735039845 , 0.9035754 ],

[ 10.6926496004 , 11.11470055845 , 0.9035754 ],

[ 14.3073499204 , 11.11470055845 , 0.9035754 ],

[ 12.4999997604 , 3.88530015845 , 2.71092556 ],

[ 10.6926496004 , 5.69265007845 , 2.71092556 ],

[ 14.3073499204 , 5.69265007845 , 2.71092556 ],

[ 12.4999997604 , 7.50000023845 , 2.71092556 ],

[ 10.6926496004 , 9.30735039845 , 2.71092556 ],

[ 14.3073499204 , 9.30735039845 , 2.71092556 ],

[ 12.4999997604 , 11.11470055845 , 2.71092556 ],

[ 10.6926496004 , 3.88530015845 , 4.51827571 ],

[ 14.3073499204 , 3.88530015845 , 4.51827571 ],

[ 12.4999997604 , 5.69265007845 , 4.51827571 ],

[ 10.6926496004 , 7.50000023845 , 4.51827571 ],

[ 14.3073499204 , 7.50000023845 , 4.51827571 ],

[ 12.4999997604 , 9.30735039845 , 4.51827571 ],

[ 10.6926496004 , 11.11470055845 , 4.51827571 ],

[ 14.3073499204 , 11.11470055845 , 4.51827571 ],

[ 12.4999997604 , 3.88530015845 , 6.32562587 ],

[ 10.6926496004 , 5.69265007845 , 6.32562587 ],

[ 14.3073499204 , 5.69265007845 , 6.32562587 ],

[ 12.4999997604 , 7.50000023845 , 6.32562587 ],

[ 10.6926496004 , 9.30735039845 , 6.32562587 ],

[ 14.3073499204 , 9.30735039845 , 6.32562587 ],

[ 12.4999997604 , 11.11470055845 , 6.32562587 ],

[ 3.5799309611 , 11.55716919905 , 8.3275264587 ],

[ 15.0424889922 , 9.34946560865 , 8.3295253601 ],

[ 8.6729840636 , 11.56228852275 , 8.3295253601 ],

[ 11.2219085097 , 11.56317830085 , 8.3295253601 ],

[ 12.4971389175 , 9.34840607645 , 8.3305267181 ],

[ 6.1268658042 , 11.56008839615 , 8.3305267181 ],

[ 7.4030150771 , 9.34725880625 , 8.3315261688 ],

[ 2.3047119975 , 9.34911274915 , 8.3315261688 ],

[ 18.8709697127 , 11.55831837655 , 8.3315261688 ],

[ 13.7716493011 , 11.56228852275 , 8.3315261688 ],

[ 9.9510316253 , 4.93961262705 , 8.3325256195 ],

[ 4.8561820388 , 9.34734654425 , 8.3325256195 ],

[ 17.592489183 , 9.34955334665 , 8.3325256195 ],

[ 20.1437987685 , 9.35052514075 , 8.3325256195 ],

[ 16.3206691146 , 11.55911850935 , 8.3325256195 ],

[ 1.0331498981 , 11.55964875225 , 8.3325256195 ],

[ 9.9480122924 , 9.34611058235 , 8.3335269775 ],

[ 22.6923789382 , 4.93696475035 , 8.3345264282 ],

[ 4.8549208045 , 4.93731760985 , 8.3345264282 ],

[ 7.4022120833 , 4.93996596335 , 8.3345264282 ],

[ 3.5815238357 , 7.14255261425 , 8.3345264282 ],

[ 20.1435584426 , 4.93908381465 , 8.3355258789 ],

[ 17.5950984359 , 4.94058394435 , 8.3355258789 ],

[ 6.1295790076 , 7.14211153985 , 8.3355258789 ],

[ 18.8674086928 , 7.14202284815 , 8.3365253296 ],

[ 12.4989890456 , 4.94323277475 , 8.3375266876 ],

[ 15.0471991897 , 4.94393897055 , 8.3375266876 ],

[ 21.4148597121 , 7.14193463325 , 8.3375266876 ],

[ 8.6792153716 , 7.14105153085 , 8.339525589 ],

[ 11.2287492156 , 7.14193463325 , 8.339525589 ],

[ 16.3195590377 , 7.14069867135 , 8.3435252991 ],

[ 13.7724189162 , 7.14131665235 , 8.3445266571 ],

[ 9.9445418716 , 10.81861901285 , 10.3835281219 ],

[ 12.4942788482 , 10.82444882395 , 10.3865283813 ],

[ 7.3989838958 , 10.81438851355 , 10.3915275421 ],

[ 8.6754521728 , 4.19232296945 , 10.3925289001 ],

[ 15.0467690826 , 10.82656884195 , 10.3935283508 ],

[ 4.85342592 , 10.81367897995 , 10.3955272522 ],

[ 18.8749980331 , 8.61868405345 , 10.4005283203 ],

[ 17.6007880569 , 10.82532906535 , 10.4005283203 ],

[ 2.3080720305 , 10.81685853005 , 10.401527771 ],

[ 11.2252387404 , 4.20123887065 , 10.4035285797 ],

[ 16.3124694228 , 8.61912465095 , 10.4035285797 ],

[ 20.1508292556 , 10.82391858105 , 10.4035285797 ],

[ 3.5782069564 , 8.61162114145 , 10.4045280304 ],

[ 13.7743186355 , 4.20750689505 , 10.4065288391 ],

[ 22.6971186996 , 6.40797495845 , 10.4075282898 ],

[ 6.1288227439 , 4.20088553435 , 10.4085277405 ],

[ 23.9680690169 , 4.20097374915 , 10.4085277405 ],

[ 16.3220691085 , 4.20865464215 , 10.4085277405 ],

[ 21.4198493362 , 8.61426949505 , 10.4085277405 ],

[ 21.420368135 , 4.20397591595 , 10.4095290985 ],

[ 4.8575667739 , 6.40488457685 , 10.4125274506 ],

[ 6.1290659308 , 8.60738396645 , 10.4125274506 ],

[ 11.2245187163 , 8.61117959025 , 10.4125274506 ],

[ 13.7693585753 , 8.61524033545 , 10.4135288086 ],

[ 18.8718585372 , 4.20768380165 , 10.4145282593 ],

[ 8.6706475616 , 8.60508751875 , 10.4185279694 ],

[ 9.9620370269 , 6.40717959405 , 10.4205287781 ],

[ 7.4011368156 , 6.41044688225 , 10.4205287781 ],

[ 20.141158998 , 6.40656256675 , 10.4235290375 ],

[ 17.5994796157 , 6.40444350245 , 10.4285281982 ],

[ 15.0432690978 , 6.41159367565 , 10.4465278473 ],

[ 12.5025491118 , 6.41097664835 , 10.448528656 ],

[ 8.6872720122 , 5.64647078515 , 12.4315284576 ],

[ 17.5970286727 , 7.91191363335 , 12.434528717 ],

[ 12.503269136 , 3.43682169915 , 12.4465278473 ],

[ 13.7715491653 , 10.12773919105 , 12.447527298 ],

[ 15.0574387908 , 3.44732785225 , 12.448528656 ],

[ 11.2188491225 , 10.11361908915 , 12.4495281067 ],

[ 9.947875917 , 3.44538474085 , 12.4565280762 ],

[ 16.3248996139 , 10.11529850965 , 12.4595283356 ],

[ 8.6783398986 , 10.09710907935 , 12.4635280457 ],

[ 17.5960196853 , 3.46613073355 , 12.4665283051 ],

[ 7.4027771354 , 3.45624375345 , 12.4695285645 ],

[ 18.8733691573 , 10.10107827185 , 12.4715274658 ],

[ 6.1242699027 , 10.09066891675 , 12.4725288239 ],

[ 4.8411001563 , 7.87766051295 , 12.4795287933 ],

[ 9.9422063232 , 7.89178586005 , 12.4795287933 ],

[ 20.1558493972 , 3.46966171265 , 12.480528244 ],

[ 20.1448783279 , 7.89063763625 , 12.4815276947 ],

[ 3.5783550143 , 10.08351826675 , 12.4835285034 ],

[ 21.4328498244 , 5.67675185205 , 12.4845279541 ],

[ 1.0319309831 , 10.08924889565 , 12.4845279541 ],

[ 4.8559951186 , 3.46613073355 , 12.4865287628 ],

[ 2.3037478328 , 7.88110375405 , 12.4875282135 ],

[ 3.5876440406 , 5.67321991925 , 12.4885276642 ],

[ 22.6995696425 , 3.47213363655 , 12.4895290222 ],

[ 6.1311640143 , 5.66333270075 , 12.4895290222 ],

[ 11.2323693633 , 5.64161562925 , 12.4905284729 ],

[ 15.0495786071 , 7.92506670955 , 12.4905284729 ],

[ 16.3312396407 , 5.66633391385 , 12.4955276337 ],

[ 12.4942387939 , 7.92612671855 , 12.4975284424 ],

[ 7.3850778937 , 7.88640093805 , 12.5115283813 ],

[ 13.782109201 , 5.64143872265 , 12.5155280914 ],

[ 18.8853091598 , 5.66854071625 , 12.5215286102 ],

[ 12.9113587737 , 8.13729310035 , 14.6945289459 ],

[ 13.0834893584 , 5.30659270285 , 14.7055286255 ],

[ 14.2906188369 , 6.06438851355 , 14.7895282593 ],

[ 14.2116689086 , 7.51756691935 , 14.8045276489 ],

[ 11.7043790221 , 7.37817263605 , 14.8075279083 ],

[ 11.7805384994 , 5.92631888395 , 14.8165286865 ],

[ 15.5819491744 , 5.43795371055 , 14.8685287323 ],

[ 13.1451587081 , 4.23010659225 , 14.8795284119 ],

[ 10.417589128 , 8.00381302835 , 14.8825286713 ],

[ 12.8526391387 , 9.21148419385 , 14.8825286713 ],

[ 15.3983086944 , 8.28154206275 , 14.9235290375 ],

[ 15.6352185607 , 4.35131478315 , 14.9445289459 ],

[ 10.3650893569 , 9.09159970285 , 14.948528656 ],

[ 10.596439302 , 5.16322684295 , 14.9615272369 ],

[ 15.3206786513 , 9.36659169205 , 15.012527832 ],

[ 16.7231788039 , 6.23574090005 , 15.0285285797 ],

[ 10.6747292876 , 4.07702851295 , 15.0385288086 ],

[ 9.2784489989 , 7.20770382885 , 15.0655273285 ],

[ 18.5574797988 , 5.63216996195 , 15.0765289154 ],

[ 7.4520000815 , 7.82098460205 , 15.0765289154 ],

[ 16.6632880569 , 7.65307688715 , 15.0855277863 ],

[ 9.33115381 , 5.79116177565 , 15.1165279236 ],

[ 17.938159883 , 8.30096364025 , 15.2335285034 ],

[ 8.0496606231 , 5.14910197265 , 15.2535289612 ],

[ 6.9623531699 , 5.97760987285 , 15.2735275116 ],

[ 19.0282687545 , 7.47607493405 , 15.2755283203 ],

[ 18.033359468 , 9.38680768015 , 15.2845290985 ],

[ 7.9491547942 , 4.06396365165 , 15.3125289764 ],

[ 20.0781096816 , 7.74285674095 , 15.3655284729 ],

[ 5.9118980765 , 5.71859574325 , 15.3735278931 ],

[ 11.2303 , 7.916629960267, 18.4203265991 ],

[ 11.2303 , 6.109279801567, 20.2276767578 ],

[ 9.4229498413 , 7.916629960267, 20.2276767578 ],

[ 13.0376501587 , 7.916629960267, 20.2276767578 ],

[ 11.2303 , 9.723980118967, 20.2276767578 ],

[ 11.2303 , 4.301929881267, 22.0350269165 ],

[ 9.4229498413 , 6.109279801567, 22.0350269165 ],

[ 13.0376501587 , 6.109279801567, 22.0350269165 ],

[ 11.2303 , 7.916629960267, 22.0350269165 ],

[ 9.4229498413 , 9.723980118967, 22.0350269165 ],

[ 13.0376501587 , 9.723980118967, 22.0350269165 ],

[ 11.2303 , 11.531330277667, 22.0350269165 ],

[ 9.4229498413 , 4.301929881267, 23.8423770752 ],

[ 13.0376501587 , 4.301929881267, 23.8423770752 ],

[ 11.2303 , 6.109279801567, 23.8423770752 ],

[ 9.4229498413 , 7.916629960267, 23.8423770752 ],

[ 13.0376501587 , 7.916629960267, 23.8423770752 ],

[ 11.2303 , 9.723980118967, 23.8423770752 ],

[ 9.4229498413 , 11.531330277667, 23.8423770752 ],

[ 13.0376501587 , 11.531330277667, 23.8423770752 ],

[ 11.2303 , 4.301929881267, 25.6497272339 ],

[ 9.4229498413 , 6.109279801567, 25.6497272339 ],

[ 13.0376501587 , 6.109279801567, 25.6497272339 ],

[ 11.2303 , 7.916629960267, 25.6497272339 ],

[ 9.4229498413 , 9.723980118967, 25.6497272339 ],

[ 13.0376501587 , 9.723980118967, 25.6497272339 ],

[ 11.2303 , 11.531330277667, 25.6497272339 ],

[ 9.4229498413 , 4.301929881267, 27.4570773926 ],

[ 13.0376501587 , 4.301929881267, 27.4570773926 ],

[ 11.2303 , 6.109279801567, 27.4570773926 ],

[ 9.4229498413 , 7.916629960267, 27.4570773926 ],

[ 13.0376501587 , 7.916629960267, 27.4570773926 ],

[ 11.2303 , 9.723980118967, 27.4570773926 ],

[ 9.4229498413 , 11.531330277667, 27.4570773926 ],

[ 13.0376501587 , 11.531330277667, 27.4570773926 ],

[ 11.2303 , 4.301929881267, 29.2644275513 ],

[ 9.4229498413 , 6.109279801567, 29.2644275513 ],

[ 13.0376501587 , 6.109279801567, 29.2644275513 ],

[ 11.2303 , 7.916629960267, 29.2644275513 ],

[ 9.4229498413 , 9.723980118967, 29.2644275513 ],

[ 13.0376501587 , 9.723980118967, 29.2644275513 ],

[ 11.2303 , 11.531330277667, 29.2644275513 ]]*Angstrom

# Set up configuration

central_region = BulkConfiguration(

bravais_lattice=central_region_lattice,

elements=central_region_elements,

cartesian_coordinates=central_region_coordinates

)

device_configuration = DeviceConfiguration(

central_region,

[left_electrode, right_electrode],

equivalent_electrode_lengths=[7.22940064, 7.2293930054]*Angstrom,

transverse_electrode_repetitions=[[1, 1], [1, 1]],

)

# -------------------------------------------------------------

# Calculator

# -------------------------------------------------------------

#----------------------------------------

# Basis Set

#----------------------------------------

basis_set = [

GGABasis.Hydrogen_DoubleZetaPolarized,

GGABasis.Carbon_DoubleZetaPolarized,

GGABasis.Copper_DoubleZetaPolarized,

GGABasis.Selenium_DoubleZetaPolarized,

]

#----------------------------------------

# Numerical Accuracy Settings

#----------------------------------------

device_k_point_sampling = MonkhorstPackGrid(

na=2,

nc=261,

)

device_numerical_accuracy_parameters = NumericalAccuracyParameters(

density_mesh_cutoff=100.0*Hartree,

k_point_sampling=device_k_point_sampling,

)

#----------------------------------------

# Contour Integral Settings

#----------------------------------------

equilibrium_contour = SemiCircleContour(

integral_lower_bound=1.84481605655*Hartree,

circle_points=30,

)

contour_parameters = ContourParameters(

equilibrium_contour=equilibrium_contour,

)

#----------------------------------------

# Device Calculator

#----------------------------------------

calculator = DeviceLCAOCalculator(

basis_set=basis_set,

numerical_accuracy_parameters=device_numerical_accuracy_parameters,

contour_parameters=contour_parameters,

)

device_configuration.setCalculator(calculator)

nlprint(device_configuration)

nlsave('chem-Cu-ADS-Cu-b2-012-012.hdf5', device_configuration)

# -------------------------------------------------------------

# IV Characteristics

# -------------------------------------------------------------

# Kpoint sampling

kpoint_grid = KpointDensity(

density_a=7.0*Angstrom,

density_b=2.38732414638*Angstrom,

density_c=0.0*Angstrom,

)

# Gate-source voltages

gate_source_voltages = numpy.linspace(0, 0, 1)*Volt

# Drain-source voltages

drain_source_voltages = numpy.linspace(-0.12, 0.12, 3)*Volt

# File name.

filename = 'chem-Cu-ADS-Cu-b2-012-012.hdf5'

iv_characteristics = IVCharacteristics(

configuration=device_configuration,

filename=filename,

object_id='ivcharacteristics',

gate_regions=[],

gate_source_voltages=gate_source_voltages,

drain_source_voltages=drain_source_voltages,

energies=None,

kpoints=kpoint_grid,

self_energy_calculator=RecursionSelfEnergy(),

energy_zero_parameter=AverageFermiLevel,

infinitesimal=1e-06*eV,

log_filename_prefix='ivcharacteristics_',

number_of_processes_per_task=None,

enforce_zero_transmission_in_band_gap=True,

)

iv_characteristics.update()

**phys-Cu-ADS-Cu-*b*3.py**

# -*- coding: utf-8 -*-

# -------------------------------------------------------------

# Two-probe Configuration

# -------------------------------------------------------------

# -------------------------------------------------------------

# Left Electrode

# -------------------------------------------------------------

# Set up lattice

vector_a = [25.0, 0.0, 0.0]*Angstrom

vector_b = [0.0, 15.0, 0.0]*Angstrom

vector_c = [0.0, 0.0, 3.61470032]*Angstrom

left_electrode_lattice = UnitCell(vector_a, vector_b, vector_c)

# Define elements

left_electrode_elements = [Copper, Copper, Copper, Copper, Copper, Copper, Copper, Copper,

Copper, Copper, Copper, Copper, Copper, Copper, Copper]

# Define coordinates

left_electrode_coordinates = [[ 10.6926501976, 3.8852998008, 0.9035754 ],

[ 14.3073505176, 3.8852998008, 0.9035754 ],

[ 12.5000003576, 5.6926497208, 0.9035754 ],

[ 10.6926501976, 7.4999998808, 0.9035754 ],

[ 14.3073505176, 7.4999998808, 0.9035754 ],

[ 12.5000003576, 9.3073500408, 0.9035754 ],

[ 10.6926501976, 11.1147002008, 0.9035754 ],

[ 14.3073505176, 11.1147002008, 0.9035754 ],

[ 12.5000003576, 3.8852998008, 2.71092556 ],

[ 10.6926501976, 5.6926497208, 2.71092556 ],

[ 14.3073505176, 5.6926497208, 2.71092556 ],

[ 12.5000003576, 7.4999998808, 2.71092556 ],

[ 10.6926501976, 9.3073500408, 2.71092556 ],

[ 14.3073505176, 9.3073500408, 2.71092556 ],

[ 12.5000003576, 11.1147002008, 2.71092556 ]]*Angstrom

# Set up configuration

left_electrode = BulkConfiguration(

bravais_lattice=left_electrode_lattice,

elements=left_electrode_elements,

cartesian_coordinates=left_electrode_coordinates

)

# -------------------------------------------------------------

# Right Electrode

# -------------------------------------------------------------

# Set up lattice

vector_a = [25.0, 0.0, 0.0]*Angstrom

vector_b = [0.0, 15.0, 0.0]*Angstrom

vector_c = [0.0, 0.0, 3.6146965027]*Angstrom

right_electrode_lattice = UnitCell(vector_a, vector_b, vector_c)

# Define elements

right_electrode_elements = [Copper, Copper, Copper, Copper, Copper, Copper, Copper, Copper,

Copper, Copper, Copper, Copper, Copper, Copper, Copper]

# Define coordinates

right_electrode_coordinates = [[ 10.0974498413 , 3.151239881267, 0.9037728546 ],

[ 13.7121501587 , 3.151239881267, 0.9037728546 ],

[ 11.9048 , 4.958589801567, 0.9037728546 ],

[ 10.0974498413 , 6.765939960267, 0.9037728546 ],

[ 13.7121501587 , 6.765939960267, 0.9037728546 ],

[ 11.9048 , 8.573290118967, 0.9037728546 ],

[ 10.0974498413 , 10.380640277667, 0.9037728546 ],

[ 13.7121501587 , 10.380640277667, 0.9037728546 ],

[ 11.9048 , 3.151239881267, 2.7111230133 ],

[ 10.0974498413 , 4.958589801567, 2.7111230133 ],

[ 13.7121501587 , 4.958589801567, 2.7111230133 ],

[ 11.9048 , 6.765939960267, 2.7111230133 ],

[ 10.0974498413 , 8.573290118967, 2.7111230133 ],

[ 13.7121501587 , 8.573290118967, 2.7111230133 ],

[ 11.9048 , 10.380640277667, 2.7111230133 ]]*Angstrom

# Set up configuration

right_electrode = BulkConfiguration(

bravais_lattice=right_electrode_lattice,

elements=right_electrode_elements,

cartesian_coordinates=right_electrode_coordinates

)

# -------------------------------------------------------------

# Central Region

# -------------------------------------------------------------

# Set up lattice

vector_a = [25.0, 0.0, 0.0]*Angstrom

vector_b = [0.0, 15.0, 0.0]*Angstrom

vector_c = [0.0, 0.0, 30.167997226]*Angstrom

central_region_lattice = UnitCell(vector_a, vector_b, vector_c)

# Define elements

central_region_elements = [Copper, Copper, Copper, Copper, Copper, Copper, Copper, Copper,

Copper, Copper, Copper, Copper, Copper, Copper, Copper, Copper,

Copper, Copper, Copper, Copper, Copper, Copper, Copper, Copper,

Copper, Copper, Copper, Copper, Copper, Copper, Copper, Copper,

Copper, Copper, Copper, Copper, Copper, Copper, Copper, Copper,

Copper, Copper, Copper, Copper, Copper, Copper, Copper, Copper,

Copper, Copper, Copper, Copper, Copper, Copper, Copper, Copper,

Copper, Copper, Copper, Copper, Copper, Copper, Copper, Copper,

Copper, Copper, Copper, Copper, Copper, Copper, Copper, Copper,

Copper, Copper, Copper, Copper, Copper, Copper, Copper, Copper,

Copper, Copper, Copper, Copper, Copper, Copper, Copper, Copper,

Copper, Copper, Copper, Copper, Copper, Copper, Copper, Copper,

Copper, Copper, Copper, Copper, Copper, Copper, Copper, Copper,

Copper, Copper, Copper, Copper, Copper, Copper, Copper, Copper,

Copper, Copper, Copper, Copper, Copper, Copper, Copper, Copper,

Copper, Copper, Copper, Copper, Copper, Copper, Hydrogen, Hydrogen,

Hydrogen, Hydrogen, Carbon, Carbon, Hydrogen, Selenium, Hydrogen,

Carbon, Selenium, Hydrogen, Carbon, Hydrogen, Hydrogen, Carbon,

Hydrogen, Carbon, Carbon, Carbon, Carbon, Carbon, Carbon, Carbon,

Carbon, Carbon, Carbon, Carbon, Carbon, Carbon, Copper, Copper,

Copper, Copper, Copper, Copper, Copper, Copper, Copper, Copper,

Copper, Copper, Copper, Copper, Copper, Copper, Copper, Copper,

Copper, Copper, Copper, Copper, Copper, Copper, Copper, Copper,

Copper, Copper, Copper, Copper, Copper, Copper, Copper, Copper,

Copper, Copper, Copper, Copper, Copper, Copper, Copper, Copper]

# Define coordinates

central_region_coordinates = [[ 10.6926501976 , 3.8852998008 , 0.9035754 ],

[ 14.3073505176 , 3.8852998008 , 0.9035754 ],

[ 12.5000003576 , 5.6926497208 , 0.9035754 ],

[ 10.6926501976 , 7.4999998808 , 0.9035754 ],

[ 14.3073505176 , 7.4999998808 , 0.9035754 ],

[ 12.5000003576 , 9.3073500408 , 0.9035754 ],

[ 10.6926501976 , 11.1147002008 , 0.9035754 ],

[ 14.3073505176 , 11.1147002008 , 0.9035754 ],

[ 12.5000003576 , 3.8852998008 , 2.71092556 ],

[ 10.6926501976 , 5.6926497208 , 2.71092556 ],

[ 14.3073505176 , 5.6926497208 , 2.71092556 ],

[ 12.5000003576 , 7.4999998808 , 2.71092556 ],

[ 10.6926501976 , 9.3073500408 , 2.71092556 ],

[ 14.3073505176 , 9.3073500408 , 2.71092556 ],

[ 12.5000003576 , 11.1147002008 , 2.71092556 ],

[ 10.6926501976 , 3.8852998008 , 4.51827571 ],

[ 14.3073505176 , 3.8852998008 , 4.51827571 ],

[ 12.5000003576 , 5.6926497208 , 4.51827571 ],

[ 10.6926501976 , 7.4999998808 , 4.51827571 ],

[ 14.3073505176 , 7.4999998808 , 4.51827571 ],

[ 12.5000003576 , 9.3073500408 , 4.51827571 ],

[ 10.6926501976 , 11.1147002008 , 4.51827571 ],

[ 14.3073505176 , 11.1147002008 , 4.51827571 ],

[ 12.5000003576 , 3.8852998008 , 6.32562587 ],

[ 10.6926501976 , 5.6926497208 , 6.32562587 ],

[ 14.3073505176 , 5.6926497208 , 6.32562587 ],

[ 12.5000003576 , 7.4999998808 , 6.32562587 ],

[ 10.6926501976 , 9.3073500408 , 6.32562587 ],

[ 14.3073505176 , 9.3073500408 , 6.32562587 ],

[ 12.5000003576 , 11.1147002008 , 6.32562587 ],

[ 17.5967715978 , 9.3386067152 , 8.3295234528 ],

[ 12.4982122183 , 9.338783145 , 8.3295234528 ],

[ 15.0474427938 , 9.338783145 , 8.3295234528 ],

[ 7.4022172689 , 4.92195642 , 8.3305248108 ],

[ 8.6758559942 , 7.1302813292 , 8.3305248108 ],

[ 16.3218616247 , 7.1303704977 , 8.3305248108 ],

[ 11.2250322103 , 7.1307233572 , 8.3305248108 ],

[ 13.7725824117 , 7.1308115721 , 8.3305248108 ],

[ 7.4001153707 , 9.337459445 , 8.3305248108 ],

[ 9.9483741522 , 9.3377236128 , 8.3305248108 ],

[ 9.9506295919 , 4.9216035605 , 8.3315242615 ],

[ 18.8701728582 , 7.1298402548 , 8.3315242615 ],

[ 6.1271384954 , 7.1308115721 , 8.3315242615 ],

[ 2.3052273988 , 9.3372820616 , 8.3315242615 ],

[ 20.1456416845 , 9.3378123045 , 8.3315242615 ],

[ 12.4977124929 , 4.9221333265 , 8.3325237122 ],

[ 15.0472024679 , 4.923104167 , 8.3325237122 ],

[ 17.5956119299 , 4.9234575033 , 8.3325237122 ],

[ 1.0317283869 , 11.5441082716 , 8.3325237122 ],

[ 4.8536013365 , 4.9226626158 , 8.3335250702 ],

[ 4.8526204824 , 9.3372820616 , 8.3335250702 ],

[ 18.8703616857 , 11.5448979139 , 8.3335250702 ],

[ 16.3215926885 , 11.5455187559 , 8.3335250702 ],

[ 22.6925929784 , 4.9235452414 , 8.3345245209 ],

[ 3.5791333914 , 7.1301053763 , 8.3345245209 ],

[ 8.6743663549 , 11.5436686277 , 8.3345245209 ],

[ 11.2236922979 , 11.5448979139 , 8.3345245209 ],

[ 20.1432632208 , 4.9233692885 , 8.3355239716 ],

[ 3.5811084509 , 11.5424288511 , 8.3355239716 ],

[ 6.1270755529 , 11.5431383848 , 8.3355239716 ],

[ 13.7718518972 , 11.5467585325 , 8.3355239716 ],

[ 21.4163917303 , 7.1290453673 , 8.3365234222 ],

[ 16.3254722357 , 8.6050871611 , 10.3975204315 ],

[ 7.4034365415 , 6.3877586126 , 10.3985198822 ],

[ 18.8768924474 , 8.6034106016 , 10.3985198822 ],

[ 13.7747119665 , 8.6052645445 , 10.3985198822 ],

[ 9.9537853002 , 6.3889945746 , 10.3995193329 ],

[ 11.2250322103 , 8.6035870314 , 10.3995193329 ],

[ 8.6741193533 , 8.6019095183 , 10.4005206909 ],

[ 15.0479120016 , 6.3922604323 , 10.4025195923 ],

[ 12.5008720159 , 6.3902305365 , 10.4035209503 ],

[ 4.8547695875 , 6.3913773298 , 10.4055198517 ],

[ 17.5979522466 , 6.3919075728 , 10.4055198517 ],

[ 6.124993205 , 8.6024397612 , 10.4055198517 ],

[ 8.6783117056 , 4.1820815802 , 10.4065193024 ],

[ 21.4235728979 , 8.6018217802 , 10.4065193024 ],

[ 17.5978416204 , 10.8099688292 , 10.4065193024 ],

[ 15.0470327139 , 10.8105887175 , 10.4065193024 ],

[ 6.1300524473 , 4.1825236082 , 10.4075206604 ],

[ 13.77498281 , 4.1855243445 , 10.4075206604 ],

[ 9.9520400762 , 10.808118701 , 10.4075206604 ],

[ 20.1480315923 , 10.8086479902 , 10.4075206604 ],

[ 16.3233932256 , 4.1862305403 , 10.4085201111 ],

[ 3.5769883394 , 8.6006735563 , 10.4085201111 ],

[ 2.3083823919 , 10.8060883284 , 10.4085201111 ],

[ 12.4992822408 , 10.8076781035 , 10.4085201111 ],

[ 11.226362586 , 4.1837595701 , 10.4095195618 ],

[ 23.9682716131 , 4.1861423254 , 10.4105209198 ],

[ 21.4196132421 , 4.1876434088 , 10.4105209198 ],

[ 22.6926330328 , 6.3927901983 , 10.4115203705 ],

[ 7.401640296 , 10.8059080839 , 10.4115203705 ],

[ 18.8695625066 , 4.1894096136 , 10.4155200806 ],

[ 20.1413730383 , 6.3917301893 , 10.4155200806 ],

[ 4.8580693006 , 10.8042286635 , 10.4165195312 ],

[ 17.6028426885 , 7.8792494536 , 12.4435199585 ],

[ 7.4003232717 , 7.8543542624 , 12.4455207672 ],

[ 15.0510619878 , 7.8713043928 , 12.4475196686 ],

[ 9.9517930746 , 7.8621233702 , 12.4485210266 ],

[ 12.5014823675 , 7.8676842451 , 12.4485210266 ],

[ 8.68472898 , 5.6544164419 , 12.4695209351 ],

[ 16.3181327581 , 10.0786579847 , 12.4715198364 ],

[ 16.315292716 , 5.6593593359 , 12.4725192871 ],

[ 4.850279212 , 7.8617705107 , 12.4725192871 ],

[ 20.1516631841 , 7.8707741499 , 12.4725192871 ],

[ 6.1308635473 , 5.6543272734 , 12.4735206451 ],

[ 8.6862453222 , 10.0728281736 , 12.4745200958 ],

[ 18.8722518682 , 10.0786579847 , 12.4745200958 ],

[ 11.2296222448 , 5.6594485045 , 12.4775203552 ],

[ 13.7753823995 , 5.6615666151 , 12.4795192566 ],

[ 13.7727721929 , 10.0747784376 , 12.4795192566 ],

[ 11.2267020941 , 10.0721281767 , 12.4815200653 ],

[ 12.5062822103 , 3.4577444792 , 12.4845203247 ],

[ 7.4079812765 , 3.4532414675 , 12.4855197754 ],

[ 17.5894016027 , 3.4532414675 , 12.4865211334 ],

[ 22.6909126043 , 3.4532414675 , 12.4865211334 ],

[ 1.0334143638 , 10.0746887922 , 12.4865211334 ],

[ 3.581941247 , 5.6576822996 , 12.4875205841 ],

[ 15.0485318899 , 3.4532414675 , 12.4895194855 ],

[ 20.1410716772 , 3.4532414675 , 12.4895194855 ],

[ 9.9574121237 , 3.453594327 , 12.4895194855 ],

[ 4.855898261 , 3.4532414675 , 12.4905208435 ],

[ 3.5851904154 , 10.0723885298 , 12.4915202942 ],

[ 21.4170516729 , 5.6589182615 , 12.4925197449 ],

[ 2.3069642782 , 7.8663605452 , 12.4925197449 ],

[ 18.8651832342 , 5.6610373259 , 12.5005210724 ],

[ 6.1369675398 , 10.0718582869 , 12.5005210724 ],

[ 19.5994724035 , 8.3293017149 , 15.2635196533 ],

[ 5.3906463384 , 7.4332584143 , 15.2665199127 ],

[ 7.266028285 , 5.6183093786 , 15.3015197601 ],

[ 17.7235816717 , 10.1437186003 , 15.311519989 ],

[ 18.5279124975 , 8.1502693892 , 15.3155196991 ],

[ 6.4621514082 , 7.6120256186 , 15.3175205078 ],

[ 9.9774373769 , 5.4150885344 , 15.3295196381 ],

[ 17.8968318701 , 6.3442362547 , 15.3355201569 ],

[ 12.4450124502 , 5.3792475462 , 15.3395198669 ],

[ 7.4641383886 , 6.6904705763 , 15.3395198669 ],

[ 7.0937441587 , 9.4175289869 , 15.3415206757 ],

[ 15.0124725103 , 10.3460587263 , 15.3415206757 ],

[ 17.5255721807 , 9.0713833571 , 15.3455203857 ],

[ 14.9114221334 , 5.3143614531 , 15.3505195465 ],

[ 12.5454124212 , 10.3817280531 , 15.3515209045 ],

[ 9.9966491461 , 6.5061415434 , 15.3605197754 ],

[ 10.0795120001 , 10.4467886686 , 15.3625205841 ],

[ 12.467642188 , 6.4707411528 , 15.3665202942 ],

[ 14.993522048 , 9.2549170256 , 15.3675197449 ],

[ 12.5226320028 , 9.2901400328 , 15.3735202637 ],

[ 14.9397023916 , 6.4045313597 , 15.3805202332 ],

[ 11.2498019933 , 7.1785701513 , 15.386520752 ],

[ 8.8035310507 , 7.2244762182 , 15.386520752 ],

[ 10.0510219335 , 9.3566149473 , 15.386520752 ],

[ 16.1864818334 , 8.5368469954 , 15.3895210114 ],

[ 13.7406724691 , 8.582311511 , 15.3895210114 ],

[ 13.7089723348 , 7.1293982267 , 15.3915199127 ],

[ 11.2813028097 , 8.6314829588 , 15.3945201721 ],

[ 16.1298621893 , 7.0992072821 , 15.4015201416 ],

[ 8.8606122732 , 8.6620281935 , 15.4035209503 ],

[ 11.9048 , 6.765939960267, 18.4203265991 ],

[ 11.9048 , 4.958589801567, 20.2276767578 ],

[ 10.0974498413 , 6.765939960267, 20.2276767578 ],

[ 13.7121501587 , 6.765939960267, 20.2276767578 ],

[ 11.9048 , 8.573290118967, 20.2276767578 ],

[ 11.9048 , 3.151239881267, 22.0350269165 ],

[ 10.0974498413 , 4.958589801567, 22.0350269165 ],

[ 13.7121501587 , 4.958589801567, 22.0350269165 ],

[ 11.9048 , 6.765939960267, 22.0350269165 ],

[ 10.0974498413 , 8.573290118967, 22.0350269165 ],

[ 13.7121501587 , 8.573290118967, 22.0350269165 ],

[ 11.9048 , 10.380640277667, 22.0350269165 ],

[ 10.0974498413 , 3.151239881267, 23.8423770752 ],

[ 13.7121501587 , 3.151239881267, 23.8423770752 ],

[ 11.9048 , 4.958589801567, 23.8423770752 ],

[ 10.0974498413 , 6.765939960267, 23.8423770752 ],

[ 13.7121501587 , 6.765939960267, 23.8423770752 ],

[ 11.9048 , 8.573290118967, 23.8423770752 ],

[ 10.0974498413 , 10.380640277667, 23.8423770752 ],

[ 13.7121501587 , 10.380640277667, 23.8423770752 ],

[ 11.9048 , 3.151239881267, 25.6497272339 ],

[ 10.0974498413 , 4.958589801567, 25.6497272339 ],

[ 13.7121501587 , 4.958589801567, 25.6497272339 ],

[ 11.9048 , 6.765939960267, 25.6497272339 ],

[ 10.0974498413 , 8.573290118967, 25.6497272339 ],

[ 13.7121501587 , 8.573290118967, 25.6497272339 ],

[ 11.9048 , 10.380640277667, 25.6497272339 ],

[ 10.0974498413 , 3.151239881267, 27.4570773926 ],

[ 13.7121501587 , 3.151239881267, 27.4570773926 ],

[ 11.9048 , 4.958589801567, 27.4570773926 ],

[ 10.0974498413 , 6.765939960267, 27.4570773926 ],

[ 13.7121501587 , 6.765939960267, 27.4570773926 ],

[ 11.9048 , 8.573290118967, 27.4570773926 ],

[ 10.0974498413 , 10.380640277667, 27.4570773926 ],

[ 13.7121501587 , 10.380640277667, 27.4570773926 ],

[ 11.9048 , 3.151239881267, 29.2644275513 ],

[ 10.0974498413 , 4.958589801567, 29.2644275513 ],

[ 13.7121501587 , 4.958589801567, 29.2644275513 ],

[ 11.9048 , 6.765939960267, 29.2644275513 ],

[ 10.0974498413 , 8.573290118967, 29.2644275513 ],

[ 13.7121501587 , 8.573290118967, 29.2644275513 ],

[ 11.9048 , 10.380640277667, 29.2644275513 ]]*Angstrom

# Set up configuration

central_region = BulkConfiguration(

bravais_lattice=central_region_lattice,

elements=central_region_elements,

cartesian_coordinates=central_region_coordinates

)

device_configuration = DeviceConfiguration(

central_region,

[left_electrode, right_electrode],

equivalent_electrode_lengths=[7.22940064, 7.2293930054]*Angstrom,

transverse_electrode_repetitions=[[1, 1], [1, 1]],

)

# -------------------------------------------------------------

# Calculator

# -------------------------------------------------------------

#----------------------------------------

# Basis Set

#----------------------------------------

basis_set = [

GGABasis.Hydrogen_DoubleZetaPolarized,

GGABasis.Carbon_DoubleZetaPolarized,

GGABasis.Copper_DoubleZetaPolarized,

GGABasis.Selenium_DoubleZetaPolarized,

]

#----------------------------------------

# Numerical Accuracy Settings

#----------------------------------------

device_k_point_sampling = MonkhorstPackGrid(

na=2,

nc=261,

)

device_numerical_accuracy_parameters = NumericalAccuracyParameters(

density_mesh_cutoff=100.0*Hartree,

k_point_sampling=device_k_point_sampling,

)

#----------------------------------------

# Contour Integral Settings

#----------------------------------------

equilibrium_contour = SemiCircleContour(

integral_lower_bound=1.84481605655*Hartree,

circle_points=30,

)

contour_parameters = ContourParameters(

equilibrium_contour=equilibrium_contour,

)

#----------------------------------------

# Device Calculator

#----------------------------------------

calculator = DeviceLCAOCalculator(

basis_set=basis_set,

numerical_accuracy_parameters=device_numerical_accuracy_parameters,

contour_parameters=contour_parameters,

)

device_configuration.setCalculator(calculator)

nlprint(device_configuration)

nlsave('Re-phy-Cu-ADS-Cu-b3-012-012.hdf5', device_configuration)

# -------------------------------------------------------------

# IV Characteristics

# -------------------------------------------------------------

# Kpoint sampling

kpoint_grid = MonkhorstPackGrid(

na=2,

)

# Gate-source voltages

gate_source_voltages = numpy.linspace(0, 0, 1)*Volt

# Drain-source voltages

drain_source_voltages = numpy.linspace(-0.12, 0.12, 3)*Volt

# File name.

filename = 'Re-phy-Cu-ADS-Cu-b3-012-012.hdf5'

iv_characteristics = IVCharacteristics(

configuration=device_configuration,

filename=filename,

object_id='ivcharacteristics',

gate_regions=[],

gate_source_voltages=gate_source_voltages,

drain_source_voltages=drain_source_voltages,

energies=None,

kpoints=kpoint_grid,

self_energy_calculator=RecursionSelfEnergy(),

energy_zero_parameter=AverageFermiLevel,

infinitesimal=1e-06*eV,

log_filename_prefix='ivcharacteristics_',

number_of_processes_per_task=None,

enforce_zero_transmission_in_band_gap=True,

)

iv_characteristics.update()

**chem-Cu-ADS-Cu-*b*3.py**

# -*- coding: utf-8 -*-

# -------------------------------------------------------------

# Two-probe Configuration

# -------------------------------------------------------------

# -------------------------------------------------------------

# Left Electrode

# -------------------------------------------------------------

# Set up lattice

vector_a = [25.0, 0.0, 0.0]*Angstrom

vector_b = [0.0, 15.0, 0.0]*Angstrom

vector_c = [0.0, 0.0, 3.61470032]*Angstrom

left_electrode_lattice = UnitCell(vector_a, vector_b, vector_c)

# Define elements

left_electrode_elements = [Copper, Copper, Copper, Copper, Copper, Copper, Copper, Copper,

Copper, Copper, Copper, Copper, Copper, Copper, Copper]

# Define coordinates

left_electrode_coordinates = [[ 10.6926496004 , 3.88530015845, 0.9035754 ],

[ 14.3073499204 , 3.88530015845, 0.9035754 ],

[ 12.4999997604 , 5.69265007845, 0.9035754 ],

[ 10.6926496004 , 7.50000023845, 0.9035754 ],

[ 14.3073499204 , 7.50000023845, 0.9035754 ],

[ 12.4999997604 , 9.30735039845, 0.9035754 ],

[ 10.6926496004 , 11.11470055845, 0.9035754 ],

[ 14.3073499204 , 11.11470055845, 0.9035754 ],

[ 12.4999997604 , 3.88530015845, 2.71092556 ],

[ 10.6926496004 , 5.69265007845, 2.71092556 ],

[ 14.3073499204 , 5.69265007845, 2.71092556 ],

[ 12.4999997604 , 7.50000023845, 2.71092556 ],

[ 10.6926496004 , 9.30735039845, 2.71092556 ],

[ 14.3073499204 , 9.30735039845, 2.71092556 ],

[ 12.4999997604 , 11.11470055845, 2.71092556 ]]*Angstrom

# Set up configuration

left_electrode = BulkConfiguration(

bravais_lattice=left_electrode_lattice,

elements=left_electrode_elements,

cartesian_coordinates=left_electrode_coordinates

)

# -------------------------------------------------------------

# Right Electrode

# -------------------------------------------------------------

# Set up lattice

vector_a = [25.0, 0.0, 0.0]*Angstrom

vector_b = [0.0, 15.0, 0.0]*Angstrom

vector_c = [0.0, 0.0, 3.6146965027]*Angstrom

right_electrode_lattice = UnitCell(vector_a, vector_b, vector_c)

# Define elements

right_electrode_elements = [Copper, Copper, Copper, Copper, Copper, Copper, Copper, Copper,

Copper, Copper, Copper, Copper, Copper, Copper, Copper]

# Define coordinates

right_electrode_coordinates = [[ 10.0974498413 , 3.151239881228, 0.9037728546 ],

[ 13.7121501587 , 3.151239881228, 0.9037728546 ],

[ 11.9048 , 4.958589801528, 0.9037728546 ],

[ 10.0974498413 , 6.765939960228, 0.9037728546 ],

[ 13.7121501587 , 6.765939960228, 0.9037728546 ],

[ 11.9048 , 8.573290118928, 0.9037728546 ],

[ 10.0974498413 , 10.380640277628, 0.9037728546 ],

[ 13.7121501587 , 10.380640277628, 0.9037728546 ],

[ 11.9048 , 3.151239881228, 2.7111230133 ],

[ 10.0974498413 , 4.958589801528, 2.7111230133 ],

[ 13.7121501587 , 4.958589801528, 2.7111230133 ],

[ 11.9048 , 6.765939960228, 2.7111230133 ],

[ 10.0974498413 , 8.573290118928, 2.7111230133 ],

[ 13.7121501587 , 8.573290118928, 2.7111230133 ],

[ 11.9048 , 10.380640277628, 2.7111230133 ]]*Angstrom

# Set up configuration

right_electrode = BulkConfiguration(

bravais_lattice=right_electrode_lattice,

elements=right_electrode_elements,

cartesian_coordinates=right_electrode_coordinates

)

# -------------------------------------------------------------

# Central Region

# -------------------------------------------------------------

# Set up lattice

vector_a = [25.0, 0.0, 0.0]*Angstrom

vector_b = [0.0, 15.0, 0.0]*Angstrom

vector_c = [0.0, 0.0, 30.167997226]*Angstrom

central_region_lattice = UnitCell(vector_a, vector_b, vector_c)

# Define elements

central_region_elements = [Copper, Copper, Copper, Copper, Copper, Copper, Copper, Copper,

Copper, Copper, Copper, Copper, Copper, Copper, Copper, Copper,

Copper, Copper, Copper, Copper, Copper, Copper, Copper, Copper,

Copper, Copper, Copper, Copper, Copper, Copper, Copper, Copper,

Copper, Copper, Copper, Copper, Copper, Copper, Copper, Copper,

Copper, Copper, Copper, Copper, Copper, Copper, Copper, Copper,

Copper, Copper, Copper, Copper, Copper, Copper, Copper, Copper,

Copper, Copper, Copper, Copper, Copper, Copper, Copper, Copper,

Copper, Copper, Copper, Copper, Copper, Copper, Copper, Copper,

Copper, Copper, Copper, Copper, Copper, Copper, Copper, Copper,

Copper, Copper, Copper, Copper, Copper, Copper, Copper, Copper,

Copper, Copper, Copper, Copper, Copper, Copper, Copper, Copper,

Copper, Copper, Copper, Copper, Copper, Copper, Copper, Copper,

Copper, Copper, Copper, Copper, Copper, Copper, Copper, Copper,

Copper, Copper, Copper, Copper, Copper, Copper, Copper, Copper,

Copper, Copper, Copper, Copper, Copper, Copper, Carbon, Carbon,

Carbon, Carbon, Carbon, Carbon, Carbon, Hydrogen, Carbon, Hydrogen,

Carbon, Hydrogen, Hydrogen, Carbon, Hydrogen, Carbon, Hydrogen,

Carbon, Selenium, Selenium, Carbon, Carbon, Carbon, Carbon, Carbon,

Carbon, Hydrogen, Hydrogen, Hydrogen, Hydrogen, Copper, Copper,

Copper, Copper, Copper, Copper, Copper, Copper, Copper, Copper,

Copper, Copper, Copper, Copper, Copper, Copper, Copper, Copper,

Copper, Copper, Copper, Copper, Copper, Copper, Copper, Copper,

Copper, Copper, Copper, Copper, Copper, Copper, Copper, Copper,

Copper, Copper, Copper, Copper, Copper, Copper, Copper, Copper]

# Define coordinates

central_region_coordinates = [[ 10.6926496004 , 3.88530015845 , 0.9035754 ],

[ 14.3073499204 , 3.88530015845 , 0.9035754 ],

[ 12.4999997604 , 5.69265007845 , 0.9035754 ],

[ 10.6926496004 , 7.50000023845 , 0.9035754 ],

[ 14.3073499204 , 7.50000023845 , 0.9035754 ],

[ 12.4999997604 , 9.30735039845 , 0.9035754 ],

[ 10.6926496004 , 11.11470055845 , 0.9035754 ],

[ 14.3073499204 , 11.11470055845 , 0.9035754 ],

[ 12.4999997604 , 3.88530015845 , 2.71092556 ],

[ 10.6926496004 , 5.69265007845 , 2.71092556 ],

[ 14.3073499204 , 5.69265007845 , 2.71092556 ],

[ 12.4999997604 , 7.50000023845 , 2.71092556 ],

[ 10.6926496004 , 9.30735039845 , 2.71092556 ],

[ 14.3073499204 , 9.30735039845 , 2.71092556 ],

[ 12.4999997604 , 11.11470055845 , 2.71092556 ],

[ 10.6926496004 , 3.88530015845 , 4.51827571 ],

[ 14.3073499204 , 3.88530015845 , 4.51827571 ],

[ 12.4999997604 , 5.69265007845 , 4.51827571 ],

[ 10.6926496004 , 7.50000023845 , 4.51827571 ],

[ 14.3073499204 , 7.50000023845 , 4.51827571 ],

[ 12.4999997604 , 9.30735039845 , 4.51827571 ],

[ 10.6926496004 , 11.11470055845 , 4.51827571 ],

[ 14.3073499204 , 11.11470055845 , 4.51827571 ],

[ 12.4999997604 , 3.88530015845 , 6.32562587 ],

[ 10.6926496004 , 5.69265007845 , 6.32562587 ],

[ 14.3073499204 , 5.69265007845 , 6.32562587 ],

[ 12.4999997604 , 7.50000023845 , 6.32562587 ],

[ 10.6926496004 , 9.30735039845 , 6.32562587 ],

[ 14.3073499204 , 9.30735039845 , 6.32562587 ],

[ 12.4999997604 , 11.11470055845 , 6.32562587 ],

[ 3.5799309611 , 11.55716919905 , 8.3275264587 ],

[ 15.0424889922 , 9.34946560865 , 8.3295253601 ],

[ 8.6729840636 , 11.56228852275 , 8.3295253601 ],

[ 11.2219085097 , 11.56317830085 , 8.3295253601 ],

[ 12.4971389175 , 9.34840607645 , 8.3305267181 ],

[ 6.1268658042 , 11.56008839615 , 8.3305267181 ],

[ 7.4030150771 , 9.34725880625 , 8.3315261688 ],

[ 2.3047119975 , 9.34911274915 , 8.3315261688 ],

[ 18.8709697127 , 11.55831837655 , 8.3315261688 ],

[ 13.7716493011 , 11.56228852275 , 8.3315261688 ],

[ 9.9510316253 , 4.93961262705 , 8.3325256195 ],

[ 4.8561820388 , 9.34734654425 , 8.3325256195 ],

[ 17.592489183 , 9.34955334665 , 8.3325256195 ],

[ 20.1437987685 , 9.35052514075 , 8.3325256195 ],

[ 16.3206691146 , 11.55911850935 , 8.3325256195 ],

[ 1.0331498981 , 11.55964875225 , 8.3325256195 ],

[ 9.9480122924 , 9.34611058235 , 8.3335269775 ],

[ 22.6923789382 , 4.93696475035 , 8.3345264282 ],

[ 4.8549208045 , 4.93731760985 , 8.3345264282 ],

[ 7.4022120833 , 4.93996596335 , 8.3345264282 ],

[ 3.5815238357 , 7.14255261425 , 8.3345264282 ],

[ 20.1435584426 , 4.93908381465 , 8.3355258789 ],

[ 17.5950984359 , 4.94058394435 , 8.3355258789 ],

[ 6.1295790076 , 7.14211153985 , 8.3355258789 ],

[ 18.8674086928 , 7.14202284815 , 8.3365253296 ],

[ 12.4989890456 , 4.94323277475 , 8.3375266876 ],

[ 15.0471991897 , 4.94393897055 , 8.3375266876 ],

[ 21.4148597121 , 7.14193463325 , 8.3375266876 ],

[ 8.6792153716 , 7.14105153085 , 8.339525589 ],

[ 11.2287492156 , 7.14193463325 , 8.339525589 ],

[ 16.3195590377 , 7.14069867135 , 8.3435252991 ],

[ 13.7724189162 , 7.14131665235 , 8.3445266571 ],

[ 9.9445418716 , 10.81861901285 , 10.3835281219 ],

[ 12.4942788482 , 10.82444882395 , 10.3865283813 ],

[ 7.3989838958 , 10.81438851355 , 10.3915275421 ],

[ 8.6754521728 , 4.19232296945 , 10.3925289001 ],

[ 15.0467690826 , 10.82656884195 , 10.3935283508 ],

[ 4.85342592 , 10.81367897995 , 10.3955272522 ],

[ 18.8749980331 , 8.61868405345 , 10.4005283203 ],

[ 17.6007880569 , 10.82532906535 , 10.4005283203 ],

[ 2.3080720305 , 10.81685853005 , 10.401527771 ],

[ 11.2252387404 , 4.20123887065 , 10.4035285797 ],

[ 16.3124694228 , 8.61912465095 , 10.4035285797 ],

[ 20.1508292556 , 10.82391858105 , 10.4035285797 ],

[ 3.5782069564 , 8.61162114145 , 10.4045280304 ],

[ 13.7743186355 , 4.20750689505 , 10.4065288391 ],

[ 22.6971186996 , 6.40797495845 , 10.4075282898 ],

[ 6.1288227439 , 4.20088553435 , 10.4085277405 ],

[ 23.9680690169 , 4.20097374915 , 10.4085277405 ],

[ 16.3220691085 , 4.20865464215 , 10.4085277405 ],

[ 21.4198493362 , 8.61426949505 , 10.4085277405 ],

[ 21.420368135 , 4.20397591595 , 10.4095290985 ],

[ 4.8575667739 , 6.40488457685 , 10.4125274506 ],

[ 6.1290659308 , 8.60738396645 , 10.4125274506 ],

[ 11.2245187163 , 8.61117959025 , 10.4125274506 ],

[ 13.7693585753 , 8.61524033545 , 10.4135288086 ],

[ 18.8718585372 , 4.20768380165 , 10.4145282593 ],

[ 8.6706475616 , 8.60508751875 , 10.4185279694 ],

[ 9.9620370269 , 6.40717959405 , 10.4205287781 ],

[ 7.4011368156 , 6.41044688225 , 10.4205287781 ],

[ 20.141158998 , 6.40656256675 , 10.4235290375 ],

[ 17.5994796157 , 6.40444350245 , 10.4285281982 ],

[ 15.0432690978 , 6.41159367565 , 10.4465278473 ],

[ 12.5025491118 , 6.41097664835 , 10.448528656 ],

[ 8.6872720122 , 5.64647078515 , 12.4315284576 ],

[ 17.5970286727 , 7.91191363335 , 12.434528717 ],

[ 12.503269136 , 3.43682169915 , 12.4465278473 ],

[ 13.7715491653 , 10.12773919105 , 12.447527298 ],

[ 15.0574387908 , 3.44732785225 , 12.448528656 ],

[ 11.2188491225 , 10.11361908915 , 12.4495281067 ],

[ 9.947875917 , 3.44538474085 , 12.4565280762 ],

[ 16.3248996139 , 10.11529850965 , 12.4595283356 ],

[ 8.6783398986 , 10.09710907935 , 12.4635280457 ],

[ 17.5960196853 , 3.46613073355 , 12.4665283051 ],

[ 7.4027771354 , 3.45624375345 , 12.4695285645 ],

[ 18.8733691573 , 10.10107827185 , 12.4715274658 ],

[ 6.1242699027 , 10.09066891675 , 12.4725288239 ],

[ 4.8411001563 , 7.87766051295 , 12.4795287933 ],

[ 9.9422063232 , 7.89178586005 , 12.4795287933 ],

[ 20.1558493972 , 3.46966171265 , 12.480528244 ],

[ 20.1448783279 , 7.89063763625 , 12.4815276947 ],

[ 3.5783550143 , 10.08351826675 , 12.4835285034 ],

[ 21.4328498244 , 5.67675185205 , 12.4845279541 ],

[ 1.0319309831 , 10.08924889565 , 12.4845279541 ],

[ 4.8559951186 , 3.46613073355 , 12.4865287628 ],

[ 2.3037478328 , 7.88110375405 , 12.4875282135 ],

[ 3.5876440406 , 5.67321991925 , 12.4885276642 ],

[ 22.6995696425 , 3.47213363655 , 12.4895290222 ],

[ 6.1311640143 , 5.66333270075 , 12.4895290222 ],

[ 11.2323693633 , 5.64161562925 , 12.4905284729 ],

[ 15.0495786071 , 7.92506670955 , 12.4905284729 ],

[ 16.3312396407 , 5.66633391385 , 12.4955276337 ],

[ 12.4942387939 , 7.92612671855 , 12.4975284424 ],

[ 7.3850778937 , 7.88640093805 , 12.5115283813 ],

[ 13.782109201 , 5.64143872265 , 12.5155280914 ],

[ 18.8853091598 , 5.66854071625 , 12.5215286102 ],

[ 12.9113587737 , 8.13729310035 , 14.6945289459 ],

[ 13.0834893584 , 5.30659270285 , 14.7055286255 ],

[ 14.2906188369 , 6.06438851355 , 14.7895282593 ],

[ 14.2116689086 , 7.51756691935 , 14.8045276489 ],

[ 11.7043790221 , 7.37817263605 , 14.8075279083 ],

[ 11.7805384994 , 5.92631888395 , 14.8165286865 ],

[ 15.5819491744 , 5.43795371055 , 14.8685287323 ],

[ 13.1451587081 , 4.23010659225 , 14.8795284119 ],

[ 10.417589128 , 8.00381302835 , 14.8825286713 ],

[ 12.8526391387 , 9.21148419385 , 14.8825286713 ],

[ 15.3983086944 , 8.28154206275 , 14.9235290375 ],

[ 15.6352185607 , 4.35131478315 , 14.9445289459 ],

[ 10.3650893569 , 9.09159970285 , 14.948528656 ],

[ 10.596439302 , 5.16322684295 , 14.9615272369 ],

[ 15.3206786513 , 9.36659169205 , 15.012527832 ],

[ 16.7231788039 , 6.23574090005 , 15.0285285797 ],

[ 10.6747292876 , 4.07702851295 , 15.0385288086 ],

[ 9.2784489989 , 7.20770382885 , 15.0655273285 ],

[ 18.5574797988 , 5.63216996195 , 15.0765289154 ],

[ 7.4520000815 , 7.82098460205 , 15.0765289154 ],

[ 16.6632880569 , 7.65307688715 , 15.0855277863 ],

[ 9.33115381 , 5.79116177565 , 15.1165279236 ],

[ 17.938159883 , 8.30096364025 , 15.2335285034 ],

[ 8.0496606231 , 5.14910197265 , 15.2535289612 ],

[ 6.9623531699 , 5.97760987285 , 15.2735275116 ],

[ 19.0282687545 , 7.47607493405 , 15.2755283203 ],

[ 18.033359468 , 9.38680768015 , 15.2845290985 ],

[ 7.9491547942 , 4.06396365165 , 15.3125289764 ],

[ 20.0781096816 , 7.74285674095 , 15.3655284729 ],

[ 5.9118980765 , 5.71859574325 , 15.3735278931 ],

[ 11.9048 , 6.765939960228, 18.4203265991 ],

[ 11.9048 , 4.958589801528, 20.2276767578 ],

[ 10.0974498413 , 6.765939960228, 20.2276767578 ],

[ 13.7121501587 , 6.765939960228, 20.2276767578 ],

[ 11.9048 , 8.573290118928, 20.2276767578 ],

[ 11.9048 , 3.151239881228, 22.0350269165 ],

[ 10.0974498413 , 4.958589801528, 22.0350269165 ],

[ 13.7121501587 , 4.958589801528, 22.0350269165 ],

[ 11.9048 , 6.765939960228, 22.0350269165 ],

[ 10.0974498413 , 8.573290118928, 22.0350269165 ],

[ 13.7121501587 , 8.573290118928, 22.0350269165 ],

[ 11.9048 , 10.380640277628, 22.0350269165 ],

[ 10.0974498413 , 3.151239881228, 23.8423770752 ],

[ 13.7121501587 , 3.151239881228, 23.8423770752 ],

[ 11.9048 , 4.958589801528, 23.8423770752 ],

[ 10.0974498413 , 6.765939960228, 23.8423770752 ],

[ 13.7121501587 , 6.765939960228, 23.8423770752 ],

[ 11.9048 , 8.573290118928, 23.8423770752 ],

[ 10.0974498413 , 10.380640277628, 23.8423770752 ],

[ 13.7121501587 , 10.380640277628, 23.8423770752 ],

[ 11.9048 , 3.151239881228, 25.6497272339 ],

[ 10.0974498413 , 4.958589801528, 25.6497272339 ],

[ 13.7121501587 , 4.958589801528, 25.6497272339 ],

[ 11.9048 , 6.765939960228, 25.6497272339 ],

[ 10.0974498413 , 8.573290118928, 25.6497272339 ],

[ 13.7121501587 , 8.573290118928, 25.6497272339 ],

[ 11.9048 , 10.380640277628, 25.6497272339 ],

[ 10.0974498413 , 3.151239881228, 27.4570773926 ],

[ 13.7121501587 , 3.151239881228, 27.4570773926 ],

[ 11.9048 , 4.958589801528, 27.4570773926 ],

[ 10.0974498413 , 6.765939960228, 27.4570773926 ],

[ 13.7121501587 , 6.765939960228, 27.4570773926 ],

[ 11.9048 , 8.573290118928, 27.4570773926 ],

[ 10.0974498413 , 10.380640277628, 27.4570773926 ],

[ 13.7121501587 , 10.380640277628, 27.4570773926 ],

[ 11.9048 , 3.151239881228, 29.2644275513 ],

[ 10.0974498413 , 4.958589801528, 29.2644275513 ],

[ 13.7121501587 , 4.958589801528, 29.2644275513 ],

[ 11.9048 , 6.765939960228, 29.2644275513 ],

[ 10.0974498413 , 8.573290118928, 29.2644275513 ],

[ 13.7121501587 , 8.573290118928, 29.2644275513 ],

[ 11.9048 , 10.380640277628, 29.2644275513 ]]*Angstrom

# Set up configuration

central_region = BulkConfiguration(

bravais_lattice=central_region_lattice,

elements=central_region_elements,

cartesian_coordinates=central_region_coordinates

)

device_configuration = DeviceConfiguration(

central_region,

[left_electrode, right_electrode],

equivalent_electrode_lengths=[7.22940064, 7.2293930054]*Angstrom,

transverse_electrode_repetitions=[[1, 1], [1, 1]],

)

# -------------------------------------------------------------

# Calculator

# -------------------------------------------------------------

#----------------------------------------

# Basis Set

#----------------------------------------

basis_set = [

GGABasis.Hydrogen_DoubleZetaPolarized,

GGABasis.Carbon_DoubleZetaPolarized,

GGABasis.Copper_DoubleZetaPolarized,

GGABasis.Selenium_DoubleZetaPolarized,

]

#----------------------------------------

# Numerical Accuracy Settings

#----------------------------------------

device_k_point_sampling = MonkhorstPackGrid(

na=2,

nc=261,

)

device_numerical_accuracy_parameters = NumericalAccuracyParameters(

density_mesh_cutoff=100.0*Hartree,

k_point_sampling=device_k_point_sampling,

)

#----------------------------------------

# Contour Integral Settings

#----------------------------------------

equilibrium_contour = SemiCircleContour(

integral_lower_bound=1.84481605655*Hartree,

circle_points=30,

)

contour_parameters = ContourParameters(

equilibrium_contour=equilibrium_contour,

)

#----------------------------------------

# Device Calculator

#----------------------------------------

calculator = DeviceLCAOCalculator(

basis_set=basis_set,

numerical_accuracy_parameters=device_numerical_accuracy_parameters,

contour_parameters=contour_parameters,

)

device_configuration.setCalculator(calculator)

nlprint(device_configuration)

nlsave('chem-Cu-ADS-Cu-b3-012-012.hdf5', device_configuration)

# -------------------------------------------------------------

# IV Characteristics

# -------------------------------------------------------------

# Kpoint sampling

kpoint_grid = KpointDensity(

density_a=7.0*Angstrom,

density_b=2.38732414638*Angstrom,

density_c=0.0*Angstrom,

)

# Gate-source voltages

gate_source_voltages = numpy.linspace(0, 0, 1)*Volt

# Drain-source voltages

drain_source_voltages = numpy.linspace(-0.12, 0.12, 3)*Volt

# File name.

filename = 'chem-Cu-ADS-Cu-b3-012-012.hdf5'

iv_characteristics = IVCharacteristics(

configuration=device_configuration,

filename=filename,

object_id='ivcharacteristics',

gate_regions=[],

gate_source_voltages=gate_source_voltages,

drain_source_voltages=drain_source_voltages,

energies=None,

kpoints=kpoint_grid,

self_energy_calculator=RecursionSelfEnergy(),

energy_zero_parameter=AverageFermiLevel,

infinitesimal=1e-06*eV,

log_filename_prefix='ivcharacteristics_',

number_of_processes_per_task=None,

enforce_zero_transmission_in_band_gap=True,

)

iv_characteristics.update()

**phys-Cu-ADS-Cu-*b*4.py**

# -*- coding: utf-8 -*-

# -------------------------------------------------------------

# Two-probe Configuration

# -------------------------------------------------------------

# -------------------------------------------------------------

# Left Electrode

# -------------------------------------------------------------

# Set up lattice

vector_a = [25.0, 0.0, 0.0]*Angstrom

vector_b = [0.0, 15.0, 0.0]*Angstrom

vector_c = [0.0, 0.0, 3.61470032]*Angstrom

left_electrode_lattice = UnitCell(vector_a, vector_b, vector_c)

# Define elements

left_electrode_elements = [Copper, Copper, Copper, Copper, Copper, Copper, Copper, Copper,

Copper, Copper, Copper, Copper, Copper, Copper, Copper]

# Define coordinates

left_electrode_coordinates = [[ 10.6926501976, 3.8852998008, 0.9035754 ],

[ 14.3073505176, 3.8852998008, 0.9035754 ],

[ 12.5000003576, 5.6926497208, 0.9035754 ],

[ 10.6926501976, 7.4999998808, 0.9035754 ],

[ 14.3073505176, 7.4999998808, 0.9035754 ],

[ 12.5000003576, 9.3073500408, 0.9035754 ],

[ 10.6926501976, 11.1147002008, 0.9035754 ],

[ 14.3073505176, 11.1147002008, 0.9035754 ],

[ 12.5000003576, 3.8852998008, 2.71092556 ],

[ 10.6926501976, 5.6926497208, 2.71092556 ],

[ 14.3073505176, 5.6926497208, 2.71092556 ],

[ 12.5000003576, 7.4999998808, 2.71092556 ],

[ 10.6926501976, 9.3073500408, 2.71092556 ],

[ 14.3073505176, 9.3073500408, 2.71092556 ],

[ 12.5000003576, 11.1147002008, 2.71092556 ]]*Angstrom

# Set up configuration

left_electrode = BulkConfiguration(

bravais_lattice=left_electrode_lattice,

elements=left_electrode_elements,

cartesian_coordinates=left_electrode_coordinates

)

# -------------------------------------------------------------

# Right Electrode

# -------------------------------------------------------------

# Set up lattice

vector_a = [25.0, 0.0, 0.0]*Angstrom

vector_b = [0.0, 15.0, 0.0]*Angstrom

vector_c = [0.0, 0.0, 3.6146965027]*Angstrom

right_electrode_lattice = UnitCell(vector_a, vector_b, vector_c)

# Define elements

right_electrode_elements = [Copper, Copper, Copper, Copper, Copper, Copper, Copper, Copper,

Copper, Copper, Copper, Copper, Copper, Copper, Copper]

# Define coordinates

right_electrode_coordinates = [[ 11.3870498413 , 5.392489881267, 0.9037728546 ],

[ 15.0017501587 , 5.392489881267, 0.9037728546 ],

[ 13.1944 , 7.199839801567, 0.9037728546 ],

[ 11.3870498413 , 9.007189960267, 0.9037728546 ],

[ 15.0017501587 , 9.007189960267, 0.9037728546 ],

[ 13.1944 , 10.814540118967, 0.9037728546 ],

[ 11.3870498413 , 12.621890277667, 0.9037728546 ],

[ 15.0017501587 , 12.621890277667, 0.9037728546 ],

[ 13.1944 , 5.392489881267, 2.7111230133 ],

[ 11.3870498413 , 7.199839801567, 2.7111230133 ],

[ 15.0017501587 , 7.199839801567, 2.7111230133 ],

[ 13.1944 , 9.007189960267, 2.7111230133 ],

[ 11.3870498413 , 10.814540118967, 2.7111230133 ],

[ 15.0017501587 , 10.814540118967, 2.7111230133 ],

[ 13.1944 , 12.621890277667, 2.7111230133 ]]*Angstrom

# Set up configuration

right_electrode = BulkConfiguration(

bravais_lattice=right_electrode_lattice,

elements=right_electrode_elements,

cartesian_coordinates=right_electrode_coordinates

)

# -------------------------------------------------------------

# Central Region

# -------------------------------------------------------------

# Set up lattice

vector_a = [25.0, 0.0, 0.0]*Angstrom

vector_b = [0.0, 15.0, 0.0]*Angstrom

vector_c = [0.0, 0.0, 30.167997226]*Angstrom

central_region_lattice = UnitCell(vector_a, vector_b, vector_c)

# Define elements

central_region_elements = [Copper, Copper, Copper, Copper, Copper, Copper, Copper, Copper,

Copper, Copper, Copper, Copper, Copper, Copper, Copper, Copper,

Copper, Copper, Copper, Copper, Copper, Copper, Copper, Copper,

Copper, Copper, Copper, Copper, Copper, Copper, Copper, Copper,

Copper, Copper, Copper, Copper, Copper, Copper, Copper, Copper,

Copper, Copper, Copper, Copper, Copper, Copper, Copper, Copper,

Copper, Copper, Copper, Copper, Copper, Copper, Copper, Copper,

Copper, Copper, Copper, Copper, Copper, Copper, Copper, Copper,

Copper, Copper, Copper, Copper, Copper, Copper, Copper, Copper,

Copper, Copper, Copper, Copper, Copper, Copper, Copper, Copper,

Copper, Copper, Copper, Copper, Copper, Copper, Copper, Copper,

Copper, Copper, Copper, Copper, Copper, Copper, Copper, Copper,

Copper, Copper, Copper, Copper, Copper, Copper, Copper, Copper,

Copper, Copper, Copper, Copper, Copper, Copper, Copper, Copper,

Copper, Copper, Copper, Copper, Copper, Copper, Copper, Copper,

Copper, Copper, Copper, Copper, Copper, Copper, Hydrogen, Hydrogen,

Hydrogen, Hydrogen, Carbon, Carbon, Hydrogen, Selenium, Hydrogen,

Carbon, Selenium, Hydrogen, Carbon, Hydrogen, Hydrogen, Carbon,

Hydrogen, Carbon, Carbon, Carbon, Carbon, Carbon, Carbon, Carbon,

Carbon, Carbon, Carbon, Carbon, Carbon, Carbon, Copper, Copper,

Copper, Copper, Copper, Copper, Copper, Copper, Copper, Copper,

Copper, Copper, Copper, Copper, Copper, Copper, Copper, Copper,

Copper, Copper, Copper, Copper, Copper, Copper, Copper, Copper,

Copper, Copper, Copper, Copper, Copper, Copper, Copper, Copper,

Copper, Copper, Copper, Copper, Copper, Copper, Copper, Copper]

# Define coordinates

central_region_coordinates = [[ 10.6926501976 , 3.8852998008 , 0.9035754 ],

[ 14.3073505176 , 3.8852998008 , 0.9035754 ],

[ 12.5000003576 , 5.6926497208 , 0.9035754 ],

[ 10.6926501976 , 7.4999998808 , 0.9035754 ],

[ 14.3073505176 , 7.4999998808 , 0.9035754 ],

[ 12.5000003576 , 9.3073500408 , 0.9035754 ],

[ 10.6926501976 , 11.1147002008 , 0.9035754 ],

[ 14.3073505176 , 11.1147002008 , 0.9035754 ],

[ 12.5000003576 , 3.8852998008 , 2.71092556 ],

[ 10.6926501976 , 5.6926497208 , 2.71092556 ],

[ 14.3073505176 , 5.6926497208 , 2.71092556 ],

[ 12.5000003576 , 7.4999998808 , 2.71092556 ],

[ 10.6926501976 , 9.3073500408 , 2.71092556 ],

[ 14.3073505176 , 9.3073500408 , 2.71092556 ],

[ 12.5000003576 , 11.1147002008 , 2.71092556 ],

[ 10.6926501976 , 3.8852998008 , 4.51827571 ],

[ 14.3073505176 , 3.8852998008 , 4.51827571 ],

[ 12.5000003576 , 5.6926497208 , 4.51827571 ],

[ 10.6926501976 , 7.4999998808 , 4.51827571 ],

[ 14.3073505176 , 7.4999998808 , 4.51827571 ],

[ 12.5000003576 , 9.3073500408 , 4.51827571 ],

[ 10.6926501976 , 11.1147002008 , 4.51827571 ],

[ 14.3073505176 , 11.1147002008 , 4.51827571 ],

[ 12.5000003576 , 3.8852998008 , 6.32562587 ],

[ 10.6926501976 , 5.6926497208 , 6.32562587 ],

[ 14.3073505176 , 5.6926497208 , 6.32562587 ],

[ 12.5000003576 , 7.4999998808 , 6.32562587 ],

[ 10.6926501976 , 9.3073500408 , 6.32562587 ],

[ 14.3073505176 , 9.3073500408 , 6.32562587 ],

[ 12.5000003576 , 11.1147002008 , 6.32562587 ],

[ 17.5967715978 , 9.3386067152 , 8.3295234528 ],

[ 12.4982122183 , 9.338783145 , 8.3295234528 ],

[ 15.0474427938 , 9.338783145 , 8.3295234528 ],

[ 7.4022172689 , 4.92195642 , 8.3305248108 ],

[ 8.6758559942 , 7.1302813292 , 8.3305248108 ],

[ 16.3218616247 , 7.1303704977 , 8.3305248108 ],

[ 11.2250322103 , 7.1307233572 , 8.3305248108 ],

[ 13.7725824117 , 7.1308115721 , 8.3305248108 ],

[ 7.4001153707 , 9.337459445 , 8.3305248108 ],

[ 9.9483741522 , 9.3377236128 , 8.3305248108 ],

[ 9.9506295919 , 4.9216035605 , 8.3315242615 ],

[ 18.8701728582 , 7.1298402548 , 8.3315242615 ],

[ 6.1271384954 , 7.1308115721 , 8.3315242615 ],

[ 2.3052273988 , 9.3372820616 , 8.3315242615 ],

[ 20.1456416845 , 9.3378123045 , 8.3315242615 ],

[ 12.4977124929 , 4.9221333265 , 8.3325237122 ],

[ 15.0472024679 , 4.923104167 , 8.3325237122 ],

[ 17.5956119299 , 4.9234575033 , 8.3325237122 ],

[ 1.0317283869 , 11.5441082716 , 8.3325237122 ],

[ 4.8536013365 , 4.9226626158 , 8.3335250702 ],

[ 4.8526204824 , 9.3372820616 , 8.3335250702 ],

[ 18.8703616857 , 11.5448979139 , 8.3335250702 ],

[ 16.3215926885 , 11.5455187559 , 8.3335250702 ],

[ 22.6925929784 , 4.9235452414 , 8.3345245209 ],

[ 3.5791333914 , 7.1301053763 , 8.3345245209 ],

[ 8.6743663549 , 11.5436686277 , 8.3345245209 ],

[ 11.2236922979 , 11.5448979139 , 8.3345245209 ],

[ 20.1432632208 , 4.9233692885 , 8.3355239716 ],

[ 3.5811084509 , 11.5424288511 , 8.3355239716 ],

[ 6.1270755529 , 11.5431383848 , 8.3355239716 ],

[ 13.7718518972 , 11.5467585325 , 8.3355239716 ],

[ 21.4163917303 , 7.1290453673 , 8.3365234222 ],

[ 16.3254722357 , 8.6050871611 , 10.3975204315 ],

[ 7.4034365415 , 6.3877586126 , 10.3985198822 ],

[ 18.8768924474 , 8.6034106016 , 10.3985198822 ],

[ 13.7747119665 , 8.6052645445 , 10.3985198822 ],

[ 9.9537853002 , 6.3889945746 , 10.3995193329 ],

[ 11.2250322103 , 8.6035870314 , 10.3995193329 ],

[ 8.6741193533 , 8.6019095183 , 10.4005206909 ],

[ 15.0479120016 , 6.3922604323 , 10.4025195923 ],

[ 12.5008720159 , 6.3902305365 , 10.4035209503 ],

[ 4.8547695875 , 6.3913773298 , 10.4055198517 ],

[ 17.5979522466 , 6.3919075728 , 10.4055198517 ],

[ 6.124993205 , 8.6024397612 , 10.4055198517 ],

[ 8.6783117056 , 4.1820815802 , 10.4065193024 ],

[ 21.4235728979 , 8.6018217802 , 10.4065193024 ],

[ 17.5978416204 , 10.8099688292 , 10.4065193024 ],

[ 15.0470327139 , 10.8105887175 , 10.4065193024 ],

[ 6.1300524473 , 4.1825236082 , 10.4075206604 ],

[ 13.77498281 , 4.1855243445 , 10.4075206604 ],

[ 9.9520400762 , 10.808118701 , 10.4075206604 ],

[ 20.1480315923 , 10.8086479902 , 10.4075206604 ],

[ 16.3233932256 , 4.1862305403 , 10.4085201111 ],

[ 3.5769883394 , 8.6006735563 , 10.4085201111 ],

[ 2.3083823919 , 10.8060883284 , 10.4085201111 ],

[ 12.4992822408 , 10.8076781035 , 10.4085201111 ],

[ 11.226362586 , 4.1837595701 , 10.4095195618 ],

[ 23.9682716131 , 4.1861423254 , 10.4105209198 ],

[ 21.4196132421 , 4.1876434088 , 10.4105209198 ],

[ 22.6926330328 , 6.3927901983 , 10.4115203705 ],

[ 7.401640296 , 10.8059080839 , 10.4115203705 ],

[ 18.8695625066 , 4.1894096136 , 10.4155200806 ],

[ 20.1413730383 , 6.3917301893 , 10.4155200806 ],

[ 4.8580693006 , 10.8042286635 , 10.4165195312 ],

[ 17.6028426885 , 7.8792494536 , 12.4435199585 ],

[ 7.4003232717 , 7.8543542624 , 12.4455207672 ],

[ 15.0510619878 , 7.8713043928 , 12.4475196686 ],

[ 9.9517930746 , 7.8621233702 , 12.4485210266 ],

[ 12.5014823675 , 7.8676842451 , 12.4485210266 ],

[ 8.68472898 , 5.6544164419 , 12.4695209351 ],

[ 16.3181327581 , 10.0786579847 , 12.4715198364 ],

[ 16.315292716 , 5.6593593359 , 12.4725192871 ],

[ 4.850279212 , 7.8617705107 , 12.4725192871 ],

[ 20.1516631841 , 7.8707741499 , 12.4725192871 ],

[ 6.1308635473 , 5.6543272734 , 12.4735206451 ],

[ 8.6862453222 , 10.0728281736 , 12.4745200958 ],

[ 18.8722518682 , 10.0786579847 , 12.4745200958 ],

[ 11.2296222448 , 5.6594485045 , 12.4775203552 ],

[ 13.7753823995 , 5.6615666151 , 12.4795192566 ],

[ 13.7727721929 , 10.0747784376 , 12.4795192566 ],

[ 11.2267020941 , 10.0721281767 , 12.4815200653 ],

[ 12.5062822103 , 3.4577444792 , 12.4845203247 ],

[ 7.4079812765 , 3.4532414675 , 12.4855197754 ],

[ 17.5894016027 , 3.4532414675 , 12.4865211334 ],

[ 22.6909126043 , 3.4532414675 , 12.4865211334 ],

[ 1.0334143638 , 10.0746887922 , 12.4865211334 ],

[ 3.581941247 , 5.6576822996 , 12.4875205841 ],

[ 15.0485318899 , 3.4532414675 , 12.4895194855 ],

[ 20.1410716772 , 3.4532414675 , 12.4895194855 ],

[ 9.9574121237 , 3.453594327 , 12.4895194855 ],

[ 4.855898261 , 3.4532414675 , 12.4905208435 ],

[ 3.5851904154 , 10.0723885298 , 12.4915202942 ],

[ 21.4170516729 , 5.6589182615 , 12.4925197449 ],

[ 2.3069642782 , 7.8663605452 , 12.4925197449 ],

[ 18.8651832342 , 5.6610373259 , 12.5005210724 ],

[ 6.1369675398 , 10.0718582869 , 12.5005210724 ],

[ 19.5994724035 , 8.3293017149 , 15.2635196533 ],

[ 5.3906463384 , 7.4332584143 , 15.2665199127 ],

[ 7.266028285 , 5.6183093786 , 15.3015197601 ],

[ 17.7235816717 , 10.1437186003 , 15.311519989 ],

[ 18.5279124975 , 8.1502693892 , 15.3155196991 ],

[ 6.4621514082 , 7.6120256186 , 15.3175205078 ],

[ 9.9774373769 , 5.4150885344 , 15.3295196381 ],

[ 17.8968318701 , 6.3442362547 , 15.3355201569 ],

[ 12.4450124502 , 5.3792475462 , 15.3395198669 ],

[ 7.4641383886 , 6.6904705763 , 15.3395198669 ],

[ 7.0937441587 , 9.4175289869 , 15.3415206757 ],

[ 15.0124725103 , 10.3460587263 , 15.3415206757 ],

[ 17.5255721807 , 9.0713833571 , 15.3455203857 ],

[ 14.9114221334 , 5.3143614531 , 15.3505195465 ],

[ 12.5454124212 , 10.3817280531 , 15.3515209045 ],

[ 9.9966491461 , 6.5061415434 , 15.3605197754 ],

[ 10.0795120001 , 10.4467886686 , 15.3625205841 ],

[ 12.467642188 , 6.4707411528 , 15.3665202942 ],

[ 14.993522048 , 9.2549170256 , 15.3675197449 ],

[ 12.5226320028 , 9.2901400328 , 15.3735202637 ],

[ 14.9397023916 , 6.4045313597 , 15.3805202332 ],

[ 11.2498019933 , 7.1785701513 , 15.386520752 ],

[ 8.8035310507 , 7.2244762182 , 15.386520752 ],

[ 10.0510219335 , 9.3566149473 , 15.386520752 ],

[ 16.1864818334 , 8.5368469954 , 15.3895210114 ],

[ 13.7406724691 , 8.582311511 , 15.3895210114 ],

[ 13.7089723348 , 7.1293982267 , 15.3915199127 ],

[ 11.2813028097 , 8.6314829588 , 15.3945201721 ],

[ 16.1298621893 , 7.0992072821 , 15.4015201416 ],

[ 8.8606122732 , 8.6620281935 , 15.4035209503 ],

[ 13.1944 , 9.007189960267, 18.4203265991 ],

[ 13.1944 , 7.199839801567, 20.2276767578 ],

[ 11.3870498413 , 9.007189960267, 20.2276767578 ],

[ 15.0017501587 , 9.007189960267, 20.2276767578 ],

[ 13.1944 , 10.814540118967, 20.2276767578 ],

[ 13.1944 , 5.392489881267, 22.0350269165 ],

[ 11.3870498413 , 7.199839801567, 22.0350269165 ],

[ 15.0017501587 , 7.199839801567, 22.0350269165 ],

[ 13.1944 , 9.007189960267, 22.0350269165 ],

[ 11.3870498413 , 10.814540118967, 22.0350269165 ],

[ 15.0017501587 , 10.814540118967, 22.0350269165 ],

[ 13.1944 , 12.621890277667, 22.0350269165 ],

[ 11.3870498413 , 5.392489881267, 23.8423770752 ],

[ 15.0017501587 , 5.392489881267, 23.8423770752 ],

[ 13.1944 , 7.199839801567, 23.8423770752 ],

[ 11.3870498413 , 9.007189960267, 23.8423770752 ],

[ 15.0017501587 , 9.007189960267, 23.8423770752 ],

[ 13.1944 , 10.814540118967, 23.8423770752 ],

[ 11.3870498413 , 12.621890277667, 23.8423770752 ],

[ 15.0017501587 , 12.621890277667, 23.8423770752 ],

[ 13.1944 , 5.392489881267, 25.6497272339 ],

[ 11.3870498413 , 7.199839801567, 25.6497272339 ],

[ 15.0017501587 , 7.199839801567, 25.6497272339 ],

[ 13.1944 , 9.007189960267, 25.6497272339 ],

[ 11.3870498413 , 10.814540118967, 25.6497272339 ],

[ 15.0017501587 , 10.814540118967, 25.6497272339 ],

[ 13.1944 , 12.621890277667, 25.6497272339 ],

[ 11.3870498413 , 5.392489881267, 27.4570773926 ],

[ 15.0017501587 , 5.392489881267, 27.4570773926 ],

[ 13.1944 , 7.199839801567, 27.4570773926 ],

[ 11.3870498413 , 9.007189960267, 27.4570773926 ],

[ 15.0017501587 , 9.007189960267, 27.4570773926 ],

[ 13.1944 , 10.814540118967, 27.4570773926 ],

[ 11.3870498413 , 12.621890277667, 27.4570773926 ],

[ 15.0017501587 , 12.621890277667, 27.4570773926 ],

[ 13.1944 , 5.392489881267, 29.2644275513 ],

[ 11.3870498413 , 7.199839801567, 29.2644275513 ],

[ 15.0017501587 , 7.199839801567, 29.2644275513 ],

[ 13.1944 , 9.007189960267, 29.2644275513 ],

[ 11.3870498413 , 10.814540118967, 29.2644275513 ],

[ 15.0017501587 , 10.814540118967, 29.2644275513 ],

[ 13.1944 , 12.621890277667, 29.2644275513 ]]*Angstrom

# Set up configuration

central_region = BulkConfiguration(

bravais_lattice=central_region_lattice,

elements=central_region_elements,

cartesian_coordinates=central_region_coordinates

)

device_configuration = DeviceConfiguration(

central_region,

[left_electrode, right_electrode],

equivalent_electrode_lengths=[7.22940064, 7.2293930054]*Angstrom,

transverse_electrode_repetitions=[[1, 1], [1, 1]],

)

# -------------------------------------------------------------

# Calculator

# -------------------------------------------------------------

#----------------------------------------

# Basis Set

#----------------------------------------

basis_set = [

GGABasis.Hydrogen_DoubleZetaDoublePolarized,

GGABasis.Carbon_DoubleZetaDoublePolarized,

GGABasis.Copper_DoubleZetaDoublePolarized,

GGABasis.Selenium_DoubleZetaDoublePolarized,

]

#----------------------------------------

# Numerical Accuracy Settings

#----------------------------------------

device_k_point_sampling = MonkhorstPackGrid(

na=2,

nc=261,

)

device_numerical_accuracy_parameters = NumericalAccuracyParameters(

density_mesh_cutoff=100.0*Hartree,

k_point_sampling=device_k_point_sampling,

)

#----------------------------------------

# Contour Integral Settings

#----------------------------------------

equilibrium_contour = SemiCircleContour(

integral_lower_bound=1.84481605655*Hartree,

circle_points=30,

)

contour_parameters = ContourParameters(

equilibrium_contour=equilibrium_contour,

)

#----------------------------------------

# Device Calculator

#----------------------------------------

calculator = DeviceLCAOCalculator(

basis_set=basis_set,

numerical_accuracy_parameters=device_numerical_accuracy_parameters,

contour_parameters=contour_parameters,

)

device_configuration.setCalculator(calculator)

nlprint(device_configuration)

nlsave('Re-phy-Cu-ADS-Cu-b4-012-012.hdf5', device_configuration)

# -------------------------------------------------------------

# IV Characteristics

# -------------------------------------------------------------

# Kpoint sampling

kpoint_grid = MonkhorstPackGrid(

na=2,

)

# Gate-source voltages

gate_source_voltages = numpy.linspace(0, 0, 1)*Volt

# Drain-source voltages

drain_source_voltages = numpy.linspace(-0.12, 0.12, 3)*Volt

# File name.

filename = 'Re-phy-Cu-ADS-Cu-b4-012-012.hdf5'

iv_characteristics = IVCharacteristics(

configuration=device_configuration,

filename=filename,

object_id='ivcharacteristics',

gate_regions=[],

gate_source_voltages=gate_source_voltages,

drain_source_voltages=drain_source_voltages,

energies=None,

kpoints=kpoint_grid,

self_energy_calculator=RecursionSelfEnergy(),

energy_zero_parameter=AverageFermiLevel,

infinitesimal=1e-06*eV,

log_filename_prefix='ivcharacteristics_',

number_of_processes_per_task=None,

enforce_zero_transmission_in_band_gap=True,

)

iv_characteristics.update()

**chem-Cu-ADS-Cu-*b*4.py**

# -*- coding: utf-8 -*-

# -------------------------------------------------------------

# Two-probe Configuration

# -------------------------------------------------------------

# -------------------------------------------------------------

# Left Electrode

# -------------------------------------------------------------

# Set up lattice

vector_a = [25.0, 0.0, 0.0]*Angstrom

vector_b = [0.0, 15.0, 0.0]*Angstrom

vector_c = [0.0, 0.0, 3.61470032]*Angstrom

left_electrode_lattice = UnitCell(vector_a, vector_b, vector_c)

# Define elements

left_electrode_elements = [Copper, Copper, Copper, Copper, Copper, Copper, Copper, Copper,

Copper, Copper, Copper, Copper, Copper, Copper, Copper]

# Define coordinates

left_electrode_coordinates = [[ 10.6926496004 , 3.88530015845, 0.9035754 ],

[ 14.3073499204 , 3.88530015845, 0.9035754 ],

[ 12.4999997604 , 5.69265007845, 0.9035754 ],

[ 10.6926496004 , 7.50000023845, 0.9035754 ],

[ 14.3073499204 , 7.50000023845, 0.9035754 ],

[ 12.4999997604 , 9.30735039845, 0.9035754 ],

[ 10.6926496004 , 11.11470055845, 0.9035754 ],

[ 14.3073499204 , 11.11470055845, 0.9035754 ],

[ 12.4999997604 , 3.88530015845, 2.71092556 ],

[ 10.6926496004 , 5.69265007845, 2.71092556 ],

[ 14.3073499204 , 5.69265007845, 2.71092556 ],

[ 12.4999997604 , 7.50000023845, 2.71092556 ],

[ 10.6926496004 , 9.30735039845, 2.71092556 ],

[ 14.3073499204 , 9.30735039845, 2.71092556 ],

[ 12.4999997604 , 11.11470055845, 2.71092556 ]]*Angstrom

# Set up configuration

left_electrode = BulkConfiguration(

bravais_lattice=left_electrode_lattice,

elements=left_electrode_elements,

cartesian_coordinates=left_electrode_coordinates

)

# -------------------------------------------------------------

# Right Electrode

# -------------------------------------------------------------

# Set up lattice

vector_a = [25.0, 0.0, 0.0]*Angstrom

vector_b = [0.0, 15.0, 0.0]*Angstrom

vector_c = [0.0, 0.0, 3.6146965027]*Angstrom

right_electrode_lattice = UnitCell(vector_a, vector_b, vector_c)

# Define elements

right_electrode_elements = [Copper, Copper, Copper, Copper, Copper, Copper, Copper, Copper,

Copper, Copper, Copper, Copper, Copper, Copper, Copper]

# Define coordinates

right_electrode_coordinates = [[ 11.3870498413 , 5.392489881267, 0.9037728546 ],

[ 15.0017501587 , 5.392489881267, 0.9037728546 ],

[ 13.1944 , 7.199839801567, 0.9037728546 ],

[ 11.3870498413 , 9.007189960267, 0.9037728546 ],

[ 15.0017501587 , 9.007189960267, 0.9037728546 ],

[ 13.1944 , 10.814540118967, 0.9037728546 ],

[ 11.3870498413 , 12.621890277667, 0.9037728546 ],

[ 15.0017501587 , 12.621890277667, 0.9037728546 ],

[ 13.1944 , 5.392489881267, 2.7111230133 ],

[ 11.3870498413 , 7.199839801567, 2.7111230133 ],

[ 15.0017501587 , 7.199839801567, 2.7111230133 ],

[ 13.1944 , 9.007189960267, 2.7111230133 ],

[ 11.3870498413 , 10.814540118967, 2.7111230133 ],

[ 15.0017501587 , 10.814540118967, 2.7111230133 ],

[ 13.1944 , 12.621890277667, 2.7111230133 ]]*Angstrom

# Set up configuration

right_electrode = BulkConfiguration(

bravais_lattice=right_electrode_lattice,

elements=right_electrode_elements,

cartesian_coordinates=right_electrode_coordinates

)

# -------------------------------------------------------------

# Central Region

# -------------------------------------------------------------

# Set up lattice

vector_a = [25.0, 0.0, 0.0]*Angstrom

vector_b = [0.0, 15.0, 0.0]*Angstrom

vector_c = [0.0, 0.0, 30.167997226]*Angstrom

central_region_lattice = UnitCell(vector_a, vector_b, vector_c)

# Define elements

central_region_elements = [Copper, Copper, Copper, Copper, Copper, Copper, Copper, Copper,

Copper, Copper, Copper, Copper, Copper, Copper, Copper, Copper,

Copper, Copper, Copper, Copper, Copper, Copper, Copper, Copper,

Copper, Copper, Copper, Copper, Copper, Copper, Copper, Copper,

Copper, Copper, Copper, Copper, Copper, Copper, Copper, Copper,

Copper, Copper, Copper, Copper, Copper, Copper, Copper, Copper,

Copper, Copper, Copper, Copper, Copper, Copper, Copper, Copper,

Copper, Copper, Copper, Copper, Copper, Copper, Copper, Copper,

Copper, Copper, Copper, Copper, Copper, Copper, Copper, Copper,

Copper, Copper, Copper, Copper, Copper, Copper, Copper, Copper,

Copper, Copper, Copper, Copper, Copper, Copper, Copper, Copper,

Copper, Copper, Copper, Copper, Copper, Copper, Copper, Copper,

Copper, Copper, Copper, Copper, Copper, Copper, Copper, Copper,

Copper, Copper, Copper, Copper, Copper, Copper, Copper, Copper,

Copper, Copper, Copper, Copper, Copper, Copper, Copper, Copper,

Copper, Copper, Copper, Copper, Copper, Copper, Carbon, Carbon,

Carbon, Carbon, Carbon, Carbon, Carbon, Hydrogen, Carbon, Hydrogen,

Carbon, Hydrogen, Hydrogen, Carbon, Hydrogen, Carbon, Hydrogen,

Carbon, Selenium, Selenium, Carbon, Carbon, Carbon, Carbon, Carbon,

Carbon, Hydrogen, Hydrogen, Hydrogen, Hydrogen, Copper, Copper,

Copper, Copper, Copper, Copper, Copper, Copper, Copper, Copper,

Copper, Copper, Copper, Copper, Copper, Copper, Copper, Copper,

Copper, Copper, Copper, Copper, Copper, Copper, Copper, Copper,

Copper, Copper, Copper, Copper, Copper, Copper, Copper, Copper,

Copper, Copper, Copper, Copper, Copper, Copper, Copper, Copper]

# Define coordinates

central_region_coordinates = [[ 10.6926496004 , 3.88530015845 , 0.9035754 ],

[ 14.3073499204 , 3.88530015845 , 0.9035754 ],

[ 12.4999997604 , 5.69265007845 , 0.9035754 ],

[ 10.6926496004 , 7.50000023845 , 0.9035754 ],

[ 14.3073499204 , 7.50000023845 , 0.9035754 ],

[ 12.4999997604 , 9.30735039845 , 0.9035754 ],

[ 10.6926496004 , 11.11470055845 , 0.9035754 ],

[ 14.3073499204 , 11.11470055845 , 0.9035754 ],

[ 12.4999997604 , 3.88530015845 , 2.71092556 ],

[ 10.6926496004 , 5.69265007845 , 2.71092556 ],

[ 14.3073499204 , 5.69265007845 , 2.71092556 ],

[ 12.4999997604 , 7.50000023845 , 2.71092556 ],

[ 10.6926496004 , 9.30735039845 , 2.71092556 ],

[ 14.3073499204 , 9.30735039845 , 2.71092556 ],

[ 12.4999997604 , 11.11470055845 , 2.71092556 ],

[ 10.6926496004 , 3.88530015845 , 4.51827571 ],

[ 14.3073499204 , 3.88530015845 , 4.51827571 ],

[ 12.4999997604 , 5.69265007845 , 4.51827571 ],

[ 10.6926496004 , 7.50000023845 , 4.51827571 ],

[ 14.3073499204 , 7.50000023845 , 4.51827571 ],

[ 12.4999997604 , 9.30735039845 , 4.51827571 ],

[ 10.6926496004 , 11.11470055845 , 4.51827571 ],

[ 14.3073499204 , 11.11470055845 , 4.51827571 ],

[ 12.4999997604 , 3.88530015845 , 6.32562587 ],

[ 10.6926496004 , 5.69265007845 , 6.32562587 ],

[ 14.3073499204 , 5.69265007845 , 6.32562587 ],

[ 12.4999997604 , 7.50000023845 , 6.32562587 ],

[ 10.6926496004 , 9.30735039845 , 6.32562587 ],

[ 14.3073499204 , 9.30735039845 , 6.32562587 ],

[ 12.4999997604 , 11.11470055845 , 6.32562587 ],

[ 3.5799309611 , 11.55716919905 , 8.3275264587 ],

[ 15.0424889922 , 9.34946560865 , 8.3295253601 ],

[ 8.6729840636 , 11.56228852275 , 8.3295253601 ],

[ 11.2219085097 , 11.56317830085 , 8.3295253601 ],

[ 12.4971389175 , 9.34840607645 , 8.3305267181 ],

[ 6.1268658042 , 11.56008839615 , 8.3305267181 ],

[ 7.4030150771 , 9.34725880625 , 8.3315261688 ],

[ 2.3047119975 , 9.34911274915 , 8.3315261688 ],

[ 18.8709697127 , 11.55831837655 , 8.3315261688 ],

[ 13.7716493011 , 11.56228852275 , 8.3315261688 ],

[ 9.9510316253 , 4.93961262705 , 8.3325256195 ],

[ 4.8561820388 , 9.34734654425 , 8.3325256195 ],

[ 17.592489183 , 9.34955334665 , 8.3325256195 ],

[ 20.1437987685 , 9.35052514075 , 8.3325256195 ],

[ 16.3206691146 , 11.55911850935 , 8.3325256195 ],

[ 1.0331498981 , 11.55964875225 , 8.3325256195 ],

[ 9.9480122924 , 9.34611058235 , 8.3335269775 ],

[ 22.6923789382 , 4.93696475035 , 8.3345264282 ],

[ 4.8549208045 , 4.93731760985 , 8.3345264282 ],

[ 7.4022120833 , 4.93996596335 , 8.3345264282 ],

[ 3.5815238357 , 7.14255261425 , 8.3345264282 ],

[ 20.1435584426 , 4.93908381465 , 8.3355258789 ],

[ 17.5950984359 , 4.94058394435 , 8.3355258789 ],

[ 6.1295790076 , 7.14211153985 , 8.3355258789 ],

[ 18.8674086928 , 7.14202284815 , 8.3365253296 ],

[ 12.4989890456 , 4.94323277475 , 8.3375266876 ],

[ 15.0471991897 , 4.94393897055 , 8.3375266876 ],

[ 21.4148597121 , 7.14193463325 , 8.3375266876 ],

[ 8.6792153716 , 7.14105153085 , 8.339525589 ],

[ 11.2287492156 , 7.14193463325 , 8.339525589 ],

[ 16.3195590377 , 7.14069867135 , 8.3435252991 ],

[ 13.7724189162 , 7.14131665235 , 8.3445266571 ],

[ 9.9445418716 , 10.81861901285 , 10.3835281219 ],

[ 12.4942788482 , 10.82444882395 , 10.3865283813 ],

[ 7.3989838958 , 10.81438851355 , 10.3915275421 ],

[ 8.6754521728 , 4.19232296945 , 10.3925289001 ],

[ 15.0467690826 , 10.82656884195 , 10.3935283508 ],

[ 4.85342592 , 10.81367897995 , 10.3955272522 ],

[ 18.8749980331 , 8.61868405345 , 10.4005283203 ],

[ 17.6007880569 , 10.82532906535 , 10.4005283203 ],

[ 2.3080720305 , 10.81685853005 , 10.401527771 ],

[ 11.2252387404 , 4.20123887065 , 10.4035285797 ],

[ 16.3124694228 , 8.61912465095 , 10.4035285797 ],

[ 20.1508292556 , 10.82391858105 , 10.4035285797 ],

[ 3.5782069564 , 8.61162114145 , 10.4045280304 ],

[ 13.7743186355 , 4.20750689505 , 10.4065288391 ],

[ 22.6971186996 , 6.40797495845 , 10.4075282898 ],

[ 6.1288227439 , 4.20088553435 , 10.4085277405 ],

[ 23.9680690169 , 4.20097374915 , 10.4085277405 ],

[ 16.3220691085 , 4.20865464215 , 10.4085277405 ],

[ 21.4198493362 , 8.61426949505 , 10.4085277405 ],

[ 21.420368135 , 4.20397591595 , 10.4095290985 ],

[ 4.8575667739 , 6.40488457685 , 10.4125274506 ],

[ 6.1290659308 , 8.60738396645 , 10.4125274506 ],

[ 11.2245187163 , 8.61117959025 , 10.4125274506 ],

[ 13.7693585753 , 8.61524033545 , 10.4135288086 ],

[ 18.8718585372 , 4.20768380165 , 10.4145282593 ],

[ 8.6706475616 , 8.60508751875 , 10.4185279694 ],

[ 9.9620370269 , 6.40717959405 , 10.4205287781 ],

[ 7.4011368156 , 6.41044688225 , 10.4205287781 ],

[ 20.141158998 , 6.40656256675 , 10.4235290375 ],

[ 17.5994796157 , 6.40444350245 , 10.4285281982 ],

[ 15.0432690978 , 6.41159367565 , 10.4465278473 ],

[ 12.5025491118 , 6.41097664835 , 10.448528656 ],

[ 8.6872720122 , 5.64647078515 , 12.4315284576 ],

[ 17.5970286727 , 7.91191363335 , 12.434528717 ],

[ 12.503269136 , 3.43682169915 , 12.4465278473 ],

[ 13.7715491653 , 10.12773919105 , 12.447527298 ],

[ 15.0574387908 , 3.44732785225 , 12.448528656 ],

[ 11.2188491225 , 10.11361908915 , 12.4495281067 ],

[ 9.947875917 , 3.44538474085 , 12.4565280762 ],

[ 16.3248996139 , 10.11529850965 , 12.4595283356 ],

[ 8.6783398986 , 10.09710907935 , 12.4635280457 ],

[ 17.5960196853 , 3.46613073355 , 12.4665283051 ],

[ 7.4027771354 , 3.45624375345 , 12.4695285645 ],

[ 18.8733691573 , 10.10107827185 , 12.4715274658 ],

[ 6.1242699027 , 10.09066891675 , 12.4725288239 ],

[ 4.8411001563 , 7.87766051295 , 12.4795287933 ],

[ 9.9422063232 , 7.89178586005 , 12.4795287933 ],

[ 20.1558493972 , 3.46966171265 , 12.480528244 ],

[ 20.1448783279 , 7.89063763625 , 12.4815276947 ],

[ 3.5783550143 , 10.08351826675 , 12.4835285034 ],

[ 21.4328498244 , 5.67675185205 , 12.4845279541 ],

[ 1.0319309831 , 10.08924889565 , 12.4845279541 ],

[ 4.8559951186 , 3.46613073355 , 12.4865287628 ],

[ 2.3037478328 , 7.88110375405 , 12.4875282135 ],

[ 3.5876440406 , 5.67321991925 , 12.4885276642 ],

[ 22.6995696425 , 3.47213363655 , 12.4895290222 ],

[ 6.1311640143 , 5.66333270075 , 12.4895290222 ],

[ 11.2323693633 , 5.64161562925 , 12.4905284729 ],

[ 15.0495786071 , 7.92506670955 , 12.4905284729 ],

[ 16.3312396407 , 5.66633391385 , 12.4955276337 ],

[ 12.4942387939 , 7.92612671855 , 12.4975284424 ],

[ 7.3850778937 , 7.88640093805 , 12.5115283813 ],

[ 13.782109201 , 5.64143872265 , 12.5155280914 ],

[ 18.8853091598 , 5.66854071625 , 12.5215286102 ],

[ 12.9113587737 , 8.13729310035 , 14.6945289459 ],

[ 13.0834893584 , 5.30659270285 , 14.7055286255 ],

[ 14.2906188369 , 6.06438851355 , 14.7895282593 ],

[ 14.2116689086 , 7.51756691935 , 14.8045276489 ],

[ 11.7043790221 , 7.37817263605 , 14.8075279083 ],

[ 11.7805384994 , 5.92631888395 , 14.8165286865 ],

[ 15.5819491744 , 5.43795371055 , 14.8685287323 ],

[ 13.1451587081 , 4.23010659225 , 14.8795284119 ],

[ 10.417589128 , 8.00381302835 , 14.8825286713 ],

[ 12.8526391387 , 9.21148419385 , 14.8825286713 ],

[ 15.3983086944 , 8.28154206275 , 14.9235290375 ],

[ 15.6352185607 , 4.35131478315 , 14.9445289459 ],

[ 10.3650893569 , 9.09159970285 , 14.948528656 ],

[ 10.596439302 , 5.16322684295 , 14.9615272369 ],

[ 15.3206786513 , 9.36659169205 , 15.012527832 ],

[ 16.7231788039 , 6.23574090005 , 15.0285285797 ],

[ 10.6747292876 , 4.07702851295 , 15.0385288086 ],

[ 9.2784489989 , 7.20770382885 , 15.0655273285 ],

[ 18.5574797988 , 5.63216996195 , 15.0765289154 ],

[ 7.4520000815 , 7.82098460205 , 15.0765289154 ],

[ 16.6632880569 , 7.65307688715 , 15.0855277863 ],

[ 9.33115381 , 5.79116177565 , 15.1165279236 ],

[ 17.938159883 , 8.30096364025 , 15.2335285034 ],

[ 8.0496606231 , 5.14910197265 , 15.2535289612 ],

[ 6.9623531699 , 5.97760987285 , 15.2735275116 ],

[ 19.0282687545 , 7.47607493405 , 15.2755283203 ],

[ 18.033359468 , 9.38680768015 , 15.2845290985 ],

[ 7.9491547942 , 4.06396365165 , 15.3125289764 ],

[ 20.0781096816 , 7.74285674095 , 15.3655284729 ],

[ 5.9118980765 , 5.71859574325 , 15.3735278931 ],

[ 13.1944 , 9.007189960267, 18.4203265991 ],

[ 13.1944 , 7.199839801567, 20.2276767578 ],

[ 11.3870498413 , 9.007189960267, 20.2276767578 ],

[ 15.0017501587 , 9.007189960267, 20.2276767578 ],

[ 13.1944 , 10.814540118967, 20.2276767578 ],

[ 13.1944 , 5.392489881267, 22.0350269165 ],

[ 11.3870498413 , 7.199839801567, 22.0350269165 ],

[ 15.0017501587 , 7.199839801567, 22.0350269165 ],

[ 13.1944 , 9.007189960267, 22.0350269165 ],

[ 11.3870498413 , 10.814540118967, 22.0350269165 ],

[ 15.0017501587 , 10.814540118967, 22.0350269165 ],

[ 13.1944 , 12.621890277667, 22.0350269165 ],

[ 11.3870498413 , 5.392489881267, 23.8423770752 ],

[ 15.0017501587 , 5.392489881267, 23.8423770752 ],

[ 13.1944 , 7.199839801567, 23.8423770752 ],

[ 11.3870498413 , 9.007189960267, 23.8423770752 ],

[ 15.0017501587 , 9.007189960267, 23.8423770752 ],

[ 13.1944 , 10.814540118967, 23.8423770752 ],

[ 11.3870498413 , 12.621890277667, 23.8423770752 ],

[ 15.0017501587 , 12.621890277667, 23.8423770752 ],

[ 13.1944 , 5.392489881267, 25.6497272339 ],

[ 11.3870498413 , 7.199839801567, 25.6497272339 ],

[ 15.0017501587 , 7.199839801567, 25.6497272339 ],

[ 13.1944 , 9.007189960267, 25.6497272339 ],

[ 11.3870498413 , 10.814540118967, 25.6497272339 ],

[ 15.0017501587 , 10.814540118967, 25.6497272339 ],

[ 13.1944 , 12.621890277667, 25.6497272339 ],

[ 11.3870498413 , 5.392489881267, 27.4570773926 ],

[ 15.0017501587 , 5.392489881267, 27.4570773926 ],

[ 13.1944 , 7.199839801567, 27.4570773926 ],

[ 11.3870498413 , 9.007189960267, 27.4570773926 ],

[ 15.0017501587 , 9.007189960267, 27.4570773926 ],

[ 13.1944 , 10.814540118967, 27.4570773926 ],

[ 11.3870498413 , 12.621890277667, 27.4570773926 ],

[ 15.0017501587 , 12.621890277667, 27.4570773926 ],

[ 13.1944 , 5.392489881267, 29.2644275513 ],

[ 11.3870498413 , 7.199839801567, 29.2644275513 ],

[ 15.0017501587 , 7.199839801567, 29.2644275513 ],

[ 13.1944 , 9.007189960267, 29.2644275513 ],

[ 11.3870498413 , 10.814540118967, 29.2644275513 ],

[ 15.0017501587 , 10.814540118967, 29.2644275513 ],

[ 13.1944 , 12.621890277667, 29.2644275513 ]]*Angstrom

# Set up configuration

central_region = BulkConfiguration(

bravais_lattice=central_region_lattice,

elements=central_region_elements,

cartesian_coordinates=central_region_coordinates

)

device_configuration = DeviceConfiguration(

central_region,

[left_electrode, right_electrode],

equivalent_electrode_lengths=[7.22940064, 7.2293930054]*Angstrom,

transverse_electrode_repetitions=[[1, 1], [1, 1]],

)

# -------------------------------------------------------------

# Calculator

# -------------------------------------------------------------

#----------------------------------------

# Basis Set

#----------------------------------------

basis_set = [

GGABasis.Hydrogen_DoubleZetaPolarized,

GGABasis.Carbon_DoubleZetaPolarized,

GGABasis.Copper_DoubleZetaPolarized,

GGABasis.Selenium_DoubleZetaPolarized,

]

#----------------------------------------

# Numerical Accuracy Settings

#----------------------------------------

device_k_point_sampling = MonkhorstPackGrid(

na=2,

nc=261,

)

device_numerical_accuracy_parameters = NumericalAccuracyParameters(

density_mesh_cutoff=100.0*Hartree,

k_point_sampling=device_k_point_sampling,

)

#----------------------------------------

# Contour Integral Settings

#----------------------------------------

equilibrium_contour = SemiCircleContour(

integral_lower_bound=1.84481605655*Hartree,

circle_points=30,

)

contour_parameters = ContourParameters(

equilibrium_contour=equilibrium_contour,

)

#----------------------------------------

# Device Calculator

#----------------------------------------

calculator = DeviceLCAOCalculator(

basis_set=basis_set,

numerical_accuracy_parameters=device_numerical_accuracy_parameters,

contour_parameters=contour_parameters,

)

device_configuration.setCalculator(calculator)

nlprint(device_configuration)

nlsave('chem-Cu-ADS-Cu-b4-012-012.hdf5', device_configuration)

# -------------------------------------------------------------

# IV Characteristics

# -------------------------------------------------------------

# Kpoint sampling

kpoint_grid = KpointDensity(

density_a=7.0*Angstrom,

density_b=2.38732414638*Angstrom,

density_c=0.0*Angstrom,

)

# Gate-source voltages

gate_source_voltages = numpy.linspace(0, 0, 1)*Volt

# Drain-source voltages

drain_source_voltages = numpy.linspace(-0.12, 0.12, 3)*Volt

# File name.

filename = 'chem-Cu-ADS-Cu-b4-012-012.hdf5'

iv_characteristics = IVCharacteristics(

configuration=device_configuration,

filename=filename,

object_id='ivcharacteristics',

gate_regions=[],

gate_source_voltages=gate_source_voltages,

drain_source_voltages=drain_source_voltages,

energies=None,

kpoints=kpoint_grid,

self_energy_calculator=RecursionSelfEnergy(),

energy_zero_parameter=AverageFermiLevel,

infinitesimal=1e-06*eV,

log_filename_prefix='ivcharacteristics_',

number_of_processes_per_task=None,

enforce_zero_transmission_in_band_gap=True,

)

iv_characteristics.update()

**phys-Cu-ADS-Cu-*c*.py**

# -*- coding: utf-8 -*-

# -------------------------------------------------------------

# Two-probe Configuration

# -------------------------------------------------------------

# -------------------------------------------------------------

# Left Electrode

# -------------------------------------------------------------

# Set up lattice

vector_a = [25.0, 0.0, 0.0]*Angstrom

vector_b = [0.0, 15.0, 0.0]*Angstrom

vector_c = [0.0, 0.0, 3.61470032]*Angstrom

left_electrode_lattice = UnitCell(vector_a, vector_b, vector_c)

# Define elements

left_electrode_elements = [Copper, Copper, Copper, Copper, Copper, Copper, Copper, Copper,

Copper, Copper, Copper, Copper, Copper, Copper, Copper]

# Define coordinates

left_electrode_coordinates = [[ 10.6926501976, 3.8852998008, 0.9035754 ],

[ 14.3073505176, 3.8852998008, 0.9035754 ],

[ 12.5000003576, 5.6926497208, 0.9035754 ],

[ 10.6926501976, 7.4999998808, 0.9035754 ],

[ 14.3073505176, 7.4999998808, 0.9035754 ],

[ 12.5000003576, 9.3073500408, 0.9035754 ],

[ 10.6926501976, 11.1147002008, 0.9035754 ],

[ 14.3073505176, 11.1147002008, 0.9035754 ],

[ 12.5000003576, 3.8852998008, 2.71092556 ],

[ 10.6926501976, 5.6926497208, 2.71092556 ],

[ 14.3073505176, 5.6926497208, 2.71092556 ],

[ 12.5000003576, 7.4999998808, 2.71092556 ],

[ 10.6926501976, 9.3073500408, 2.71092556 ],

[ 14.3073505176, 9.3073500408, 2.71092556 ],

[ 12.5000003576, 11.1147002008, 2.71092556 ]]*Angstrom

# Set up configuration

left_electrode = BulkConfiguration(

bravais_lattice=left_electrode_lattice,

elements=left_electrode_elements,

cartesian_coordinates=left_electrode_coordinates

)

# -------------------------------------------------------------

# Right Electrode

# -------------------------------------------------------------

# Set up lattice

vector_a = [25.0, 0.0, 0.0]*Angstrom

vector_b = [0.0, 15.0, 0.0]*Angstrom

vector_c = [0.0, 0.0, 3.6146965027]*Angstrom

right_electrode_lattice = UnitCell(vector_a, vector_b, vector_c)

# Define elements

right_electrode_elements = [Copper, Copper, Copper, Copper, Copper, Copper, Copper, Copper,

Copper, Copper, Copper, Copper, Copper, Copper, Copper]

# Define coordinates

right_electrode_coordinates = [[ 10.6926501989, 3.8852998018, 0.9037766693],

[ 14.3073505163, 3.8852998018, 0.9037766693],

[ 12.5000003576, 5.6926497221, 0.9037766693],

[ 10.6926501989, 7.4999998808, 0.9037766693],

[ 14.3073505163, 7.4999998808, 0.9037766693],

[ 12.5000003576, 9.3073500395, 0.9037766693],

[ 10.6926501989, 11.1147001982, 0.9037766693],

[ 14.3073505163, 11.1147001982, 0.9037766693],

[ 12.5000003576, 3.8852998018, 2.711126828 ],

[ 10.6926501989, 5.6926497221, 2.711126828 ],

[ 14.3073505163, 5.6926497221, 2.711126828 ],

[ 12.5000003576, 7.4999998808, 2.711126828 ],

[ 10.6926501989, 9.3073500395, 2.711126828 ],

[ 14.3073505163, 9.3073500395, 2.711126828 ],

[ 12.5000003576, 11.1147001982, 2.711126828 ]]*Angstrom

# Set up configuration

right_electrode = BulkConfiguration(

bravais_lattice=right_electrode_lattice,

elements=right_electrode_elements,

cartesian_coordinates=right_electrode_coordinates

)

# -------------------------------------------------------------

# Central Region

# -------------------------------------------------------------

# Set up lattice

vector_a = [25.0, 0.0, 0.0]*Angstrom

vector_b = [0.0, 15.0, 0.0]*Angstrom

vector_c = [0.0, 0.0, 30.167997226]*Angstrom

central_region_lattice = UnitCell(vector_a, vector_b, vector_c)

# Define elements

central_region_elements = [Copper, Copper, Copper, Copper, Copper, Copper, Copper, Copper,

Copper, Copper, Copper, Copper, Copper, Copper, Copper, Copper,

Copper, Copper, Copper, Copper, Copper, Copper, Copper, Copper,

Copper, Copper, Copper, Copper, Copper, Copper, Copper, Copper,

Copper, Copper, Copper, Copper, Copper, Copper, Copper, Copper,

Copper, Copper, Copper, Copper, Copper, Copper, Copper, Copper,

Copper, Copper, Copper, Copper, Copper, Copper, Copper, Copper,

Copper, Copper, Copper, Copper, Copper, Copper, Copper, Copper,

Copper, Copper, Copper, Copper, Copper, Copper, Copper, Copper,

Copper, Copper, Copper, Copper, Copper, Copper, Copper, Copper,

Copper, Copper, Copper, Copper, Copper, Copper, Copper, Copper,

Copper, Copper, Copper, Copper, Copper, Copper, Copper, Copper,

Copper, Copper, Copper, Copper, Copper, Copper, Copper, Copper,

Copper, Copper, Copper, Copper, Copper, Copper, Copper, Copper,

Copper, Copper, Copper, Copper, Copper, Copper, Copper, Copper,

Copper, Copper, Copper, Copper, Copper, Copper, Hydrogen, Hydrogen,

Hydrogen, Hydrogen, Carbon, Carbon, Hydrogen, Selenium, Hydrogen,

Carbon, Selenium, Hydrogen, Carbon, Hydrogen, Hydrogen, Carbon,

Hydrogen, Carbon, Carbon, Carbon, Carbon, Carbon, Carbon, Carbon,

Carbon, Carbon, Carbon, Carbon, Carbon, Carbon, Copper, Copper,

Copper, Copper, Copper, Copper, Copper, Copper, Copper, Copper,

Copper, Copper, Copper, Copper, Copper, Copper, Copper, Copper,

Copper, Copper, Copper, Copper, Copper, Copper, Copper, Copper,

Copper, Copper, Copper, Copper, Copper, Copper, Copper, Copper,

Copper, Copper, Copper, Copper, Copper, Copper, Copper, Copper]

# Define coordinates

central_region_coordinates = [[ 10.6926501976, 3.8852998008, 0.9035754 ],

[ 14.3073505176, 3.8852998008, 0.9035754 ],

[ 12.5000003576, 5.6926497208, 0.9035754 ],

[ 10.6926501976, 7.4999998808, 0.9035754 ],

[ 14.3073505176, 7.4999998808, 0.9035754 ],

[ 12.5000003576, 9.3073500408, 0.9035754 ],

[ 10.6926501976, 11.1147002008, 0.9035754 ],

[ 14.3073505176, 11.1147002008, 0.9035754 ],

[ 12.5000003576, 3.8852998008, 2.71092556 ],

[ 10.6926501976, 5.6926497208, 2.71092556 ],

[ 14.3073505176, 5.6926497208, 2.71092556 ],

[ 12.5000003576, 7.4999998808, 2.71092556 ],

[ 10.6926501976, 9.3073500408, 2.71092556 ],

[ 14.3073505176, 9.3073500408, 2.71092556 ],

[ 12.5000003576, 11.1147002008, 2.71092556 ],

[ 10.6926501976, 3.8852998008, 4.51827571 ],

[ 14.3073505176, 3.8852998008, 4.51827571 ],

[ 12.5000003576, 5.6926497208, 4.51827571 ],

[ 10.6926501976, 7.4999998808, 4.51827571 ],

[ 14.3073505176, 7.4999998808, 4.51827571 ],

[ 12.5000003576, 9.3073500408, 4.51827571 ],

[ 10.6926501976, 11.1147002008, 4.51827571 ],

[ 14.3073505176, 11.1147002008, 4.51827571 ],

[ 12.5000003576, 3.8852998008, 6.32562587 ],

[ 10.6926501976, 5.6926497208, 6.32562587 ],

[ 14.3073505176, 5.6926497208, 6.32562587 ],

[ 12.5000003576, 7.4999998808, 6.32562587 ],

[ 10.6926501976, 9.3073500408, 6.32562587 ],

[ 14.3073505176, 9.3073500408, 6.32562587 ],

[ 12.5000003576, 11.1147002008, 6.32562587 ],

[ 17.5967715978, 9.3386067152, 8.3295234528],

[ 12.4982122183, 9.338783145 , 8.3295234528],

[ 15.0474427938, 9.338783145 , 8.3295234528],

[ 7.4022172689, 4.92195642 , 8.3305248108],

[ 8.6758559942, 7.1302813292, 8.3305248108],

[ 16.3218616247, 7.1303704977, 8.3305248108],

[ 11.2250322103, 7.1307233572, 8.3305248108],

[ 13.7725824117, 7.1308115721, 8.3305248108],

[ 7.4001153707, 9.337459445 , 8.3305248108],

[ 9.9483741522, 9.3377236128, 8.3305248108],

[ 9.9506295919, 4.9216035605, 8.3315242615],

[ 18.8701728582, 7.1298402548, 8.3315242615],

[ 6.1271384954, 7.1308115721, 8.3315242615],

[ 2.3052273988, 9.3372820616, 8.3315242615],

[ 20.1456416845, 9.3378123045, 8.3315242615],

[ 12.4977124929, 4.9221333265, 8.3325237122],

[ 15.0472024679, 4.923104167 , 8.3325237122],

[ 17.5956119299, 4.9234575033, 8.3325237122],

[ 1.0317283869, 11.5441082716, 8.3325237122],

[ 4.8536013365, 4.9226626158, 8.3335250702],

[ 4.8526204824, 9.3372820616, 8.3335250702],

[ 18.8703616857, 11.5448979139, 8.3335250702],

[ 16.3215926885, 11.5455187559, 8.3335250702],

[ 22.6925929784, 4.9235452414, 8.3345245209],

[ 3.5791333914, 7.1301053763, 8.3345245209],

[ 8.6743663549, 11.5436686277, 8.3345245209],

[ 11.2236922979, 11.5448979139, 8.3345245209],

[ 20.1432632208, 4.9233692885, 8.3355239716],

[ 3.5811084509, 11.5424288511, 8.3355239716],

[ 6.1270755529, 11.5431383848, 8.3355239716],

[ 13.7718518972, 11.5467585325, 8.3355239716],

[ 21.4163917303, 7.1290453673, 8.3365234222],

[ 16.3254722357, 8.6050871611, 10.3975204315],

[ 7.4034365415, 6.3877586126, 10.3985198822],

[ 18.8768924474, 8.6034106016, 10.3985198822],

[ 13.7747119665, 8.6052645445, 10.3985198822],

[ 9.9537853002, 6.3889945746, 10.3995193329],

[ 11.2250322103, 8.6035870314, 10.3995193329],

[ 8.6741193533, 8.6019095183, 10.4005206909],

[ 15.0479120016, 6.3922604323, 10.4025195923],

[ 12.5008720159, 6.3902305365, 10.4035209503],

[ 4.8547695875, 6.3913773298, 10.4055198517],

[ 17.5979522466, 6.3919075728, 10.4055198517],

[ 6.124993205 , 8.6024397612, 10.4055198517],

[ 8.6783117056, 4.1820815802, 10.4065193024],

[ 21.4235728979, 8.6018217802, 10.4065193024],

[ 17.5978416204, 10.8099688292, 10.4065193024],

[ 15.0470327139, 10.8105887175, 10.4065193024],

[ 6.1300524473, 4.1825236082, 10.4075206604],

[ 13.77498281 , 4.1855243445, 10.4075206604],

[ 9.9520400762, 10.808118701 , 10.4075206604],

[ 20.1480315923, 10.8086479902, 10.4075206604],

[ 16.3233932256, 4.1862305403, 10.4085201111],

[ 3.5769883394, 8.6006735563, 10.4085201111],

[ 2.3083823919, 10.8060883284, 10.4085201111],

[ 12.4992822408, 10.8076781035, 10.4085201111],

[ 11.226362586 , 4.1837595701, 10.4095195618],

[ 23.9682716131, 4.1861423254, 10.4105209198],

[ 21.4196132421, 4.1876434088, 10.4105209198],

[ 22.6926330328, 6.3927901983, 10.4115203705],

[ 7.401640296 , 10.8059080839, 10.4115203705],

[ 18.8695625066, 4.1894096136, 10.4155200806],

[ 20.1413730383, 6.3917301893, 10.4155200806],

[ 4.8580693006, 10.8042286635, 10.4165195312],

[ 17.6028426885, 7.8792494536, 12.4435199585],

[ 7.4003232717, 7.8543542624, 12.4455207672],

[ 15.0510619878, 7.8713043928, 12.4475196686],

[ 9.9517930746, 7.8621233702, 12.4485210266],

[ 12.5014823675, 7.8676842451, 12.4485210266],

[ 8.68472898 , 5.6544164419, 12.4695209351],

[ 16.3181327581, 10.0786579847, 12.4715198364],

[ 16.315292716 , 5.6593593359, 12.4725192871],

[ 4.850279212 , 7.8617705107, 12.4725192871],

[ 20.1516631841, 7.8707741499, 12.4725192871],

[ 6.1308635473, 5.6543272734, 12.4735206451],

[ 8.6862453222, 10.0728281736, 12.4745200958],

[ 18.8722518682, 10.0786579847, 12.4745200958],

[ 11.2296222448, 5.6594485045, 12.4775203552],

[ 13.7753823995, 5.6615666151, 12.4795192566],

[ 13.7727721929, 10.0747784376, 12.4795192566],

[ 11.2267020941, 10.0721281767, 12.4815200653],

[ 12.5062822103, 3.4577444792, 12.4845203247],

[ 7.4079812765, 3.4532414675, 12.4855197754],

[ 17.5894016027, 3.4532414675, 12.4865211334],

[ 22.6909126043, 3.4532414675, 12.4865211334],

[ 1.0334143638, 10.0746887922, 12.4865211334],

[ 3.581941247 , 5.6576822996, 12.4875205841],

[ 15.0485318899, 3.4532414675, 12.4895194855],

[ 20.1410716772, 3.4532414675, 12.4895194855],

[ 9.9574121237, 3.453594327 , 12.4895194855],

[ 4.855898261 , 3.4532414675, 12.4905208435],

[ 3.5851904154, 10.0723885298, 12.4915202942],

[ 21.4170516729, 5.6589182615, 12.4925197449],

[ 2.3069642782, 7.8663605452, 12.4925197449],

[ 18.8651832342, 5.6610373259, 12.5005210724],

[ 6.1369675398, 10.0718582869, 12.5005210724],

[ 19.5994724035, 8.3293017149, 15.2635196533],

[ 5.3906463384, 7.4332584143, 15.2665199127],

[ 7.266028285 , 5.6183093786, 15.3015197601],

[ 17.7235816717, 10.1437186003, 15.311519989 ],

[ 18.5279124975, 8.1502693892, 15.3155196991],

[ 6.4621514082, 7.6120256186, 15.3175205078],

[ 9.9774373769, 5.4150885344, 15.3295196381],

[ 17.8968318701, 6.3442362547, 15.3355201569],

[ 12.4450124502, 5.3792475462, 15.3395198669],

[ 7.4641383886, 6.6904705763, 15.3395198669],

[ 7.0937441587, 9.4175289869, 15.3415206757],

[ 15.0124725103, 10.3460587263, 15.3415206757],

[ 17.5255721807, 9.0713833571, 15.3455203857],

[ 14.9114221334, 5.3143614531, 15.3505195465],

[ 12.5454124212, 10.3817280531, 15.3515209045],

[ 9.9966491461, 6.5061415434, 15.3605197754],

[ 10.0795120001, 10.4467886686, 15.3625205841],

[ 12.467642188 , 6.4707411528, 15.3665202942],

[ 14.993522048 , 9.2549170256, 15.3675197449],

[ 12.5226320028, 9.2901400328, 15.3735202637],

[ 14.9397023916, 6.4045313597, 15.3805202332],

[ 11.2498019933, 7.1785701513, 15.386520752 ],

[ 8.8035310507, 7.2244762182, 15.386520752 ],

[ 10.0510219335, 9.3566149473, 15.386520752 ],

[ 16.1864818334, 8.5368469954, 15.3895210114],

[ 13.7406724691, 8.582311511 , 15.3895210114],

[ 13.7089723348, 7.1293982267, 15.3915199127],

[ 11.2813028097, 8.6314829588, 15.3945201721],

[ 16.1298621893, 7.0992072821, 15.4015201416],

[ 8.8606122732, 8.6620281935, 15.4035209503],

[ 12.5000003576, 7.4999998808, 18.4203265991],

[ 12.5000003576, 5.6926497221, 20.2276767578],

[ 10.6926501989, 7.4999998808, 20.2276767578],

[ 14.3073505163, 7.4999998808, 20.2276767578],

[ 12.5000003576, 9.3073500395, 20.2276767578],

[ 12.5000003576, 3.8852998018, 22.0350269165],

[ 10.6926501989, 5.6926497221, 22.0350269165],

[ 14.3073505163, 5.6926497221, 22.0350269165],

[ 12.5000003576, 7.4999998808, 22.0350269165],

[ 10.6926501989, 9.3073500395, 22.0350269165],

[ 14.3073505163, 9.3073500395, 22.0350269165],

[ 12.5000003576, 11.1147001982, 22.0350269165],

[ 10.6926501989, 3.8852998018, 23.8423770752],

[ 14.3073505163, 3.8852998018, 23.8423770752],

[ 12.5000003576, 5.6926497221, 23.8423770752],

[ 10.6926501989, 7.4999998808, 23.8423770752],

[ 14.3073505163, 7.4999998808, 23.8423770752],

[ 12.5000003576, 9.3073500395, 23.8423770752],

[ 10.6926501989, 11.1147001982, 23.8423770752],

[ 14.3073505163, 11.1147001982, 23.8423770752],

[ 12.5000003576, 3.8852998018, 25.6497272339],

[ 10.6926501989, 5.6926497221, 25.6497272339],

[ 14.3073505163, 5.6926497221, 25.6497272339],

[ 12.5000003576, 7.4999998808, 25.6497272339],

[ 10.6926501989, 9.3073500395, 25.6497272339],

[ 14.3073505163, 9.3073500395, 25.6497272339],

[ 12.5000003576, 11.1147001982, 25.6497272339],

[ 10.6926501989, 3.8852998018, 27.4570773926],

[ 14.3073505163, 3.8852998018, 27.4570773926],

[ 12.5000003576, 5.6926497221, 27.4570773926],

[ 10.6926501989, 7.4999998808, 27.4570773926],

[ 14.3073505163, 7.4999998808, 27.4570773926],

[ 12.5000003576, 9.3073500395, 27.4570773926],

[ 10.6926501989, 11.1147001982, 27.4570773926],

[ 14.3073505163, 11.1147001982, 27.4570773926],

[ 12.5000003576, 3.8852998018, 29.2644275513],

[ 10.6926501989, 5.6926497221, 29.2644275513],

[ 14.3073505163, 5.6926497221, 29.2644275513],

[ 12.5000003576, 7.4999998808, 29.2644275513],

[ 10.6926501989, 9.3073500395, 29.2644275513],

[ 14.3073505163, 9.3073500395, 29.2644275513],

[ 12.5000003576, 11.1147001982, 29.2644275513]]*Angstrom

# Set up configuration

central_region = BulkConfiguration(

bravais_lattice=central_region_lattice,

elements=central_region_elements,

cartesian_coordinates=central_region_coordinates

)

device_configuration = DeviceConfiguration(

central_region,

[left_electrode, right_electrode],

equivalent_electrode_lengths=[7.22940064, 7.229393005399999]*Angstrom,

)

# -------------------------------------------------------------

# Calculator

# -------------------------------------------------------------

#----------------------------------------

# Basis Set

#----------------------------------------

basis_set = [

GGABasis.Hydrogen_DoubleZetaPolarized,

GGABasis.Carbon_DoubleZetaPolarized,

GGABasis.Copper_DoubleZetaPolarized,

GGABasis.Selenium_DoubleZetaPolarized,

]

#----------------------------------------

# Numerical Accuracy Settings

#----------------------------------------

left_electrode_k_point_sampling = MonkhorstPackGrid(

nc=261,

)

left_electrode_numerical_accuracy_parameters = NumericalAccuracyParameters(

k_point_sampling=left_electrode_k_point_sampling,

density_mesh_cutoff=100.0*Hartree,

)

right_electrode_k_point_sampling = MonkhorstPackGrid(

nc=261,

)

right_electrode_numerical_accuracy_parameters = NumericalAccuracyParameters(

k_point_sampling=right_electrode_k_point_sampling,

density_mesh_cutoff=100.0*Hartree,

)

device_k_point_sampling = MonkhorstPackGrid(

nc=261,

)

device_numerical_accuracy_parameters = NumericalAccuracyParameters(

k_point_sampling=device_k_point_sampling,

density_mesh_cutoff=100.0*Hartree,

)

#----------------------------------------

# Poisson Solver Settings

#----------------------------------------

left_electrode_poisson_solver = FastFourier2DSolver(

boundary_conditions=[[PeriodicBoundaryCondition(),PeriodicBoundaryCondition()],

[PeriodicBoundaryCondition(),PeriodicBoundaryCondition()],

[PeriodicBoundaryCondition(),PeriodicBoundaryCondition()]]

)

right_electrode_poisson_solver = FastFourier2DSolver(

boundary_conditions=[[PeriodicBoundaryCondition(),PeriodicBoundaryCondition()],

[PeriodicBoundaryCondition(),PeriodicBoundaryCondition()],

[PeriodicBoundaryCondition(),PeriodicBoundaryCondition()]]

)

#----------------------------------------

# Contour Integral Settings

#----------------------------------------

equilibrium_contour = SemiCircleContour(

integral_lower_bound=1.84481605655*Hartree,

circle_points=30,

)

contour_parameters = ContourParameters(

equilibrium_contour=equilibrium_contour,

)

#----------------------------------------

# Electrode Calculators

#----------------------------------------

left_electrode_calculator = LCAOCalculator(

basis_set=basis_set,

numerical_accuracy_parameters=left_electrode_numerical_accuracy_parameters,

poisson_solver=left_electrode_poisson_solver,

)

right_electrode_calculator = LCAOCalculator(

basis_set=basis_set,

numerical_accuracy_parameters=right_electrode_numerical_accuracy_parameters,

poisson_solver=right_electrode_poisson_solver,

)

#----------------------------------------

# Device Calculator

#----------------------------------------

calculator = DeviceLCAOCalculator(

basis_set=basis_set,

numerical_accuracy_parameters=device_numerical_accuracy_parameters,

contour_parameters=contour_parameters,

electrode_calculators=

[left_electrode_calculator, right_electrode_calculator],

)

device_configuration.setCalculator(calculator)

nlprint(device_configuration)

nlsave('phy-Cu-ADS-Cu.hdf5', device_configuration)

# -------------------------------------------------------------

# IV Characteristics

# -------------------------------------------------------------

# Kpoint sampling

kpoint_grid = MonkhorstPackGrid(

na=2,

)

# Gate-source voltages

gate_source_voltages = numpy.linspace(0, 0, 1)*Volt

# Drain-source voltages

drain_source_voltages = numpy.linspace(-0.12, 0.2, 9)*Volt

# File name.

filename = u'phy-Cu-ADS-Cu.hdf5'

iv_characteristics = IVCharacteristics(

configuration=device_configuration,

filename=filename,

object_id='ivcharacteristics',

gate_regions=[],

gate_source_voltages=gate_source_voltages,

drain_source_voltages=drain_source_voltages,

energies=None,

kpoints=kpoint_grid,

self_energy_calculator=RecursionSelfEnergy(),

energy_zero_parameter=AverageFermiLevel,

infinitesimal=1e-06*eV,

log_filename_prefix='ivcharacteristics_',

number_of_processes_per_task=None,

)

iv_characteristics.update()

**chem-Cu-ADS-Cu-*c*.py**

# -*- coding: utf-8 -*-

# -------------------------------------------------------------

# Two-probe Configuration

# -------------------------------------------------------------

# -------------------------------------------------------------

# Left Electrode

# -------------------------------------------------------------

# Set up lattice

vector_a = [25.0, 0.0, 0.0]*Angstrom

vector_b = [0.0, 15.0, 0.0]*Angstrom

vector_c = [0.0, 0.0, 3.61470032]*Angstrom

left_electrode_lattice = UnitCell(vector_a, vector_b, vector_c)

# Define elements

left_electrode_elements = [Copper, Copper, Copper, Copper, Copper, Copper, Copper, Copper,

Copper, Copper, Copper, Copper, Copper, Copper, Copper]

# Define coordinates

left_electrode_coordinates = [[ 10.6926496004 , 3.88530015845, 0.9035754 ],

[ 14.3073499204 , 3.88530015845, 0.9035754 ],

[ 12.4999997604 , 5.69265007845, 0.9035754 ],

[ 10.6926496004 , 7.50000023845, 0.9035754 ],

[ 14.3073499204 , 7.50000023845, 0.9035754 ],

[ 12.4999997604 , 9.30735039845, 0.9035754 ],

[ 10.6926496004 , 11.11470055845, 0.9035754 ],

[ 14.3073499204 , 11.11470055845, 0.9035754 ],

[ 12.4999997604 , 3.88530015845, 2.71092556 ],

[ 10.6926496004 , 5.69265007845, 2.71092556 ],

[ 14.3073499204 , 5.69265007845, 2.71092556 ],

[ 12.4999997604 , 7.50000023845, 2.71092556 ],

[ 10.6926496004 , 9.30735039845, 2.71092556 ],

[ 14.3073499204 , 9.30735039845, 2.71092556 ],

[ 12.4999997604 , 11.11470055845, 2.71092556 ]]*Angstrom

# Set up configuration

left_electrode = BulkConfiguration(

bravais_lattice=left_electrode_lattice,

elements=left_electrode_elements,

cartesian_coordinates=left_electrode_coordinates

)

# -------------------------------------------------------------

# Right Electrode

# -------------------------------------------------------------

# Set up lattice

vector_a = [25.0, 0.0, 0.0]*Angstrom

vector_b = [0.0, 15.0, 0.0]*Angstrom

vector_c = [0.0, 0.0, 3.6146965027]*Angstrom

right_electrode_lattice = UnitCell(vector_a, vector_b, vector_c)

# Define elements

right_electrode_elements = [Copper, Copper, Copper, Copper, Copper, Copper, Copper, Copper,

Copper, Copper, Copper, Copper, Copper, Copper, Copper]

# Define coordinates

right_electrode_coordinates = [[ 10.6926497817 , 3.88530015945, 0.9037766693 ],

[ 14.3073500991 , 3.88530015945, 0.9037766693 ],

[ 12.4999999404 , 5.69265007975, 0.9037766693 ],

[ 10.6926497817 , 7.50000023845, 0.9037766693 ],

[ 14.3073500991 , 7.50000023845, 0.9037766693 ],

[ 12.4999999404 , 9.30735039715, 0.9037766693 ],

[ 10.6926497817 , 11.11470055585, 0.9037766693 ],

[ 14.3073500991 , 11.11470055585, 0.9037766693 ],

[ 12.4999999404 , 3.88530015945, 2.711126828 ],

[ 10.6926497817 , 5.69265007975, 2.711126828 ],

[ 14.3073500991 , 5.69265007975, 2.711126828 ],

[ 12.4999999404 , 7.50000023845, 2.711126828 ],

[ 10.6926497817 , 9.30735039715, 2.711126828 ],

[ 14.3073500991 , 9.30735039715, 2.711126828 ],

[ 12.4999999404 , 11.11470055585, 2.711126828 ]]*Angstrom

# Set up configuration

right_electrode = BulkConfiguration(

bravais_lattice=right_electrode_lattice,

elements=right_electrode_elements,

cartesian_coordinates=right_electrode_coordinates

)

# -------------------------------------------------------------

# Central Region

# -------------------------------------------------------------

# Set up lattice

vector_a = [25.0, 0.0, 0.0]*Angstrom

vector_b = [0.0, 15.0, 0.0]*Angstrom

vector_c = [0.0, 0.0, 30.167997226]*Angstrom

central_region_lattice = UnitCell(vector_a, vector_b, vector_c)

# Define elements

central_region_elements = [Copper, Copper, Copper, Copper, Copper, Copper, Copper, Copper,

Copper, Copper, Copper, Copper, Copper, Copper, Copper, Copper,

Copper, Copper, Copper, Copper, Copper, Copper, Copper, Copper,

Copper, Copper, Copper, Copper, Copper, Copper, Copper, Copper,

Copper, Copper, Copper, Copper, Copper, Copper, Copper, Copper,

Copper, Copper, Copper, Copper, Copper, Copper, Copper, Copper,

Copper, Copper, Copper, Copper, Copper, Copper, Copper, Copper,

Copper, Copper, Copper, Copper, Copper, Copper, Copper, Copper,

Copper, Copper, Copper, Copper, Copper, Copper, Copper, Copper,

Copper, Copper, Copper, Copper, Copper, Copper, Copper, Copper,

Copper, Copper, Copper, Copper, Copper, Copper, Copper, Copper,

Copper, Copper, Copper, Copper, Copper, Copper, Copper, Copper,

Copper, Copper, Copper, Copper, Copper, Copper, Copper, Copper,

Copper, Copper, Copper, Copper, Copper, Copper, Copper, Copper,

Copper, Copper, Copper, Copper, Copper, Copper, Copper, Copper,

Copper, Copper, Copper, Copper, Copper, Copper, Carbon, Carbon,

Carbon, Carbon, Carbon, Carbon, Carbon, Hydrogen, Carbon, Hydrogen,

Carbon, Hydrogen, Hydrogen, Carbon, Hydrogen, Carbon, Hydrogen,

Carbon, Selenium, Selenium, Carbon, Carbon, Carbon, Carbon, Carbon,

Carbon, Hydrogen, Hydrogen, Hydrogen, Hydrogen, Copper, Copper,

Copper, Copper, Copper, Copper, Copper, Copper, Copper, Copper,

Copper, Copper, Copper, Copper, Copper, Copper, Copper, Copper,

Copper, Copper, Copper, Copper, Copper, Copper, Copper, Copper,

Copper, Copper, Copper, Copper, Copper, Copper, Copper, Copper,

Copper, Copper, Copper, Copper, Copper, Copper, Copper, Copper]

# Define coordinates

central_region_coordinates = [[ 10.6926496004 , 3.88530015845, 0.9035754 ],

[ 14.3073499204 , 3.88530015845, 0.9035754 ],

[ 12.4999997604 , 5.69265007845, 0.9035754 ],

[ 10.6926496004 , 7.50000023845, 0.9035754 ],

[ 14.3073499204 , 7.50000023845, 0.9035754 ],

[ 12.4999997604 , 9.30735039845, 0.9035754 ],

[ 10.6926496004 , 11.11470055845, 0.9035754 ],

[ 14.3073499204 , 11.11470055845, 0.9035754 ],

[ 12.4999997604 , 3.88530015845, 2.71092556 ],

[ 10.6926496004 , 5.69265007845, 2.71092556 ],

[ 14.3073499204 , 5.69265007845, 2.71092556 ],

[ 12.4999997604 , 7.50000023845, 2.71092556 ],

[ 10.6926496004 , 9.30735039845, 2.71092556 ],

[ 14.3073499204 , 9.30735039845, 2.71092556 ],

[ 12.4999997604 , 11.11470055845, 2.71092556 ],

[ 10.6926496004 , 3.88530015845, 4.51827571 ],

[ 14.3073499204 , 3.88530015845, 4.51827571 ],

[ 12.4999997604 , 5.69265007845, 4.51827571 ],

[ 10.6926496004 , 7.50000023845, 4.51827571 ],

[ 14.3073499204 , 7.50000023845, 4.51827571 ],

[ 12.4999997604 , 9.30735039845, 4.51827571 ],

[ 10.6926496004 , 11.11470055845, 4.51827571 ],

[ 14.3073499204 , 11.11470055845, 4.51827571 ],

[ 12.4999997604 , 3.88530015845, 6.32562587 ],

[ 10.6926496004 , 5.69265007845, 6.32562587 ],

[ 14.3073499204 , 5.69265007845, 6.32562587 ],

[ 12.4999997604 , 7.50000023845, 6.32562587 ],

[ 10.6926496004 , 9.30735039845, 6.32562587 ],

[ 14.3073499204 , 9.30735039845, 6.32562587 ],

[ 12.4999997604 , 11.11470055845, 6.32562587 ],

[ 3.5799309611 , 11.55716919905, 8.3275264587 ],

[ 15.0424889922 , 9.34946560865, 8.3295253601 ],

[ 8.6729840636 , 11.56228852275, 8.3295253601 ],

[ 11.2219085097 , 11.56317830085, 8.3295253601 ],

[ 12.4971389175 , 9.34840607645, 8.3305267181 ],

[ 6.1268658042 , 11.56008839615, 8.3305267181 ],

[ 7.4030150771 , 9.34725880625, 8.3315261688 ],

[ 2.3047119975 , 9.34911274915, 8.3315261688 ],

[ 18.8709697127 , 11.55831837655, 8.3315261688 ],

[ 13.7716493011 , 11.56228852275, 8.3315261688 ],

[ 9.9510316253 , 4.93961262705, 8.3325256195 ],

[ 4.8561820388 , 9.34734654425, 8.3325256195 ],

[ 17.592489183 , 9.34955334665, 8.3325256195 ],

[ 20.1437987685 , 9.35052514075, 8.3325256195 ],

[ 16.3206691146 , 11.55911850935, 8.3325256195 ],

[ 1.0331498981 , 11.55964875225, 8.3325256195 ],

[ 9.9480122924 , 9.34611058235, 8.3335269775 ],

[ 22.6923789382 , 4.93696475035, 8.3345264282 ],

[ 4.8549208045 , 4.93731760985, 8.3345264282 ],

[ 7.4022120833 , 4.93996596335, 8.3345264282 ],

[ 3.5815238357 , 7.14255261425, 8.3345264282 ],

[ 20.1435584426 , 4.93908381465, 8.3355258789 ],

[ 17.5950984359 , 4.94058394435, 8.3355258789 ],

[ 6.1295790076 , 7.14211153985, 8.3355258789 ],

[ 18.8674086928 , 7.14202284815, 8.3365253296 ],

[ 12.4989890456 , 4.94323277475, 8.3375266876 ],

[ 15.0471991897 , 4.94393897055, 8.3375266876 ],

[ 21.4148597121 , 7.14193463325, 8.3375266876 ],

[ 8.6792153716 , 7.14105153085, 8.339525589 ],

[ 11.2287492156 , 7.14193463325, 8.339525589 ],

[ 16.3195590377 , 7.14069867135, 8.3435252991 ],

[ 13.7724189162 , 7.14131665235, 8.3445266571 ],

[ 9.9445418716 , 10.81861901285, 10.3835281219 ],

[ 12.4942788482 , 10.82444882395, 10.3865283813 ],

[ 7.3989838958 , 10.81438851355, 10.3915275421 ],

[ 8.6754521728 , 4.19232296945, 10.3925289001 ],

[ 15.0467690826 , 10.82656884195, 10.3935283508 ],

[ 4.85342592 , 10.81367897995, 10.3955272522 ],

[ 18.8749980331 , 8.61868405345, 10.4005283203 ],

[ 17.6007880569 , 10.82532906535, 10.4005283203 ],

[ 2.3080720305 , 10.81685853005, 10.401527771 ],

[ 11.2252387404 , 4.20123887065, 10.4035285797 ],

[ 16.3124694228 , 8.61912465095, 10.4035285797 ],

[ 20.1508292556 , 10.82391858105, 10.4035285797 ],

[ 3.5782069564 , 8.61162114145, 10.4045280304 ],

[ 13.7743186355 , 4.20750689505, 10.4065288391 ],

[ 22.6971186996 , 6.40797495845, 10.4075282898 ],

[ 6.1288227439 , 4.20088553435, 10.4085277405 ],

[ 23.9680690169 , 4.20097374915, 10.4085277405 ],

[ 16.3220691085 , 4.20865464215, 10.4085277405 ],

[ 21.4198493362 , 8.61426949505, 10.4085277405 ],

[ 21.420368135 , 4.20397591595, 10.4095290985 ],

[ 4.8575667739 , 6.40488457685, 10.4125274506 ],

[ 6.1290659308 , 8.60738396645, 10.4125274506 ],

[ 11.2245187163 , 8.61117959025, 10.4125274506 ],

[ 13.7693585753 , 8.61524033545, 10.4135288086 ],

[ 18.8718585372 , 4.20768380165, 10.4145282593 ],

[ 8.6706475616 , 8.60508751875, 10.4185279694 ],

[ 9.9620370269 , 6.40717959405, 10.4205287781 ],

[ 7.4011368156 , 6.41044688225, 10.4205287781 ],

[ 20.141158998 , 6.40656256675, 10.4235290375 ],

[ 17.5994796157 , 6.40444350245, 10.4285281982 ],

[ 15.0432690978 , 6.41159367565, 10.4465278473 ],

[ 12.5025491118 , 6.41097664835, 10.448528656 ],

[ 8.6872720122 , 5.64647078515, 12.4315284576 ],

[ 17.5970286727 , 7.91191363335, 12.434528717 ],

[ 12.503269136 , 3.43682169915, 12.4465278473 ],

[ 13.7715491653 , 10.12773919105, 12.447527298 ],

[ 15.0574387908 , 3.44732785225, 12.448528656 ],

[ 11.2188491225 , 10.11361908915, 12.4495281067 ],

[ 9.947875917 , 3.44538474085, 12.4565280762 ],

[ 16.3248996139 , 10.11529850965, 12.4595283356 ],

[ 8.6783398986 , 10.09710907935, 12.4635280457 ],

[ 17.5960196853 , 3.46613073355, 12.4665283051 ],

[ 7.4027771354 , 3.45624375345, 12.4695285645 ],

[ 18.8733691573 , 10.10107827185, 12.4715274658 ],

[ 6.1242699027 , 10.09066891675, 12.4725288239 ],

[ 4.8411001563 , 7.87766051295, 12.4795287933 ],

[ 9.9422063232 , 7.89178586005, 12.4795287933 ],

[ 20.1558493972 , 3.46966171265, 12.480528244 ],

[ 20.1448783279 , 7.89063763625, 12.4815276947 ],

[ 3.5783550143 , 10.08351826675, 12.4835285034 ],

[ 21.4328498244 , 5.67675185205, 12.4845279541 ],

[ 1.0319309831 , 10.08924889565, 12.4845279541 ],

[ 4.8559951186 , 3.46613073355, 12.4865287628 ],

[ 2.3037478328 , 7.88110375405, 12.4875282135 ],

[ 3.5876440406 , 5.67321991925, 12.4885276642 ],

[ 22.6995696425 , 3.47213363655, 12.4895290222 ],

[ 6.1311640143 , 5.66333270075, 12.4895290222 ],

[ 11.2323693633 , 5.64161562925, 12.4905284729 ],

[ 15.0495786071 , 7.92506670955, 12.4905284729 ],

[ 16.3312396407 , 5.66633391385, 12.4955276337 ],

[ 12.4942387939 , 7.92612671855, 12.4975284424 ],

[ 7.3850778937 , 7.88640093805, 12.5115283813 ],

[ 13.782109201 , 5.64143872265, 12.5155280914 ],

[ 18.8853091598 , 5.66854071625, 12.5215286102 ],

[ 12.9113587737 , 8.13729310035, 14.6945289459 ],

[ 13.0834893584 , 5.30659270285, 14.7055286255 ],

[ 14.2906188369 , 6.06438851355, 14.7895282593 ],

[ 14.2116689086 , 7.51756691935, 14.8045276489 ],

[ 11.7043790221 , 7.37817263605, 14.8075279083 ],

[ 11.7805384994 , 5.92631888395, 14.8165286865 ],

[ 15.5819491744 , 5.43795371055, 14.8685287323 ],

[ 13.1451587081 , 4.23010659225, 14.8795284119 ],

[ 10.417589128 , 8.00381302835, 14.8825286713 ],

[ 12.8526391387 , 9.21148419385, 14.8825286713 ],

[ 15.3983086944 , 8.28154206275, 14.9235290375 ],

[ 15.6352185607 , 4.35131478315, 14.9445289459 ],

[ 10.3650893569 , 9.09159970285, 14.948528656 ],

[ 10.596439302 , 5.16322684295, 14.9615272369 ],

[ 15.3206786513 , 9.36659169205, 15.012527832 ],

[ 16.7231788039 , 6.23574090005, 15.0285285797 ],

[ 10.6747292876 , 4.07702851295, 15.0385288086 ],

[ 9.2784489989 , 7.20770382885, 15.0655273285 ],

[ 18.5574797988 , 5.63216996195, 15.0765289154 ],

[ 7.4520000815 , 7.82098460205, 15.0765289154 ],

[ 16.6632880569 , 7.65307688715, 15.0855277863 ],

[ 9.33115381 , 5.79116177565, 15.1165279236 ],

[ 17.938159883 , 8.30096364025, 15.2335285034 ],

[ 8.0496606231 , 5.14910197265, 15.2535289612 ],

[ 6.9623531699 , 5.97760987285, 15.2735275116 ],

[ 19.0282687545 , 7.47607493405, 15.2755283203 ],

[ 18.033359468 , 9.38680768015, 15.2845290985 ],

[ 7.9491547942 , 4.06396365165, 15.3125289764 ],

[ 20.0781096816 , 7.74285674095, 15.3655284729 ],

[ 5.9118980765 , 5.71859574325, 15.3735278931 ],

[ 12.4999999404 , 7.50000023845, 18.4203265991 ],

[ 12.4999999404 , 5.69265007975, 20.2276767578 ],

[ 10.6926497817 , 7.50000023845, 20.2276767578 ],

[ 14.3073500991 , 7.50000023845, 20.2276767578 ],

[ 12.4999999404 , 9.30735039715, 20.2276767578 ],

[ 12.4999999404 , 3.88530015945, 22.0350269165 ],

[ 10.6926497817 , 5.69265007975, 22.0350269165 ],

[ 14.3073500991 , 5.69265007975, 22.0350269165 ],

[ 12.4999999404 , 7.50000023845, 22.0350269165 ],

[ 10.6926497817 , 9.30735039715, 22.0350269165 ],

[ 14.3073500991 , 9.30735039715, 22.0350269165 ],

[ 12.4999999404 , 11.11470055585, 22.0350269165 ],

[ 10.6926497817 , 3.88530015945, 23.8423770752 ],

[ 14.3073500991 , 3.88530015945, 23.8423770752 ],

[ 12.4999999404 , 5.69265007975, 23.8423770752 ],

[ 10.6926497817 , 7.50000023845, 23.8423770752 ],

[ 14.3073500991 , 7.50000023845, 23.8423770752 ],

[ 12.4999999404 , 9.30735039715, 23.8423770752 ],

[ 10.6926497817 , 11.11470055585, 23.8423770752 ],

[ 14.3073500991 , 11.11470055585, 23.8423770752 ],

[ 12.4999999404 , 3.88530015945, 25.6497272339 ],

[ 10.6926497817 , 5.69265007975, 25.6497272339 ],

[ 14.3073500991 , 5.69265007975, 25.6497272339 ],

[ 12.4999999404 , 7.50000023845, 25.6497272339 ],

[ 10.6926497817 , 9.30735039715, 25.6497272339 ],

[ 14.3073500991 , 9.30735039715, 25.6497272339 ],

[ 12.4999999404 , 11.11470055585, 25.6497272339 ],

[ 10.6926497817 , 3.88530015945, 27.4570773926 ],

[ 14.3073500991 , 3.88530015945, 27.4570773926 ],

[ 12.4999999404 , 5.69265007975, 27.4570773926 ],

[ 10.6926497817 , 7.50000023845, 27.4570773926 ],

[ 14.3073500991 , 7.50000023845, 27.4570773926 ],

[ 12.4999999404 , 9.30735039715, 27.4570773926 ],

[ 10.6926497817 , 11.11470055585, 27.4570773926 ],

[ 14.3073500991 , 11.11470055585, 27.4570773926 ],

[ 12.4999999404 , 3.88530015945, 29.2644275513 ],

[ 10.6926497817 , 5.69265007975, 29.2644275513 ],

[ 14.3073500991 , 5.69265007975, 29.2644275513 ],

[ 12.4999999404 , 7.50000023845, 29.2644275513 ],

[ 10.6926497817 , 9.30735039715, 29.2644275513 ],

[ 14.3073500991 , 9.30735039715, 29.2644275513 ],

[ 12.4999999404 , 11.11470055585, 29.2644275513 ]]*Angstrom

# Set up configuration

central_region = BulkConfiguration(

bravais_lattice=central_region_lattice,

elements=central_region_elements,

cartesian_coordinates=central_region_coordinates

)

device_configuration = DeviceConfiguration(

central_region,

[left_electrode, right_electrode],

equivalent_electrode_lengths=[7.22940064, 7.229393005399999]*Angstrom,

)

# -------------------------------------------------------------

# Calculator

# -------------------------------------------------------------

#----------------------------------------

# Basis Set

#----------------------------------------

basis_set = [

GGABasis.Hydrogen_DoubleZetaPolarized,

GGABasis.Carbon_DoubleZetaPolarized,

GGABasis.Copper_DoubleZetaPolarized,

GGABasis.Selenium_DoubleZetaPolarized,

]

#----------------------------------------

# Numerical Accuracy Settings

#----------------------------------------

left_electrode_k_point_sampling = MonkhorstPackGrid(

nc=261,

)

left_electrode_numerical_accuracy_parameters = NumericalAccuracyParameters(

k_point_sampling=left_electrode_k_point_sampling,

density_mesh_cutoff=100.0*Hartree,

)

right_electrode_k_point_sampling = MonkhorstPackGrid(

nc=261,

)

right_electrode_numerical_accuracy_parameters = NumericalAccuracyParameters(

k_point_sampling=right_electrode_k_point_sampling,

density_mesh_cutoff=100.0*Hartree,

)

device_k_point_sampling = MonkhorstPackGrid(

nc=261,

)

device_numerical_accuracy_parameters = NumericalAccuracyParameters(

k_point_sampling=device_k_point_sampling,

density_mesh_cutoff=100.0*Hartree,

)

#----------------------------------------

# Poisson Solver Settings

#----------------------------------------

left_electrode_poisson_solver = FastFourier2DSolver(

boundary_conditions=[[PeriodicBoundaryCondition(),PeriodicBoundaryCondition()],

[PeriodicBoundaryCondition(),PeriodicBoundaryCondition()],

[PeriodicBoundaryCondition(),PeriodicBoundaryCondition()]]

)

right_electrode_poisson_solver = FastFourier2DSolver(

boundary_conditions=[[PeriodicBoundaryCondition(),PeriodicBoundaryCondition()],

[PeriodicBoundaryCondition(),PeriodicBoundaryCondition()],

[PeriodicBoundaryCondition(),PeriodicBoundaryCondition()]]

)

#----------------------------------------

# Contour Integral Settings

#----------------------------------------

equilibrium_contour = SemiCircleContour(

integral_lower_bound=1.84481605655*Hartree,

circle_points=30,

)

contour_parameters = ContourParameters(

equilibrium_contour=equilibrium_contour,

)

#----------------------------------------

# Electrode Calculators

#----------------------------------------

left_electrode_calculator = LCAOCalculator(

basis_set=basis_set,

numerical_accuracy_parameters=left_electrode_numerical_accuracy_parameters,

poisson_solver=left_electrode_poisson_solver,

)

right_electrode_calculator = LCAOCalculator(

basis_set=basis_set,

numerical_accuracy_parameters=right_electrode_numerical_accuracy_parameters,

poisson_solver=right_electrode_poisson_solver,

)

#----------------------------------------

# Device Calculator

#----------------------------------------

calculator = DeviceLCAOCalculator(

basis_set=basis_set,

numerical_accuracy_parameters=device_numerical_accuracy_parameters,

contour_parameters=contour_parameters,

electrode_calculators=

[left_electrode_calculator, right_electrode_calculator],

)

device_configuration.setCalculator(calculator)

nlprint(device_configuration)

nlsave('Device chem-Cu-ADS-Cu.hdf5', device_configuration)

# -------------------------------------------------------------

# IV Characteristics

# -------------------------------------------------------------

# Kpoint sampling

kpoint_grid = MonkhorstPackGrid(

na=2,

)

# Gate-source voltages

gate_source_voltages = numpy.linspace(0, 0, 1)*Volt

# Drain-source voltages

drain_source_voltages = numpy.linspace(-0.12, 0.2, 9)*Volt

# File name.

filename = u'Device chem-Cu-ADS-Cu.hdf5'

iv_characteristics = IVCharacteristics(

configuration=device_configuration,

filename=filename,

object_id='ivcharacteristics',

gate_regions=[],

gate_source_voltages=gate_source_voltages,

drain_source_voltages=drain_source_voltages,

energies=None,

kpoints=kpoint_grid,

self_energy_calculator=RecursionSelfEnergy(),

energy_zero_parameter=AverageFermiLevel,

infinitesimal=1e-06*eV,

log_filename_prefix='ivcharacteristics_',

number_of_processes_per_task=None,

)

iv_characteristics.update()

**phys-Cu-ADS-Cu-*c*0.py**

# -*- coding: utf-8 -*-

# -------------------------------------------------------------

# Two-probe Configuration

# -------------------------------------------------------------

# -------------------------------------------------------------

# Left Electrode

# -------------------------------------------------------------

# Set up lattice

vector_a = [25.0, 0.0, 0.0]*Angstrom

vector_b = [0.0, 15.0, 0.0]*Angstrom

vector_c = [0.0, 0.0, 3.61470032]*Angstrom

left_electrode_lattice = UnitCell(vector_a, vector_b, vector_c)

# Define elements

left_electrode_elements = [Copper, Copper, Copper, Copper, Copper, Copper, Copper, Copper,

Copper, Copper, Copper, Copper, Copper, Copper, Copper]

# Define coordinates

left_electrode_coordinates = [[ 10.6926501976, 3.8852998008, 0.9035754 ],

[ 14.3073505176, 3.8852998008, 0.9035754 ],

[ 12.5000003576, 5.6926497208, 0.9035754 ],

[ 10.6926501976, 7.4999998808, 0.9035754 ],

[ 14.3073505176, 7.4999998808, 0.9035754 ],

[ 12.5000003576, 9.3073500408, 0.9035754 ],

[ 10.6926501976, 11.1147002008, 0.9035754 ],

[ 14.3073505176, 11.1147002008, 0.9035754 ],

[ 12.5000003576, 3.8852998008, 2.71092556 ],

[ 10.6926501976, 5.6926497208, 2.71092556 ],

[ 14.3073505176, 5.6926497208, 2.71092556 ],

[ 12.5000003576, 7.4999998808, 2.71092556 ],

[ 10.6926501976, 9.3073500408, 2.71092556 ],

[ 14.3073505176, 9.3073500408, 2.71092556 ],

[ 12.5000003576, 11.1147002008, 2.71092556 ]]*Angstrom

# Set up configuration

left_electrode = BulkConfiguration(

bravais_lattice=left_electrode_lattice,

elements=left_electrode_elements,

cartesian_coordinates=left_electrode_coordinates

)

# -------------------------------------------------------------

# Right Electrode

# -------------------------------------------------------------

# Set up lattice

vector_a = [25.0, 0.0, 0.0]*Angstrom

vector_b = [0.0, 15.0, 0.0]*Angstrom

vector_c = [0.0, 0.0, 3.6146965027]*Angstrom

right_electrode_lattice = UnitCell(vector_a, vector_b, vector_c)

# Define elements

right_electrode_elements = [Copper, Copper, Copper, Copper, Copper, Copper, Copper, Copper,

Copper, Copper, Copper, Copper, Copper, Copper, Copper]

# Define coordinates

right_electrode_coordinates = [[ 10.6941498413 , 4.252979881267, 0.9037728546 ],

[ 14.3088501587 , 4.252979881267, 0.9037728546 ],

[ 12.5015 , 6.060329801567, 0.9037728546 ],

[ 10.6941498413 , 7.867679960267, 0.9037728546 ],

[ 14.3088501587 , 7.867679960267, 0.9037728546 ],

[ 12.5015 , 9.675030118967, 0.9037728546 ],

[ 10.6941498413 , 11.482380277667, 0.9037728546 ],

[ 14.3088501587 , 11.482380277667, 0.9037728546 ],

[ 12.5015 , 4.252979881267, 2.7111230133 ],

[ 10.6941498413 , 6.060329801567, 2.7111230133 ],

[ 14.3088501587 , 6.060329801567, 2.7111230133 ],

[ 12.5015 , 7.867679960267, 2.7111230133 ],

[ 10.6941498413 , 9.675030118967, 2.7111230133 ],

[ 14.3088501587 , 9.675030118967, 2.7111230133 ],

[ 12.5015 , 11.482380277667, 2.7111230133 ]]*Angstrom

# Set up configuration

right_electrode = BulkConfiguration(

bravais_lattice=right_electrode_lattice,

elements=right_electrode_elements,

cartesian_coordinates=right_electrode_coordinates

)

# -------------------------------------------------------------

# Central Region

# -------------------------------------------------------------

# Set up lattice

vector_a = [25.0, 0.0, 0.0]*Angstrom

vector_b = [0.0, 15.0, 0.0]*Angstrom

vector_c = [0.0, 0.0, 30.167997226]*Angstrom

central_region_lattice = UnitCell(vector_a, vector_b, vector_c)

# Define elements

central_region_elements = [Copper, Copper, Copper, Copper, Copper, Copper, Copper, Copper,

Copper, Copper, Copper, Copper, Copper, Copper, Copper, Copper,

Copper, Copper, Copper, Copper, Copper, Copper, Copper, Copper,

Copper, Copper, Copper, Copper, Copper, Copper, Copper, Copper,

Copper, Copper, Copper, Copper, Copper, Copper, Copper, Copper,

Copper, Copper, Copper, Copper, Copper, Copper, Copper, Copper,

Copper, Copper, Copper, Copper, Copper, Copper, Copper, Copper,

Copper, Copper, Copper, Copper, Copper, Copper, Copper, Copper,

Copper, Copper, Copper, Copper, Copper, Copper, Copper, Copper,

Copper, Copper, Copper, Copper, Copper, Copper, Copper, Copper,

Copper, Copper, Copper, Copper, Copper, Copper, Copper, Copper,

Copper, Copper, Copper, Copper, Copper, Copper, Copper, Copper,

Copper, Copper, Copper, Copper, Copper, Copper, Copper, Copper,

Copper, Copper, Copper, Copper, Copper, Copper, Copper, Copper,

Copper, Copper, Copper, Copper, Copper, Copper, Copper, Copper,

Copper, Copper, Copper, Copper, Copper, Copper, Hydrogen, Hydrogen,

Hydrogen, Hydrogen, Carbon, Carbon, Hydrogen, Selenium, Hydrogen,

Carbon, Selenium, Hydrogen, Carbon, Hydrogen, Hydrogen, Carbon,

Hydrogen, Carbon, Carbon, Carbon, Carbon, Carbon, Carbon, Carbon,

Carbon, Carbon, Carbon, Carbon, Carbon, Carbon, Copper, Copper,

Copper, Copper, Copper, Copper, Copper, Copper, Copper, Copper,

Copper, Copper, Copper, Copper, Copper, Copper, Copper, Copper,

Copper, Copper, Copper, Copper, Copper, Copper, Copper, Copper,

Copper, Copper, Copper, Copper, Copper, Copper, Copper, Copper,

Copper, Copper, Copper, Copper, Copper, Copper, Copper, Copper]

# Define coordinates

central_region_coordinates = [[ 10.6926501976 , 3.8852998008 , 0.9035754 ],

[ 14.3073505176 , 3.8852998008 , 0.9035754 ],

[ 12.5000003576 , 5.6926497208 , 0.9035754 ],

[ 10.6926501976 , 7.4999998808 , 0.9035754 ],

[ 14.3073505176 , 7.4999998808 , 0.9035754 ],

[ 12.5000003576 , 9.3073500408 , 0.9035754 ],

[ 10.6926501976 , 11.1147002008 , 0.9035754 ],

[ 14.3073505176 , 11.1147002008 , 0.9035754 ],

[ 12.5000003576 , 3.8852998008 , 2.71092556 ],

[ 10.6926501976 , 5.6926497208 , 2.71092556 ],

[ 14.3073505176 , 5.6926497208 , 2.71092556 ],

[ 12.5000003576 , 7.4999998808 , 2.71092556 ],

[ 10.6926501976 , 9.3073500408 , 2.71092556 ],

[ 14.3073505176 , 9.3073500408 , 2.71092556 ],

[ 12.5000003576 , 11.1147002008 , 2.71092556 ],

[ 10.6926501976 , 3.8852998008 , 4.51827571 ],

[ 14.3073505176 , 3.8852998008 , 4.51827571 ],

[ 12.5000003576 , 5.6926497208 , 4.51827571 ],

[ 10.6926501976 , 7.4999998808 , 4.51827571 ],

[ 14.3073505176 , 7.4999998808 , 4.51827571 ],

[ 12.5000003576 , 9.3073500408 , 4.51827571 ],

[ 10.6926501976 , 11.1147002008 , 4.51827571 ],

[ 14.3073505176 , 11.1147002008 , 4.51827571 ],

[ 12.5000003576 , 3.8852998008 , 6.32562587 ],

[ 10.6926501976 , 5.6926497208 , 6.32562587 ],

[ 14.3073505176 , 5.6926497208 , 6.32562587 ],

[ 12.5000003576 , 7.4999998808 , 6.32562587 ],

[ 10.6926501976 , 9.3073500408 , 6.32562587 ],

[ 14.3073505176 , 9.3073500408 , 6.32562587 ],

[ 12.5000003576 , 11.1147002008 , 6.32562587 ],

[ 17.5967715978 , 9.3386067152 , 8.3295234528 ],

[ 12.4982122183 , 9.338783145 , 8.3295234528 ],

[ 15.0474427938 , 9.338783145 , 8.3295234528 ],

[ 7.4022172689 , 4.92195642 , 8.3305248108 ],

[ 8.6758559942 , 7.1302813292 , 8.3305248108 ],

[ 16.3218616247 , 7.1303704977 , 8.3305248108 ],

[ 11.2250322103 , 7.1307233572 , 8.3305248108 ],

[ 13.7725824117 , 7.1308115721 , 8.3305248108 ],

[ 7.4001153707 , 9.337459445 , 8.3305248108 ],

[ 9.9483741522 , 9.3377236128 , 8.3305248108 ],

[ 9.9506295919 , 4.9216035605 , 8.3315242615 ],

[ 18.8701728582 , 7.1298402548 , 8.3315242615 ],

[ 6.1271384954 , 7.1308115721 , 8.3315242615 ],

[ 2.3052273988 , 9.3372820616 , 8.3315242615 ],

[ 20.1456416845 , 9.3378123045 , 8.3315242615 ],

[ 12.4977124929 , 4.9221333265 , 8.3325237122 ],

[ 15.0472024679 , 4.923104167 , 8.3325237122 ],

[ 17.5956119299 , 4.9234575033 , 8.3325237122 ],

[ 1.0317283869 , 11.5441082716 , 8.3325237122 ],

[ 4.8536013365 , 4.9226626158 , 8.3335250702 ],

[ 4.8526204824 , 9.3372820616 , 8.3335250702 ],

[ 18.8703616857 , 11.5448979139 , 8.3335250702 ],

[ 16.3215926885 , 11.5455187559 , 8.3335250702 ],

[ 22.6925929784 , 4.9235452414 , 8.3345245209 ],

[ 3.5791333914 , 7.1301053763 , 8.3345245209 ],

[ 8.6743663549 , 11.5436686277 , 8.3345245209 ],

[ 11.2236922979 , 11.5448979139 , 8.3345245209 ],

[ 20.1432632208 , 4.9233692885 , 8.3355239716 ],

[ 3.5811084509 , 11.5424288511 , 8.3355239716 ],

[ 6.1270755529 , 11.5431383848 , 8.3355239716 ],

[ 13.7718518972 , 11.5467585325 , 8.3355239716 ],

[ 21.4163917303 , 7.1290453673 , 8.3365234222 ],

[ 16.3254722357 , 8.6050871611 , 10.3975204315 ],

[ 7.4034365415 , 6.3877586126 , 10.3985198822 ],

[ 18.8768924474 , 8.6034106016 , 10.3985198822 ],

[ 13.7747119665 , 8.6052645445 , 10.3985198822 ],

[ 9.9537853002 , 6.3889945746 , 10.3995193329 ],

[ 11.2250322103 , 8.6035870314 , 10.3995193329 ],

[ 8.6741193533 , 8.6019095183 , 10.4005206909 ],

[ 15.0479120016 , 6.3922604323 , 10.4025195923 ],

[ 12.5008720159 , 6.3902305365 , 10.4035209503 ],

[ 4.8547695875 , 6.3913773298 , 10.4055198517 ],

[ 17.5979522466 , 6.3919075728 , 10.4055198517 ],

[ 6.124993205 , 8.6024397612 , 10.4055198517 ],

[ 8.6783117056 , 4.1820815802 , 10.4065193024 ],

[ 21.4235728979 , 8.6018217802 , 10.4065193024 ],

[ 17.5978416204 , 10.8099688292 , 10.4065193024 ],

[ 15.0470327139 , 10.8105887175 , 10.4065193024 ],

[ 6.1300524473 , 4.1825236082 , 10.4075206604 ],

[ 13.77498281 , 4.1855243445 , 10.4075206604 ],

[ 9.9520400762 , 10.808118701 , 10.4075206604 ],

[ 20.1480315923 , 10.8086479902 , 10.4075206604 ],

[ 16.3233932256 , 4.1862305403 , 10.4085201111 ],

[ 3.5769883394 , 8.6006735563 , 10.4085201111 ],

[ 2.3083823919 , 10.8060883284 , 10.4085201111 ],

[ 12.4992822408 , 10.8076781035 , 10.4085201111 ],

[ 11.226362586 , 4.1837595701 , 10.4095195618 ],

[ 23.9682716131 , 4.1861423254 , 10.4105209198 ],

[ 21.4196132421 , 4.1876434088 , 10.4105209198 ],

[ 22.6926330328 , 6.3927901983 , 10.4115203705 ],

[ 7.401640296 , 10.8059080839 , 10.4115203705 ],

[ 18.8695625066 , 4.1894096136 , 10.4155200806 ],

[ 20.1413730383 , 6.3917301893 , 10.4155200806 ],

[ 4.8580693006 , 10.8042286635 , 10.4165195312 ],

[ 17.6028426885 , 7.8792494536 , 12.4435199585 ],

[ 7.4003232717 , 7.8543542624 , 12.4455207672 ],

[ 15.0510619878 , 7.8713043928 , 12.4475196686 ],

[ 9.9517930746 , 7.8621233702 , 12.4485210266 ],

[ 12.5014823675 , 7.8676842451 , 12.4485210266 ],

[ 8.68472898 , 5.6544164419 , 12.4695209351 ],

[ 16.3181327581 , 10.0786579847 , 12.4715198364 ],

[ 16.315292716 , 5.6593593359 , 12.4725192871 ],

[ 4.850279212 , 7.8617705107 , 12.4725192871 ],

[ 20.1516631841 , 7.8707741499 , 12.4725192871 ],

[ 6.1308635473 , 5.6543272734 , 12.4735206451 ],

[ 8.6862453222 , 10.0728281736 , 12.4745200958 ],

[ 18.8722518682 , 10.0786579847 , 12.4745200958 ],

[ 11.2296222448 , 5.6594485045 , 12.4775203552 ],

[ 13.7753823995 , 5.6615666151 , 12.4795192566 ],

[ 13.7727721929 , 10.0747784376 , 12.4795192566 ],

[ 11.2267020941 , 10.0721281767 , 12.4815200653 ],

[ 12.5062822103 , 3.4577444792 , 12.4845203247 ],

[ 7.4079812765 , 3.4532414675 , 12.4855197754 ],

[ 17.5894016027 , 3.4532414675 , 12.4865211334 ],

[ 22.6909126043 , 3.4532414675 , 12.4865211334 ],

[ 1.0334143638 , 10.0746887922 , 12.4865211334 ],

[ 3.581941247 , 5.6576822996 , 12.4875205841 ],

[ 15.0485318899 , 3.4532414675 , 12.4895194855 ],

[ 20.1410716772 , 3.4532414675 , 12.4895194855 ],

[ 9.9574121237 , 3.453594327 , 12.4895194855 ],

[ 4.855898261 , 3.4532414675 , 12.4905208435 ],

[ 3.5851904154 , 10.0723885298 , 12.4915202942 ],

[ 21.4170516729 , 5.6589182615 , 12.4925197449 ],

[ 2.3069642782 , 7.8663605452 , 12.4925197449 ],

[ 18.8651832342 , 5.6610373259 , 12.5005210724 ],

[ 6.1369675398 , 10.0718582869 , 12.5005210724 ],

[ 19.5994724035 , 8.3293017149 , 15.2635196533 ],

[ 5.3906463384 , 7.4332584143 , 15.2665199127 ],

[ 7.266028285 , 5.6183093786 , 15.3015197601 ],

[ 17.7235816717 , 10.1437186003 , 15.311519989 ],

[ 18.5279124975 , 8.1502693892 , 15.3155196991 ],

[ 6.4621514082 , 7.6120256186 , 15.3175205078 ],

[ 9.9774373769 , 5.4150885344 , 15.3295196381 ],

[ 17.8968318701 , 6.3442362547 , 15.3355201569 ],

[ 12.4450124502 , 5.3792475462 , 15.3395198669 ],

[ 7.4641383886 , 6.6904705763 , 15.3395198669 ],

[ 7.0937441587 , 9.4175289869 , 15.3415206757 ],

[ 15.0124725103 , 10.3460587263 , 15.3415206757 ],

[ 17.5255721807 , 9.0713833571 , 15.3455203857 ],

[ 14.9114221334 , 5.3143614531 , 15.3505195465 ],

[ 12.5454124212 , 10.3817280531 , 15.3515209045 ],

[ 9.9966491461 , 6.5061415434 , 15.3605197754 ],

[ 10.0795120001 , 10.4467886686 , 15.3625205841 ],

[ 12.467642188 , 6.4707411528 , 15.3665202942 ],

[ 14.993522048 , 9.2549170256 , 15.3675197449 ],

[ 12.5226320028 , 9.2901400328 , 15.3735202637 ],

[ 14.9397023916 , 6.4045313597 , 15.3805202332 ],

[ 11.2498019933 , 7.1785701513 , 15.386520752 ],

[ 8.8035310507 , 7.2244762182 , 15.386520752 ],

[ 10.0510219335 , 9.3566149473 , 15.386520752 ],

[ 16.1864818334 , 8.5368469954 , 15.3895210114 ],

[ 13.7406724691 , 8.582311511 , 15.3895210114 ],

[ 13.7089723348 , 7.1293982267 , 15.3915199127 ],

[ 11.2813028097 , 8.6314829588 , 15.3945201721 ],

[ 16.1298621893 , 7.0992072821 , 15.4015201416 ],

[ 8.8606122732 , 8.6620281935 , 15.4035209503 ],

[ 12.5015 , 7.867679960267, 18.4203265991 ],

[ 12.5015 , 6.060329801567, 20.2276767578 ],

[ 10.6941498413 , 7.867679960267, 20.2276767578 ],

[ 14.3088501587 , 7.867679960267, 20.2276767578 ],

[ 12.5015 , 9.675030118967, 20.2276767578 ],

[ 12.5015 , 4.252979881267, 22.0350269165 ],

[ 10.6941498413 , 6.060329801567, 22.0350269165 ],

[ 14.3088501587 , 6.060329801567, 22.0350269165 ],

[ 12.5015 , 7.867679960267, 22.0350269165 ],

[ 10.6941498413 , 9.675030118967, 22.0350269165 ],

[ 14.3088501587 , 9.675030118967, 22.0350269165 ],

[ 12.5015 , 11.482380277667, 22.0350269165 ],

[ 10.6941498413 , 4.252979881267, 23.8423770752 ],

[ 14.3088501587 , 4.252979881267, 23.8423770752 ],

[ 12.5015 , 6.060329801567, 23.8423770752 ],

[ 10.6941498413 , 7.867679960267, 23.8423770752 ],

[ 14.3088501587 , 7.867679960267, 23.8423770752 ],

[ 12.5015 , 9.675030118967, 23.8423770752 ],

[ 10.6941498413 , 11.482380277667, 23.8423770752 ],

[ 14.3088501587 , 11.482380277667, 23.8423770752 ],

[ 12.5015 , 4.252979881267, 25.6497272339 ],

[ 10.6941498413 , 6.060329801567, 25.6497272339 ],

[ 14.3088501587 , 6.060329801567, 25.6497272339 ],

[ 12.5015 , 7.867679960267, 25.6497272339 ],

[ 10.6941498413 , 9.675030118967, 25.6497272339 ],

[ 14.3088501587 , 9.675030118967, 25.6497272339 ],

[ 12.5015 , 11.482380277667, 25.6497272339 ],

[ 10.6941498413 , 4.252979881267, 27.4570773926 ],

[ 14.3088501587 , 4.252979881267, 27.4570773926 ],

[ 12.5015 , 6.060329801567, 27.4570773926 ],

[ 10.6941498413 , 7.867679960267, 27.4570773926 ],

[ 14.3088501587 , 7.867679960267, 27.4570773926 ],

[ 12.5015 , 9.675030118967, 27.4570773926 ],

[ 10.6941498413 , 11.482380277667, 27.4570773926 ],

[ 14.3088501587 , 11.482380277667, 27.4570773926 ],

[ 12.5015 , 4.252979881267, 29.2644275513 ],

[ 10.6941498413 , 6.060329801567, 29.2644275513 ],

[ 14.3088501587 , 6.060329801567, 29.2644275513 ],

[ 12.5015 , 7.867679960267, 29.2644275513 ],

[ 10.6941498413 , 9.675030118967, 29.2644275513 ],

[ 14.3088501587 , 9.675030118967, 29.2644275513 ],

[ 12.5015 , 11.482380277667, 29.2644275513 ]]*Angstrom

# Set up configuration

central_region = BulkConfiguration(

bravais_lattice=central_region_lattice,

elements=central_region_elements,

cartesian_coordinates=central_region_coordinates

)

device_configuration = DeviceConfiguration(

central_region,

[left_electrode, right_electrode],

equivalent_electrode_lengths=[7.22940064, 7.2293930054]*Angstrom,

transverse_electrode_repetitions=[[1, 1], [1, 1]],

)

# -------------------------------------------------------------

# Calculator

# -------------------------------------------------------------

#----------------------------------------

# Basis Set

#----------------------------------------

basis_set = [

GGABasis.Hydrogen_DoubleZetaPolarized,

GGABasis.Carbon_DoubleZetaPolarized,

GGABasis.Copper_DoubleZetaPolarized,

GGABasis.Selenium_DoubleZetaPolarized,

]

#----------------------------------------

# Numerical Accuracy Settings

#----------------------------------------

device_k_point_sampling = MonkhorstPackGrid(

na=2,

nc=261,

)

device_numerical_accuracy_parameters = NumericalAccuracyParameters(

density_mesh_cutoff=100.0*Hartree,

k_point_sampling=device_k_point_sampling,

)

#----------------------------------------

# Contour Integral Settings

#----------------------------------------

equilibrium_contour = SemiCircleContour(

integral_lower_bound=1.84481605655*Hartree,

circle_points=30,

)

contour_parameters = ContourParameters(

equilibrium_contour=equilibrium_contour,

)

#----------------------------------------

# Device Calculator

#----------------------------------------

calculator = DeviceLCAOCalculator(

basis_set=basis_set,

numerical_accuracy_parameters=device_numerical_accuracy_parameters,

contour_parameters=contour_parameters,

)

device_configuration.setCalculator(calculator)

nlprint(device_configuration)

nlsave('phy-Cu-ADS-Cu-C0-012-012.hdf5', device_configuration)

# -------------------------------------------------------------

# IV Characteristics

# -------------------------------------------------------------

# Kpoint sampling

kpoint_grid = MonkhorstPackGrid(

na=2,

)

# Gate-source voltages

gate_source_voltages = numpy.linspace(0, 0, 1)*Volt

# Drain-source voltages

drain_source_voltages = numpy.linspace(-0.12, 0.12, 7)*Volt

# File name.

filename = 'phy-Cu-ADS-Cu-C0-012-012.hdf5'

iv_characteristics = IVCharacteristics(

configuration=device_configuration,

filename=filename,

object_id='ivcharacteristics',

gate_regions=[],

gate_source_voltages=gate_source_voltages,

drain_source_voltages=drain_source_voltages,

energies=numpy.linspace(-2, 2, 201)*eV,

kpoints=kpoint_grid,

self_energy_calculator=RecursionSelfEnergy(),

energy_zero_parameter=AverageFermiLevel,

infinitesimal=1e-06*eV,

log_filename_prefix='ivcharacteristics_',

number_of_processes_per_task=None,

enforce_zero_transmission_in_band_gap=True,

)

iv_characteristics.update()

**chem-Cu-ADS-Cu-*c*0.py**

# -*- coding: utf-8 -*-

# -------------------------------------------------------------

# Two-probe Configuration

# -------------------------------------------------------------

# -------------------------------------------------------------

# Left Electrode

# -------------------------------------------------------------

# Set up lattice

vector_a = [25.0, 0.0, 0.0]*Angstrom

vector_b = [0.0, 15.0, 0.0]*Angstrom

vector_c = [0.0, 0.0, 3.61470032]*Angstrom

left_electrode_lattice = UnitCell(vector_a, vector_b, vector_c)

# Define elements

left_electrode_elements = [Copper, Copper, Copper, Copper, Copper, Copper, Copper, Copper,

Copper, Copper, Copper, Copper, Copper, Copper, Copper]

# Define coordinates

left_electrode_coordinates = [[ 10.6926496004 , 3.88530015845, 0.9035754 ],

[ 14.3073499204 , 3.88530015845, 0.9035754 ],

[ 12.4999997604 , 5.69265007845, 0.9035754 ],

[ 10.6926496004 , 7.50000023845, 0.9035754 ],

[ 14.3073499204 , 7.50000023845, 0.9035754 ],

[ 12.4999997604 , 9.30735039845, 0.9035754 ],

[ 10.6926496004 , 11.11470055845, 0.9035754 ],

[ 14.3073499204 , 11.11470055845, 0.9035754 ],

[ 12.4999997604 , 3.88530015845, 2.71092556 ],

[ 10.6926496004 , 5.69265007845, 2.71092556 ],

[ 14.3073499204 , 5.69265007845, 2.71092556 ],

[ 12.4999997604 , 7.50000023845, 2.71092556 ],

[ 10.6926496004 , 9.30735039845, 2.71092556 ],

[ 14.3073499204 , 9.30735039845, 2.71092556 ],

[ 12.4999997604 , 11.11470055845, 2.71092556 ]]*Angstrom

# Set up configuration

left_electrode = BulkConfiguration(

bravais_lattice=left_electrode_lattice,

elements=left_electrode_elements,

cartesian_coordinates=left_electrode_coordinates

)

# -------------------------------------------------------------

# Right Electrode

# -------------------------------------------------------------

# Set up lattice

vector_a = [25.0, 0.0, 0.0]*Angstrom

vector_b = [0.0, 15.0, 0.0]*Angstrom

vector_c = [0.0, 0.0, 3.6146965027]*Angstrom

right_electrode_lattice = UnitCell(vector_a, vector_b, vector_c)

# Define elements

right_electrode_elements = [Copper, Copper, Copper, Copper, Copper, Copper, Copper, Copper,

Copper, Copper, Copper, Copper, Copper, Copper, Copper]

# Define coordinates

right_electrode_coordinates = [[ 10.6941498413 , 4.252979881267, 0.9037728546 ],

[ 14.3088501587 , 4.252979881267, 0.9037728546 ],

[ 12.5015 , 6.060329801567, 0.9037728546 ],

[ 10.6941498413 , 7.867679960267, 0.9037728546 ],

[ 14.3088501587 , 7.867679960267, 0.9037728546 ],

[ 12.5015 , 9.675030118967, 0.9037728546 ],

[ 10.6941498413 , 11.482380277667, 0.9037728546 ],

[ 14.3088501587 , 11.482380277667, 0.9037728546 ],

[ 12.5015 , 4.252979881267, 2.7111230133 ],

[ 10.6941498413 , 6.060329801567, 2.7111230133 ],

[ 14.3088501587 , 6.060329801567, 2.7111230133 ],

[ 12.5015 , 7.867679960267, 2.7111230133 ],

[ 10.6941498413 , 9.675030118967, 2.7111230133 ],

[ 14.3088501587 , 9.675030118967, 2.7111230133 ],

[ 12.5015 , 11.482380277667, 2.7111230133 ]]*Angstrom

# Set up configuration

right_electrode = BulkConfiguration(

bravais_lattice=right_electrode_lattice,

elements=right_electrode_elements,

cartesian_coordinates=right_electrode_coordinates

)

# -------------------------------------------------------------

# Central Region

# -------------------------------------------------------------

# Set up lattice

vector_a = [25.0, 0.0, 0.0]*Angstrom

vector_b = [0.0, 15.0, 0.0]*Angstrom

vector_c = [0.0, 0.0, 30.167997226]*Angstrom

central_region_lattice = UnitCell(vector_a, vector_b, vector_c)

# Define elements

central_region_elements = [Copper, Copper, Copper, Copper, Copper, Copper, Copper, Copper,

Copper, Copper, Copper, Copper, Copper, Copper, Copper, Copper,

Copper, Copper, Copper, Copper, Copper, Copper, Copper, Copper,

Copper, Copper, Copper, Copper, Copper, Copper, Copper, Copper,

Copper, Copper, Copper, Copper, Copper, Copper, Copper, Copper,

Copper, Copper, Copper, Copper, Copper, Copper, Copper, Copper,

Copper, Copper, Copper, Copper, Copper, Copper, Copper, Copper,

Copper, Copper, Copper, Copper, Copper, Copper, Copper, Copper,

Copper, Copper, Copper, Copper, Copper, Copper, Copper, Copper,

Copper, Copper, Copper, Copper, Copper, Copper, Copper, Copper,

Copper, Copper, Copper, Copper, Copper, Copper, Copper, Copper,

Copper, Copper, Copper, Copper, Copper, Copper, Copper, Copper,

Copper, Copper, Copper, Copper, Copper, Copper, Copper, Copper,

Copper, Copper, Copper, Copper, Copper, Copper, Copper, Copper,

Copper, Copper, Copper, Copper, Copper, Copper, Copper, Copper,

Copper, Copper, Copper, Copper, Copper, Copper, Carbon, Carbon,

Carbon, Carbon, Carbon, Carbon, Carbon, Hydrogen, Carbon, Hydrogen,

Carbon, Hydrogen, Hydrogen, Carbon, Hydrogen, Carbon, Hydrogen,

Carbon, Selenium, Selenium, Carbon, Carbon, Carbon, Carbon, Carbon,

Carbon, Hydrogen, Hydrogen, Hydrogen, Hydrogen, Copper, Copper,

Copper, Copper, Copper, Copper, Copper, Copper, Copper, Copper,

Copper, Copper, Copper, Copper, Copper, Copper, Copper, Copper,

Copper, Copper, Copper, Copper, Copper, Copper, Copper, Copper,

Copper, Copper, Copper, Copper, Copper, Copper, Copper, Copper,

Copper, Copper, Copper, Copper, Copper, Copper, Copper, Copper]

# Define coordinates

central_region_coordinates = [[ 10.6926496004 , 3.88530015845 , 0.9035754 ],

[ 14.3073499204 , 3.88530015845 , 0.9035754 ],

[ 12.4999997604 , 5.69265007845 , 0.9035754 ],

[ 10.6926496004 , 7.50000023845 , 0.9035754 ],

[ 14.3073499204 , 7.50000023845 , 0.9035754 ],

[ 12.4999997604 , 9.30735039845 , 0.9035754 ],

[ 10.6926496004 , 11.11470055845 , 0.9035754 ],

[ 14.3073499204 , 11.11470055845 , 0.9035754 ],

[ 12.4999997604 , 3.88530015845 , 2.71092556 ],

[ 10.6926496004 , 5.69265007845 , 2.71092556 ],

[ 14.3073499204 , 5.69265007845 , 2.71092556 ],

[ 12.4999997604 , 7.50000023845 , 2.71092556 ],

[ 10.6926496004 , 9.30735039845 , 2.71092556 ],

[ 14.3073499204 , 9.30735039845 , 2.71092556 ],

[ 12.4999997604 , 11.11470055845 , 2.71092556 ],

[ 10.6926496004 , 3.88530015845 , 4.51827571 ],

[ 14.3073499204 , 3.88530015845 , 4.51827571 ],

[ 12.4999997604 , 5.69265007845 , 4.51827571 ],

[ 10.6926496004 , 7.50000023845 , 4.51827571 ],

[ 14.3073499204 , 7.50000023845 , 4.51827571 ],

[ 12.4999997604 , 9.30735039845 , 4.51827571 ],

[ 10.6926496004 , 11.11470055845 , 4.51827571 ],

[ 14.3073499204 , 11.11470055845 , 4.51827571 ],

[ 12.4999997604 , 3.88530015845 , 6.32562587 ],

[ 10.6926496004 , 5.69265007845 , 6.32562587 ],

[ 14.3073499204 , 5.69265007845 , 6.32562587 ],

[ 12.4999997604 , 7.50000023845 , 6.32562587 ],

[ 10.6926496004 , 9.30735039845 , 6.32562587 ],

[ 14.3073499204 , 9.30735039845 , 6.32562587 ],

[ 12.4999997604 , 11.11470055845 , 6.32562587 ],

[ 3.5799309611 , 11.55716919905 , 8.3275264587 ],

[ 15.0424889922 , 9.34946560865 , 8.3295253601 ],

[ 8.6729840636 , 11.56228852275 , 8.3295253601 ],

[ 11.2219085097 , 11.56317830085 , 8.3295253601 ],

[ 12.4971389175 , 9.34840607645 , 8.3305267181 ],

[ 6.1268658042 , 11.56008839615 , 8.3305267181 ],

[ 7.4030150771 , 9.34725880625 , 8.3315261688 ],

[ 2.3047119975 , 9.34911274915 , 8.3315261688 ],

[ 18.8709697127 , 11.55831837655 , 8.3315261688 ],

[ 13.7716493011 , 11.56228852275 , 8.3315261688 ],

[ 9.9510316253 , 4.93961262705 , 8.3325256195 ],

[ 4.8561820388 , 9.34734654425 , 8.3325256195 ],

[ 17.592489183 , 9.34955334665 , 8.3325256195 ],

[ 20.1437987685 , 9.35052514075 , 8.3325256195 ],

[ 16.3206691146 , 11.55911850935 , 8.3325256195 ],

[ 1.0331498981 , 11.55964875225 , 8.3325256195 ],

[ 9.9480122924 , 9.34611058235 , 8.3335269775 ],

[ 22.6923789382 , 4.93696475035 , 8.3345264282 ],

[ 4.8549208045 , 4.93731760985 , 8.3345264282 ],

[ 7.4022120833 , 4.93996596335 , 8.3345264282 ],

[ 3.5815238357 , 7.14255261425 , 8.3345264282 ],

[ 20.1435584426 , 4.93908381465 , 8.3355258789 ],

[ 17.5950984359 , 4.94058394435 , 8.3355258789 ],

[ 6.1295790076 , 7.14211153985 , 8.3355258789 ],

[ 18.8674086928 , 7.14202284815 , 8.3365253296 ],

[ 12.4989890456 , 4.94323277475 , 8.3375266876 ],

[ 15.0471991897 , 4.94393897055 , 8.3375266876 ],

[ 21.4148597121 , 7.14193463325 , 8.3375266876 ],

[ 8.6792153716 , 7.14105153085 , 8.339525589 ],

[ 11.2287492156 , 7.14193463325 , 8.339525589 ],

[ 16.3195590377 , 7.14069867135 , 8.3435252991 ],

[ 13.7724189162 , 7.14131665235 , 8.3445266571 ],

[ 9.9445418716 , 10.81861901285 , 10.3835281219 ],

[ 12.4942788482 , 10.82444882395 , 10.3865283813 ],

[ 7.3989838958 , 10.81438851355 , 10.3915275421 ],

[ 8.6754521728 , 4.19232296945 , 10.3925289001 ],

[ 15.0467690826 , 10.82656884195 , 10.3935283508 ],

[ 4.85342592 , 10.81367897995 , 10.3955272522 ],

[ 18.8749980331 , 8.61868405345 , 10.4005283203 ],

[ 17.6007880569 , 10.82532906535 , 10.4005283203 ],

[ 2.3080720305 , 10.81685853005 , 10.401527771 ],

[ 11.2252387404 , 4.20123887065 , 10.4035285797 ],

[ 16.3124694228 , 8.61912465095 , 10.4035285797 ],

[ 20.1508292556 , 10.82391858105 , 10.4035285797 ],

[ 3.5782069564 , 8.61162114145 , 10.4045280304 ],

[ 13.7743186355 , 4.20750689505 , 10.4065288391 ],

[ 22.6971186996 , 6.40797495845 , 10.4075282898 ],

[ 6.1288227439 , 4.20088553435 , 10.4085277405 ],

[ 23.9680690169 , 4.20097374915 , 10.4085277405 ],

[ 16.3220691085 , 4.20865464215 , 10.4085277405 ],

[ 21.4198493362 , 8.61426949505 , 10.4085277405 ],

[ 21.420368135 , 4.20397591595 , 10.4095290985 ],

[ 4.8575667739 , 6.40488457685 , 10.4125274506 ],

[ 6.1290659308 , 8.60738396645 , 10.4125274506 ],

[ 11.2245187163 , 8.61117959025 , 10.4125274506 ],

[ 13.7693585753 , 8.61524033545 , 10.4135288086 ],

[ 18.8718585372 , 4.20768380165 , 10.4145282593 ],

[ 8.6706475616 , 8.60508751875 , 10.4185279694 ],

[ 9.9620370269 , 6.40717959405 , 10.4205287781 ],

[ 7.4011368156 , 6.41044688225 , 10.4205287781 ],

[ 20.141158998 , 6.40656256675 , 10.4235290375 ],

[ 17.5994796157 , 6.40444350245 , 10.4285281982 ],

[ 15.0432690978 , 6.41159367565 , 10.4465278473 ],

[ 12.5025491118 , 6.41097664835 , 10.448528656 ],

[ 8.6872720122 , 5.64647078515 , 12.4315284576 ],

[ 17.5970286727 , 7.91191363335 , 12.434528717 ],

[ 12.503269136 , 3.43682169915 , 12.4465278473 ],

[ 13.7715491653 , 10.12773919105 , 12.447527298 ],

[ 15.0574387908 , 3.44732785225 , 12.448528656 ],

[ 11.2188491225 , 10.11361908915 , 12.4495281067 ],

[ 9.947875917 , 3.44538474085 , 12.4565280762 ],

[ 16.3248996139 , 10.11529850965 , 12.4595283356 ],

[ 8.6783398986 , 10.09710907935 , 12.4635280457 ],

[ 17.5960196853 , 3.46613073355 , 12.4665283051 ],

[ 7.4027771354 , 3.45624375345 , 12.4695285645 ],

[ 18.8733691573 , 10.10107827185 , 12.4715274658 ],

[ 6.1242699027 , 10.09066891675 , 12.4725288239 ],

[ 4.8411001563 , 7.87766051295 , 12.4795287933 ],

[ 9.9422063232 , 7.89178586005 , 12.4795287933 ],

[ 20.1558493972 , 3.46966171265 , 12.480528244 ],

[ 20.1448783279 , 7.89063763625 , 12.4815276947 ],

[ 3.5783550143 , 10.08351826675 , 12.4835285034 ],

[ 21.4328498244 , 5.67675185205 , 12.4845279541 ],

[ 1.0319309831 , 10.08924889565 , 12.4845279541 ],

[ 4.8559951186 , 3.46613073355 , 12.4865287628 ],

[ 2.3037478328 , 7.88110375405 , 12.4875282135 ],

[ 3.5876440406 , 5.67321991925 , 12.4885276642 ],

[ 22.6995696425 , 3.47213363655 , 12.4895290222 ],

[ 6.1311640143 , 5.66333270075 , 12.4895290222 ],

[ 11.2323693633 , 5.64161562925 , 12.4905284729 ],

[ 15.0495786071 , 7.92506670955 , 12.4905284729 ],

[ 16.3312396407 , 5.66633391385 , 12.4955276337 ],

[ 12.4942387939 , 7.92612671855 , 12.4975284424 ],

[ 7.3850778937 , 7.88640093805 , 12.5115283813 ],

[ 13.782109201 , 5.64143872265 , 12.5155280914 ],

[ 18.8853091598 , 5.66854071625 , 12.5215286102 ],

[ 12.9113587737 , 8.13729310035 , 14.6945289459 ],

[ 13.0834893584 , 5.30659270285 , 14.7055286255 ],

[ 14.2906188369 , 6.06438851355 , 14.7895282593 ],

[ 14.2116689086 , 7.51756691935 , 14.8045276489 ],

[ 11.7043790221 , 7.37817263605 , 14.8075279083 ],

[ 11.7805384994 , 5.92631888395 , 14.8165286865 ],

[ 15.5819491744 , 5.43795371055 , 14.8685287323 ],

[ 13.1451587081 , 4.23010659225 , 14.8795284119 ],

[ 10.417589128 , 8.00381302835 , 14.8825286713 ],

[ 12.8526391387 , 9.21148419385 , 14.8825286713 ],

[ 15.3983086944 , 8.28154206275 , 14.9235290375 ],

[ 15.6352185607 , 4.35131478315 , 14.9445289459 ],

[ 10.3650893569 , 9.09159970285 , 14.948528656 ],

[ 10.596439302 , 5.16322684295 , 14.9615272369 ],

[ 15.3206786513 , 9.36659169205 , 15.012527832 ],

[ 16.7231788039 , 6.23574090005 , 15.0285285797 ],

[ 10.6747292876 , 4.07702851295 , 15.0385288086 ],

[ 9.2784489989 , 7.20770382885 , 15.0655273285 ],

[ 18.5574797988 , 5.63216996195 , 15.0765289154 ],

[ 7.4520000815 , 7.82098460205 , 15.0765289154 ],

[ 16.6632880569 , 7.65307688715 , 15.0855277863 ],

[ 9.33115381 , 5.79116177565 , 15.1165279236 ],

[ 17.938159883 , 8.30096364025 , 15.2335285034 ],

[ 8.0496606231 , 5.14910197265 , 15.2535289612 ],

[ 6.9623531699 , 5.97760987285 , 15.2735275116 ],

[ 19.0282687545 , 7.47607493405 , 15.2755283203 ],

[ 18.033359468 , 9.38680768015 , 15.2845290985 ],

[ 7.9491547942 , 4.06396365165 , 15.3125289764 ],

[ 20.0781096816 , 7.74285674095 , 15.3655284729 ],

[ 5.9118980765 , 5.71859574325 , 15.3735278931 ],

[ 12.5015 , 7.867679960267, 18.4203265991 ],

[ 12.5015 , 6.060329801567, 20.2276767578 ],

[ 10.6941498413 , 7.867679960267, 20.2276767578 ],

[ 14.3088501587 , 7.867679960267, 20.2276767578 ],

[ 12.5015 , 9.675030118967, 20.2276767578 ],

[ 12.5015 , 4.252979881267, 22.0350269165 ],

[ 10.6941498413 , 6.060329801567, 22.0350269165 ],

[ 14.3088501587 , 6.060329801567, 22.0350269165 ],

[ 12.5015 , 7.867679960267, 22.0350269165 ],

[ 10.6941498413 , 9.675030118967, 22.0350269165 ],

[ 14.3088501587 , 9.675030118967, 22.0350269165 ],

[ 12.5015 , 11.482380277667, 22.0350269165 ],

[ 10.6941498413 , 4.252979881267, 23.8423770752 ],

[ 14.3088501587 , 4.252979881267, 23.8423770752 ],

[ 12.5015 , 6.060329801567, 23.8423770752 ],

[ 10.6941498413 , 7.867679960267, 23.8423770752 ],

[ 14.3088501587 , 7.867679960267, 23.8423770752 ],

[ 12.5015 , 9.675030118967, 23.8423770752 ],

[ 10.6941498413 , 11.482380277667, 23.8423770752 ],

[ 14.3088501587 , 11.482380277667, 23.8423770752 ],

[ 12.5015 , 4.252979881267, 25.6497272339 ],

[ 10.6941498413 , 6.060329801567, 25.6497272339 ],

[ 14.3088501587 , 6.060329801567, 25.6497272339 ],

[ 12.5015 , 7.867679960267, 25.6497272339 ],

[ 10.6941498413 , 9.675030118967, 25.6497272339 ],

[ 14.3088501587 , 9.675030118967, 25.6497272339 ],

[ 12.5015 , 11.482380277667, 25.6497272339 ],

[ 10.6941498413 , 4.252979881267, 27.4570773926 ],

[ 14.3088501587 , 4.252979881267, 27.4570773926 ],

[ 12.5015 , 6.060329801567, 27.4570773926 ],

[ 10.6941498413 , 7.867679960267, 27.4570773926 ],

[ 14.3088501587 , 7.867679960267, 27.4570773926 ],

[ 12.5015 , 9.675030118967, 27.4570773926 ],

[ 10.6941498413 , 11.482380277667, 27.4570773926 ],

[ 14.3088501587 , 11.482380277667, 27.4570773926 ],

[ 12.5015 , 4.252979881267, 29.2644275513 ],

[ 10.6941498413 , 6.060329801567, 29.2644275513 ],

[ 14.3088501587 , 6.060329801567, 29.2644275513 ],

[ 12.5015 , 7.867679960267, 29.2644275513 ],

[ 10.6941498413 , 9.675030118967, 29.2644275513 ],

[ 14.3088501587 , 9.675030118967, 29.2644275513 ],

[ 12.5015 , 11.482380277667, 29.2644275513 ]]*Angstrom

# Set up configuration

central_region = BulkConfiguration(

bravais_lattice=central_region_lattice,

elements=central_region_elements,

cartesian_coordinates=central_region_coordinates

)

device_configuration = DeviceConfiguration(

central_region,

[left_electrode, right_electrode],

equivalent_electrode_lengths=[7.22940064, 7.2293930054]*Angstrom,

transverse_electrode_repetitions=[[1, 1], [1, 1]],

)

# -------------------------------------------------------------

# Calculator

# -------------------------------------------------------------

#----------------------------------------

# Basis Set

#----------------------------------------

basis_set = [

GGABasis.Hydrogen_DoubleZetaPolarized,

GGABasis.Carbon_DoubleZetaPolarized,

GGABasis.Copper_DoubleZetaPolarized,

GGABasis.Selenium_DoubleZetaPolarized,

]

#----------------------------------------

# Numerical Accuracy Settings

#----------------------------------------

device_k_point_sampling = MonkhorstPackGrid(

na=2,

nc=261,

)

device_numerical_accuracy_parameters = NumericalAccuracyParameters(

density_mesh_cutoff=100.0*Hartree,

k_point_sampling=device_k_point_sampling,

)

#----------------------------------------

# Contour Integral Settings

#----------------------------------------

equilibrium_contour = SemiCircleContour(

integral_lower_bound=1.84481605655*Hartree,

circle_points=30,

)

contour_parameters = ContourParameters(

equilibrium_contour=equilibrium_contour,

)

#----------------------------------------

# Device Calculator

#----------------------------------------

calculator = DeviceLCAOCalculator(

basis_set=basis_set,

numerical_accuracy_parameters=device_numerical_accuracy_parameters,

contour_parameters=contour_parameters,

)

device_configuration.setCalculator(calculator)

nlprint(device_configuration)

nlsave('chem-Cu-ADS-Cu-cp-02-02.hdf5', device_configuration)

# -------------------------------------------------------------

# IV Characteristics

# -------------------------------------------------------------

# Kpoint sampling

kpoint_grid = MonkhorstPackGrid(

na=2,

)

# Gate-source voltages

gate_source_voltages = numpy.linspace(0, 0, 1)*Volt

# Drain-source voltages

drain_source_voltages = numpy.linspace(-0.12, 0.12, 7)*Volt

# File name.

filename = 'chem-Cu-ADS-Cu-cp-02-02.hdf5'

iv_characteristics = IVCharacteristics(

configuration=device_configuration,

filename=filename,

object_id='ivcharacteristics',

gate_regions=[],

gate_source_voltages=gate_source_voltages,

drain_source_voltages=drain_source_voltages,

energies=numpy.linspace(-2, 2, 201)*eV,

kpoints=kpoint_grid,

self_energy_calculator=RecursionSelfEnergy(),

energy_zero_parameter=AverageFermiLevel,

infinitesimal=1e-06*eV,

log_filename_prefix='ivcharacteristics_',

number_of_processes_per_task=None,

enforce_zero_transmission_in_band_gap=True,

)

iv_characteristics.update()

**phys-Cu-ADS-Cu-*c*1.py**

# -*- coding: utf-8 -*-

# -------------------------------------------------------------

# Two-probe Configuration

# -------------------------------------------------------------

# -------------------------------------------------------------

# Left Electrode

# -------------------------------------------------------------

# Set up lattice

vector_a = [25.0, 0.0, 0.0]*Angstrom

vector_b = [0.0, 15.0, 0.0]*Angstrom

vector_c = [0.0, 0.0, 3.61470032]*Angstrom

left_electrode_lattice = UnitCell(vector_a, vector_b, vector_c)

# Define elements

left_electrode_elements = [Copper, Copper, Copper, Copper, Copper, Copper, Copper, Copper,

Copper, Copper, Copper, Copper, Copper, Copper, Copper]

# Define coordinates

left_electrode_coordinates = [[ 10.6926501976, 3.8852998008, 0.9035754 ],

[ 14.3073505176, 3.8852998008, 0.9035754 ],

[ 12.5000003576, 5.6926497208, 0.9035754 ],

[ 10.6926501976, 7.4999998808, 0.9035754 ],

[ 14.3073505176, 7.4999998808, 0.9035754 ],

[ 12.5000003576, 9.3073500408, 0.9035754 ],

[ 10.6926501976, 11.1147002008, 0.9035754 ],

[ 14.3073505176, 11.1147002008, 0.9035754 ],

[ 12.5000003576, 3.8852998008, 2.71092556 ],

[ 10.6926501976, 5.6926497208, 2.71092556 ],

[ 14.3073505176, 5.6926497208, 2.71092556 ],

[ 12.5000003576, 7.4999998808, 2.71092556 ],

[ 10.6926501976, 9.3073500408, 2.71092556 ],

[ 14.3073505176, 9.3073500408, 2.71092556 ],

[ 12.5000003576, 11.1147002008, 2.71092556 ]]*Angstrom

# Set up configuration

left_electrode = BulkConfiguration(

bravais_lattice=left_electrode_lattice,

elements=left_electrode_elements,

cartesian_coordinates=left_electrode_coordinates

)

# -------------------------------------------------------------

# Right Electrode

# -------------------------------------------------------------

# Set up lattice

vector_a = [25.0, 0.0, 0.0]*Angstrom

vector_b = [0.0, 15.0, 0.0]*Angstrom

vector_c = [0.0, 0.0, 3.6146965027]*Angstrom

right_electrode_lattice = UnitCell(vector_a, vector_b, vector_c)

# Define elements

right_electrode_elements = [Copper, Copper, Copper, Copper, Copper, Copper, Copper, Copper,

Copper, Copper, Copper, Copper, Copper, Copper, Copper]

# Define coordinates

right_electrode_coordinates = [[ 8.1665798413 , 4.247419881267, 0.9037728546 ],

[ 11.7812801587 , 4.247419881267, 0.9037728546 ],

[ 9.97393 , 6.054769801567, 0.9037728546 ],

[ 8.1665798413 , 7.862119960267, 0.9037728546 ],

[ 11.7812801587 , 7.862119960267, 0.9037728546 ],

[ 9.97393 , 9.669470118967, 0.9037728546 ],

[ 8.1665798413 , 11.476820277667, 0.9037728546 ],

[ 11.7812801587 , 11.476820277667, 0.9037728546 ],

[ 9.97393 , 4.247419881267, 2.7111230133 ],

[ 8.1665798413 , 6.054769801567, 2.7111230133 ],

[ 11.7812801587 , 6.054769801567, 2.7111230133 ],

[ 9.97393 , 7.862119960267, 2.7111230133 ],

[ 8.1665798413 , 9.669470118967, 2.7111230133 ],

[ 11.7812801587 , 9.669470118967, 2.7111230133 ],

[ 9.97393 , 11.476820277667, 2.7111230133 ]]*Angstrom

# Set up configuration

right_electrode = BulkConfiguration(

bravais_lattice=right_electrode_lattice,

elements=right_electrode_elements,

cartesian_coordinates=right_electrode_coordinates

)

# -------------------------------------------------------------

# Central Region

# -------------------------------------------------------------

# Set up lattice

vector_a = [25.0, 0.0, 0.0]*Angstrom

vector_b = [0.0, 15.0, 0.0]*Angstrom

vector_c = [0.0, 0.0, 30.167997226]*Angstrom

central_region_lattice = UnitCell(vector_a, vector_b, vector_c)

# Define elements

central_region_elements = [Copper, Copper, Copper, Copper, Copper, Copper, Copper, Copper,

Copper, Copper, Copper, Copper, Copper, Copper, Copper, Copper,

Copper, Copper, Copper, Copper, Copper, Copper, Copper, Copper,

Copper, Copper, Copper, Copper, Copper, Copper, Copper, Copper,

Copper, Copper, Copper, Copper, Copper, Copper, Copper, Copper,

Copper, Copper, Copper, Copper, Copper, Copper, Copper, Copper,

Copper, Copper, Copper, Copper, Copper, Copper, Copper, Copper,

Copper, Copper, Copper, Copper, Copper, Copper, Copper, Copper,

Copper, Copper, Copper, Copper, Copper, Copper, Copper, Copper,

Copper, Copper, Copper, Copper, Copper, Copper, Copper, Copper,

Copper, Copper, Copper, Copper, Copper, Copper, Copper, Copper,

Copper, Copper, Copper, Copper, Copper, Copper, Copper, Copper,

Copper, Copper, Copper, Copper, Copper, Copper, Copper, Copper,

Copper, Copper, Copper, Copper, Copper, Copper, Copper, Copper,

Copper, Copper, Copper, Copper, Copper, Copper, Copper, Copper,

Copper, Copper, Copper, Copper, Copper, Copper, Hydrogen, Hydrogen,

Hydrogen, Hydrogen, Carbon, Carbon, Hydrogen, Selenium, Hydrogen,

Carbon, Selenium, Hydrogen, Carbon, Hydrogen, Hydrogen, Carbon,

Hydrogen, Carbon, Carbon, Carbon, Carbon, Carbon, Carbon, Carbon,

Carbon, Carbon, Carbon, Carbon, Carbon, Carbon, Copper, Copper,

Copper, Copper, Copper, Copper, Copper, Copper, Copper, Copper,

Copper, Copper, Copper, Copper, Copper, Copper, Copper, Copper,

Copper, Copper, Copper, Copper, Copper, Copper, Copper, Copper,

Copper, Copper, Copper, Copper, Copper, Copper, Copper, Copper,

Copper, Copper, Copper, Copper, Copper, Copper, Copper, Copper]

# Define coordinates

central_region_coordinates = [[ 10.6926501976 , 3.8852998008 , 0.9035754 ],

[ 14.3073505176 , 3.8852998008 , 0.9035754 ],

[ 12.5000003576 , 5.6926497208 , 0.9035754 ],

[ 10.6926501976 , 7.4999998808 , 0.9035754 ],

[ 14.3073505176 , 7.4999998808 , 0.9035754 ],

[ 12.5000003576 , 9.3073500408 , 0.9035754 ],

[ 10.6926501976 , 11.1147002008 , 0.9035754 ],

[ 14.3073505176 , 11.1147002008 , 0.9035754 ],

[ 12.5000003576 , 3.8852998008 , 2.71092556 ],

[ 10.6926501976 , 5.6926497208 , 2.71092556 ],

[ 14.3073505176 , 5.6926497208 , 2.71092556 ],

[ 12.5000003576 , 7.4999998808 , 2.71092556 ],

[ 10.6926501976 , 9.3073500408 , 2.71092556 ],

[ 14.3073505176 , 9.3073500408 , 2.71092556 ],

[ 12.5000003576 , 11.1147002008 , 2.71092556 ],

[ 10.6926501976 , 3.8852998008 , 4.51827571 ],

[ 14.3073505176 , 3.8852998008 , 4.51827571 ],

[ 12.5000003576 , 5.6926497208 , 4.51827571 ],

[ 10.6926501976 , 7.4999998808 , 4.51827571 ],

[ 14.3073505176 , 7.4999998808 , 4.51827571 ],

[ 12.5000003576 , 9.3073500408 , 4.51827571 ],

[ 10.6926501976 , 11.1147002008 , 4.51827571 ],

[ 14.3073505176 , 11.1147002008 , 4.51827571 ],

[ 12.5000003576 , 3.8852998008 , 6.32562587 ],

[ 10.6926501976 , 5.6926497208 , 6.32562587 ],

[ 14.3073505176 , 5.6926497208 , 6.32562587 ],

[ 12.5000003576 , 7.4999998808 , 6.32562587 ],

[ 10.6926501976 , 9.3073500408 , 6.32562587 ],

[ 14.3073505176 , 9.3073500408 , 6.32562587 ],

[ 12.5000003576 , 11.1147002008 , 6.32562587 ],

[ 17.5967715978 , 9.3386067152 , 8.3295234528 ],

[ 12.4982122183 , 9.338783145 , 8.3295234528 ],

[ 15.0474427938 , 9.338783145 , 8.3295234528 ],

[ 7.4022172689 , 4.92195642 , 8.3305248108 ],

[ 8.6758559942 , 7.1302813292 , 8.3305248108 ],

[ 16.3218616247 , 7.1303704977 , 8.3305248108 ],

[ 11.2250322103 , 7.1307233572 , 8.3305248108 ],

[ 13.7725824117 , 7.1308115721 , 8.3305248108 ],

[ 7.4001153707 , 9.337459445 , 8.3305248108 ],

[ 9.9483741522 , 9.3377236128 , 8.3305248108 ],

[ 9.9506295919 , 4.9216035605 , 8.3315242615 ],

[ 18.8701728582 , 7.1298402548 , 8.3315242615 ],

[ 6.1271384954 , 7.1308115721 , 8.3315242615 ],

[ 2.3052273988 , 9.3372820616 , 8.3315242615 ],

[ 20.1456416845 , 9.3378123045 , 8.3315242615 ],

[ 12.4977124929 , 4.9221333265 , 8.3325237122 ],

[ 15.0472024679 , 4.923104167 , 8.3325237122 ],

[ 17.5956119299 , 4.9234575033 , 8.3325237122 ],

[ 1.0317283869 , 11.5441082716 , 8.3325237122 ],

[ 4.8536013365 , 4.9226626158 , 8.3335250702 ],

[ 4.8526204824 , 9.3372820616 , 8.3335250702 ],

[ 18.8703616857 , 11.5448979139 , 8.3335250702 ],

[ 16.3215926885 , 11.5455187559 , 8.3335250702 ],

[ 22.6925929784 , 4.9235452414 , 8.3345245209 ],

[ 3.5791333914 , 7.1301053763 , 8.3345245209 ],

[ 8.6743663549 , 11.5436686277 , 8.3345245209 ],

[ 11.2236922979 , 11.5448979139 , 8.3345245209 ],

[ 20.1432632208 , 4.9233692885 , 8.3355239716 ],

[ 3.5811084509 , 11.5424288511 , 8.3355239716 ],

[ 6.1270755529 , 11.5431383848 , 8.3355239716 ],

[ 13.7718518972 , 11.5467585325 , 8.3355239716 ],

[ 21.4163917303 , 7.1290453673 , 8.3365234222 ],

[ 16.3254722357 , 8.6050871611 , 10.3975204315 ],

[ 7.4034365415 , 6.3877586126 , 10.3985198822 ],

[ 18.8768924474 , 8.6034106016 , 10.3985198822 ],

[ 13.7747119665 , 8.6052645445 , 10.3985198822 ],

[ 9.9537853002 , 6.3889945746 , 10.3995193329 ],

[ 11.2250322103 , 8.6035870314 , 10.3995193329 ],

[ 8.6741193533 , 8.6019095183 , 10.4005206909 ],

[ 15.0479120016 , 6.3922604323 , 10.4025195923 ],

[ 12.5008720159 , 6.3902305365 , 10.4035209503 ],

[ 4.8547695875 , 6.3913773298 , 10.4055198517 ],

[ 17.5979522466 , 6.3919075728 , 10.4055198517 ],

[ 6.124993205 , 8.6024397612 , 10.4055198517 ],

[ 8.6783117056 , 4.1820815802 , 10.4065193024 ],

[ 21.4235728979 , 8.6018217802 , 10.4065193024 ],

[ 17.5978416204 , 10.8099688292 , 10.4065193024 ],

[ 15.0470327139 , 10.8105887175 , 10.4065193024 ],

[ 6.1300524473 , 4.1825236082 , 10.4075206604 ],

[ 13.77498281 , 4.1855243445 , 10.4075206604 ],

[ 9.9520400762 , 10.808118701 , 10.4075206604 ],

[ 20.1480315923 , 10.8086479902 , 10.4075206604 ],

[ 16.3233932256 , 4.1862305403 , 10.4085201111 ],

[ 3.5769883394 , 8.6006735563 , 10.4085201111 ],

[ 2.3083823919 , 10.8060883284 , 10.4085201111 ],

[ 12.4992822408 , 10.8076781035 , 10.4085201111 ],

[ 11.226362586 , 4.1837595701 , 10.4095195618 ],

[ 23.9682716131 , 4.1861423254 , 10.4105209198 ],

[ 21.4196132421 , 4.1876434088 , 10.4105209198 ],

[ 22.6926330328 , 6.3927901983 , 10.4115203705 ],

[ 7.401640296 , 10.8059080839 , 10.4115203705 ],

[ 18.8695625066 , 4.1894096136 , 10.4155200806 ],

[ 20.1413730383 , 6.3917301893 , 10.4155200806 ],

[ 4.8580693006 , 10.8042286635 , 10.4165195312 ],

[ 17.6028426885 , 7.8792494536 , 12.4435199585 ],

[ 7.4003232717 , 7.8543542624 , 12.4455207672 ],

[ 15.0510619878 , 7.8713043928 , 12.4475196686 ],

[ 9.9517930746 , 7.8621233702 , 12.4485210266 ],

[ 12.5014823675 , 7.8676842451 , 12.4485210266 ],

[ 8.68472898 , 5.6544164419 , 12.4695209351 ],

[ 16.3181327581 , 10.0786579847 , 12.4715198364 ],

[ 16.315292716 , 5.6593593359 , 12.4725192871 ],

[ 4.850279212 , 7.8617705107 , 12.4725192871 ],

[ 20.1516631841 , 7.8707741499 , 12.4725192871 ],

[ 6.1308635473 , 5.6543272734 , 12.4735206451 ],

[ 8.6862453222 , 10.0728281736 , 12.4745200958 ],

[ 18.8722518682 , 10.0786579847 , 12.4745200958 ],

[ 11.2296222448 , 5.6594485045 , 12.4775203552 ],

[ 13.7753823995 , 5.6615666151 , 12.4795192566 ],

[ 13.7727721929 , 10.0747784376 , 12.4795192566 ],

[ 11.2267020941 , 10.0721281767 , 12.4815200653 ],

[ 12.5062822103 , 3.4577444792 , 12.4845203247 ],

[ 7.4079812765 , 3.4532414675 , 12.4855197754 ],

[ 17.5894016027 , 3.4532414675 , 12.4865211334 ],

[ 22.6909126043 , 3.4532414675 , 12.4865211334 ],

[ 1.0334143638 , 10.0746887922 , 12.4865211334 ],

[ 3.581941247 , 5.6576822996 , 12.4875205841 ],

[ 15.0485318899 , 3.4532414675 , 12.4895194855 ],

[ 20.1410716772 , 3.4532414675 , 12.4895194855 ],

[ 9.9574121237 , 3.453594327 , 12.4895194855 ],

[ 4.855898261 , 3.4532414675 , 12.4905208435 ],

[ 3.5851904154 , 10.0723885298 , 12.4915202942 ],

[ 21.4170516729 , 5.6589182615 , 12.4925197449 ],

[ 2.3069642782 , 7.8663605452 , 12.4925197449 ],

[ 18.8651832342 , 5.6610373259 , 12.5005210724 ],

[ 6.1369675398 , 10.0718582869 , 12.5005210724 ],

[ 19.5994724035 , 8.3293017149 , 15.2635196533 ],

[ 5.3906463384 , 7.4332584143 , 15.2665199127 ],

[ 7.266028285 , 5.6183093786 , 15.3015197601 ],

[ 17.7235816717 , 10.1437186003 , 15.311519989 ],

[ 18.5279124975 , 8.1502693892 , 15.3155196991 ],

[ 6.4621514082 , 7.6120256186 , 15.3175205078 ],

[ 9.9774373769 , 5.4150885344 , 15.3295196381 ],

[ 17.8968318701 , 6.3442362547 , 15.3355201569 ],

[ 12.4450124502 , 5.3792475462 , 15.3395198669 ],

[ 7.4641383886 , 6.6904705763 , 15.3395198669 ],

[ 7.0937441587 , 9.4175289869 , 15.3415206757 ],

[ 15.0124725103 , 10.3460587263 , 15.3415206757 ],

[ 17.5255721807 , 9.0713833571 , 15.3455203857 ],

[ 14.9114221334 , 5.3143614531 , 15.3505195465 ],

[ 12.5454124212 , 10.3817280531 , 15.3515209045 ],

[ 9.9966491461 , 6.5061415434 , 15.3605197754 ],

[ 10.0795120001 , 10.4467886686 , 15.3625205841 ],

[ 12.467642188 , 6.4707411528 , 15.3665202942 ],

[ 14.993522048 , 9.2549170256 , 15.3675197449 ],

[ 12.5226320028 , 9.2901400328 , 15.3735202637 ],

[ 14.9397023916 , 6.4045313597 , 15.3805202332 ],

[ 11.2498019933 , 7.1785701513 , 15.386520752 ],

[ 8.8035310507 , 7.2244762182 , 15.386520752 ],

[ 10.0510219335 , 9.3566149473 , 15.386520752 ],

[ 16.1864818334 , 8.5368469954 , 15.3895210114 ],

[ 13.7406724691 , 8.582311511 , 15.3895210114 ],

[ 13.7089723348 , 7.1293982267 , 15.3915199127 ],

[ 11.2813028097 , 8.6314829588 , 15.3945201721 ],

[ 16.1298621893 , 7.0992072821 , 15.4015201416 ],

[ 8.8606122732 , 8.6620281935 , 15.4035209503 ],

[ 9.97393 , 7.862119960267, 18.4203265991 ],

[ 9.97393 , 6.054769801567, 20.2276767578 ],

[ 8.1665798413 , 7.862119960267, 20.2276767578 ],

[ 11.7812801587 , 7.862119960267, 20.2276767578 ],

[ 9.97393 , 9.669470118967, 20.2276767578 ],

[ 9.97393 , 4.247419881267, 22.0350269165 ],

[ 8.1665798413 , 6.054769801567, 22.0350269165 ],

[ 11.7812801587 , 6.054769801567, 22.0350269165 ],

[ 9.97393 , 7.862119960267, 22.0350269165 ],

[ 8.1665798413 , 9.669470118967, 22.0350269165 ],

[ 11.7812801587 , 9.669470118967, 22.0350269165 ],

[ 9.97393 , 11.476820277667, 22.0350269165 ],

[ 8.1665798413 , 4.247419881267, 23.8423770752 ],

[ 11.7812801587 , 4.247419881267, 23.8423770752 ],

[ 9.97393 , 6.054769801567, 23.8423770752 ],

[ 8.1665798413 , 7.862119960267, 23.8423770752 ],

[ 11.7812801587 , 7.862119960267, 23.8423770752 ],

[ 9.97393 , 9.669470118967, 23.8423770752 ],

[ 8.1665798413 , 11.476820277667, 23.8423770752 ],

[ 11.7812801587 , 11.476820277667, 23.8423770752 ],

[ 9.97393 , 4.247419881267, 25.6497272339 ],

[ 8.1665798413 , 6.054769801567, 25.6497272339 ],

[ 11.7812801587 , 6.054769801567, 25.6497272339 ],

[ 9.97393 , 7.862119960267, 25.6497272339 ],

[ 8.1665798413 , 9.669470118967, 25.6497272339 ],

[ 11.7812801587 , 9.669470118967, 25.6497272339 ],

[ 9.97393 , 11.476820277667, 25.6497272339 ],

[ 8.1665798413 , 4.247419881267, 27.4570773926 ],

[ 11.7812801587 , 4.247419881267, 27.4570773926 ],

[ 9.97393 , 6.054769801567, 27.4570773926 ],

[ 8.1665798413 , 7.862119960267, 27.4570773926 ],

[ 11.7812801587 , 7.862119960267, 27.4570773926 ],

[ 9.97393 , 9.669470118967, 27.4570773926 ],

[ 8.1665798413 , 11.476820277667, 27.4570773926 ],

[ 11.7812801587 , 11.476820277667, 27.4570773926 ],

[ 9.97393 , 4.247419881267, 29.2644275513 ],

[ 8.1665798413 , 6.054769801567, 29.2644275513 ],

[ 11.7812801587 , 6.054769801567, 29.2644275513 ],

[ 9.97393 , 7.862119960267, 29.2644275513 ],

[ 8.1665798413 , 9.669470118967, 29.2644275513 ],

[ 11.7812801587 , 9.669470118967, 29.2644275513 ],

[ 9.97393 , 11.476820277667, 29.2644275513 ]]*Angstrom

# Set up configuration

central_region = BulkConfiguration(

bravais_lattice=central_region_lattice,

elements=central_region_elements,

cartesian_coordinates=central_region_coordinates

)

device_configuration = DeviceConfiguration(

central_region,

[left_electrode, right_electrode],

equivalent_electrode_lengths=[7.22940064, 7.2293930054]*Angstrom,

transverse_electrode_repetitions=[[1, 1], [1, 1]],

)

# -------------------------------------------------------------

# Calculator

# -------------------------------------------------------------

#----------------------------------------

# Basis Set

#----------------------------------------

basis_set = [

GGABasis.Hydrogen_DoubleZetaPolarized,

GGABasis.Carbon_DoubleZetaPolarized,

GGABasis.Copper_DoubleZetaPolarized,

GGABasis.Selenium_DoubleZetaPolarized,

]

#----------------------------------------

# Numerical Accuracy Settings

#----------------------------------------

device_k_point_sampling = MonkhorstPackGrid(

na=2,

nc=261,

)

device_numerical_accuracy_parameters = NumericalAccuracyParameters(

density_mesh_cutoff=100.0*Hartree,

k_point_sampling=device_k_point_sampling,

)

#----------------------------------------

# Contour Integral Settings

#----------------------------------------

equilibrium_contour = SemiCircleContour(

integral_lower_bound=1.84481605655*Hartree,

circle_points=30,

)

contour_parameters = ContourParameters(

equilibrium_contour=equilibrium_contour,

)

#----------------------------------------

# Device Calculator

#----------------------------------------

calculator = DeviceLCAOCalculator(

basis_set=basis_set,

numerical_accuracy_parameters=device_numerical_accuracy_parameters,

contour_parameters=contour_parameters,

)

device_configuration.setCalculator(calculator)

nlprint(device_configuration)

nlsave('phy-Cu-ADS-Cu-C1-012-012.hdf5', device_configuration)

# -------------------------------------------------------------

# IV Characteristics

# -------------------------------------------------------------

# Kpoint sampling

kpoint_grid = MonkhorstPackGrid(

na=2,

)

# Gate-source voltages

gate_source_voltages = numpy.linspace(0, 0, 1)*Volt

# Drain-source voltages

drain_source_voltages = numpy.linspace(-0.12, 0.12, 7)*Volt

# File name.

filename = 'phy-Cu-ADS-Cu-C1-012-012.hdf5'

iv_characteristics = IVCharacteristics(

configuration=device_configuration,

filename=filename,

object_id='ivcharacteristics',

gate_regions=[],

gate_source_voltages=gate_source_voltages,

drain_source_voltages=drain_source_voltages,

energies=numpy.linspace(-2, 2, 201)*eV,

kpoints=kpoint_grid,

self_energy_calculator=RecursionSelfEnergy(),

energy_zero_parameter=AverageFermiLevel,

infinitesimal=1e-06*eV,

log_filename_prefix='ivcharacteristics_',

number_of_processes_per_task=None,

enforce_zero_transmission_in_band_gap=True,

)

iv_characteristics.update()

**chem-Cu-ADS-Cu-*c*1.py**

# -*- coding: utf-8 -*-

# -------------------------------------------------------------

# Two-probe Configuration

# -------------------------------------------------------------

# -------------------------------------------------------------

# Left Electrode

# -------------------------------------------------------------

# Set up lattice

vector_a = [25.0, 0.0, 0.0]*Angstrom

vector_b = [0.0, 15.0, 0.0]*Angstrom

vector_c = [0.0, 0.0, 3.61470032]*Angstrom

left_electrode_lattice = UnitCell(vector_a, vector_b, vector_c)

# Define elements

left_electrode_elements = [Copper, Copper, Copper, Copper, Copper, Copper, Copper, Copper,

Copper, Copper, Copper, Copper, Copper, Copper, Copper]

# Define coordinates

left_electrode_coordinates = [[ 10.6926496004 , 3.88530015845, 0.9035754 ],

[ 14.3073499204 , 3.88530015845, 0.9035754 ],

[ 12.4999997604 , 5.69265007845, 0.9035754 ],

[ 10.6926496004 , 7.50000023845, 0.9035754 ],

[ 14.3073499204 , 7.50000023845, 0.9035754 ],

[ 12.4999997604 , 9.30735039845, 0.9035754 ],

[ 10.6926496004 , 11.11470055845, 0.9035754 ],

[ 14.3073499204 , 11.11470055845, 0.9035754 ],

[ 12.4999997604 , 3.88530015845, 2.71092556 ],

[ 10.6926496004 , 5.69265007845, 2.71092556 ],

[ 14.3073499204 , 5.69265007845, 2.71092556 ],

[ 12.4999997604 , 7.50000023845, 2.71092556 ],

[ 10.6926496004 , 9.30735039845, 2.71092556 ],

[ 14.3073499204 , 9.30735039845, 2.71092556 ],

[ 12.4999997604 , 11.11470055845, 2.71092556 ]]*Angstrom

# Set up configuration

left_electrode = BulkConfiguration(

bravais_lattice=left_electrode_lattice,

elements=left_electrode_elements,

cartesian_coordinates=left_electrode_coordinates

)

# -------------------------------------------------------------

# Right Electrode

# -------------------------------------------------------------

# Set up lattice

vector_a = [25.0, 0.0, 0.0]*Angstrom

vector_b = [0.0, 15.0, 0.0]*Angstrom

vector_c = [0.0, 0.0, 3.6146965027]*Angstrom

right_electrode_lattice = UnitCell(vector_a, vector_b, vector_c)

# Define elements

right_electrode_elements = [Copper, Copper, Copper, Copper, Copper, Copper, Copper, Copper,

Copper, Copper, Copper, Copper, Copper, Copper, Copper]

# Define coordinates

right_electrode_coordinates = [[ 8.1665798413 , 4.247419881267, 0.9037728546 ],

[ 11.7812801587 , 4.247419881267, 0.9037728546 ],

[ 9.97393 , 6.054769801567, 0.9037728546 ],

[ 8.1665798413 , 7.862119960267, 0.9037728546 ],

[ 11.7812801587 , 7.862119960267, 0.9037728546 ],

[ 9.97393 , 9.669470118967, 0.9037728546 ],

[ 8.1665798413 , 11.476820277667, 0.9037728546 ],

[ 11.7812801587 , 11.476820277667, 0.9037728546 ],

[ 9.97393 , 4.247419881267, 2.7111230133 ],

[ 8.1665798413 , 6.054769801567, 2.7111230133 ],

[ 11.7812801587 , 6.054769801567, 2.7111230133 ],

[ 9.97393 , 7.862119960267, 2.7111230133 ],

[ 8.1665798413 , 9.669470118967, 2.7111230133 ],

[ 11.7812801587 , 9.669470118967, 2.7111230133 ],

[ 9.97393 , 11.476820277667, 2.7111230133 ]]*Angstrom

# Set up configuration

right_electrode = BulkConfiguration(

bravais_lattice=right_electrode_lattice,

elements=right_electrode_elements,

cartesian_coordinates=right_electrode_coordinates

)

# -------------------------------------------------------------

# Central Region

# -------------------------------------------------------------

# Set up lattice

vector_a = [25.0, 0.0, 0.0]*Angstrom

vector_b = [0.0, 15.0, 0.0]*Angstrom

vector_c = [0.0, 0.0, 30.167997226]*Angstrom

central_region_lattice = UnitCell(vector_a, vector_b, vector_c)

# Define elements

central_region_elements = [Copper, Copper, Copper, Copper, Copper, Copper, Copper, Copper,

Copper, Copper, Copper, Copper, Copper, Copper, Copper, Copper,

Copper, Copper, Copper, Copper, Copper, Copper, Copper, Copper,

Copper, Copper, Copper, Copper, Copper, Copper, Copper, Copper,

Copper, Copper, Copper, Copper, Copper, Copper, Copper, Copper,

Copper, Copper, Copper, Copper, Copper, Copper, Copper, Copper,

Copper, Copper, Copper, Copper, Copper, Copper, Copper, Copper,

Copper, Copper, Copper, Copper, Copper, Copper, Copper, Copper,

Copper, Copper, Copper, Copper, Copper, Copper, Copper, Copper,

Copper, Copper, Copper, Copper, Copper, Copper, Copper, Copper,

Copper, Copper, Copper, Copper, Copper, Copper, Copper, Copper,

Copper, Copper, Copper, Copper, Copper, Copper, Copper, Copper,

Copper, Copper, Copper, Copper, Copper, Copper, Copper, Copper,

Copper, Copper, Copper, Copper, Copper, Copper, Copper, Copper,

Copper, Copper, Copper, Copper, Copper, Copper, Copper, Copper,

Copper, Copper, Copper, Copper, Copper, Copper, Carbon, Carbon,

Carbon, Carbon, Carbon, Carbon, Carbon, Hydrogen, Carbon, Hydrogen,

Carbon, Hydrogen, Hydrogen, Carbon, Hydrogen, Carbon, Hydrogen,

Carbon, Selenium, Selenium, Carbon, Carbon, Carbon, Carbon, Carbon,

Carbon, Hydrogen, Hydrogen, Hydrogen, Hydrogen, Copper, Copper,

Copper, Copper, Copper, Copper, Copper, Copper, Copper, Copper,

Copper, Copper, Copper, Copper, Copper, Copper, Copper, Copper,

Copper, Copper, Copper, Copper, Copper, Copper, Copper, Copper,

Copper, Copper, Copper, Copper, Copper, Copper, Copper, Copper,

Copper, Copper, Copper, Copper, Copper, Copper, Copper, Copper]

# Define coordinates

central_region_coordinates = [[ 10.6926496004 , 3.88530015845 , 0.9035754 ],

[ 14.3073499204 , 3.88530015845 , 0.9035754 ],

[ 12.4999997604 , 5.69265007845 , 0.9035754 ],

[ 10.6926496004 , 7.50000023845 , 0.9035754 ],

[ 14.3073499204 , 7.50000023845 , 0.9035754 ],

[ 12.4999997604 , 9.30735039845 , 0.9035754 ],

[ 10.6926496004 , 11.11470055845 , 0.9035754 ],

[ 14.3073499204 , 11.11470055845 , 0.9035754 ],

[ 12.4999997604 , 3.88530015845 , 2.71092556 ],

[ 10.6926496004 , 5.69265007845 , 2.71092556 ],

[ 14.3073499204 , 5.69265007845 , 2.71092556 ],

[ 12.4999997604 , 7.50000023845 , 2.71092556 ],

[ 10.6926496004 , 9.30735039845 , 2.71092556 ],

[ 14.3073499204 , 9.30735039845 , 2.71092556 ],

[ 12.4999997604 , 11.11470055845 , 2.71092556 ],

[ 10.6926496004 , 3.88530015845 , 4.51827571 ],

[ 14.3073499204 , 3.88530015845 , 4.51827571 ],

[ 12.4999997604 , 5.69265007845 , 4.51827571 ],

[ 10.6926496004 , 7.50000023845 , 4.51827571 ],

[ 14.3073499204 , 7.50000023845 , 4.51827571 ],

[ 12.4999997604 , 9.30735039845 , 4.51827571 ],

[ 10.6926496004 , 11.11470055845 , 4.51827571 ],

[ 14.3073499204 , 11.11470055845 , 4.51827571 ],

[ 12.4999997604 , 3.88530015845 , 6.32562587 ],

[ 10.6926496004 , 5.69265007845 , 6.32562587 ],

[ 14.3073499204 , 5.69265007845 , 6.32562587 ],

[ 12.4999997604 , 7.50000023845 , 6.32562587 ],

[ 10.6926496004 , 9.30735039845 , 6.32562587 ],

[ 14.3073499204 , 9.30735039845 , 6.32562587 ],

[ 12.4999997604 , 11.11470055845 , 6.32562587 ],

[ 3.5799309611 , 11.55716919905 , 8.3275264587 ],

[ 15.0424889922 , 9.34946560865 , 8.3295253601 ],

[ 8.6729840636 , 11.56228852275 , 8.3295253601 ],

[ 11.2219085097 , 11.56317830085 , 8.3295253601 ],

[ 12.4971389175 , 9.34840607645 , 8.3305267181 ],

[ 6.1268658042 , 11.56008839615 , 8.3305267181 ],

[ 7.4030150771 , 9.34725880625 , 8.3315261688 ],

[ 2.3047119975 , 9.34911274915 , 8.3315261688 ],

[ 18.8709697127 , 11.55831837655 , 8.3315261688 ],

[ 13.7716493011 , 11.56228852275 , 8.3315261688 ],

[ 9.9510316253 , 4.93961262705 , 8.3325256195 ],

[ 4.8561820388 , 9.34734654425 , 8.3325256195 ],

[ 17.592489183 , 9.34955334665 , 8.3325256195 ],

[ 20.1437987685 , 9.35052514075 , 8.3325256195 ],

[ 16.3206691146 , 11.55911850935 , 8.3325256195 ],

[ 1.0331498981 , 11.55964875225 , 8.3325256195 ],

[ 9.9480122924 , 9.34611058235 , 8.3335269775 ],

[ 22.6923789382 , 4.93696475035 , 8.3345264282 ],

[ 4.8549208045 , 4.93731760985 , 8.3345264282 ],

[ 7.4022120833 , 4.93996596335 , 8.3345264282 ],

[ 3.5815238357 , 7.14255261425 , 8.3345264282 ],

[ 20.1435584426 , 4.93908381465 , 8.3355258789 ],

[ 17.5950984359 , 4.94058394435 , 8.3355258789 ],

[ 6.1295790076 , 7.14211153985 , 8.3355258789 ],

[ 18.8674086928 , 7.14202284815 , 8.3365253296 ],

[ 12.4989890456 , 4.94323277475 , 8.3375266876 ],

[ 15.0471991897 , 4.94393897055 , 8.3375266876 ],

[ 21.4148597121 , 7.14193463325 , 8.3375266876 ],

[ 8.6792153716 , 7.14105153085 , 8.339525589 ],

[ 11.2287492156 , 7.14193463325 , 8.339525589 ],

[ 16.3195590377 , 7.14069867135 , 8.3435252991 ],

[ 13.7724189162 , 7.14131665235 , 8.3445266571 ],

[ 9.9445418716 , 10.81861901285 , 10.3835281219 ],

[ 12.4942788482 , 10.82444882395 , 10.3865283813 ],

[ 7.3989838958 , 10.81438851355 , 10.3915275421 ],

[ 8.6754521728 , 4.19232296945 , 10.3925289001 ],

[ 15.0467690826 , 10.82656884195 , 10.3935283508 ],

[ 4.85342592 , 10.81367897995 , 10.3955272522 ],

[ 18.8749980331 , 8.61868405345 , 10.4005283203 ],

[ 17.6007880569 , 10.82532906535 , 10.4005283203 ],

[ 2.3080720305 , 10.81685853005 , 10.401527771 ],

[ 11.2252387404 , 4.20123887065 , 10.4035285797 ],

[ 16.3124694228 , 8.61912465095 , 10.4035285797 ],

[ 20.1508292556 , 10.82391858105 , 10.4035285797 ],

[ 3.5782069564 , 8.61162114145 , 10.4045280304 ],

[ 13.7743186355 , 4.20750689505 , 10.4065288391 ],

[ 22.6971186996 , 6.40797495845 , 10.4075282898 ],

[ 6.1288227439 , 4.20088553435 , 10.4085277405 ],

[ 23.9680690169 , 4.20097374915 , 10.4085277405 ],

[ 16.3220691085 , 4.20865464215 , 10.4085277405 ],

[ 21.4198493362 , 8.61426949505 , 10.4085277405 ],

[ 21.420368135 , 4.20397591595 , 10.4095290985 ],

[ 4.8575667739 , 6.40488457685 , 10.4125274506 ],

[ 6.1290659308 , 8.60738396645 , 10.4125274506 ],

[ 11.2245187163 , 8.61117959025 , 10.4125274506 ],

[ 13.7693585753 , 8.61524033545 , 10.4135288086 ],

[ 18.8718585372 , 4.20768380165 , 10.4145282593 ],

[ 8.6706475616 , 8.60508751875 , 10.4185279694 ],

[ 9.9620370269 , 6.40717959405 , 10.4205287781 ],

[ 7.4011368156 , 6.41044688225 , 10.4205287781 ],

[ 20.141158998 , 6.40656256675 , 10.4235290375 ],

[ 17.5994796157 , 6.40444350245 , 10.4285281982 ],

[ 15.0432690978 , 6.41159367565 , 10.4465278473 ],

[ 12.5025491118 , 6.41097664835 , 10.448528656 ],

[ 8.6872720122 , 5.64647078515 , 12.4315284576 ],

[ 17.5970286727 , 7.91191363335 , 12.434528717 ],

[ 12.503269136 , 3.43682169915 , 12.4465278473 ],

[ 13.7715491653 , 10.12773919105 , 12.447527298 ],

[ 15.0574387908 , 3.44732785225 , 12.448528656 ],

[ 11.2188491225 , 10.11361908915 , 12.4495281067 ],

[ 9.947875917 , 3.44538474085 , 12.4565280762 ],

[ 16.3248996139 , 10.11529850965 , 12.4595283356 ],

[ 8.6783398986 , 10.09710907935 , 12.4635280457 ],

[ 17.5960196853 , 3.46613073355 , 12.4665283051 ],

[ 7.4027771354 , 3.45624375345 , 12.4695285645 ],

[ 18.8733691573 , 10.10107827185 , 12.4715274658 ],

[ 6.1242699027 , 10.09066891675 , 12.4725288239 ],

[ 4.8411001563 , 7.87766051295 , 12.4795287933 ],

[ 9.9422063232 , 7.89178586005 , 12.4795287933 ],

[ 20.1558493972 , 3.46966171265 , 12.480528244 ],

[ 20.1448783279 , 7.89063763625 , 12.4815276947 ],

[ 3.5783550143 , 10.08351826675 , 12.4835285034 ],

[ 21.4328498244 , 5.67675185205 , 12.4845279541 ],

[ 1.0319309831 , 10.08924889565 , 12.4845279541 ],

[ 4.8559951186 , 3.46613073355 , 12.4865287628 ],

[ 2.3037478328 , 7.88110375405 , 12.4875282135 ],

[ 3.5876440406 , 5.67321991925 , 12.4885276642 ],

[ 22.6995696425 , 3.47213363655 , 12.4895290222 ],

[ 6.1311640143 , 5.66333270075 , 12.4895290222 ],

[ 11.2323693633 , 5.64161562925 , 12.4905284729 ],

[ 15.0495786071 , 7.92506670955 , 12.4905284729 ],

[ 16.3312396407 , 5.66633391385 , 12.4955276337 ],

[ 12.4942387939 , 7.92612671855 , 12.4975284424 ],

[ 7.3850778937 , 7.88640093805 , 12.5115283813 ],

[ 13.782109201 , 5.64143872265 , 12.5155280914 ],

[ 18.8853091598 , 5.66854071625 , 12.5215286102 ],

[ 12.9113587737 , 8.13729310035 , 14.6945289459 ],

[ 13.0834893584 , 5.30659270285 , 14.7055286255 ],

[ 14.2906188369 , 6.06438851355 , 14.7895282593 ],

[ 14.2116689086 , 7.51756691935 , 14.8045276489 ],

[ 11.7043790221 , 7.37817263605 , 14.8075279083 ],

[ 11.7805384994 , 5.92631888395 , 14.8165286865 ],

[ 15.5819491744 , 5.43795371055 , 14.8685287323 ],

[ 13.1451587081 , 4.23010659225 , 14.8795284119 ],

[ 10.417589128 , 8.00381302835 , 14.8825286713 ],

[ 12.8526391387 , 9.21148419385 , 14.8825286713 ],

[ 15.3983086944 , 8.28154206275 , 14.9235290375 ],

[ 15.6352185607 , 4.35131478315 , 14.9445289459 ],

[ 10.3650893569 , 9.09159970285 , 14.948528656 ],

[ 10.596439302 , 5.16322684295 , 14.9615272369 ],

[ 15.3206786513 , 9.36659169205 , 15.012527832 ],

[ 16.7231788039 , 6.23574090005 , 15.0285285797 ],

[ 10.6747292876 , 4.07702851295 , 15.0385288086 ],

[ 9.2784489989 , 7.20770382885 , 15.0655273285 ],

[ 18.5574797988 , 5.63216996195 , 15.0765289154 ],

[ 7.4520000815 , 7.82098460205 , 15.0765289154 ],

[ 16.6632880569 , 7.65307688715 , 15.0855277863 ],

[ 9.33115381 , 5.79116177565 , 15.1165279236 ],

[ 17.938159883 , 8.30096364025 , 15.2335285034 ],

[ 8.0496606231 , 5.14910197265 , 15.2535289612 ],

[ 6.9623531699 , 5.97760987285 , 15.2735275116 ],

[ 19.0282687545 , 7.47607493405 , 15.2755283203 ],

[ 18.033359468 , 9.38680768015 , 15.2845290985 ],

[ 7.9491547942 , 4.06396365165 , 15.3125289764 ],

[ 20.0781096816 , 7.74285674095 , 15.3655284729 ],

[ 5.9118980765 , 5.71859574325 , 15.3735278931 ],

[ 9.97393 , 7.862119960267, 18.4203265991 ],

[ 9.97393 , 6.054769801567, 20.2276767578 ],

[ 8.1665798413 , 7.862119960267, 20.2276767578 ],

[ 11.7812801587 , 7.862119960267, 20.2276767578 ],

[ 9.97393 , 9.669470118967, 20.2276767578 ],

[ 9.97393 , 4.247419881267, 22.0350269165 ],

[ 8.1665798413 , 6.054769801567, 22.0350269165 ],

[ 11.7812801587 , 6.054769801567, 22.0350269165 ],

[ 9.97393 , 7.862119960267, 22.0350269165 ],

[ 8.1665798413 , 9.669470118967, 22.0350269165 ],

[ 11.7812801587 , 9.669470118967, 22.0350269165 ],

[ 9.97393 , 11.476820277667, 22.0350269165 ],

[ 8.1665798413 , 4.247419881267, 23.8423770752 ],

[ 11.7812801587 , 4.247419881267, 23.8423770752 ],

[ 9.97393 , 6.054769801567, 23.8423770752 ],

[ 8.1665798413 , 7.862119960267, 23.8423770752 ],

[ 11.7812801587 , 7.862119960267, 23.8423770752 ],

[ 9.97393 , 9.669470118967, 23.8423770752 ],

[ 8.1665798413 , 11.476820277667, 23.8423770752 ],

[ 11.7812801587 , 11.476820277667, 23.8423770752 ],

[ 9.97393 , 4.247419881267, 25.6497272339 ],

[ 8.1665798413 , 6.054769801567, 25.6497272339 ],

[ 11.7812801587 , 6.054769801567, 25.6497272339 ],

[ 9.97393 , 7.862119960267, 25.6497272339 ],

[ 8.1665798413 , 9.669470118967, 25.6497272339 ],

[ 11.7812801587 , 9.669470118967, 25.6497272339 ],

[ 9.97393 , 11.476820277667, 25.6497272339 ],

[ 8.1665798413 , 4.247419881267, 27.4570773926 ],

[ 11.7812801587 , 4.247419881267, 27.4570773926 ],

[ 9.97393 , 6.054769801567, 27.4570773926 ],

[ 8.1665798413 , 7.862119960267, 27.4570773926 ],

[ 11.7812801587 , 7.862119960267, 27.4570773926 ],

[ 9.97393 , 9.669470118967, 27.4570773926 ],

[ 8.1665798413 , 11.476820277667, 27.4570773926 ],

[ 11.7812801587 , 11.476820277667, 27.4570773926 ],

[ 9.97393 , 4.247419881267, 29.2644275513 ],

[ 8.1665798413 , 6.054769801567, 29.2644275513 ],

[ 11.7812801587 , 6.054769801567, 29.2644275513 ],

[ 9.97393 , 7.862119960267, 29.2644275513 ],

[ 8.1665798413 , 9.669470118967, 29.2644275513 ],

[ 11.7812801587 , 9.669470118967, 29.2644275513 ],

[ 9.97393 , 11.476820277667, 29.2644275513 ]]*Angstrom

# Set up configuration

central_region = BulkConfiguration(

bravais_lattice=central_region_lattice,

elements=central_region_elements,

cartesian_coordinates=central_region_coordinates

)

device_configuration = DeviceConfiguration(

central_region,

[left_electrode, right_electrode],

equivalent_electrode_lengths=[7.22940064, 7.2293930054]*Angstrom,

transverse_electrode_repetitions=[[1, 1], [1, 1]],

)

# -------------------------------------------------------------

# Calculator

# -------------------------------------------------------------

#----------------------------------------

# Basis Set

#----------------------------------------

basis_set = [

GGABasis.Hydrogen_DoubleZetaPolarized,

GGABasis.Carbon_DoubleZetaPolarized,

GGABasis.Copper_DoubleZetaPolarized,

GGABasis.Selenium_DoubleZetaPolarized,

]

#----------------------------------------

# Numerical Accuracy Settings

#----------------------------------------

device_k_point_sampling = MonkhorstPackGrid(

na=2,

nc=261,

)

device_numerical_accuracy_parameters = NumericalAccuracyParameters(

density_mesh_cutoff=100.0*Hartree,

k_point_sampling=device_k_point_sampling,

)

#----------------------------------------

# Contour Integral Settings

#----------------------------------------

equilibrium_contour = SemiCircleContour(

integral_lower_bound=1.84481605655*Hartree,

circle_points=30,

)

contour_parameters = ContourParameters(

equilibrium_contour=equilibrium_contour,

)

#----------------------------------------

# Device Calculator

#----------------------------------------

calculator = DeviceLCAOCalculator(

basis_set=basis_set,

numerical_accuracy_parameters=device_numerical_accuracy_parameters,

contour_parameters=contour_parameters,

)

device_configuration.setCalculator(calculator)

nlprint(device_configuration)

nlsave('chem-Cu-ADS-Cu-C1-012-012.hdf5', device_configuration)

# -------------------------------------------------------------

# IV Characteristics

# -------------------------------------------------------------

# Kpoint sampling

kpoint_grid = MonkhorstPackGrid(

na=2,

)

# Gate-source voltages

gate_source_voltages = numpy.linspace(0, 0, 1)*Volt

# Drain-source voltages

drain_source_voltages = numpy.linspace(-0.12, 0.12, 7)*Volt

# File name.

filename = 'chem-Cu-ADS-Cu-C1-012-012.hdf5'

iv_characteristics = IVCharacteristics(

configuration=device_configuration,

filename=filename,

object_id='ivcharacteristics',

gate_regions=[],

gate_source_voltages=gate_source_voltages,

drain_source_voltages=drain_source_voltages,

energies=numpy.linspace(-2, 2, 201)*eV,

kpoints=kpoint_grid,

self_energy_calculator=RecursionSelfEnergy(),

energy_zero_parameter=AverageFermiLevel,

infinitesimal=1e-06*eV,

log_filename_prefix='ivcharacteristics_',

number_of_processes_per_task=None,

enforce_zero_transmission_in_band_gap=True,

)

iv_characteristics.update()

**phys-Cu-ADS-Cu-*c*2.py**

# -*- coding: utf-8 -*-

# -------------------------------------------------------------

# Two-probe Configuration

# -------------------------------------------------------------

# -------------------------------------------------------------

# Left Electrode

# -------------------------------------------------------------

# Set up lattice

vector_a = [25.0, 0.0, 0.0]*Angstrom

vector_b = [0.0, 15.0, 0.0]*Angstrom

vector_c = [0.0, 0.0, 3.61470032]*Angstrom

left_electrode_lattice = UnitCell(vector_a, vector_b, vector_c)

# Define elements

left_electrode_elements = [Copper, Copper, Copper, Copper, Copper, Copper, Copper, Copper,

Copper, Copper, Copper, Copper, Copper, Copper, Copper]

# Define coordinates

left_electrode_coordinates = [[ 10.6926501976, 3.8852998008, 0.9035754 ],

[ 14.3073505176, 3.8852998008, 0.9035754 ],

[ 12.5000003576, 5.6926497208, 0.9035754 ],

[ 10.6926501976, 7.4999998808, 0.9035754 ],

[ 14.3073505176, 7.4999998808, 0.9035754 ],

[ 12.5000003576, 9.3073500408, 0.9035754 ],

[ 10.6926501976, 11.1147002008, 0.9035754 ],

[ 14.3073505176, 11.1147002008, 0.9035754 ],

[ 12.5000003576, 3.8852998008, 2.71092556 ],

[ 10.6926501976, 5.6926497208, 2.71092556 ],

[ 14.3073505176, 5.6926497208, 2.71092556 ],

[ 12.5000003576, 7.4999998808, 2.71092556 ],

[ 10.6926501976, 9.3073500408, 2.71092556 ],

[ 14.3073505176, 9.3073500408, 2.71092556 ],

[ 12.5000003576, 11.1147002008, 2.71092556 ]]*Angstrom

# Set up configuration

left_electrode = BulkConfiguration(

bravais_lattice=left_electrode_lattice,

elements=left_electrode_elements,

cartesian_coordinates=left_electrode_coordinates

)

# -------------------------------------------------------------

# Right Electrode

# -------------------------------------------------------------

# Set up lattice

vector_a = [25.0, 0.0, 0.0]*Angstrom

vector_b = [0.0, 15.0, 0.0]*Angstrom

vector_c = [0.0, 0.0, 3.6146965027]*Angstrom

right_electrode_lattice = UnitCell(vector_a, vector_b, vector_c)

# Define elements

right_electrode_elements = [Copper, Copper, Copper, Copper, Copper, Copper, Copper, Copper,

Copper, Copper, Copper, Copper, Copper, Copper, Copper]

# Define coordinates

right_electrode_coordinates = [[ 5.9823398413 , 4.422719881267, 0.9037728546 ],

[ 9.5970401587 , 4.422719881267, 0.9037728546 ],

[ 7.78969 , 6.230069801567, 0.9037728546 ],

[ 5.9823398413 , 8.037419960267, 0.9037728546 ],

[ 9.5970401587 , 8.037419960267, 0.9037728546 ],

[ 7.78969 , 9.844770118967, 0.9037728546 ],

[ 5.9823398413 , 11.652120277667, 0.9037728546 ],

[ 9.5970401587 , 11.652120277667, 0.9037728546 ],

[ 7.78969 , 4.422719881267, 2.7111230133 ],

[ 5.9823398413 , 6.230069801567, 2.7111230133 ],

[ 9.5970401587 , 6.230069801567, 2.7111230133 ],

[ 7.78969 , 8.037419960267, 2.7111230133 ],

[ 5.9823398413 , 9.844770118967, 2.7111230133 ],

[ 9.5970401587 , 9.844770118967, 2.7111230133 ],

[ 7.78969 , 11.652120277667, 2.7111230133 ]]*Angstrom

# Set up configuration

right_electrode = BulkConfiguration(

bravais_lattice=right_electrode_lattice,

elements=right_electrode_elements,

cartesian_coordinates=right_electrode_coordinates

)

# -------------------------------------------------------------

# Central Region

# -------------------------------------------------------------

# Set up lattice

vector_a = [25.0, 0.0, 0.0]*Angstrom

vector_b = [0.0, 15.0, 0.0]*Angstrom

vector_c = [0.0, 0.0, 30.167997226]*Angstrom

central_region_lattice = UnitCell(vector_a, vector_b, vector_c)

# Define elements

central_region_elements = [Copper, Copper, Copper, Copper, Copper, Copper, Copper, Copper,

Copper, Copper, Copper, Copper, Copper, Copper, Copper, Copper,

Copper, Copper, Copper, Copper, Copper, Copper, Copper, Copper,

Copper, Copper, Copper, Copper, Copper, Copper, Copper, Copper,

Copper, Copper, Copper, Copper, Copper, Copper, Copper, Copper,

Copper, Copper, Copper, Copper, Copper, Copper, Copper, Copper,

Copper, Copper, Copper, Copper, Copper, Copper, Copper, Copper,

Copper, Copper, Copper, Copper, Copper, Copper, Copper, Copper,

Copper, Copper, Copper, Copper, Copper, Copper, Copper, Copper,

Copper, Copper, Copper, Copper, Copper, Copper, Copper, Copper,

Copper, Copper, Copper, Copper, Copper, Copper, Copper, Copper,

Copper, Copper, Copper, Copper, Copper, Copper, Copper, Copper,

Copper, Copper, Copper, Copper, Copper, Copper, Copper, Copper,

Copper, Copper, Copper, Copper, Copper, Copper, Copper, Copper,

Copper, Copper, Copper, Copper, Copper, Copper, Copper, Copper,

Copper, Copper, Copper, Copper, Copper, Copper, Hydrogen, Hydrogen,

Hydrogen, Hydrogen, Carbon, Carbon, Hydrogen, Selenium, Hydrogen,

Carbon, Selenium, Hydrogen, Carbon, Hydrogen, Hydrogen, Carbon,

Hydrogen, Carbon, Carbon, Carbon, Carbon, Carbon, Carbon, Carbon,

Carbon, Carbon, Carbon, Carbon, Carbon, Carbon, Copper, Copper,

Copper, Copper, Copper, Copper, Copper, Copper, Copper, Copper,

Copper, Copper, Copper, Copper, Copper, Copper, Copper, Copper,

Copper, Copper, Copper, Copper, Copper, Copper, Copper, Copper,

Copper, Copper, Copper, Copper, Copper, Copper, Copper, Copper,

Copper, Copper, Copper, Copper, Copper, Copper, Copper, Copper]

# Define coordinates

central_region_coordinates = [[ 10.6926501976 , 3.8852998008 , 0.9035754 ],

[ 14.3073505176 , 3.8852998008 , 0.9035754 ],

[ 12.5000003576 , 5.6926497208 , 0.9035754 ],

[ 10.6926501976 , 7.4999998808 , 0.9035754 ],

[ 14.3073505176 , 7.4999998808 , 0.9035754 ],

[ 12.5000003576 , 9.3073500408 , 0.9035754 ],

[ 10.6926501976 , 11.1147002008 , 0.9035754 ],

[ 14.3073505176 , 11.1147002008 , 0.9035754 ],

[ 12.5000003576 , 3.8852998008 , 2.71092556 ],

[ 10.6926501976 , 5.6926497208 , 2.71092556 ],

[ 14.3073505176 , 5.6926497208 , 2.71092556 ],

[ 12.5000003576 , 7.4999998808 , 2.71092556 ],

[ 10.6926501976 , 9.3073500408 , 2.71092556 ],

[ 14.3073505176 , 9.3073500408 , 2.71092556 ],

[ 12.5000003576 , 11.1147002008 , 2.71092556 ],

[ 10.6926501976 , 3.8852998008 , 4.51827571 ],

[ 14.3073505176 , 3.8852998008 , 4.51827571 ],

[ 12.5000003576 , 5.6926497208 , 4.51827571 ],

[ 10.6926501976 , 7.4999998808 , 4.51827571 ],

[ 14.3073505176 , 7.4999998808 , 4.51827571 ],

[ 12.5000003576 , 9.3073500408 , 4.51827571 ],

[ 10.6926501976 , 11.1147002008 , 4.51827571 ],

[ 14.3073505176 , 11.1147002008 , 4.51827571 ],

[ 12.5000003576 , 3.8852998008 , 6.32562587 ],

[ 10.6926501976 , 5.6926497208 , 6.32562587 ],

[ 14.3073505176 , 5.6926497208 , 6.32562587 ],

[ 12.5000003576 , 7.4999998808 , 6.32562587 ],

[ 10.6926501976 , 9.3073500408 , 6.32562587 ],

[ 14.3073505176 , 9.3073500408 , 6.32562587 ],

[ 12.5000003576 , 11.1147002008 , 6.32562587 ],

[ 17.5967715978 , 9.3386067152 , 8.3295234528 ],

[ 12.4982122183 , 9.338783145 , 8.3295234528 ],

[ 15.0474427938 , 9.338783145 , 8.3295234528 ],

[ 7.4022172689 , 4.92195642 , 8.3305248108 ],

[ 8.6758559942 , 7.1302813292 , 8.3305248108 ],

[ 16.3218616247 , 7.1303704977 , 8.3305248108 ],

[ 11.2250322103 , 7.1307233572 , 8.3305248108 ],

[ 13.7725824117 , 7.1308115721 , 8.3305248108 ],

[ 7.4001153707 , 9.337459445 , 8.3305248108 ],

[ 9.9483741522 , 9.3377236128 , 8.3305248108 ],

[ 9.9506295919 , 4.9216035605 , 8.3315242615 ],

[ 18.8701728582 , 7.1298402548 , 8.3315242615 ],

[ 6.1271384954 , 7.1308115721 , 8.3315242615 ],

[ 2.3052273988 , 9.3372820616 , 8.3315242615 ],

[ 20.1456416845 , 9.3378123045 , 8.3315242615 ],

[ 12.4977124929 , 4.9221333265 , 8.3325237122 ],

[ 15.0472024679 , 4.923104167 , 8.3325237122 ],

[ 17.5956119299 , 4.9234575033 , 8.3325237122 ],

[ 1.0317283869 , 11.5441082716 , 8.3325237122 ],

[ 4.8536013365 , 4.9226626158 , 8.3335250702 ],

[ 4.8526204824 , 9.3372820616 , 8.3335250702 ],

[ 18.8703616857 , 11.5448979139 , 8.3335250702 ],

[ 16.3215926885 , 11.5455187559 , 8.3335250702 ],

[ 22.6925929784 , 4.9235452414 , 8.3345245209 ],

[ 3.5791333914 , 7.1301053763 , 8.3345245209 ],

[ 8.6743663549 , 11.5436686277 , 8.3345245209 ],

[ 11.2236922979 , 11.5448979139 , 8.3345245209 ],

[ 20.1432632208 , 4.9233692885 , 8.3355239716 ],

[ 3.5811084509 , 11.5424288511 , 8.3355239716 ],

[ 6.1270755529 , 11.5431383848 , 8.3355239716 ],

[ 13.7718518972 , 11.5467585325 , 8.3355239716 ],

[ 21.4163917303 , 7.1290453673 , 8.3365234222 ],

[ 16.3254722357 , 8.6050871611 , 10.3975204315 ],

[ 7.4034365415 , 6.3877586126 , 10.3985198822 ],

[ 18.8768924474 , 8.6034106016 , 10.3985198822 ],

[ 13.7747119665 , 8.6052645445 , 10.3985198822 ],

[ 9.9537853002 , 6.3889945746 , 10.3995193329 ],

[ 11.2250322103 , 8.6035870314 , 10.3995193329 ],

[ 8.6741193533 , 8.6019095183 , 10.4005206909 ],

[ 15.0479120016 , 6.3922604323 , 10.4025195923 ],

[ 12.5008720159 , 6.3902305365 , 10.4035209503 ],

[ 4.8547695875 , 6.3913773298 , 10.4055198517 ],

[ 17.5979522466 , 6.3919075728 , 10.4055198517 ],

[ 6.124993205 , 8.6024397612 , 10.4055198517 ],

[ 8.6783117056 , 4.1820815802 , 10.4065193024 ],

[ 21.4235728979 , 8.6018217802 , 10.4065193024 ],

[ 17.5978416204 , 10.8099688292 , 10.4065193024 ],

[ 15.0470327139 , 10.8105887175 , 10.4065193024 ],

[ 6.1300524473 , 4.1825236082 , 10.4075206604 ],

[ 13.77498281 , 4.1855243445 , 10.4075206604 ],

[ 9.9520400762 , 10.808118701 , 10.4075206604 ],

[ 20.1480315923 , 10.8086479902 , 10.4075206604 ],

[ 16.3233932256 , 4.1862305403 , 10.4085201111 ],

[ 3.5769883394 , 8.6006735563 , 10.4085201111 ],

[ 2.3083823919 , 10.8060883284 , 10.4085201111 ],

[ 12.4992822408 , 10.8076781035 , 10.4085201111 ],

[ 11.226362586 , 4.1837595701 , 10.4095195618 ],

[ 23.9682716131 , 4.1861423254 , 10.4105209198 ],

[ 21.4196132421 , 4.1876434088 , 10.4105209198 ],

[ 22.6926330328 , 6.3927901983 , 10.4115203705 ],

[ 7.401640296 , 10.8059080839 , 10.4115203705 ],

[ 18.8695625066 , 4.1894096136 , 10.4155200806 ],

[ 20.1413730383 , 6.3917301893 , 10.4155200806 ],

[ 4.8580693006 , 10.8042286635 , 10.4165195312 ],

[ 17.6028426885 , 7.8792494536 , 12.4435199585 ],

[ 7.4003232717 , 7.8543542624 , 12.4455207672 ],

[ 15.0510619878 , 7.8713043928 , 12.4475196686 ],

[ 9.9517930746 , 7.8621233702 , 12.4485210266 ],

[ 12.5014823675 , 7.8676842451 , 12.4485210266 ],

[ 8.68472898 , 5.6544164419 , 12.4695209351 ],

[ 16.3181327581 , 10.0786579847 , 12.4715198364 ],

[ 16.315292716 , 5.6593593359 , 12.4725192871 ],

[ 4.850279212 , 7.8617705107 , 12.4725192871 ],

[ 20.1516631841 , 7.8707741499 , 12.4725192871 ],

[ 6.1308635473 , 5.6543272734 , 12.4735206451 ],

[ 8.6862453222 , 10.0728281736 , 12.4745200958 ],

[ 18.8722518682 , 10.0786579847 , 12.4745200958 ],

[ 11.2296222448 , 5.6594485045 , 12.4775203552 ],

[ 13.7753823995 , 5.6615666151 , 12.4795192566 ],

[ 13.7727721929 , 10.0747784376 , 12.4795192566 ],

[ 11.2267020941 , 10.0721281767 , 12.4815200653 ],

[ 12.5062822103 , 3.4577444792 , 12.4845203247 ],

[ 7.4079812765 , 3.4532414675 , 12.4855197754 ],

[ 17.5894016027 , 3.4532414675 , 12.4865211334 ],

[ 22.6909126043 , 3.4532414675 , 12.4865211334 ],

[ 1.0334143638 , 10.0746887922 , 12.4865211334 ],

[ 3.581941247 , 5.6576822996 , 12.4875205841 ],

[ 15.0485318899 , 3.4532414675 , 12.4895194855 ],

[ 20.1410716772 , 3.4532414675 , 12.4895194855 ],

[ 9.9574121237 , 3.453594327 , 12.4895194855 ],

[ 4.855898261 , 3.4532414675 , 12.4905208435 ],

[ 3.5851904154 , 10.0723885298 , 12.4915202942 ],

[ 21.4170516729 , 5.6589182615 , 12.4925197449 ],

[ 2.3069642782 , 7.8663605452 , 12.4925197449 ],

[ 18.8651832342 , 5.6610373259 , 12.5005210724 ],

[ 6.1369675398 , 10.0718582869 , 12.5005210724 ],

[ 19.5994724035 , 8.3293017149 , 15.2635196533 ],

[ 5.3906463384 , 7.4332584143 , 15.2665199127 ],

[ 7.266028285 , 5.6183093786 , 15.3015197601 ],

[ 17.7235816717 , 10.1437186003 , 15.311519989 ],

[ 18.5279124975 , 8.1502693892 , 15.3155196991 ],

[ 6.4621514082 , 7.6120256186 , 15.3175205078 ],

[ 9.9774373769 , 5.4150885344 , 15.3295196381 ],

[ 17.8968318701 , 6.3442362547 , 15.3355201569 ],

[ 12.4450124502 , 5.3792475462 , 15.3395198669 ],

[ 7.4641383886 , 6.6904705763 , 15.3395198669 ],

[ 7.0937441587 , 9.4175289869 , 15.3415206757 ],

[ 15.0124725103 , 10.3460587263 , 15.3415206757 ],

[ 17.5255721807 , 9.0713833571 , 15.3455203857 ],

[ 14.9114221334 , 5.3143614531 , 15.3505195465 ],

[ 12.5454124212 , 10.3817280531 , 15.3515209045 ],

[ 9.9966491461 , 6.5061415434 , 15.3605197754 ],

[ 10.0795120001 , 10.4467886686 , 15.3625205841 ],

[ 12.467642188 , 6.4707411528 , 15.3665202942 ],

[ 14.993522048 , 9.2549170256 , 15.3675197449 ],

[ 12.5226320028 , 9.2901400328 , 15.3735202637 ],

[ 14.9397023916 , 6.4045313597 , 15.3805202332 ],

[ 11.2498019933 , 7.1785701513 , 15.386520752 ],

[ 8.8035310507 , 7.2244762182 , 15.386520752 ],

[ 10.0510219335 , 9.3566149473 , 15.386520752 ],

[ 16.1864818334 , 8.5368469954 , 15.3895210114 ],

[ 13.7406724691 , 8.582311511 , 15.3895210114 ],

[ 13.7089723348 , 7.1293982267 , 15.3915199127 ],

[ 11.2813028097 , 8.6314829588 , 15.3945201721 ],

[ 16.1298621893 , 7.0992072821 , 15.4015201416 ],

[ 8.8606122732 , 8.6620281935 , 15.4035209503 ],

[ 7.78969 , 8.037419960267, 18.4203265991 ],

[ 7.78969 , 6.230069801567, 20.2276767578 ],

[ 5.9823398413 , 8.037419960267, 20.2276767578 ],

[ 9.5970401587 , 8.037419960267, 20.2276767578 ],

[ 7.78969 , 9.844770118967, 20.2276767578 ],

[ 7.78969 , 4.422719881267, 22.0350269165 ],

[ 5.9823398413 , 6.230069801567, 22.0350269165 ],

[ 9.5970401587 , 6.230069801567, 22.0350269165 ],

[ 7.78969 , 8.037419960267, 22.0350269165 ],

[ 5.9823398413 , 9.844770118967, 22.0350269165 ],

[ 9.5970401587 , 9.844770118967, 22.0350269165 ],

[ 7.78969 , 11.652120277667, 22.0350269165 ],

[ 5.9823398413 , 4.422719881267, 23.8423770752 ],

[ 9.5970401587 , 4.422719881267, 23.8423770752 ],

[ 7.78969 , 6.230069801567, 23.8423770752 ],

[ 5.9823398413 , 8.037419960267, 23.8423770752 ],

[ 9.5970401587 , 8.037419960267, 23.8423770752 ],

[ 7.78969 , 9.844770118967, 23.8423770752 ],

[ 5.9823398413 , 11.652120277667, 23.8423770752 ],

[ 9.5970401587 , 11.652120277667, 23.8423770752 ],

[ 7.78969 , 4.422719881267, 25.6497272339 ],

[ 5.9823398413 , 6.230069801567, 25.6497272339 ],

[ 9.5970401587 , 6.230069801567, 25.6497272339 ],

[ 7.78969 , 8.037419960267, 25.6497272339 ],

[ 5.9823398413 , 9.844770118967, 25.6497272339 ],

[ 9.5970401587 , 9.844770118967, 25.6497272339 ],

[ 7.78969 , 11.652120277667, 25.6497272339 ],

[ 5.9823398413 , 4.422719881267, 27.4570773926 ],

[ 9.5970401587 , 4.422719881267, 27.4570773926 ],

[ 7.78969 , 6.230069801567, 27.4570773926 ],

[ 5.9823398413 , 8.037419960267, 27.4570773926 ],

[ 9.5970401587 , 8.037419960267, 27.4570773926 ],

[ 7.78969 , 9.844770118967, 27.4570773926 ],

[ 5.9823398413 , 11.652120277667, 27.4570773926 ],

[ 9.5970401587 , 11.652120277667, 27.4570773926 ],

[ 7.78969 , 4.422719881267, 29.2644275513 ],

[ 5.9823398413 , 6.230069801567, 29.2644275513 ],

[ 9.5970401587 , 6.230069801567, 29.2644275513 ],

[ 7.78969 , 8.037419960267, 29.2644275513 ],

[ 5.9823398413 , 9.844770118967, 29.2644275513 ],

[ 9.5970401587 , 9.844770118967, 29.2644275513 ],

[ 7.78969 , 11.652120277667, 29.2644275513 ]]*Angstrom

# Set up configuration

central_region = BulkConfiguration(

bravais_lattice=central_region_lattice,

elements=central_region_elements,

cartesian_coordinates=central_region_coordinates

)

device_configuration = DeviceConfiguration(

central_region,

[left_electrode, right_electrode],

equivalent_electrode_lengths=[7.22940064, 7.2293930054]*Angstrom,

transverse_electrode_repetitions=[[1, 1], [1, 1]],

)

# -------------------------------------------------------------

# Calculator

# -------------------------------------------------------------

#----------------------------------------

# Basis Set

#----------------------------------------

basis_set = [

GGABasis.Hydrogen_DoubleZetaPolarized,

GGABasis.Carbon_DoubleZetaPolarized,

GGABasis.Copper_DoubleZetaPolarized,

GGABasis.Selenium_DoubleZetaPolarized,

]

#----------------------------------------

# Numerical Accuracy Settings

#----------------------------------------

device_k_point_sampling = MonkhorstPackGrid(

na=2,

nc=261,

)

device_numerical_accuracy_parameters = NumericalAccuracyParameters(

density_mesh_cutoff=100.0*Hartree,

k_point_sampling=device_k_point_sampling,

)

#----------------------------------------

# Contour Integral Settings

#----------------------------------------

equilibrium_contour = SemiCircleContour(

integral_lower_bound=1.84481605655*Hartree,

circle_points=30,

)

contour_parameters = ContourParameters(

equilibrium_contour=equilibrium_contour,

)

#----------------------------------------

# Device Calculator

#----------------------------------------

calculator = DeviceLCAOCalculator(

basis_set=basis_set,

numerical_accuracy_parameters=device_numerical_accuracy_parameters,

contour_parameters=contour_parameters,

)

device_configuration.setCalculator(calculator)

nlprint(device_configuration)

nlsave('phy-Cu-ADS-Cu-C2-012-012.hdf5', device_configuration)

# -------------------------------------------------------------

# IV Characteristics

# -------------------------------------------------------------

# Kpoint sampling

kpoint_grid = MonkhorstPackGrid(

na=2,

)

# Gate-source voltages

gate_source_voltages = numpy.linspace(0, 0, 1)*Volt

# Drain-source voltages

drain_source_voltages = numpy.linspace(-0.12, 0.12, 7)*Volt

# File name.

filename = 'phy-Cu-ADS-Cu-C2-012-012.hdf5'

iv_characteristics = IVCharacteristics(

configuration=device_configuration,

filename=filename,

object_id='ivcharacteristics',

gate_regions=[],

gate_source_voltages=gate_source_voltages,

drain_source_voltages=drain_source_voltages,

energies=numpy.linspace(-2, 2, 201)*eV,

kpoints=kpoint_grid,

self_energy_calculator=RecursionSelfEnergy(),

energy_zero_parameter=AverageFermiLevel,

infinitesimal=1e-06*eV,

log_filename_prefix='ivcharacteristics_',

number_of_processes_per_task=None,

enforce_zero_transmission_in_band_gap=True,

)

iv_characteristics.update()

**chem-Cu-ADS-Cu-*c*2.py**

# -*- coding: utf-8 -*-

# -------------------------------------------------------------

# Two-probe Configuration

# -------------------------------------------------------------

# -------------------------------------------------------------

# Left Electrode

# -------------------------------------------------------------

# Set up lattice

vector_a = [25.0, 0.0, 0.0]*Angstrom

vector_b = [0.0, 15.0, 0.0]*Angstrom

vector_c = [0.0, 0.0, 3.61470032]*Angstrom

left_electrode_lattice = UnitCell(vector_a, vector_b, vector_c)

# Define elements

left_electrode_elements = [Copper, Copper, Copper, Copper, Copper, Copper, Copper, Copper,

Copper, Copper, Copper, Copper, Copper, Copper, Copper]

# Define coordinates

left_electrode_coordinates = [[ 10.6926496004 , 3.88530015845, 0.9035754 ],

[ 14.3073499204 , 3.88530015845, 0.9035754 ],

[ 12.4999997604 , 5.69265007845, 0.9035754 ],

[ 10.6926496004 , 7.50000023845, 0.9035754 ],

[ 14.3073499204 , 7.50000023845, 0.9035754 ],

[ 12.4999997604 , 9.30735039845, 0.9035754 ],

[ 10.6926496004 , 11.11470055845, 0.9035754 ],

[ 14.3073499204 , 11.11470055845, 0.9035754 ],

[ 12.4999997604 , 3.88530015845, 2.71092556 ],

[ 10.6926496004 , 5.69265007845, 2.71092556 ],

[ 14.3073499204 , 5.69265007845, 2.71092556 ],

[ 12.4999997604 , 7.50000023845, 2.71092556 ],

[ 10.6926496004 , 9.30735039845, 2.71092556 ],

[ 14.3073499204 , 9.30735039845, 2.71092556 ],

[ 12.4999997604 , 11.11470055845, 2.71092556 ]]*Angstrom

# Set up configuration

left_electrode = BulkConfiguration(

bravais_lattice=left_electrode_lattice,

elements=left_electrode_elements,

cartesian_coordinates=left_electrode_coordinates

)

# -------------------------------------------------------------

# Right Electrode

# -------------------------------------------------------------

# Set up lattice

vector_a = [25.0, 0.0, 0.0]*Angstrom

vector_b = [0.0, 15.0, 0.0]*Angstrom

vector_c = [0.0, 0.0, 3.6146965027]*Angstrom

right_electrode_lattice = UnitCell(vector_a, vector_b, vector_c)

# Define elements

right_electrode_elements = [Copper, Copper, Copper, Copper, Copper, Copper, Copper, Copper,

Copper, Copper, Copper, Copper, Copper, Copper, Copper]

# Define coordinates

right_electrode_coordinates = [[ 5.9823398413 , 4.422719881267, 0.9037728546 ],

[ 9.5970401587 , 4.422719881267, 0.9037728546 ],

[ 7.78969 , 6.230069801567, 0.9037728546 ],

[ 5.9823398413 , 8.037419960267, 0.9037728546 ],

[ 9.5970401587 , 8.037419960267, 0.9037728546 ],

[ 7.78969 , 9.844770118967, 0.9037728546 ],

[ 5.9823398413 , 11.652120277667, 0.9037728546 ],

[ 9.5970401587 , 11.652120277667, 0.9037728546 ],

[ 7.78969 , 4.422719881267, 2.7111230133 ],

[ 5.9823398413 , 6.230069801567, 2.7111230133 ],

[ 9.5970401587 , 6.230069801567, 2.7111230133 ],

[ 7.78969 , 8.037419960267, 2.7111230133 ],

[ 5.9823398413 , 9.844770118967, 2.7111230133 ],

[ 9.5970401587 , 9.844770118967, 2.7111230133 ],

[ 7.78969 , 11.652120277667, 2.7111230133 ]]*Angstrom

# Set up configuration

right_electrode = BulkConfiguration(

bravais_lattice=right_electrode_lattice,

elements=right_electrode_elements,

cartesian_coordinates=right_electrode_coordinates

)

# -------------------------------------------------------------

# Central Region

# -------------------------------------------------------------

# Set up lattice

vector_a = [25.0, 0.0, 0.0]*Angstrom

vector_b = [0.0, 15.0, 0.0]*Angstrom

vector_c = [0.0, 0.0, 30.167997226]*Angstrom

central_region_lattice = UnitCell(vector_a, vector_b, vector_c)

# Define elements

central_region_elements = [Copper, Copper, Copper, Copper, Copper, Copper, Copper, Copper,

Copper, Copper, Copper, Copper, Copper, Copper, Copper, Copper,

Copper, Copper, Copper, Copper, Copper, Copper, Copper, Copper,

Copper, Copper, Copper, Copper, Copper, Copper, Copper, Copper,

Copper, Copper, Copper, Copper, Copper, Copper, Copper, Copper,

Copper, Copper, Copper, Copper, Copper, Copper, Copper, Copper,

Copper, Copper, Copper, Copper, Copper, Copper, Copper, Copper,

Copper, Copper, Copper, Copper, Copper, Copper, Copper, Copper,

Copper, Copper, Copper, Copper, Copper, Copper, Copper, Copper,

Copper, Copper, Copper, Copper, Copper, Copper, Copper, Copper,

Copper, Copper, Copper, Copper, Copper, Copper, Copper, Copper,

Copper, Copper, Copper, Copper, Copper, Copper, Copper, Copper,

Copper, Copper, Copper, Copper, Copper, Copper, Copper, Copper,

Copper, Copper, Copper, Copper, Copper, Copper, Copper, Copper,

Copper, Copper, Copper, Copper, Copper, Copper, Copper, Copper,

Copper, Copper, Copper, Copper, Copper, Copper, Carbon, Carbon,

Carbon, Carbon, Carbon, Carbon, Carbon, Hydrogen, Carbon, Hydrogen,

Carbon, Hydrogen, Hydrogen, Carbon, Hydrogen, Carbon, Hydrogen,

Carbon, Selenium, Selenium, Carbon, Carbon, Carbon, Carbon, Carbon,

Carbon, Hydrogen, Hydrogen, Hydrogen, Hydrogen, Copper, Copper,

Copper, Copper, Copper, Copper, Copper, Copper, Copper, Copper,

Copper, Copper, Copper, Copper, Copper, Copper, Copper, Copper,

Copper, Copper, Copper, Copper, Copper, Copper, Copper, Copper,

Copper, Copper, Copper, Copper, Copper, Copper, Copper, Copper,

Copper, Copper, Copper, Copper, Copper, Copper, Copper, Copper]

# Define coordinates

central_region_coordinates = [[ 10.6926496004 , 3.88530015845 , 0.9035754 ],

[ 14.3073499204 , 3.88530015845 , 0.9035754 ],

[ 12.4999997604 , 5.69265007845 , 0.9035754 ],

[ 10.6926496004 , 7.50000023845 , 0.9035754 ],

[ 14.3073499204 , 7.50000023845 , 0.9035754 ],

[ 12.4999997604 , 9.30735039845 , 0.9035754 ],

[ 10.6926496004 , 11.11470055845 , 0.9035754 ],

[ 14.3073499204 , 11.11470055845 , 0.9035754 ],

[ 12.4999997604 , 3.88530015845 , 2.71092556 ],

[ 10.6926496004 , 5.69265007845 , 2.71092556 ],

[ 14.3073499204 , 5.69265007845 , 2.71092556 ],

[ 12.4999997604 , 7.50000023845 , 2.71092556 ],

[ 10.6926496004 , 9.30735039845 , 2.71092556 ],

[ 14.3073499204 , 9.30735039845 , 2.71092556 ],

[ 12.4999997604 , 11.11470055845 , 2.71092556 ],

[ 10.6926496004 , 3.88530015845 , 4.51827571 ],

[ 14.3073499204 , 3.88530015845 , 4.51827571 ],

[ 12.4999997604 , 5.69265007845 , 4.51827571 ],

[ 10.6926496004 , 7.50000023845 , 4.51827571 ],

[ 14.3073499204 , 7.50000023845 , 4.51827571 ],

[ 12.4999997604 , 9.30735039845 , 4.51827571 ],

[ 10.6926496004 , 11.11470055845 , 4.51827571 ],

[ 14.3073499204 , 11.11470055845 , 4.51827571 ],

[ 12.4999997604 , 3.88530015845 , 6.32562587 ],

[ 10.6926496004 , 5.69265007845 , 6.32562587 ],

[ 14.3073499204 , 5.69265007845 , 6.32562587 ],

[ 12.4999997604 , 7.50000023845 , 6.32562587 ],

[ 10.6926496004 , 9.30735039845 , 6.32562587 ],

[ 14.3073499204 , 9.30735039845 , 6.32562587 ],

[ 12.4999997604 , 11.11470055845 , 6.32562587 ],

[ 3.5799309611 , 11.55716919905 , 8.3275264587 ],

[ 15.0424889922 , 9.34946560865 , 8.3295253601 ],

[ 8.6729840636 , 11.56228852275 , 8.3295253601 ],

[ 11.2219085097 , 11.56317830085 , 8.3295253601 ],

[ 12.4971389175 , 9.34840607645 , 8.3305267181 ],

[ 6.1268658042 , 11.56008839615 , 8.3305267181 ],

[ 7.4030150771 , 9.34725880625 , 8.3315261688 ],

[ 2.3047119975 , 9.34911274915 , 8.3315261688 ],

[ 18.8709697127 , 11.55831837655 , 8.3315261688 ],

[ 13.7716493011 , 11.56228852275 , 8.3315261688 ],

[ 9.9510316253 , 4.93961262705 , 8.3325256195 ],

[ 4.8561820388 , 9.34734654425 , 8.3325256195 ],

[ 17.592489183 , 9.34955334665 , 8.3325256195 ],

[ 20.1437987685 , 9.35052514075 , 8.3325256195 ],

[ 16.3206691146 , 11.55911850935 , 8.3325256195 ],

[ 1.0331498981 , 11.55964875225 , 8.3325256195 ],

[ 9.9480122924 , 9.34611058235 , 8.3335269775 ],

[ 22.6923789382 , 4.93696475035 , 8.3345264282 ],

[ 4.8549208045 , 4.93731760985 , 8.3345264282 ],

[ 7.4022120833 , 4.93996596335 , 8.3345264282 ],

[ 3.5815238357 , 7.14255261425 , 8.3345264282 ],

[ 20.1435584426 , 4.93908381465 , 8.3355258789 ],

[ 17.5950984359 , 4.94058394435 , 8.3355258789 ],

[ 6.1295790076 , 7.14211153985 , 8.3355258789 ],

[ 18.8674086928 , 7.14202284815 , 8.3365253296 ],

[ 12.4989890456 , 4.94323277475 , 8.3375266876 ],

[ 15.0471991897 , 4.94393897055 , 8.3375266876 ],

[ 21.4148597121 , 7.14193463325 , 8.3375266876 ],

[ 8.6792153716 , 7.14105153085 , 8.339525589 ],

[ 11.2287492156 , 7.14193463325 , 8.339525589 ],

[ 16.3195590377 , 7.14069867135 , 8.3435252991 ],

[ 13.7724189162 , 7.14131665235 , 8.3445266571 ],

[ 9.9445418716 , 10.81861901285 , 10.3835281219 ],

[ 12.4942788482 , 10.82444882395 , 10.3865283813 ],

[ 7.3989838958 , 10.81438851355 , 10.3915275421 ],

[ 8.6754521728 , 4.19232296945 , 10.3925289001 ],

[ 15.0467690826 , 10.82656884195 , 10.3935283508 ],

[ 4.85342592 , 10.81367897995 , 10.3955272522 ],

[ 18.8749980331 , 8.61868405345 , 10.4005283203 ],

[ 17.6007880569 , 10.82532906535 , 10.4005283203 ],

[ 2.3080720305 , 10.81685853005 , 10.401527771 ],

[ 11.2252387404 , 4.20123887065 , 10.4035285797 ],

[ 16.3124694228 , 8.61912465095 , 10.4035285797 ],

[ 20.1508292556 , 10.82391858105 , 10.4035285797 ],

[ 3.5782069564 , 8.61162114145 , 10.4045280304 ],

[ 13.7743186355 , 4.20750689505 , 10.4065288391 ],

[ 22.6971186996 , 6.40797495845 , 10.4075282898 ],

[ 6.1288227439 , 4.20088553435 , 10.4085277405 ],

[ 23.9680690169 , 4.20097374915 , 10.4085277405 ],

[ 16.3220691085 , 4.20865464215 , 10.4085277405 ],

[ 21.4198493362 , 8.61426949505 , 10.4085277405 ],

[ 21.420368135 , 4.20397591595 , 10.4095290985 ],

[ 4.8575667739 , 6.40488457685 , 10.4125274506 ],

[ 6.1290659308 , 8.60738396645 , 10.4125274506 ],

[ 11.2245187163 , 8.61117959025 , 10.4125274506 ],

[ 13.7693585753 , 8.61524033545 , 10.4135288086 ],

[ 18.8718585372 , 4.20768380165 , 10.4145282593 ],

[ 8.6706475616 , 8.60508751875 , 10.4185279694 ],

[ 9.9620370269 , 6.40717959405 , 10.4205287781 ],

[ 7.4011368156 , 6.41044688225 , 10.4205287781 ],

[ 20.141158998 , 6.40656256675 , 10.4235290375 ],

[ 17.5994796157 , 6.40444350245 , 10.4285281982 ],

[ 15.0432690978 , 6.41159367565 , 10.4465278473 ],

[ 12.5025491118 , 6.41097664835 , 10.448528656 ],

[ 8.6872720122 , 5.64647078515 , 12.4315284576 ],

[ 17.5970286727 , 7.91191363335 , 12.434528717 ],

[ 12.503269136 , 3.43682169915 , 12.4465278473 ],

[ 13.7715491653 , 10.12773919105 , 12.447527298 ],

[ 15.0574387908 , 3.44732785225 , 12.448528656 ],

[ 11.2188491225 , 10.11361908915 , 12.4495281067 ],

[ 9.947875917 , 3.44538474085 , 12.4565280762 ],

[ 16.3248996139 , 10.11529850965 , 12.4595283356 ],

[ 8.6783398986 , 10.09710907935 , 12.4635280457 ],

[ 17.5960196853 , 3.46613073355 , 12.4665283051 ],

[ 7.4027771354 , 3.45624375345 , 12.4695285645 ],

[ 18.8733691573 , 10.10107827185 , 12.4715274658 ],

[ 6.1242699027 , 10.09066891675 , 12.4725288239 ],

[ 4.8411001563 , 7.87766051295 , 12.4795287933 ],

[ 9.9422063232 , 7.89178586005 , 12.4795287933 ],

[ 20.1558493972 , 3.46966171265 , 12.480528244 ],

[ 20.1448783279 , 7.89063763625 , 12.4815276947 ],

[ 3.5783550143 , 10.08351826675 , 12.4835285034 ],

[ 21.4328498244 , 5.67675185205 , 12.4845279541 ],

[ 1.0319309831 , 10.08924889565 , 12.4845279541 ],

[ 4.8559951186 , 3.46613073355 , 12.4865287628 ],

[ 2.3037478328 , 7.88110375405 , 12.4875282135 ],

[ 3.5876440406 , 5.67321991925 , 12.4885276642 ],

[ 22.6995696425 , 3.47213363655 , 12.4895290222 ],

[ 6.1311640143 , 5.66333270075 , 12.4895290222 ],

[ 11.2323693633 , 5.64161562925 , 12.4905284729 ],

[ 15.0495786071 , 7.92506670955 , 12.4905284729 ],

[ 16.3312396407 , 5.66633391385 , 12.4955276337 ],

[ 12.4942387939 , 7.92612671855 , 12.4975284424 ],

[ 7.3850778937 , 7.88640093805 , 12.5115283813 ],

[ 13.782109201 , 5.64143872265 , 12.5155280914 ],

[ 18.8853091598 , 5.66854071625 , 12.5215286102 ],

[ 12.9113587737 , 8.13729310035 , 14.6945289459 ],

[ 13.0834893584 , 5.30659270285 , 14.7055286255 ],

[ 14.2906188369 , 6.06438851355 , 14.7895282593 ],

[ 14.2116689086 , 7.51756691935 , 14.8045276489 ],

[ 11.7043790221 , 7.37817263605 , 14.8075279083 ],

[ 11.7805384994 , 5.92631888395 , 14.8165286865 ],

[ 15.5819491744 , 5.43795371055 , 14.8685287323 ],

[ 13.1451587081 , 4.23010659225 , 14.8795284119 ],

[ 10.417589128 , 8.00381302835 , 14.8825286713 ],

[ 12.8526391387 , 9.21148419385 , 14.8825286713 ],

[ 15.3983086944 , 8.28154206275 , 14.9235290375 ],

[ 15.6352185607 , 4.35131478315 , 14.9445289459 ],

[ 10.3650893569 , 9.09159970285 , 14.948528656 ],

[ 10.596439302 , 5.16322684295 , 14.9615272369 ],

[ 15.3206786513 , 9.36659169205 , 15.012527832 ],

[ 16.7231788039 , 6.23574090005 , 15.0285285797 ],

[ 10.6747292876 , 4.07702851295 , 15.0385288086 ],

[ 9.2784489989 , 7.20770382885 , 15.0655273285 ],

[ 18.5574797988 , 5.63216996195 , 15.0765289154 ],

[ 7.4520000815 , 7.82098460205 , 15.0765289154 ],

[ 16.6632880569 , 7.65307688715 , 15.0855277863 ],

[ 9.33115381 , 5.79116177565 , 15.1165279236 ],

[ 17.938159883 , 8.30096364025 , 15.2335285034 ],

[ 8.0496606231 , 5.14910197265 , 15.2535289612 ],

[ 6.9623531699 , 5.97760987285 , 15.2735275116 ],

[ 19.0282687545 , 7.47607493405 , 15.2755283203 ],

[ 18.033359468 , 9.38680768015 , 15.2845290985 ],

[ 7.9491547942 , 4.06396365165 , 15.3125289764 ],

[ 20.0781096816 , 7.74285674095 , 15.3655284729 ],

[ 5.9118980765 , 5.71859574325 , 15.3735278931 ],

[ 7.78969 , 8.037419960267, 18.4203265991 ],

[ 7.78969 , 6.230069801567, 20.2276767578 ],

[ 5.9823398413 , 8.037419960267, 20.2276767578 ],

[ 9.5970401587 , 8.037419960267, 20.2276767578 ],

[ 7.78969 , 9.844770118967, 20.2276767578 ],

[ 7.78969 , 4.422719881267, 22.0350269165 ],

[ 5.9823398413 , 6.230069801567, 22.0350269165 ],

[ 9.5970401587 , 6.230069801567, 22.0350269165 ],

[ 7.78969 , 8.037419960267, 22.0350269165 ],

[ 5.9823398413 , 9.844770118967, 22.0350269165 ],

[ 9.5970401587 , 9.844770118967, 22.0350269165 ],

[ 7.78969 , 11.652120277667, 22.0350269165 ],

[ 5.9823398413 , 4.422719881267, 23.8423770752 ],

[ 9.5970401587 , 4.422719881267, 23.8423770752 ],

[ 7.78969 , 6.230069801567, 23.8423770752 ],

[ 5.9823398413 , 8.037419960267, 23.8423770752 ],

[ 9.5970401587 , 8.037419960267, 23.8423770752 ],

[ 7.78969 , 9.844770118967, 23.8423770752 ],

[ 5.9823398413 , 11.652120277667, 23.8423770752 ],

[ 9.5970401587 , 11.652120277667, 23.8423770752 ],

[ 7.78969 , 4.422719881267, 25.6497272339 ],

[ 5.9823398413 , 6.230069801567, 25.6497272339 ],

[ 9.5970401587 , 6.230069801567, 25.6497272339 ],

[ 7.78969 , 8.037419960267, 25.6497272339 ],

[ 5.9823398413 , 9.844770118967, 25.6497272339 ],

[ 9.5970401587 , 9.844770118967, 25.6497272339 ],

[ 7.78969 , 11.652120277667, 25.6497272339 ],

[ 5.9823398413 , 4.422719881267, 27.4570773926 ],

[ 9.5970401587 , 4.422719881267, 27.4570773926 ],

[ 7.78969 , 6.230069801567, 27.4570773926 ],

[ 5.9823398413 , 8.037419960267, 27.4570773926 ],

[ 9.5970401587 , 8.037419960267, 27.4570773926 ],

[ 7.78969 , 9.844770118967, 27.4570773926 ],

[ 5.9823398413 , 11.652120277667, 27.4570773926 ],

[ 9.5970401587 , 11.652120277667, 27.4570773926 ],

[ 7.78969 , 4.422719881267, 29.2644275513 ],

[ 5.9823398413 , 6.230069801567, 29.2644275513 ],

[ 9.5970401587 , 6.230069801567, 29.2644275513 ],

[ 7.78969 , 8.037419960267, 29.2644275513 ],

[ 5.9823398413 , 9.844770118967, 29.2644275513 ],

[ 9.5970401587 , 9.844770118967, 29.2644275513 ],

[ 7.78969 , 11.652120277667, 29.2644275513 ]]*Angstrom

# Set up configuration

central_region = BulkConfiguration(

bravais_lattice=central_region_lattice,

elements=central_region_elements,

cartesian_coordinates=central_region_coordinates

)

device_configuration = DeviceConfiguration(

central_region,

[left_electrode, right_electrode],

equivalent_electrode_lengths=[7.22940064, 7.2293930054]*Angstrom,

transverse_electrode_repetitions=[[1, 1], [1, 1]],

)

# -------------------------------------------------------------

# Calculator

# -------------------------------------------------------------

#----------------------------------------

# Basis Set

#----------------------------------------

basis_set = [

GGABasis.Hydrogen_DoubleZetaPolarized,

GGABasis.Carbon_DoubleZetaPolarized,

GGABasis.Copper_DoubleZetaPolarized,

GGABasis.Selenium_DoubleZetaPolarized,

]

#----------------------------------------

# Numerical Accuracy Settings

#----------------------------------------

device_k_point_sampling = MonkhorstPackGrid(

na=2,

nc=261,

)

device_numerical_accuracy_parameters = NumericalAccuracyParameters(

density_mesh_cutoff=100.0*Hartree,

k_point_sampling=device_k_point_sampling,

)

#----------------------------------------

# Contour Integral Settings

#----------------------------------------

equilibrium_contour = SemiCircleContour(

integral_lower_bound=1.84481605655*Hartree,

circle_points=30,

)

contour_parameters = ContourParameters(

equilibrium_contour=equilibrium_contour,

)

#----------------------------------------

# Device Calculator

#----------------------------------------

calculator = DeviceLCAOCalculator(

basis_set=basis_set,

numerical_accuracy_parameters=device_numerical_accuracy_parameters,

contour_parameters=contour_parameters,

)

device_configuration.setCalculator(calculator)

nlprint(device_configuration)

nlsave('chem-Cu-ADS-Cu-C2-012-012.hdf5', device_configuration)

# -------------------------------------------------------------

# IV Characteristics

# -------------------------------------------------------------

# Kpoint sampling

kpoint_grid = MonkhorstPackGrid(

na=2,

)

# Gate-source voltages

gate_source_voltages = numpy.linspace(0, 0, 1)*Volt

# Drain-source voltages

drain_source_voltages = numpy.linspace(-0.12, 0.12, 7)*Volt

# File name.

filename = 'chem-Cu-ADS-Cu-C2-012-012.hdf5'

iv_characteristics = IVCharacteristics(

configuration=device_configuration,

filename=filename,

object_id='ivcharacteristics',

gate_regions=[],

gate_source_voltages=gate_source_voltages,

drain_source_voltages=drain_source_voltages,

energies=numpy.linspace(-2, 2, 201)*eV,

kpoints=kpoint_grid,

self_energy_calculator=RecursionSelfEnergy(),

energy_zero_parameter=AverageFermiLevel,

infinitesimal=1e-06*eV,

log_filename_prefix='ivcharacteristics_',

number_of_processes_per_task=None,

enforce_zero_transmission_in_band_gap=True,

)

iv_characteristics.update()

**phys-Cu-ADS-Cu-*t*1.py**

# -*- coding: utf-8 -*-

# -------------------------------------------------------------

# Two-probe Configuration

# -------------------------------------------------------------

# -------------------------------------------------------------

# Left Electrode

# -------------------------------------------------------------

# Set up lattice

vector_a = [25.0, 0.0, 0.0]*Angstrom

vector_b = [0.0, 15.0, 0.0]*Angstrom

vector_c = [0.0, 0.0, 3.61470032]*Angstrom

left_electrode_lattice = UnitCell(vector_a, vector_b, vector_c)

# Define elements

left_electrode_elements = [Copper, Copper, Copper, Copper, Copper, Copper, Copper, Copper,

Copper, Copper, Copper, Copper, Copper, Copper, Copper]

# Define coordinates

left_electrode_coordinates = [[ 10.6926501976, 3.8852998008, 0.9035754 ],

[ 14.3073505176, 3.8852998008, 0.9035754 ],

[ 12.5000003576, 5.6926497208, 0.9035754 ],

[ 10.6926501976, 7.4999998808, 0.9035754 ],

[ 14.3073505176, 7.4999998808, 0.9035754 ],

[ 12.5000003576, 9.3073500408, 0.9035754 ],

[ 10.6926501976, 11.1147002008, 0.9035754 ],

[ 14.3073505176, 11.1147002008, 0.9035754 ],

[ 12.5000003576, 3.8852998008, 2.71092556 ],

[ 10.6926501976, 5.6926497208, 2.71092556 ],

[ 14.3073505176, 5.6926497208, 2.71092556 ],

[ 12.5000003576, 7.4999998808, 2.71092556 ],

[ 10.6926501976, 9.3073500408, 2.71092556 ],

[ 14.3073505176, 9.3073500408, 2.71092556 ],

[ 12.5000003576, 11.1147002008, 2.71092556 ]]*Angstrom

# Set up configuration

left_electrode = BulkConfiguration(

bravais_lattice=left_electrode_lattice,

elements=left_electrode_elements,

cartesian_coordinates=left_electrode_coordinates

)

# -------------------------------------------------------------

# Right Electrode

# -------------------------------------------------------------

# Set up lattice

vector_a = [25.0, 0.0, 0.0]*Angstrom

vector_b = [0.0, 15.0, 0.0]*Angstrom

vector_c = [0.0, 0.0, 3.6146965027]*Angstrom

right_electrode_lattice = UnitCell(vector_a, vector_b, vector_c)

# Define elements

right_electrode_elements = [Copper, Copper, Copper, Copper, Copper, Copper, Copper, Copper,

Copper, Copper, Copper, Copper, Copper, Copper, Copper]

# Define coordinates

right_electrode_coordinates = [[ 10.7152498413 , 5.675439881267, 0.9037728546 ],

[ 14.3299501587 , 5.675439881267, 0.9037728546 ],

[ 12.5226 , 7.482789801567, 0.9037728546 ],

[ 10.7152498413 , 9.290139960267, 0.9037728546 ],

[ 14.3299501587 , 9.290139960267, 0.9037728546 ],

[ 12.5226 , 11.097490118967, 0.9037728546 ],

[ 10.7152498413 , 12.904840277667, 0.9037728546 ],

[ 14.3299501587 , 12.904840277667, 0.9037728546 ],

[ 12.5226 , 5.675439881267, 2.7111230133 ],

[ 10.7152498413 , 7.482789801567, 2.7111230133 ],

[ 14.3299501587 , 7.482789801567, 2.7111230133 ],

[ 12.5226 , 9.290139960267, 2.7111230133 ],

[ 10.7152498413 , 11.097490118967, 2.7111230133 ],

[ 14.3299501587 , 11.097490118967, 2.7111230133 ],

[ 12.5226 , 12.904840277667, 2.7111230133 ]]*Angstrom

# Set up configuration

right_electrode = BulkConfiguration(

bravais_lattice=right_electrode_lattice,

elements=right_electrode_elements,

cartesian_coordinates=right_electrode_coordinates

)

# -------------------------------------------------------------

# Central Region

# -------------------------------------------------------------

# Set up lattice

vector_a = [25.0, 0.0, 0.0]*Angstrom

vector_b = [0.0, 15.0, 0.0]*Angstrom

vector_c = [0.0, 0.0, 30.167997226]*Angstrom

central_region_lattice = UnitCell(vector_a, vector_b, vector_c)

# Define elements

central_region_elements = [Copper, Copper, Copper, Copper, Copper, Copper, Copper, Copper,

Copper, Copper, Copper, Copper, Copper, Copper, Copper, Copper,

Copper, Copper, Copper, Copper, Copper, Copper, Copper, Copper,

Copper, Copper, Copper, Copper, Copper, Copper, Copper, Copper,

Copper, Copper, Copper, Copper, Copper, Copper, Copper, Copper,

Copper, Copper, Copper, Copper, Copper, Copper, Copper, Copper,

Copper, Copper, Copper, Copper, Copper, Copper, Copper, Copper,

Copper, Copper, Copper, Copper, Copper, Copper, Copper, Copper,

Copper, Copper, Copper, Copper, Copper, Copper, Copper, Copper,

Copper, Copper, Copper, Copper, Copper, Copper, Copper, Copper,

Copper, Copper, Copper, Copper, Copper, Copper, Copper, Copper,

Copper, Copper, Copper, Copper, Copper, Copper, Copper, Copper,

Copper, Copper, Copper, Copper, Copper, Copper, Copper, Copper,

Copper, Copper, Copper, Copper, Copper, Copper, Copper, Copper,

Copper, Copper, Copper, Copper, Copper, Copper, Copper, Copper,

Copper, Copper, Copper, Copper, Copper, Copper, Hydrogen, Hydrogen,

Hydrogen, Hydrogen, Carbon, Carbon, Hydrogen, Selenium, Hydrogen,

Carbon, Selenium, Hydrogen, Carbon, Hydrogen, Hydrogen, Carbon,

Hydrogen, Carbon, Carbon, Carbon, Carbon, Carbon, Carbon, Carbon,

Carbon, Carbon, Carbon, Carbon, Carbon, Carbon, Copper, Copper,

Copper, Copper, Copper, Copper, Copper, Copper, Copper, Copper,

Copper, Copper, Copper, Copper, Copper, Copper, Copper, Copper,

Copper, Copper, Copper, Copper, Copper, Copper, Copper, Copper,

Copper, Copper, Copper, Copper, Copper, Copper, Copper, Copper,

Copper, Copper, Copper, Copper, Copper, Copper, Copper, Copper]

# Define coordinates

central_region_coordinates = [[ 10.6926501976 , 3.8852998008 , 0.9035754 ],

[ 14.3073505176 , 3.8852998008 , 0.9035754 ],

[ 12.5000003576 , 5.6926497208 , 0.9035754 ],

[ 10.6926501976 , 7.4999998808 , 0.9035754 ],

[ 14.3073505176 , 7.4999998808 , 0.9035754 ],

[ 12.5000003576 , 9.3073500408 , 0.9035754 ],

[ 10.6926501976 , 11.1147002008 , 0.9035754 ],

[ 14.3073505176 , 11.1147002008 , 0.9035754 ],

[ 12.5000003576 , 3.8852998008 , 2.71092556 ],

[ 10.6926501976 , 5.6926497208 , 2.71092556 ],

[ 14.3073505176 , 5.6926497208 , 2.71092556 ],

[ 12.5000003576 , 7.4999998808 , 2.71092556 ],

[ 10.6926501976 , 9.3073500408 , 2.71092556 ],

[ 14.3073505176 , 9.3073500408 , 2.71092556 ],

[ 12.5000003576 , 11.1147002008 , 2.71092556 ],

[ 10.6926501976 , 3.8852998008 , 4.51827571 ],

[ 14.3073505176 , 3.8852998008 , 4.51827571 ],

[ 12.5000003576 , 5.6926497208 , 4.51827571 ],

[ 10.6926501976 , 7.4999998808 , 4.51827571 ],

[ 14.3073505176 , 7.4999998808 , 4.51827571 ],

[ 12.5000003576 , 9.3073500408 , 4.51827571 ],

[ 10.6926501976 , 11.1147002008 , 4.51827571 ],

[ 14.3073505176 , 11.1147002008 , 4.51827571 ],

[ 12.5000003576 , 3.8852998008 , 6.32562587 ],

[ 10.6926501976 , 5.6926497208 , 6.32562587 ],

[ 14.3073505176 , 5.6926497208 , 6.32562587 ],

[ 12.5000003576 , 7.4999998808 , 6.32562587 ],

[ 10.6926501976 , 9.3073500408 , 6.32562587 ],

[ 14.3073505176 , 9.3073500408 , 6.32562587 ],

[ 12.5000003576 , 11.1147002008 , 6.32562587 ],

[ 17.5967715978 , 9.3386067152 , 8.3295234528 ],

[ 12.4982122183 , 9.338783145 , 8.3295234528 ],

[ 15.0474427938 , 9.338783145 , 8.3295234528 ],

[ 7.4022172689 , 4.92195642 , 8.3305248108 ],

[ 8.6758559942 , 7.1302813292 , 8.3305248108 ],

[ 16.3218616247 , 7.1303704977 , 8.3305248108 ],

[ 11.2250322103 , 7.1307233572 , 8.3305248108 ],

[ 13.7725824117 , 7.1308115721 , 8.3305248108 ],

[ 7.4001153707 , 9.337459445 , 8.3305248108 ],

[ 9.9483741522 , 9.3377236128 , 8.3305248108 ],

[ 9.9506295919 , 4.9216035605 , 8.3315242615 ],

[ 18.8701728582 , 7.1298402548 , 8.3315242615 ],

[ 6.1271384954 , 7.1308115721 , 8.3315242615 ],

[ 2.3052273988 , 9.3372820616 , 8.3315242615 ],

[ 20.1456416845 , 9.3378123045 , 8.3315242615 ],

[ 12.4977124929 , 4.9221333265 , 8.3325237122 ],

[ 15.0472024679 , 4.923104167 , 8.3325237122 ],

[ 17.5956119299 , 4.9234575033 , 8.3325237122 ],

[ 1.0317283869 , 11.5441082716 , 8.3325237122 ],

[ 4.8536013365 , 4.9226626158 , 8.3335250702 ],

[ 4.8526204824 , 9.3372820616 , 8.3335250702 ],

[ 18.8703616857 , 11.5448979139 , 8.3335250702 ],

[ 16.3215926885 , 11.5455187559 , 8.3335250702 ],

[ 22.6925929784 , 4.9235452414 , 8.3345245209 ],

[ 3.5791333914 , 7.1301053763 , 8.3345245209 ],

[ 8.6743663549 , 11.5436686277 , 8.3345245209 ],

[ 11.2236922979 , 11.5448979139 , 8.3345245209 ],

[ 20.1432632208 , 4.9233692885 , 8.3355239716 ],

[ 3.5811084509 , 11.5424288511 , 8.3355239716 ],

[ 6.1270755529 , 11.5431383848 , 8.3355239716 ],

[ 13.7718518972 , 11.5467585325 , 8.3355239716 ],

[ 21.4163917303 , 7.1290453673 , 8.3365234222 ],

[ 16.3254722357 , 8.6050871611 , 10.3975204315 ],

[ 7.4034365415 , 6.3877586126 , 10.3985198822 ],

[ 18.8768924474 , 8.6034106016 , 10.3985198822 ],

[ 13.7747119665 , 8.6052645445 , 10.3985198822 ],

[ 9.9537853002 , 6.3889945746 , 10.3995193329 ],

[ 11.2250322103 , 8.6035870314 , 10.3995193329 ],

[ 8.6741193533 , 8.6019095183 , 10.4005206909 ],

[ 15.0479120016 , 6.3922604323 , 10.4025195923 ],

[ 12.5008720159 , 6.3902305365 , 10.4035209503 ],

[ 4.8547695875 , 6.3913773298 , 10.4055198517 ],

[ 17.5979522466 , 6.3919075728 , 10.4055198517 ],

[ 6.124993205 , 8.6024397612 , 10.4055198517 ],

[ 8.6783117056 , 4.1820815802 , 10.4065193024 ],

[ 21.4235728979 , 8.6018217802 , 10.4065193024 ],

[ 17.5978416204 , 10.8099688292 , 10.4065193024 ],

[ 15.0470327139 , 10.8105887175 , 10.4065193024 ],

[ 6.1300524473 , 4.1825236082 , 10.4075206604 ],

[ 13.77498281 , 4.1855243445 , 10.4075206604 ],

[ 9.9520400762 , 10.808118701 , 10.4075206604 ],

[ 20.1480315923 , 10.8086479902 , 10.4075206604 ],

[ 16.3233932256 , 4.1862305403 , 10.4085201111 ],

[ 3.5769883394 , 8.6006735563 , 10.4085201111 ],

[ 2.3083823919 , 10.8060883284 , 10.4085201111 ],

[ 12.4992822408 , 10.8076781035 , 10.4085201111 ],

[ 11.226362586 , 4.1837595701 , 10.4095195618 ],

[ 23.9682716131 , 4.1861423254 , 10.4105209198 ],

[ 21.4196132421 , 4.1876434088 , 10.4105209198 ],

[ 22.6926330328 , 6.3927901983 , 10.4115203705 ],

[ 7.401640296 , 10.8059080839 , 10.4115203705 ],

[ 18.8695625066 , 4.1894096136 , 10.4155200806 ],

[ 20.1413730383 , 6.3917301893 , 10.4155200806 ],

[ 4.8580693006 , 10.8042286635 , 10.4165195312 ],

[ 17.6028426885 , 7.8792494536 , 12.4435199585 ],

[ 7.4003232717 , 7.8543542624 , 12.4455207672 ],

[ 15.0510619878 , 7.8713043928 , 12.4475196686 ],

[ 9.9517930746 , 7.8621233702 , 12.4485210266 ],

[ 12.5014823675 , 7.8676842451 , 12.4485210266 ],

[ 8.68472898 , 5.6544164419 , 12.4695209351 ],

[ 16.3181327581 , 10.0786579847 , 12.4715198364 ],

[ 16.315292716 , 5.6593593359 , 12.4725192871 ],

[ 4.850279212 , 7.8617705107 , 12.4725192871 ],

[ 20.1516631841 , 7.8707741499 , 12.4725192871 ],

[ 6.1308635473 , 5.6543272734 , 12.4735206451 ],

[ 8.6862453222 , 10.0728281736 , 12.4745200958 ],

[ 18.8722518682 , 10.0786579847 , 12.4745200958 ],

[ 11.2296222448 , 5.6594485045 , 12.4775203552 ],

[ 13.7753823995 , 5.6615666151 , 12.4795192566 ],

[ 13.7727721929 , 10.0747784376 , 12.4795192566 ],

[ 11.2267020941 , 10.0721281767 , 12.4815200653 ],

[ 12.5062822103 , 3.4577444792 , 12.4845203247 ],

[ 7.4079812765 , 3.4532414675 , 12.4855197754 ],

[ 17.5894016027 , 3.4532414675 , 12.4865211334 ],

[ 22.6909126043 , 3.4532414675 , 12.4865211334 ],

[ 1.0334143638 , 10.0746887922 , 12.4865211334 ],

[ 3.581941247 , 5.6576822996 , 12.4875205841 ],

[ 15.0485318899 , 3.4532414675 , 12.4895194855 ],

[ 20.1410716772 , 3.4532414675 , 12.4895194855 ],

[ 9.9574121237 , 3.453594327 , 12.4895194855 ],

[ 4.855898261 , 3.4532414675 , 12.4905208435 ],

[ 3.5851904154 , 10.0723885298 , 12.4915202942 ],

[ 21.4170516729 , 5.6589182615 , 12.4925197449 ],

[ 2.3069642782 , 7.8663605452 , 12.4925197449 ],

[ 18.8651832342 , 5.6610373259 , 12.5005210724 ],

[ 6.1369675398 , 10.0718582869 , 12.5005210724 ],

[ 19.5994724035 , 8.3293017149 , 15.2635196533 ],

[ 5.3906463384 , 7.4332584143 , 15.2665199127 ],

[ 7.266028285 , 5.6183093786 , 15.3015197601 ],

[ 17.7235816717 , 10.1437186003 , 15.311519989 ],

[ 18.5279124975 , 8.1502693892 , 15.3155196991 ],

[ 6.4621514082 , 7.6120256186 , 15.3175205078 ],

[ 9.9774373769 , 5.4150885344 , 15.3295196381 ],

[ 17.8968318701 , 6.3442362547 , 15.3355201569 ],

[ 12.4450124502 , 5.3792475462 , 15.3395198669 ],

[ 7.4641383886 , 6.6904705763 , 15.3395198669 ],

[ 7.0937441587 , 9.4175289869 , 15.3415206757 ],

[ 15.0124725103 , 10.3460587263 , 15.3415206757 ],

[ 17.5255721807 , 9.0713833571 , 15.3455203857 ],

[ 14.9114221334 , 5.3143614531 , 15.3505195465 ],

[ 12.5454124212 , 10.3817280531 , 15.3515209045 ],

[ 9.9966491461 , 6.5061415434 , 15.3605197754 ],

[ 10.0795120001 , 10.4467886686 , 15.3625205841 ],

[ 12.467642188 , 6.4707411528 , 15.3665202942 ],

[ 14.993522048 , 9.2549170256 , 15.3675197449 ],

[ 12.5226320028 , 9.2901400328 , 15.3735202637 ],

[ 14.9397023916 , 6.4045313597 , 15.3805202332 ],

[ 11.2498019933 , 7.1785701513 , 15.386520752 ],

[ 8.8035310507 , 7.2244762182 , 15.386520752 ],

[ 10.0510219335 , 9.3566149473 , 15.386520752 ],

[ 16.1864818334 , 8.5368469954 , 15.3895210114 ],

[ 13.7406724691 , 8.582311511 , 15.3895210114 ],

[ 13.7089723348 , 7.1293982267 , 15.3915199127 ],

[ 11.2813028097 , 8.6314829588 , 15.3945201721 ],

[ 16.1298621893 , 7.0992072821 , 15.4015201416 ],

[ 8.8606122732 , 8.6620281935 , 15.4035209503 ],

[ 12.5226 , 9.290139960267, 18.4203265991 ],

[ 12.5226 , 7.482789801567, 20.2276767578 ],

[ 10.7152498413 , 9.290139960267, 20.2276767578 ],

[ 14.3299501587 , 9.290139960267, 20.2276767578 ],

[ 12.5226 , 11.097490118967, 20.2276767578 ],

[ 12.5226 , 5.675439881267, 22.0350269165 ],

[ 10.7152498413 , 7.482789801567, 22.0350269165 ],

[ 14.3299501587 , 7.482789801567, 22.0350269165 ],

[ 12.5226 , 9.290139960267, 22.0350269165 ],

[ 10.7152498413 , 11.097490118967, 22.0350269165 ],

[ 14.3299501587 , 11.097490118967, 22.0350269165 ],

[ 12.5226 , 12.904840277667, 22.0350269165 ],

[ 10.7152498413 , 5.675439881267, 23.8423770752 ],

[ 14.3299501587 , 5.675439881267, 23.8423770752 ],

[ 12.5226 , 7.482789801567, 23.8423770752 ],

[ 10.7152498413 , 9.290139960267, 23.8423770752 ],

[ 14.3299501587 , 9.290139960267, 23.8423770752 ],

[ 12.5226 , 11.097490118967, 23.8423770752 ],

[ 10.7152498413 , 12.904840277667, 23.8423770752 ],

[ 14.3299501587 , 12.904840277667, 23.8423770752 ],

[ 12.5226 , 5.675439881267, 25.6497272339 ],

[ 10.7152498413 , 7.482789801567, 25.6497272339 ],

[ 14.3299501587 , 7.482789801567, 25.6497272339 ],

[ 12.5226 , 9.290139960267, 25.6497272339 ],

[ 10.7152498413 , 11.097490118967, 25.6497272339 ],

[ 14.3299501587 , 11.097490118967, 25.6497272339 ],

[ 12.5226 , 12.904840277667, 25.6497272339 ],

[ 10.7152498413 , 5.675439881267, 27.4570773926 ],

[ 14.3299501587 , 5.675439881267, 27.4570773926 ],

[ 12.5226 , 7.482789801567, 27.4570773926 ],

[ 10.7152498413 , 9.290139960267, 27.4570773926 ],

[ 14.3299501587 , 9.290139960267, 27.4570773926 ],

[ 12.5226 , 11.097490118967, 27.4570773926 ],

[ 10.7152498413 , 12.904840277667, 27.4570773926 ],

[ 14.3299501587 , 12.904840277667, 27.4570773926 ],

[ 12.5226 , 5.675439881267, 29.2644275513 ],

[ 10.7152498413 , 7.482789801567, 29.2644275513 ],

[ 14.3299501587 , 7.482789801567, 29.2644275513 ],

[ 12.5226 , 9.290139960267, 29.2644275513 ],

[ 10.7152498413 , 11.097490118967, 29.2644275513 ],

[ 14.3299501587 , 11.097490118967, 29.2644275513 ],

[ 12.5226 , 12.904840277667, 29.2644275513 ]]*Angstrom

# Set up configuration

central_region = BulkConfiguration(

bravais_lattice=central_region_lattice,

elements=central_region_elements,

cartesian_coordinates=central_region_coordinates

)

device_configuration = DeviceConfiguration(

central_region,

[left_electrode, right_electrode],

equivalent_electrode_lengths=[7.22940064, 7.2293930054]*Angstrom,

transverse_electrode_repetitions=[[1, 1], [1, 1]],

)

# -------------------------------------------------------------

# Calculator

# -------------------------------------------------------------

#----------------------------------------

# Basis Set

#----------------------------------------

basis_set = [

GGABasis.Hydrogen_DoubleZetaPolarized,

GGABasis.Carbon_DoubleZetaPolarized,

GGABasis.Copper_DoubleZetaPolarized,

GGABasis.Selenium_DoubleZetaPolarized,

]

#----------------------------------------

# Numerical Accuracy Settings

#----------------------------------------

device_k_point_sampling = MonkhorstPackGrid(

na=2,

nc=261,

)

device_numerical_accuracy_parameters = NumericalAccuracyParameters(

density_mesh_cutoff=100.0*Hartree,

k_point_sampling=device_k_point_sampling,

)

#----------------------------------------

# Contour Integral Settings

#----------------------------------------

equilibrium_contour = SemiCircleContour(

integral_lower_bound=1.84481605655*Hartree,

circle_points=30,

)

contour_parameters = ContourParameters(

equilibrium_contour=equilibrium_contour,

)

#----------------------------------------

# Device Calculator

#----------------------------------------

calculator = DeviceLCAOCalculator(

basis_set=basis_set,

numerical_accuracy_parameters=device_numerical_accuracy_parameters,

contour_parameters=contour_parameters,

)

device_configuration.setCalculator(calculator)

nlprint(device_configuration)

nlsave('phy-Cu-ADS-Cu-t1-012-012.hdf5', device_configuration)

# -------------------------------------------------------------

# IV Characteristics

# -------------------------------------------------------------

# Kpoint sampling

kpoint_grid = MonkhorstPackGrid(

na=2,

)

# Gate-source voltages

gate_source_voltages = numpy.linspace(0, 0, 1)*Volt

# Drain-source voltages

drain_source_voltages = numpy.linspace(-0.12, 0.12, 7)*Volt

# File name.

filename = 'phy-Cu-ADS-Cu-t1-012-012.hdf5'

iv_characteristics = IVCharacteristics(

configuration=device_configuration,

filename=filename,

object_id='ivcharacteristics',

gate_regions=[],

gate_source_voltages=gate_source_voltages,

drain_source_voltages=drain_source_voltages,

energies=numpy.linspace(-2, 2, 201)*eV,

kpoints=kpoint_grid,

self_energy_calculator=RecursionSelfEnergy(),

energy_zero_parameter=AverageFermiLevel,

infinitesimal=1e-06*eV,

log_filename_prefix='ivcharacteristics_',

number_of_processes_per_task=None,

enforce_zero_transmission_in_band_gap=True,

)

iv_characteristics.update()

**chem-Cu-ADS-Cu-*t*1.py**

# -*- coding: utf-8 -*-

# -------------------------------------------------------------

# Two-probe Configuration

# -------------------------------------------------------------

# -------------------------------------------------------------

# Left Electrode

# -------------------------------------------------------------

# Set up lattice

vector_a = [25.0, 0.0, 0.0]*Angstrom

vector_b = [0.0, 15.0, 0.0]*Angstrom

vector_c = [0.0, 0.0, 3.61470032]*Angstrom

left_electrode_lattice = UnitCell(vector_a, vector_b, vector_c)

# Define elements

left_electrode_elements = [Copper, Copper, Copper, Copper, Copper, Copper, Copper, Copper,

Copper, Copper, Copper, Copper, Copper, Copper, Copper]

# Define coordinates

left_electrode_coordinates = [[ 10.6926496004 , 3.88530015845, 0.9035754 ],

[ 14.3073499204 , 3.88530015845, 0.9035754 ],

[ 12.4999997604 , 5.69265007845, 0.9035754 ],

[ 10.6926496004 , 7.50000023845, 0.9035754 ],

[ 14.3073499204 , 7.50000023845, 0.9035754 ],

[ 12.4999997604 , 9.30735039845, 0.9035754 ],

[ 10.6926496004 , 11.11470055845, 0.9035754 ],

[ 14.3073499204 , 11.11470055845, 0.9035754 ],

[ 12.4999997604 , 3.88530015845, 2.71092556 ],

[ 10.6926496004 , 5.69265007845, 2.71092556 ],

[ 14.3073499204 , 5.69265007845, 2.71092556 ],

[ 12.4999997604 , 7.50000023845, 2.71092556 ],

[ 10.6926496004 , 9.30735039845, 2.71092556 ],

[ 14.3073499204 , 9.30735039845, 2.71092556 ],

[ 12.4999997604 , 11.11470055845, 2.71092556 ]]*Angstrom

# Set up configuration

left_electrode = BulkConfiguration(

bravais_lattice=left_electrode_lattice,

elements=left_electrode_elements,

cartesian_coordinates=left_electrode_coordinates

)

# -------------------------------------------------------------

# Right Electrode

# -------------------------------------------------------------

# Set up lattice

vector_a = [25.0, 0.0, 0.0]*Angstrom

vector_b = [0.0, 15.0, 0.0]*Angstrom

vector_c = [0.0, 0.0, 3.6146965027]*Angstrom

right_electrode_lattice = UnitCell(vector_a, vector_b, vector_c)

# Define elements

right_electrode_elements = [Copper, Copper, Copper, Copper, Copper, Copper, Copper, Copper,

Copper, Copper, Copper, Copper, Copper, Copper, Copper]

# Define coordinates

right_electrode_coordinates = [[ 10.7152498413 , 5.675439881267, 0.9037728546 ],

[ 14.3299501587 , 5.675439881267, 0.9037728546 ],

[ 12.5226 , 7.482789801567, 0.9037728546 ],

[ 10.7152498413 , 9.290139960267, 0.9037728546 ],

[ 14.3299501587 , 9.290139960267, 0.9037728546 ],

[ 12.5226 , 11.097490118967, 0.9037728546 ],

[ 10.7152498413 , 12.904840277667, 0.9037728546 ],

[ 14.3299501587 , 12.904840277667, 0.9037728546 ],

[ 12.5226 , 5.675439881267, 2.7111230133 ],

[ 10.7152498413 , 7.482789801567, 2.7111230133 ],

[ 14.3299501587 , 7.482789801567, 2.7111230133 ],

[ 12.5226 , 9.290139960267, 2.7111230133 ],

[ 10.7152498413 , 11.097490118967, 2.7111230133 ],

[ 14.3299501587 , 11.097490118967, 2.7111230133 ],

[ 12.5226 , 12.904840277667, 2.7111230133 ]]*Angstrom

# Set up configuration

right_electrode = BulkConfiguration(

bravais_lattice=right_electrode_lattice,

elements=right_electrode_elements,

cartesian_coordinates=right_electrode_coordinates

)

# -------------------------------------------------------------

# Central Region

# -------------------------------------------------------------

# Set up lattice

vector_a = [25.0, 0.0, 0.0]*Angstrom

vector_b = [0.0, 15.0, 0.0]*Angstrom

vector_c = [0.0, 0.0, 30.167997226]*Angstrom

central_region_lattice = UnitCell(vector_a, vector_b, vector_c)

# Define elements

central_region_elements = [Copper, Copper, Copper, Copper, Copper, Copper, Copper, Copper,

Copper, Copper, Copper, Copper, Copper, Copper, Copper, Copper,

Copper, Copper, Copper, Copper, Copper, Copper, Copper, Copper,

Copper, Copper, Copper, Copper, Copper, Copper, Copper, Copper,

Copper, Copper, Copper, Copper, Copper, Copper, Copper, Copper,

Copper, Copper, Copper, Copper, Copper, Copper, Copper, Copper,

Copper, Copper, Copper, Copper, Copper, Copper, Copper, Copper,

Copper, Copper, Copper, Copper, Copper, Copper, Copper, Copper,

Copper, Copper, Copper, Copper, Copper, Copper, Copper, Copper,

Copper, Copper, Copper, Copper, Copper, Copper, Copper, Copper,

Copper, Copper, Copper, Copper, Copper, Copper, Copper, Copper,

Copper, Copper, Copper, Copper, Copper, Copper, Copper, Copper,

Copper, Copper, Copper, Copper, Copper, Copper, Copper, Copper,

Copper, Copper, Copper, Copper, Copper, Copper, Copper, Copper,

Copper, Copper, Copper, Copper, Copper, Copper, Copper, Copper,

Copper, Copper, Copper, Copper, Copper, Copper, Carbon, Carbon,

Carbon, Carbon, Carbon, Carbon, Carbon, Hydrogen, Carbon, Hydrogen,

Carbon, Hydrogen, Hydrogen, Carbon, Hydrogen, Carbon, Hydrogen,

Carbon, Selenium, Selenium, Carbon, Carbon, Carbon, Carbon, Carbon,

Carbon, Hydrogen, Hydrogen, Hydrogen, Hydrogen, Copper, Copper,

Copper, Copper, Copper, Copper, Copper, Copper, Copper, Copper,

Copper, Copper, Copper, Copper, Copper, Copper, Copper, Copper,

Copper, Copper, Copper, Copper, Copper, Copper, Copper, Copper,

Copper, Copper, Copper, Copper, Copper, Copper, Copper, Copper,

Copper, Copper, Copper, Copper, Copper, Copper, Copper, Copper]

# Define coordinates

central_region_coordinates = [[ 10.6926496004 , 3.88530015845 , 0.9035754 ],

[ 14.3073499204 , 3.88530015845 , 0.9035754 ],

[ 12.4999997604 , 5.69265007845 , 0.9035754 ],

[ 10.6926496004 , 7.50000023845 , 0.9035754 ],

[ 14.3073499204 , 7.50000023845 , 0.9035754 ],

[ 12.4999997604 , 9.30735039845 , 0.9035754 ],

[ 10.6926496004 , 11.11470055845 , 0.9035754 ],

[ 14.3073499204 , 11.11470055845 , 0.9035754 ],

[ 12.4999997604 , 3.88530015845 , 2.71092556 ],

[ 10.6926496004 , 5.69265007845 , 2.71092556 ],

[ 14.3073499204 , 5.69265007845 , 2.71092556 ],

[ 12.4999997604 , 7.50000023845 , 2.71092556 ],

[ 10.6926496004 , 9.30735039845 , 2.71092556 ],

[ 14.3073499204 , 9.30735039845 , 2.71092556 ],

[ 12.4999997604 , 11.11470055845 , 2.71092556 ],

[ 10.6926496004 , 3.88530015845 , 4.51827571 ],

[ 14.3073499204 , 3.88530015845 , 4.51827571 ],

[ 12.4999997604 , 5.69265007845 , 4.51827571 ],

[ 10.6926496004 , 7.50000023845 , 4.51827571 ],

[ 14.3073499204 , 7.50000023845 , 4.51827571 ],

[ 12.4999997604 , 9.30735039845 , 4.51827571 ],

[ 10.6926496004 , 11.11470055845 , 4.51827571 ],

[ 14.3073499204 , 11.11470055845 , 4.51827571 ],

[ 12.4999997604 , 3.88530015845 , 6.32562587 ],

[ 10.6926496004 , 5.69265007845 , 6.32562587 ],

[ 14.3073499204 , 5.69265007845 , 6.32562587 ],

[ 12.4999997604 , 7.50000023845 , 6.32562587 ],

[ 10.6926496004 , 9.30735039845 , 6.32562587 ],

[ 14.3073499204 , 9.30735039845 , 6.32562587 ],

[ 12.4999997604 , 11.11470055845 , 6.32562587 ],

[ 3.5799309611 , 11.55716919905 , 8.3275264587 ],

[ 15.0424889922 , 9.34946560865 , 8.3295253601 ],

[ 8.6729840636 , 11.56228852275 , 8.3295253601 ],

[ 11.2219085097 , 11.56317830085 , 8.3295253601 ],

[ 12.4971389175 , 9.34840607645 , 8.3305267181 ],

[ 6.1268658042 , 11.56008839615 , 8.3305267181 ],

[ 7.4030150771 , 9.34725880625 , 8.3315261688 ],

[ 2.3047119975 , 9.34911274915 , 8.3315261688 ],

[ 18.8709697127 , 11.55831837655 , 8.3315261688 ],

[ 13.7716493011 , 11.56228852275 , 8.3315261688 ],

[ 9.9510316253 , 4.93961262705 , 8.3325256195 ],

[ 4.8561820388 , 9.34734654425 , 8.3325256195 ],

[ 17.592489183 , 9.34955334665 , 8.3325256195 ],

[ 20.1437987685 , 9.35052514075 , 8.3325256195 ],

[ 16.3206691146 , 11.55911850935 , 8.3325256195 ],

[ 1.0331498981 , 11.55964875225 , 8.3325256195 ],

[ 9.9480122924 , 9.34611058235 , 8.3335269775 ],

[ 22.6923789382 , 4.93696475035 , 8.3345264282 ],

[ 4.8549208045 , 4.93731760985 , 8.3345264282 ],

[ 7.4022120833 , 4.93996596335 , 8.3345264282 ],

[ 3.5815238357 , 7.14255261425 , 8.3345264282 ],

[ 20.1435584426 , 4.93908381465 , 8.3355258789 ],

[ 17.5950984359 , 4.94058394435 , 8.3355258789 ],

[ 6.1295790076 , 7.14211153985 , 8.3355258789 ],

[ 18.8674086928 , 7.14202284815 , 8.3365253296 ],

[ 12.4989890456 , 4.94323277475 , 8.3375266876 ],

[ 15.0471991897 , 4.94393897055 , 8.3375266876 ],

[ 21.4148597121 , 7.14193463325 , 8.3375266876 ],

[ 8.6792153716 , 7.14105153085 , 8.339525589 ],

[ 11.2287492156 , 7.14193463325 , 8.339525589 ],

[ 16.3195590377 , 7.14069867135 , 8.3435252991 ],

[ 13.7724189162 , 7.14131665235 , 8.3445266571 ],

[ 9.9445418716 , 10.81861901285 , 10.3835281219 ],

[ 12.4942788482 , 10.82444882395 , 10.3865283813 ],

[ 7.3989838958 , 10.81438851355 , 10.3915275421 ],

[ 8.6754521728 , 4.19232296945 , 10.3925289001 ],

[ 15.0467690826 , 10.82656884195 , 10.3935283508 ],

[ 4.85342592 , 10.81367897995 , 10.3955272522 ],

[ 18.8749980331 , 8.61868405345 , 10.4005283203 ],

[ 17.6007880569 , 10.82532906535 , 10.4005283203 ],

[ 2.3080720305 , 10.81685853005 , 10.401527771 ],

[ 11.2252387404 , 4.20123887065 , 10.4035285797 ],

[ 16.3124694228 , 8.61912465095 , 10.4035285797 ],

[ 20.1508292556 , 10.82391858105 , 10.4035285797 ],

[ 3.5782069564 , 8.61162114145 , 10.4045280304 ],

[ 13.7743186355 , 4.20750689505 , 10.4065288391 ],

[ 22.6971186996 , 6.40797495845 , 10.4075282898 ],

[ 6.1288227439 , 4.20088553435 , 10.4085277405 ],

[ 23.9680690169 , 4.20097374915 , 10.4085277405 ],

[ 16.3220691085 , 4.20865464215 , 10.4085277405 ],

[ 21.4198493362 , 8.61426949505 , 10.4085277405 ],

[ 21.420368135 , 4.20397591595 , 10.4095290985 ],

[ 4.8575667739 , 6.40488457685 , 10.4125274506 ],

[ 6.1290659308 , 8.60738396645 , 10.4125274506 ],

[ 11.2245187163 , 8.61117959025 , 10.4125274506 ],

[ 13.7693585753 , 8.61524033545 , 10.4135288086 ],

[ 18.8718585372 , 4.20768380165 , 10.4145282593 ],

[ 8.6706475616 , 8.60508751875 , 10.4185279694 ],

[ 9.9620370269 , 6.40717959405 , 10.4205287781 ],

[ 7.4011368156 , 6.41044688225 , 10.4205287781 ],

[ 20.141158998 , 6.40656256675 , 10.4235290375 ],

[ 17.5994796157 , 6.40444350245 , 10.4285281982 ],

[ 15.0432690978 , 6.41159367565 , 10.4465278473 ],

[ 12.5025491118 , 6.41097664835 , 10.448528656 ],

[ 8.6872720122 , 5.64647078515 , 12.4315284576 ],

[ 17.5970286727 , 7.91191363335 , 12.434528717 ],

[ 12.503269136 , 3.43682169915 , 12.4465278473 ],

[ 13.7715491653 , 10.12773919105 , 12.447527298 ],

[ 15.0574387908 , 3.44732785225 , 12.448528656 ],

[ 11.2188491225 , 10.11361908915 , 12.4495281067 ],

[ 9.947875917 , 3.44538474085 , 12.4565280762 ],

[ 16.3248996139 , 10.11529850965 , 12.4595283356 ],

[ 8.6783398986 , 10.09710907935 , 12.4635280457 ],

[ 17.5960196853 , 3.46613073355 , 12.4665283051 ],

[ 7.4027771354 , 3.45624375345 , 12.4695285645 ],

[ 18.8733691573 , 10.10107827185 , 12.4715274658 ],

[ 6.1242699027 , 10.09066891675 , 12.4725288239 ],

[ 4.8411001563 , 7.87766051295 , 12.4795287933 ],

[ 9.9422063232 , 7.89178586005 , 12.4795287933 ],

[ 20.1558493972 , 3.46966171265 , 12.480528244 ],

[ 20.1448783279 , 7.89063763625 , 12.4815276947 ],

[ 3.5783550143 , 10.08351826675 , 12.4835285034 ],

[ 21.4328498244 , 5.67675185205 , 12.4845279541 ],

[ 1.0319309831 , 10.08924889565 , 12.4845279541 ],

[ 4.8559951186 , 3.46613073355 , 12.4865287628 ],

[ 2.3037478328 , 7.88110375405 , 12.4875282135 ],

[ 3.5876440406 , 5.67321991925 , 12.4885276642 ],

[ 22.6995696425 , 3.47213363655 , 12.4895290222 ],

[ 6.1311640143 , 5.66333270075 , 12.4895290222 ],

[ 11.2323693633 , 5.64161562925 , 12.4905284729 ],

[ 15.0495786071 , 7.92506670955 , 12.4905284729 ],

[ 16.3312396407 , 5.66633391385 , 12.4955276337 ],

[ 12.4942387939 , 7.92612671855 , 12.4975284424 ],

[ 7.3850778937 , 7.88640093805 , 12.5115283813 ],

[ 13.782109201 , 5.64143872265 , 12.5155280914 ],

[ 18.8853091598 , 5.66854071625 , 12.5215286102 ],

[ 12.9113587737 , 8.13729310035 , 14.6945289459 ],

[ 13.0834893584 , 5.30659270285 , 14.7055286255 ],

[ 14.2906188369 , 6.06438851355 , 14.7895282593 ],

[ 14.2116689086 , 7.51756691935 , 14.8045276489 ],

[ 11.7043790221 , 7.37817263605 , 14.8075279083 ],

[ 11.7805384994 , 5.92631888395 , 14.8165286865 ],

[ 15.5819491744 , 5.43795371055 , 14.8685287323 ],

[ 13.1451587081 , 4.23010659225 , 14.8795284119 ],

[ 10.417589128 , 8.00381302835 , 14.8825286713 ],

[ 12.8526391387 , 9.21148419385 , 14.8825286713 ],

[ 15.3983086944 , 8.28154206275 , 14.9235290375 ],

[ 15.6352185607 , 4.35131478315 , 14.9445289459 ],

[ 10.3650893569 , 9.09159970285 , 14.948528656 ],

[ 10.596439302 , 5.16322684295 , 14.9615272369 ],

[ 15.3206786513 , 9.36659169205 , 15.012527832 ],

[ 16.7231788039 , 6.23574090005 , 15.0285285797 ],

[ 10.6747292876 , 4.07702851295 , 15.0385288086 ],

[ 9.2784489989 , 7.20770382885 , 15.0655273285 ],

[ 18.5574797988 , 5.63216996195 , 15.0765289154 ],

[ 7.4520000815 , 7.82098460205 , 15.0765289154 ],

[ 16.6632880569 , 7.65307688715 , 15.0855277863 ],

[ 9.33115381 , 5.79116177565 , 15.1165279236 ],

[ 17.938159883 , 8.30096364025 , 15.2335285034 ],

[ 8.0496606231 , 5.14910197265 , 15.2535289612 ],

[ 6.9623531699 , 5.97760987285 , 15.2735275116 ],

[ 19.0282687545 , 7.47607493405 , 15.2755283203 ],

[ 18.033359468 , 9.38680768015 , 15.2845290985 ],

[ 7.9491547942 , 4.06396365165 , 15.3125289764 ],

[ 20.0781096816 , 7.74285674095 , 15.3655284729 ],

[ 5.9118980765 , 5.71859574325 , 15.3735278931 ],

[ 12.5226 , 9.290139960267, 18.4203265991 ],

[ 12.5226 , 7.482789801567, 20.2276767578 ],

[ 10.7152498413 , 9.290139960267, 20.2276767578 ],

[ 14.3299501587 , 9.290139960267, 20.2276767578 ],

[ 12.5226 , 11.097490118967, 20.2276767578 ],

[ 12.5226 , 5.675439881267, 22.0350269165 ],

[ 10.7152498413 , 7.482789801567, 22.0350269165 ],

[ 14.3299501587 , 7.482789801567, 22.0350269165 ],

[ 12.5226 , 9.290139960267, 22.0350269165 ],

[ 10.7152498413 , 11.097490118967, 22.0350269165 ],

[ 14.3299501587 , 11.097490118967, 22.0350269165 ],

[ 12.5226 , 12.904840277667, 22.0350269165 ],

[ 10.7152498413 , 5.675439881267, 23.8423770752 ],

[ 14.3299501587 , 5.675439881267, 23.8423770752 ],

[ 12.5226 , 7.482789801567, 23.8423770752 ],

[ 10.7152498413 , 9.290139960267, 23.8423770752 ],

[ 14.3299501587 , 9.290139960267, 23.8423770752 ],

[ 12.5226 , 11.097490118967, 23.8423770752 ],

[ 10.7152498413 , 12.904840277667, 23.8423770752 ],

[ 14.3299501587 , 12.904840277667, 23.8423770752 ],

[ 12.5226 , 5.675439881267, 25.6497272339 ],

[ 10.7152498413 , 7.482789801567, 25.6497272339 ],

[ 14.3299501587 , 7.482789801567, 25.6497272339 ],

[ 12.5226 , 9.290139960267, 25.6497272339 ],

[ 10.7152498413 , 11.097490118967, 25.6497272339 ],

[ 14.3299501587 , 11.097490118967, 25.6497272339 ],

[ 12.5226 , 12.904840277667, 25.6497272339 ],

[ 10.7152498413 , 5.675439881267, 27.4570773926 ],

[ 14.3299501587 , 5.675439881267, 27.4570773926 ],

[ 12.5226 , 7.482789801567, 27.4570773926 ],

[ 10.7152498413 , 9.290139960267, 27.4570773926 ],

[ 14.3299501587 , 9.290139960267, 27.4570773926 ],

[ 12.5226 , 11.097490118967, 27.4570773926 ],

[ 10.7152498413 , 12.904840277667, 27.4570773926 ],

[ 14.3299501587 , 12.904840277667, 27.4570773926 ],

[ 12.5226 , 5.675439881267, 29.2644275513 ],

[ 10.7152498413 , 7.482789801567, 29.2644275513 ],

[ 14.3299501587 , 7.482789801567, 29.2644275513 ],

[ 12.5226 , 9.290139960267, 29.2644275513 ],

[ 10.7152498413 , 11.097490118967, 29.2644275513 ],

[ 14.3299501587 , 11.097490118967, 29.2644275513 ],

[ 12.5226 , 12.904840277667, 29.2644275513 ]]*Angstrom

# Set up configuration

central_region = BulkConfiguration(

bravais_lattice=central_region_lattice,

elements=central_region_elements,

cartesian_coordinates=central_region_coordinates

)

device_configuration = DeviceConfiguration(

central_region,

[left_electrode, right_electrode],

equivalent_electrode_lengths=[7.22940064, 7.2293930054]*Angstrom,

transverse_electrode_repetitions=[[1, 1], [1, 1]],

)

# -------------------------------------------------------------

# Calculator

# -------------------------------------------------------------

#----------------------------------------

# Basis Set

#----------------------------------------

basis_set = [

GGABasis.Hydrogen_DoubleZetaPolarized,

GGABasis.Carbon_DoubleZetaPolarized,

GGABasis.Copper_DoubleZetaPolarized,

GGABasis.Selenium_DoubleZetaPolarized,

]

#----------------------------------------

# Numerical Accuracy Settings

#----------------------------------------

device_k_point_sampling = MonkhorstPackGrid(

na=2,

nc=261,

)

device_numerical_accuracy_parameters = NumericalAccuracyParameters(

density_mesh_cutoff=100.0*Hartree,

k_point_sampling=device_k_point_sampling,

)

#----------------------------------------

# Contour Integral Settings

#----------------------------------------

equilibrium_contour = SemiCircleContour(

integral_lower_bound=1.84481605655*Hartree,

circle_points=30,

)

contour_parameters = ContourParameters(

equilibrium_contour=equilibrium_contour,

)

#----------------------------------------

# Device Calculator

#----------------------------------------

calculator = DeviceLCAOCalculator(

basis_set=basis_set,

numerical_accuracy_parameters=device_numerical_accuracy_parameters,

contour_parameters=contour_parameters,

)

device_configuration.setCalculator(calculator)

nlprint(device_configuration)

nlsave('chem-Cu-ADS-Cu-t1-012-012-012-new2020.hdf5', device_configuration)

# -------------------------------------------------------------

# IV Characteristics

# -------------------------------------------------------------

# Kpoint sampling

kpoint_grid = KpointDensity(

density_a=7.0*Angstrom,

density_b=2.38732414638*Angstrom,

density_c=0.0*Angstrom,

)

# Gate-source voltages

gate_source_voltages = numpy.linspace(0, 0, 1)*Volt

# Drain-source voltages

drain_source_voltages = numpy.linspace(-0.12, 0.12, 7)*Volt

# File name.

filename = 'chem-Cu-ADS-Cu-t1-012-012-012-new2020.hdf5'

iv_characteristics = IVCharacteristics(

configuration=device_configuration,

filename=filename,

object_id='ivcharacteristics',

gate_regions=[],

gate_source_voltages=gate_source_voltages,

drain_source_voltages=drain_source_voltages,

energies=None,

kpoints=kpoint_grid,

self_energy_calculator=RecursionSelfEnergy(),

energy_zero_parameter=AverageFermiLevel,

infinitesimal=1e-06*eV,

log_filename_prefix='ivcharacteristics_',

number_of_processes_per_task=None,

enforce_zero_transmission_in_band_gap=True,

)

iv_characteristics.update()

**phys-Cu-ADS-Cu-*t*2.py**

# -*- coding: utf-8 -*-

# -------------------------------------------------------------

# Two-probe Configuration

# -------------------------------------------------------------

# -------------------------------------------------------------

# Left Electrode

# -------------------------------------------------------------

# Set up lattice

vector_a = [25.0, 0.0, 0.0]*Angstrom

vector_b = [0.0, 15.0, 0.0]*Angstrom

vector_c = [0.0, 0.0, 3.61470032]*Angstrom

left_electrode_lattice = UnitCell(vector_a, vector_b, vector_c)

# Define elements

left_electrode_elements = [Copper, Copper, Copper, Copper, Copper, Copper, Copper, Copper,

Copper, Copper, Copper, Copper, Copper, Copper, Copper]

# Define coordinates

left_electrode_coordinates = [[ 10.6926496004 , 3.88530015845, 0.9035754 ],

[ 14.3073499204 , 3.88530015845, 0.9035754 ],

[ 12.4999997604 , 5.69265007845, 0.9035754 ],

[ 10.6926496004 , 7.50000023845, 0.9035754 ],

[ 14.3073499204 , 7.50000023845, 0.9035754 ],

[ 12.4999997604 , 9.30735039845, 0.9035754 ],

[ 10.6926496004 , 11.11470055845, 0.9035754 ],

[ 14.3073499204 , 11.11470055845, 0.9035754 ],

[ 12.4999997604 , 3.88530015845, 2.71092556 ],

[ 10.6926496004 , 5.69265007845, 2.71092556 ],

[ 14.3073499204 , 5.69265007845, 2.71092556 ],

[ 12.4999997604 , 7.50000023845, 2.71092556 ],

[ 10.6926496004 , 9.30735039845, 2.71092556 ],

[ 14.3073499204 , 9.30735039845, 2.71092556 ],

[ 12.4999997604 , 11.11470055845, 2.71092556 ]]*Angstrom

# Set up configuration

left_electrode = BulkConfiguration(

bravais_lattice=left_electrode_lattice,

elements=left_electrode_elements,

cartesian_coordinates=left_electrode_coordinates

)

# -------------------------------------------------------------

# Right Electrode

# -------------------------------------------------------------

# Set up lattice

vector_a = [25.0, 0.0, 0.0]*Angstrom

vector_b = [0.0, 15.0, 0.0]*Angstrom

vector_c = [0.0, 0.0, 3.6146965027]*Angstrom

right_electrode_lattice = UnitCell(vector_a, vector_b, vector_c)

# Define elements

right_electrode_elements = [Copper, Copper, Copper, Copper, Copper, Copper, Copper, Copper,

Copper, Copper, Copper, Copper, Copper, Copper, Copper]

# Define coordinates

right_electrode_coordinates = [[ 9.8970498413 , 3.763469881267, 0.9037728546 ],

[ 13.5117501587 , 3.763469881267, 0.9037728546 ],

[ 11.7044 , 5.570819801567, 0.9037728546 ],

[ 9.8970498413 , 7.378169960267, 0.9037728546 ],

[ 13.5117501587 , 7.378169960267, 0.9037728546 ],

[ 11.7044 , 9.185520118967, 0.9037728546 ],

[ 9.8970498413 , 10.992870277667, 0.9037728546 ],

[ 13.5117501587 , 10.992870277667, 0.9037728546 ],

[ 11.7044 , 3.763469881267, 2.7111230133 ],

[ 9.8970498413 , 5.570819801567, 2.7111230133 ],

[ 13.5117501587 , 5.570819801567, 2.7111230133 ],

[ 11.7044 , 7.378169960267, 2.7111230133 ],

[ 9.8970498413 , 9.185520118967, 2.7111230133 ],

[ 13.5117501587 , 9.185520118967, 2.7111230133 ],

[ 11.7044 , 10.992870277667, 2.7111230133 ]]*Angstrom

# Set up configuration

right_electrode = BulkConfiguration(

bravais_lattice=right_electrode_lattice,

elements=right_electrode_elements,

cartesian_coordinates=right_electrode_coordinates

)

# -------------------------------------------------------------

# Central Region

# -------------------------------------------------------------

# Set up lattice

vector_a = [25.0, 0.0, 0.0]*Angstrom

vector_b = [0.0, 15.0, 0.0]*Angstrom

vector_c = [0.0, 0.0, 30.167997226]*Angstrom

central_region_lattice = UnitCell(vector_a, vector_b, vector_c)

# Define elements

central_region_elements = [Copper, Copper, Copper, Copper, Copper, Copper, Copper, Copper,

Copper, Copper, Copper, Copper, Copper, Copper, Copper, Copper,

Copper, Copper, Copper, Copper, Copper, Copper, Copper, Copper,

Copper, Copper, Copper, Copper, Copper, Copper, Copper, Copper,

Copper, Copper, Copper, Copper, Copper, Copper, Copper, Copper,

Copper, Copper, Copper, Copper, Copper, Copper, Copper, Copper,

Copper, Copper, Copper, Copper, Copper, Copper, Copper, Copper,

Copper, Copper, Copper, Copper, Copper, Copper, Copper, Copper,

Copper, Copper, Copper, Copper, Copper, Copper, Copper, Copper,

Copper, Copper, Copper, Copper, Copper, Copper, Copper, Copper,

Copper, Copper, Copper, Copper, Copper, Copper, Copper, Copper,

Copper, Copper, Copper, Copper, Copper, Copper, Copper, Copper,

Copper, Copper, Copper, Copper, Copper, Copper, Copper, Copper,

Copper, Copper, Copper, Copper, Copper, Copper, Copper, Copper,

Copper, Copper, Copper, Copper, Copper, Copper, Copper, Copper,

Copper, Copper, Copper, Copper, Copper, Copper, Carbon, Carbon,

Carbon, Carbon, Carbon, Carbon, Carbon, Hydrogen, Carbon, Hydrogen,

Carbon, Hydrogen, Hydrogen, Carbon, Hydrogen, Carbon, Hydrogen,

Carbon, Selenium, Selenium, Carbon, Carbon, Carbon, Carbon, Carbon,

Carbon, Hydrogen, Hydrogen, Hydrogen, Hydrogen, Copper, Copper,

Copper, Copper, Copper, Copper, Copper, Copper, Copper, Copper,

Copper, Copper, Copper, Copper, Copper, Copper, Copper, Copper,

Copper, Copper, Copper, Copper, Copper, Copper, Copper, Copper,

Copper, Copper, Copper, Copper, Copper, Copper, Copper, Copper,

Copper, Copper, Copper, Copper, Copper, Copper, Copper, Copper]

# Define coordinates

central_region_coordinates = [[ 10.6926496004 , 3.88530015845 , 0.9035754 ],

[ 14.3073499204 , 3.88530015845 , 0.9035754 ],

[ 12.4999997604 , 5.69265007845 , 0.9035754 ],

[ 10.6926496004 , 7.50000023845 , 0.9035754 ],

[ 14.3073499204 , 7.50000023845 , 0.9035754 ],

[ 12.4999997604 , 9.30735039845 , 0.9035754 ],

[ 10.6926496004 , 11.11470055845 , 0.9035754 ],

[ 14.3073499204 , 11.11470055845 , 0.9035754 ],

[ 12.4999997604 , 3.88530015845 , 2.71092556 ],

[ 10.6926496004 , 5.69265007845 , 2.71092556 ],

[ 14.3073499204 , 5.69265007845 , 2.71092556 ],

[ 12.4999997604 , 7.50000023845 , 2.71092556 ],

[ 10.6926496004 , 9.30735039845 , 2.71092556 ],

[ 14.3073499204 , 9.30735039845 , 2.71092556 ],

[ 12.4999997604 , 11.11470055845 , 2.71092556 ],

[ 10.6926496004 , 3.88530015845 , 4.51827571 ],

[ 14.3073499204 , 3.88530015845 , 4.51827571 ],

[ 12.4999997604 , 5.69265007845 , 4.51827571 ],

[ 10.6926496004 , 7.50000023845 , 4.51827571 ],

[ 14.3073499204 , 7.50000023845 , 4.51827571 ],

[ 12.4999997604 , 9.30735039845 , 4.51827571 ],

[ 10.6926496004 , 11.11470055845 , 4.51827571 ],

[ 14.3073499204 , 11.11470055845 , 4.51827571 ],

[ 12.4999997604 , 3.88530015845 , 6.32562587 ],

[ 10.6926496004 , 5.69265007845 , 6.32562587 ],

[ 14.3073499204 , 5.69265007845 , 6.32562587 ],

[ 12.4999997604 , 7.50000023845 , 6.32562587 ],

[ 10.6926496004 , 9.30735039845 , 6.32562587 ],

[ 14.3073499204 , 9.30735039845 , 6.32562587 ],

[ 12.4999997604 , 11.11470055845 , 6.32562587 ],

[ 3.5799309611 , 11.55716919905 , 8.3275264587 ],

[ 15.0424889922 , 9.34946560865 , 8.3295253601 ],

[ 8.6729840636 , 11.56228852275 , 8.3295253601 ],

[ 11.2219085097 , 11.56317830085 , 8.3295253601 ],

[ 12.4971389175 , 9.34840607645 , 8.3305267181 ],

[ 6.1268658042 , 11.56008839615 , 8.3305267181 ],

[ 7.4030150771 , 9.34725880625 , 8.3315261688 ],

[ 2.3047119975 , 9.34911274915 , 8.3315261688 ],

[ 18.8709697127 , 11.55831837655 , 8.3315261688 ],

[ 13.7716493011 , 11.56228852275 , 8.3315261688 ],

[ 9.9510316253 , 4.93961262705 , 8.3325256195 ],

[ 4.8561820388 , 9.34734654425 , 8.3325256195 ],

[ 17.592489183 , 9.34955334665 , 8.3325256195 ],

[ 20.1437987685 , 9.35052514075 , 8.3325256195 ],

[ 16.3206691146 , 11.55911850935 , 8.3325256195 ],

[ 1.0331498981 , 11.55964875225 , 8.3325256195 ],

[ 9.9480122924 , 9.34611058235 , 8.3335269775 ],

[ 22.6923789382 , 4.93696475035 , 8.3345264282 ],

[ 4.8549208045 , 4.93731760985 , 8.3345264282 ],

[ 7.4022120833 , 4.93996596335 , 8.3345264282 ],

[ 3.5815238357 , 7.14255261425 , 8.3345264282 ],

[ 20.1435584426 , 4.93908381465 , 8.3355258789 ],

[ 17.5950984359 , 4.94058394435 , 8.3355258789 ],

[ 6.1295790076 , 7.14211153985 , 8.3355258789 ],

[ 18.8674086928 , 7.14202284815 , 8.3365253296 ],

[ 12.4989890456 , 4.94323277475 , 8.3375266876 ],

[ 15.0471991897 , 4.94393897055 , 8.3375266876 ],

[ 21.4148597121 , 7.14193463325 , 8.3375266876 ],

[ 8.6792153716 , 7.14105153085 , 8.339525589 ],

[ 11.2287492156 , 7.14193463325 , 8.339525589 ],

[ 16.3195590377 , 7.14069867135 , 8.3435252991 ],

[ 13.7724189162 , 7.14131665235 , 8.3445266571 ],

[ 9.9445418716 , 10.81861901285 , 10.3835281219 ],

[ 12.4942788482 , 10.82444882395 , 10.3865283813 ],

[ 7.3989838958 , 10.81438851355 , 10.3915275421 ],

[ 8.6754521728 , 4.19232296945 , 10.3925289001 ],

[ 15.0467690826 , 10.82656884195 , 10.3935283508 ],

[ 4.85342592 , 10.81367897995 , 10.3955272522 ],

[ 18.8749980331 , 8.61868405345 , 10.4005283203 ],

[ 17.6007880569 , 10.82532906535 , 10.4005283203 ],

[ 2.3080720305 , 10.81685853005 , 10.401527771 ],

[ 11.2252387404 , 4.20123887065 , 10.4035285797 ],

[ 16.3124694228 , 8.61912465095 , 10.4035285797 ],

[ 20.1508292556 , 10.82391858105 , 10.4035285797 ],

[ 3.5782069564 , 8.61162114145 , 10.4045280304 ],

[ 13.7743186355 , 4.20750689505 , 10.4065288391 ],

[ 22.6971186996 , 6.40797495845 , 10.4075282898 ],

[ 6.1288227439 , 4.20088553435 , 10.4085277405 ],

[ 23.9680690169 , 4.20097374915 , 10.4085277405 ],

[ 16.3220691085 , 4.20865464215 , 10.4085277405 ],

[ 21.4198493362 , 8.61426949505 , 10.4085277405 ],

[ 21.420368135 , 4.20397591595 , 10.4095290985 ],

[ 4.8575667739 , 6.40488457685 , 10.4125274506 ],

[ 6.1290659308 , 8.60738396645 , 10.4125274506 ],

[ 11.2245187163 , 8.61117959025 , 10.4125274506 ],

[ 13.7693585753 , 8.61524033545 , 10.4135288086 ],

[ 18.8718585372 , 4.20768380165 , 10.4145282593 ],

[ 8.6706475616 , 8.60508751875 , 10.4185279694 ],

[ 9.9620370269 , 6.40717959405 , 10.4205287781 ],

[ 7.4011368156 , 6.41044688225 , 10.4205287781 ],

[ 20.141158998 , 6.40656256675 , 10.4235290375 ],

[ 17.5994796157 , 6.40444350245 , 10.4285281982 ],

[ 15.0432690978 , 6.41159367565 , 10.4465278473 ],

[ 12.5025491118 , 6.41097664835 , 10.448528656 ],

[ 8.6872720122 , 5.64647078515 , 12.4315284576 ],

[ 17.5970286727 , 7.91191363335 , 12.434528717 ],

[ 12.503269136 , 3.43682169915 , 12.4465278473 ],

[ 13.7715491653 , 10.12773919105 , 12.447527298 ],

[ 15.0574387908 , 3.44732785225 , 12.448528656 ],

[ 11.2188491225 , 10.11361908915 , 12.4495281067 ],

[ 9.947875917 , 3.44538474085 , 12.4565280762 ],

[ 16.3248996139 , 10.11529850965 , 12.4595283356 ],

[ 8.6783398986 , 10.09710907935 , 12.4635280457 ],

[ 17.5960196853 , 3.46613073355 , 12.4665283051 ],

[ 7.4027771354 , 3.45624375345 , 12.4695285645 ],

[ 18.8733691573 , 10.10107827185 , 12.4715274658 ],

[ 6.1242699027 , 10.09066891675 , 12.4725288239 ],

[ 4.8411001563 , 7.87766051295 , 12.4795287933 ],

[ 9.9422063232 , 7.89178586005 , 12.4795287933 ],

[ 20.1558493972 , 3.46966171265 , 12.480528244 ],

[ 20.1448783279 , 7.89063763625 , 12.4815276947 ],

[ 3.5783550143 , 10.08351826675 , 12.4835285034 ],

[ 21.4328498244 , 5.67675185205 , 12.4845279541 ],

[ 1.0319309831 , 10.08924889565 , 12.4845279541 ],

[ 4.8559951186 , 3.46613073355 , 12.4865287628 ],

[ 2.3037478328 , 7.88110375405 , 12.4875282135 ],

[ 3.5876440406 , 5.67321991925 , 12.4885276642 ],

[ 22.6995696425 , 3.47213363655 , 12.4895290222 ],

[ 6.1311640143 , 5.66333270075 , 12.4895290222 ],

[ 11.2323693633 , 5.64161562925 , 12.4905284729 ],

[ 15.0495786071 , 7.92506670955 , 12.4905284729 ],

[ 16.3312396407 , 5.66633391385 , 12.4955276337 ],

[ 12.4942387939 , 7.92612671855 , 12.4975284424 ],

[ 7.3850778937 , 7.88640093805 , 12.5115283813 ],

[ 13.782109201 , 5.64143872265 , 12.5155280914 ],

[ 18.8853091598 , 5.66854071625 , 12.5215286102 ],

[ 12.9113587737 , 8.13729310035 , 14.6945289459 ],

[ 13.0834893584 , 5.30659270285 , 14.7055286255 ],

[ 14.2906188369 , 6.06438851355 , 14.7895282593 ],

[ 14.2116689086 , 7.51756691935 , 14.8045276489 ],

[ 11.7043790221 , 7.37817263605 , 14.8075279083 ],

[ 11.7805384994 , 5.92631888395 , 14.8165286865 ],

[ 15.5819491744 , 5.43795371055 , 14.8685287323 ],

[ 13.1451587081 , 4.23010659225 , 14.8795284119 ],

[ 10.417589128 , 8.00381302835 , 14.8825286713 ],

[ 12.8526391387 , 9.21148419385 , 14.8825286713 ],

[ 15.3983086944 , 8.28154206275 , 14.9235290375 ],

[ 15.6352185607 , 4.35131478315 , 14.9445289459 ],

[ 10.3650893569 , 9.09159970285 , 14.948528656 ],

[ 10.596439302 , 5.16322684295 , 14.9615272369 ],

[ 15.3206786513 , 9.36659169205 , 15.012527832 ],

[ 16.7231788039 , 6.23574090005 , 15.0285285797 ],

[ 10.6747292876 , 4.07702851295 , 15.0385288086 ],

[ 9.2784489989 , 7.20770382885 , 15.0655273285 ],

[ 18.5574797988 , 5.63216996195 , 15.0765289154 ],

[ 7.4520000815 , 7.82098460205 , 15.0765289154 ],

[ 16.6632880569 , 7.65307688715 , 15.0855277863 ],

[ 9.33115381 , 5.79116177565 , 15.1165279236 ],

[ 17.938159883 , 8.30096364025 , 15.2335285034 ],

[ 8.0496606231 , 5.14910197265 , 15.2535289612 ],

[ 6.9623531699 , 5.97760987285 , 15.2735275116 ],

[ 19.0282687545 , 7.47607493405 , 15.2755283203 ],

[ 18.033359468 , 9.38680768015 , 15.2845290985 ],

[ 7.9491547942 , 4.06396365165 , 15.3125289764 ],

[ 20.0781096816 , 7.74285674095 , 15.3655284729 ],

[ 5.9118980765 , 5.71859574325 , 15.3735278931 ],

[ 11.7044 , 7.378169960267, 18.4203265991 ],

[ 11.7044 , 5.570819801567, 20.2276767578 ],

[ 9.8970498413 , 7.378169960267, 20.2276767578 ],

[ 13.5117501587 , 7.378169960267, 20.2276767578 ],

[ 11.7044 , 9.185520118967, 20.2276767578 ],

[ 11.7044 , 3.763469881267, 22.0350269165 ],

[ 9.8970498413 , 5.570819801567, 22.0350269165 ],

[ 13.5117501587 , 5.570819801567, 22.0350269165 ],

[ 11.7044 , 7.378169960267, 22.0350269165 ],

[ 9.8970498413 , 9.185520118967, 22.0350269165 ],

[ 13.5117501587 , 9.185520118967, 22.0350269165 ],

[ 11.7044 , 10.992870277667, 22.0350269165 ],

[ 9.8970498413 , 3.763469881267, 23.8423770752 ],

[ 13.5117501587 , 3.763469881267, 23.8423770752 ],

[ 11.7044 , 5.570819801567, 23.8423770752 ],

[ 9.8970498413 , 7.378169960267, 23.8423770752 ],

[ 13.5117501587 , 7.378169960267, 23.8423770752 ],

[ 11.7044 , 9.185520118967, 23.8423770752 ],

[ 9.8970498413 , 10.992870277667, 23.8423770752 ],

[ 13.5117501587 , 10.992870277667, 23.8423770752 ],

[ 11.7044 , 3.763469881267, 25.6497272339 ],

[ 9.8970498413 , 5.570819801567, 25.6497272339 ],

[ 13.5117501587 , 5.570819801567, 25.6497272339 ],

[ 11.7044 , 7.378169960267, 25.6497272339 ],

[ 9.8970498413 , 9.185520118967, 25.6497272339 ],

[ 13.5117501587 , 9.185520118967, 25.6497272339 ],

[ 11.7044 , 10.992870277667, 25.6497272339 ],

[ 9.8970498413 , 3.763469881267, 27.4570773926 ],

[ 13.5117501587 , 3.763469881267, 27.4570773926 ],

[ 11.7044 , 5.570819801567, 27.4570773926 ],

[ 9.8970498413 , 7.378169960267, 27.4570773926 ],

[ 13.5117501587 , 7.378169960267, 27.4570773926 ],

[ 11.7044 , 9.185520118967, 27.4570773926 ],

[ 9.8970498413 , 10.992870277667, 27.4570773926 ],

[ 13.5117501587 , 10.992870277667, 27.4570773926 ],

[ 11.7044 , 3.763469881267, 29.2644275513 ],

[ 9.8970498413 , 5.570819801567, 29.2644275513 ],

[ 13.5117501587 , 5.570819801567, 29.2644275513 ],

[ 11.7044 , 7.378169960267, 29.2644275513 ],

[ 9.8970498413 , 9.185520118967, 29.2644275513 ],

[ 13.5117501587 , 9.185520118967, 29.2644275513 ],

[ 11.7044 , 10.992870277667, 29.2644275513 ]]*Angstrom

# Set up configuration

central_region = BulkConfiguration(

bravais_lattice=central_region_lattice,

elements=central_region_elements,

cartesian_coordinates=central_region_coordinates

)

device_configuration = DeviceConfiguration(

central_region,

[left_electrode, right_electrode],

equivalent_electrode_lengths=[7.22940064, 7.2293930054]*Angstrom,

transverse_electrode_repetitions=[[1, 1], [1, 1]],

)

# -------------------------------------------------------------

# Calculator

# -------------------------------------------------------------

#----------------------------------------

# Basis Set

#----------------------------------------

basis_set = [

GGABasis.Hydrogen_DoubleZetaPolarized,

GGABasis.Carbon_DoubleZetaPolarized,

GGABasis.Copper_DoubleZetaPolarized,

GGABasis.Selenium_DoubleZetaPolarized,

]

#----------------------------------------

# Numerical Accuracy Settings

#----------------------------------------

device_k_point_sampling = MonkhorstPackGrid(

na=2,

nc=261,

)

device_numerical_accuracy_parameters = NumericalAccuracyParameters(

density_mesh_cutoff=100.0*Hartree,

k_point_sampling=device_k_point_sampling,

)

#----------------------------------------

# Contour Integral Settings

#----------------------------------------

equilibrium_contour = SemiCircleContour(

integral_lower_bound=1.84481605655*Hartree,

circle_points=30,

)

contour_parameters = ContourParameters(

equilibrium_contour=equilibrium_contour,

)

#----------------------------------------

# Device Calculator

#----------------------------------------

calculator = DeviceLCAOCalculator(

basis_set=basis_set,

numerical_accuracy_parameters=device_numerical_accuracy_parameters,

contour_parameters=contour_parameters,

)

device_configuration.setCalculator(calculator)

nlprint(device_configuration)

nlsave('Re-chem-Cu-ADS-Cu-t2-012-012.hdf5', device_configuration)

# -------------------------------------------------------------

# IV Characteristics

# -------------------------------------------------------------

# Kpoint sampling

kpoint_grid = MonkhorstPackGrid(

na=2,

)

# Gate-source voltages

gate_source_voltages = numpy.linspace(0, 0, 1)*Volt

# Drain-source voltages

drain_source_voltages = numpy.linspace(-0.12, 0.12, 3)*Volt

# File name.

filename = 'Re-chem-Cu-ADS-Cu-t2-012-012.hdf5'

iv_characteristics = IVCharacteristics(

configuration=device_configuration,

filename=filename,

object_id='ivcharacteristics',

gate_regions=[],

gate_source_voltages=gate_source_voltages,

drain_source_voltages=drain_source_voltages,

energies=None,

kpoints=kpoint_grid,

self_energy_calculator=RecursionSelfEnergy(),

energy_zero_parameter=AverageFermiLevel,

infinitesimal=1e-06*eV,

log_filename_prefix='ivcharacteristics_',

number_of_processes_per_task=None,

enforce_zero_transmission_in_band_gap=True,

)

iv_characteristics.update()

**chem-Cu-ADS-Cu-*t*2.py**

# -*- coding: utf-8 -*-

# -------------------------------------------------------------

# Two-probe Configuration

# -------------------------------------------------------------

# -------------------------------------------------------------

# Left Electrode

# -------------------------------------------------------------

# Set up lattice

vector_a = [25.0, 0.0, 0.0]*Angstrom

vector_b = [0.0, 15.0, 0.0]*Angstrom

vector_c = [0.0, 0.0, 3.61470032]*Angstrom

left_electrode_lattice = UnitCell(vector_a, vector_b, vector_c)

# Define elements

left_electrode_elements = [Copper, Copper, Copper, Copper, Copper, Copper, Copper, Copper,

Copper, Copper, Copper, Copper, Copper, Copper, Copper]

# Define coordinates

left_electrode_coordinates = [[ 10.6926496004 , 3.88530015845, 0.9035754 ],

[ 14.3073499204 , 3.88530015845, 0.9035754 ],

[ 12.4999997604 , 5.69265007845, 0.9035754 ],

[ 10.6926496004 , 7.50000023845, 0.9035754 ],

[ 14.3073499204 , 7.50000023845, 0.9035754 ],

[ 12.4999997604 , 9.30735039845, 0.9035754 ],

[ 10.6926496004 , 11.11470055845, 0.9035754 ],

[ 14.3073499204 , 11.11470055845, 0.9035754 ],

[ 12.4999997604 , 3.88530015845, 2.71092556 ],

[ 10.6926496004 , 5.69265007845, 2.71092556 ],

[ 14.3073499204 , 5.69265007845, 2.71092556 ],

[ 12.4999997604 , 7.50000023845, 2.71092556 ],

[ 10.6926496004 , 9.30735039845, 2.71092556 ],

[ 14.3073499204 , 9.30735039845, 2.71092556 ],

[ 12.4999997604 , 11.11470055845, 2.71092556 ]]*Angstrom

# Set up configuration

left_electrode = BulkConfiguration(

bravais_lattice=left_electrode_lattice,

elements=left_electrode_elements,

cartesian_coordinates=left_electrode_coordinates

)

# -------------------------------------------------------------

# Right Electrode

# -------------------------------------------------------------

# Set up lattice

vector_a = [25.0, 0.0, 0.0]*Angstrom

vector_b = [0.0, 15.0, 0.0]*Angstrom

vector_c = [0.0, 0.0, 3.6146965027]*Angstrom

right_electrode_lattice = UnitCell(vector_a, vector_b, vector_c)

# Define elements

right_electrode_elements = [Copper, Copper, Copper, Copper, Copper, Copper, Copper, Copper,

Copper, Copper, Copper, Copper, Copper, Copper, Copper]

# Define coordinates

right_electrode_coordinates = [[ 9.4739498413 , 5.016779881267, 0.9037728546 ],

[ 13.0886501587 , 5.016779881267, 0.9037728546 ],

[ 11.2813 , 6.824129801567, 0.9037728546 ],

[ 9.4739498413 , 8.631479960267, 0.9037728546 ],

[ 13.0886501587 , 8.631479960267, 0.9037728546 ],

[ 11.2813 , 10.438830118967, 0.9037728546 ],

[ 9.4739498413 , 12.246180277667, 0.9037728546 ],

[ 13.0886501587 , 12.246180277667, 0.9037728546 ],

[ 11.2813 , 5.016779881267, 2.7111230133 ],

[ 9.4739498413 , 6.824129801567, 2.7111230133 ],

[ 13.0886501587 , 6.824129801567, 2.7111230133 ],

[ 11.2813 , 8.631479960267, 2.7111230133 ],

[ 9.4739498413 , 10.438830118967, 2.7111230133 ],

[ 13.0886501587 , 10.438830118967, 2.7111230133 ],

[ 11.2813 , 12.246180277667, 2.7111230133 ]]*Angstrom

# Set up configuration

right_electrode = BulkConfiguration(

bravais_lattice=right_electrode_lattice,

elements=right_electrode_elements,

cartesian_coordinates=right_electrode_coordinates

)

# -------------------------------------------------------------

# Central Region

# -------------------------------------------------------------

# Set up lattice

vector_a = [25.0, 0.0, 0.0]*Angstrom

vector_b = [0.0, 15.0, 0.0]*Angstrom

vector_c = [0.0, 0.0, 30.167997226]*Angstrom

central_region_lattice = UnitCell(vector_a, vector_b, vector_c)

# Define elements

central_region_elements = [Copper, Copper, Copper, Copper, Copper, Copper, Copper, Copper,

Copper, Copper, Copper, Copper, Copper, Copper, Copper, Copper,

Copper, Copper, Copper, Copper, Copper, Copper, Copper, Copper,

Copper, Copper, Copper, Copper, Copper, Copper, Copper, Copper,

Copper, Copper, Copper, Copper, Copper, Copper, Copper, Copper,

Copper, Copper, Copper, Copper, Copper, Copper, Copper, Copper,

Copper, Copper, Copper, Copper, Copper, Copper, Copper, Copper,

Copper, Copper, Copper, Copper, Copper, Copper, Copper, Copper,

Copper, Copper, Copper, Copper, Copper, Copper, Copper, Copper,

Copper, Copper, Copper, Copper, Copper, Copper, Copper, Copper,

Copper, Copper, Copper, Copper, Copper, Copper, Copper, Copper,

Copper, Copper, Copper, Copper, Copper, Copper, Copper, Copper,

Copper, Copper, Copper, Copper, Copper, Copper, Copper, Copper,

Copper, Copper, Copper, Copper, Copper, Copper, Copper, Copper,

Copper, Copper, Copper, Copper, Copper, Copper, Copper, Copper,

Copper, Copper, Copper, Copper, Copper, Copper, Carbon, Carbon,

Carbon, Carbon, Carbon, Carbon, Carbon, Hydrogen, Carbon, Hydrogen,

Carbon, Hydrogen, Hydrogen, Carbon, Hydrogen, Carbon, Hydrogen,

Carbon, Selenium, Selenium, Carbon, Carbon, Carbon, Carbon, Carbon,

Carbon, Hydrogen, Hydrogen, Hydrogen, Hydrogen, Copper, Copper,

Copper, Copper, Copper, Copper, Copper, Copper, Copper, Copper,

Copper, Copper, Copper, Copper, Copper, Copper, Copper, Copper,

Copper, Copper, Copper, Copper, Copper, Copper, Copper, Copper,

Copper, Copper, Copper, Copper, Copper, Copper, Copper, Copper,

Copper, Copper, Copper, Copper, Copper, Copper, Copper, Copper]

# Define coordinates

central_region_coordinates = [[ 10.6926496004 , 3.88530015845 , 0.9035754 ],

[ 14.3073499204 , 3.88530015845 , 0.9035754 ],

[ 12.4999997604 , 5.69265007845 , 0.9035754 ],

[ 10.6926496004 , 7.50000023845 , 0.9035754 ],

[ 14.3073499204 , 7.50000023845 , 0.9035754 ],

[ 12.4999997604 , 9.30735039845 , 0.9035754 ],

[ 10.6926496004 , 11.11470055845 , 0.9035754 ],

[ 14.3073499204 , 11.11470055845 , 0.9035754 ],

[ 12.4999997604 , 3.88530015845 , 2.71092556 ],

[ 10.6926496004 , 5.69265007845 , 2.71092556 ],

[ 14.3073499204 , 5.69265007845 , 2.71092556 ],

[ 12.4999997604 , 7.50000023845 , 2.71092556 ],

[ 10.6926496004 , 9.30735039845 , 2.71092556 ],

[ 14.3073499204 , 9.30735039845 , 2.71092556 ],

[ 12.4999997604 , 11.11470055845 , 2.71092556 ],

[ 10.6926496004 , 3.88530015845 , 4.51827571 ],

[ 14.3073499204 , 3.88530015845 , 4.51827571 ],

[ 12.4999997604 , 5.69265007845 , 4.51827571 ],

[ 10.6926496004 , 7.50000023845 , 4.51827571 ],

[ 14.3073499204 , 7.50000023845 , 4.51827571 ],

[ 12.4999997604 , 9.30735039845 , 4.51827571 ],

[ 10.6926496004 , 11.11470055845 , 4.51827571 ],

[ 14.3073499204 , 11.11470055845 , 4.51827571 ],

[ 12.4999997604 , 3.88530015845 , 6.32562587 ],

[ 10.6926496004 , 5.69265007845 , 6.32562587 ],

[ 14.3073499204 , 5.69265007845 , 6.32562587 ],

[ 12.4999997604 , 7.50000023845 , 6.32562587 ],

[ 10.6926496004 , 9.30735039845 , 6.32562587 ],

[ 14.3073499204 , 9.30735039845 , 6.32562587 ],

[ 12.4999997604 , 11.11470055845 , 6.32562587 ],

[ 3.5799309611 , 11.55716919905 , 8.3275264587 ],

[ 15.0424889922 , 9.34946560865 , 8.3295253601 ],

[ 8.6729840636 , 11.56228852275 , 8.3295253601 ],

[ 11.2219085097 , 11.56317830085 , 8.3295253601 ],

[ 12.4971389175 , 9.34840607645 , 8.3305267181 ],

[ 6.1268658042 , 11.56008839615 , 8.3305267181 ],

[ 7.4030150771 , 9.34725880625 , 8.3315261688 ],

[ 2.3047119975 , 9.34911274915 , 8.3315261688 ],

[ 18.8709697127 , 11.55831837655 , 8.3315261688 ],

[ 13.7716493011 , 11.56228852275 , 8.3315261688 ],

[ 9.9510316253 , 4.93961262705 , 8.3325256195 ],

[ 4.8561820388 , 9.34734654425 , 8.3325256195 ],

[ 17.592489183 , 9.34955334665 , 8.3325256195 ],

[ 20.1437987685 , 9.35052514075 , 8.3325256195 ],

[ 16.3206691146 , 11.55911850935 , 8.3325256195 ],

[ 1.0331498981 , 11.55964875225 , 8.3325256195 ],

[ 9.9480122924 , 9.34611058235 , 8.3335269775 ],

[ 22.6923789382 , 4.93696475035 , 8.3345264282 ],

[ 4.8549208045 , 4.93731760985 , 8.3345264282 ],

[ 7.4022120833 , 4.93996596335 , 8.3345264282 ],

[ 3.5815238357 , 7.14255261425 , 8.3345264282 ],

[ 20.1435584426 , 4.93908381465 , 8.3355258789 ],

[ 17.5950984359 , 4.94058394435 , 8.3355258789 ],

[ 6.1295790076 , 7.14211153985 , 8.3355258789 ],

[ 18.8674086928 , 7.14202284815 , 8.3365253296 ],

[ 12.4989890456 , 4.94323277475 , 8.3375266876 ],

[ 15.0471991897 , 4.94393897055 , 8.3375266876 ],

[ 21.4148597121 , 7.14193463325 , 8.3375266876 ],

[ 8.6792153716 , 7.14105153085 , 8.339525589 ],

[ 11.2287492156 , 7.14193463325 , 8.339525589 ],

[ 16.3195590377 , 7.14069867135 , 8.3435252991 ],

[ 13.7724189162 , 7.14131665235 , 8.3445266571 ],

[ 9.9445418716 , 10.81861901285 , 10.3835281219 ],

[ 12.4942788482 , 10.82444882395 , 10.3865283813 ],

[ 7.3989838958 , 10.81438851355 , 10.3915275421 ],

[ 8.6754521728 , 4.19232296945 , 10.3925289001 ],

[ 15.0467690826 , 10.82656884195 , 10.3935283508 ],

[ 4.85342592 , 10.81367897995 , 10.3955272522 ],

[ 18.8749980331 , 8.61868405345 , 10.4005283203 ],

[ 17.6007880569 , 10.82532906535 , 10.4005283203 ],

[ 2.3080720305 , 10.81685853005 , 10.401527771 ],

[ 11.2252387404 , 4.20123887065 , 10.4035285797 ],

[ 16.3124694228 , 8.61912465095 , 10.4035285797 ],

[ 20.1508292556 , 10.82391858105 , 10.4035285797 ],

[ 3.5782069564 , 8.61162114145 , 10.4045280304 ],

[ 13.7743186355 , 4.20750689505 , 10.4065288391 ],

[ 22.6971186996 , 6.40797495845 , 10.4075282898 ],

[ 6.1288227439 , 4.20088553435 , 10.4085277405 ],

[ 23.9680690169 , 4.20097374915 , 10.4085277405 ],

[ 16.3220691085 , 4.20865464215 , 10.4085277405 ],

[ 21.4198493362 , 8.61426949505 , 10.4085277405 ],

[ 21.420368135 , 4.20397591595 , 10.4095290985 ],

[ 4.8575667739 , 6.40488457685 , 10.4125274506 ],

[ 6.1290659308 , 8.60738396645 , 10.4125274506 ],

[ 11.2245187163 , 8.61117959025 , 10.4125274506 ],

[ 13.7693585753 , 8.61524033545 , 10.4135288086 ],

[ 18.8718585372 , 4.20768380165 , 10.4145282593 ],

[ 8.6706475616 , 8.60508751875 , 10.4185279694 ],

[ 9.9620370269 , 6.40717959405 , 10.4205287781 ],

[ 7.4011368156 , 6.41044688225 , 10.4205287781 ],

[ 20.141158998 , 6.40656256675 , 10.4235290375 ],

[ 17.5994796157 , 6.40444350245 , 10.4285281982 ],

[ 15.0432690978 , 6.41159367565 , 10.4465278473 ],

[ 12.5025491118 , 6.41097664835 , 10.448528656 ],

[ 8.6872720122 , 5.64647078515 , 12.4315284576 ],

[ 17.5970286727 , 7.91191363335 , 12.434528717 ],

[ 12.503269136 , 3.43682169915 , 12.4465278473 ],

[ 13.7715491653 , 10.12773919105 , 12.447527298 ],

[ 15.0574387908 , 3.44732785225 , 12.448528656 ],

[ 11.2188491225 , 10.11361908915 , 12.4495281067 ],

[ 9.947875917 , 3.44538474085 , 12.4565280762 ],

[ 16.3248996139 , 10.11529850965 , 12.4595283356 ],

[ 8.6783398986 , 10.09710907935 , 12.4635280457 ],

[ 17.5960196853 , 3.46613073355 , 12.4665283051 ],

[ 7.4027771354 , 3.45624375345 , 12.4695285645 ],

[ 18.8733691573 , 10.10107827185 , 12.4715274658 ],

[ 6.1242699027 , 10.09066891675 , 12.4725288239 ],

[ 4.8411001563 , 7.87766051295 , 12.4795287933 ],

[ 9.9422063232 , 7.89178586005 , 12.4795287933 ],

[ 20.1558493972 , 3.46966171265 , 12.480528244 ],

[ 20.1448783279 , 7.89063763625 , 12.4815276947 ],

[ 3.5783550143 , 10.08351826675 , 12.4835285034 ],

[ 21.4328498244 , 5.67675185205 , 12.4845279541 ],

[ 1.0319309831 , 10.08924889565 , 12.4845279541 ],

[ 4.8559951186 , 3.46613073355 , 12.4865287628 ],

[ 2.3037478328 , 7.88110375405 , 12.4875282135 ],

[ 3.5876440406 , 5.67321991925 , 12.4885276642 ],

[ 22.6995696425 , 3.47213363655 , 12.4895290222 ],

[ 6.1311640143 , 5.66333270075 , 12.4895290222 ],

[ 11.2323693633 , 5.64161562925 , 12.4905284729 ],

[ 15.0495786071 , 7.92506670955 , 12.4905284729 ],

[ 16.3312396407 , 5.66633391385 , 12.4955276337 ],

[ 12.4942387939 , 7.92612671855 , 12.4975284424 ],

[ 7.3850778937 , 7.88640093805 , 12.5115283813 ],

[ 13.782109201 , 5.64143872265 , 12.5155280914 ],

[ 18.8853091598 , 5.66854071625 , 12.5215286102 ],

[ 12.9113587737 , 8.13729310035 , 14.6945289459 ],

[ 13.0834893584 , 5.30659270285 , 14.7055286255 ],

[ 14.2906188369 , 6.06438851355 , 14.7895282593 ],

[ 14.2116689086 , 7.51756691935 , 14.8045276489 ],

[ 11.7043790221 , 7.37817263605 , 14.8075279083 ],

[ 11.7805384994 , 5.92631888395 , 14.8165286865 ],

[ 15.5819491744 , 5.43795371055 , 14.8685287323 ],

[ 13.1451587081 , 4.23010659225 , 14.8795284119 ],

[ 10.417589128 , 8.00381302835 , 14.8825286713 ],

[ 12.8526391387 , 9.21148419385 , 14.8825286713 ],

[ 15.3983086944 , 8.28154206275 , 14.9235290375 ],

[ 15.6352185607 , 4.35131478315 , 14.9445289459 ],

[ 10.3650893569 , 9.09159970285 , 14.948528656 ],

[ 10.596439302 , 5.16322684295 , 14.9615272369 ],

[ 15.3206786513 , 9.36659169205 , 15.012527832 ],

[ 16.7231788039 , 6.23574090005 , 15.0285285797 ],

[ 10.6747292876 , 4.07702851295 , 15.0385288086 ],

[ 9.2784489989 , 7.20770382885 , 15.0655273285 ],

[ 18.5574797988 , 5.63216996195 , 15.0765289154 ],

[ 7.4520000815 , 7.82098460205 , 15.0765289154 ],

[ 16.6632880569 , 7.65307688715 , 15.0855277863 ],

[ 9.33115381 , 5.79116177565 , 15.1165279236 ],

[ 17.938159883 , 8.30096364025 , 15.2335285034 ],

[ 8.0496606231 , 5.14910197265 , 15.2535289612 ],

[ 6.9623531699 , 5.97760987285 , 15.2735275116 ],

[ 19.0282687545 , 7.47607493405 , 15.2755283203 ],

[ 18.033359468 , 9.38680768015 , 15.2845290985 ],

[ 7.9491547942 , 4.06396365165 , 15.3125289764 ],

[ 20.0781096816 , 7.74285674095 , 15.3655284729 ],

[ 5.9118980765 , 5.71859574325 , 15.3735278931 ],

[ 11.2813 , 8.631479960267, 18.4203265991 ],

[ 11.2813 , 6.824129801567, 20.2276767578 ],

[ 9.4739498413 , 8.631479960267, 20.2276767578 ],

[ 13.0886501587 , 8.631479960267, 20.2276767578 ],

[ 11.2813 , 10.438830118967, 20.2276767578 ],

[ 11.2813 , 5.016779881267, 22.0350269165 ],

[ 9.4739498413 , 6.824129801567, 22.0350269165 ],

[ 13.0886501587 , 6.824129801567, 22.0350269165 ],

[ 11.2813 , 8.631479960267, 22.0350269165 ],

[ 9.4739498413 , 10.438830118967, 22.0350269165 ],

[ 13.0886501587 , 10.438830118967, 22.0350269165 ],

[ 11.2813 , 12.246180277667, 22.0350269165 ],

[ 9.4739498413 , 5.016779881267, 23.8423770752 ],

[ 13.0886501587 , 5.016779881267, 23.8423770752 ],

[ 11.2813 , 6.824129801567, 23.8423770752 ],

[ 9.4739498413 , 8.631479960267, 23.8423770752 ],

[ 13.0886501587 , 8.631479960267, 23.8423770752 ],

[ 11.2813 , 10.438830118967, 23.8423770752 ],

[ 9.4739498413 , 12.246180277667, 23.8423770752 ],

[ 13.0886501587 , 12.246180277667, 23.8423770752 ],

[ 11.2813 , 5.016779881267, 25.6497272339 ],

[ 9.4739498413 , 6.824129801567, 25.6497272339 ],

[ 13.0886501587 , 6.824129801567, 25.6497272339 ],

[ 11.2813 , 8.631479960267, 25.6497272339 ],

[ 9.4739498413 , 10.438830118967, 25.6497272339 ],

[ 13.0886501587 , 10.438830118967, 25.6497272339 ],

[ 11.2813 , 12.246180277667, 25.6497272339 ],

[ 9.4739498413 , 5.016779881267, 27.4570773926 ],

[ 13.0886501587 , 5.016779881267, 27.4570773926 ],

[ 11.2813 , 6.824129801567, 27.4570773926 ],

[ 9.4739498413 , 8.631479960267, 27.4570773926 ],

[ 13.0886501587 , 8.631479960267, 27.4570773926 ],

[ 11.2813 , 10.438830118967, 27.4570773926 ],

[ 9.4739498413 , 12.246180277667, 27.4570773926 ],

[ 13.0886501587 , 12.246180277667, 27.4570773926 ],

[ 11.2813 , 5.016779881267, 29.2644275513 ],

[ 9.4739498413 , 6.824129801567, 29.2644275513 ],

[ 13.0886501587 , 6.824129801567, 29.2644275513 ],

[ 11.2813 , 8.631479960267, 29.2644275513 ],

[ 9.4739498413 , 10.438830118967, 29.2644275513 ],

[ 13.0886501587 , 10.438830118967, 29.2644275513 ],

[ 11.2813 , 12.246180277667, 29.2644275513 ]]*Angstrom

# Set up configuration

central_region = BulkConfiguration(

bravais_lattice=central_region_lattice,

elements=central_region_elements,

cartesian_coordinates=central_region_coordinates

)

device_configuration = DeviceConfiguration(

central_region,

[left_electrode, right_electrode],

equivalent_electrode_lengths=[7.22940064, 7.2293930054]*Angstrom,

transverse_electrode_repetitions=[[1, 1], [1, 1]],

)

# -------------------------------------------------------------

# Calculator

# -------------------------------------------------------------

#----------------------------------------

# Basis Set

#----------------------------------------

basis_set = [

GGABasis.Hydrogen_DoubleZetaPolarized,

GGABasis.Carbon_DoubleZetaPolarized,

GGABasis.Copper_DoubleZetaPolarized,

GGABasis.Selenium_DoubleZetaPolarized,

]

#----------------------------------------

# Numerical Accuracy Settings

#----------------------------------------

device_k_point_sampling = MonkhorstPackGrid(

na=2,

nc=261,

)

device_numerical_accuracy_parameters = NumericalAccuracyParameters(

density_mesh_cutoff=100.0*Hartree,

k_point_sampling=device_k_point_sampling,

)

#----------------------------------------

# Contour Integral Settings

#----------------------------------------

equilibrium_contour = SemiCircleContour(

integral_lower_bound=1.84481605655*Hartree,

circle_points=30,

)

contour_parameters = ContourParameters(

equilibrium_contour=equilibrium_contour,

)

#----------------------------------------

# Device Calculator

#----------------------------------------

calculator = DeviceLCAOCalculator(

basis_set=basis_set,

numerical_accuracy_parameters=device_numerical_accuracy_parameters,

contour_parameters=contour_parameters,

)

device_configuration.setCalculator(calculator)

nlprint(device_configuration)

nlsave('chem-Cu-ADS-Cu-t2-012-012.hdf5', device_configuration)

# -------------------------------------------------------------

# IV Characteristics

# -------------------------------------------------------------

# Kpoint sampling

kpoint_grid = KpointDensity(

density_a=7.0*Angstrom,

density_b=2.38732414638*Angstrom,

density_c=0.0*Angstrom,

)

# Gate-source voltages

gate_source_voltages = numpy.linspace(0, 0, 1)*Volt

# Drain-source voltages

drain_source_voltages = numpy.linspace(-0.12, 0.12, 3)*Volt

# File name.

filename = 'chem-Cu-ADS-Cu-t2-012-012.hdf5'

iv_characteristics = IVCharacteristics(

configuration=device_configuration,

filename=filename,

object_id='ivcharacteristics',

gate_regions=[],

gate_source_voltages=gate_source_voltages,

drain_source_voltages=drain_source_voltages,

energies=None,

kpoints=kpoint_grid,

self_energy_calculator=RecursionSelfEnergy(),

energy_zero_parameter=AverageFermiLevel,

infinitesimal=1e-06*eV,

log_filename_prefix='ivcharacteristics_',

number_of_processes_per_task=None,

enforce_zero_transmission_in_band_gap=True,

)

iv_characteristics.update()

**phys-Cu-ADS-Cu-*t*3.py**

# -*- coding: utf-8 -*-

# -------------------------------------------------------------

# Two-probe Configuration

# -------------------------------------------------------------

# -------------------------------------------------------------

# Left Electrode

# -------------------------------------------------------------

# Set up lattice

vector_a = [25.0, 0.0, 0.0]*Angstrom

vector_b = [0.0, 15.0, 0.0]*Angstrom

vector_c = [0.0, 0.0, 3.61470032]*Angstrom

left_electrode_lattice = UnitCell(vector_a, vector_b, vector_c)

# Define elements

left_electrode_elements = [Copper, Copper, Copper, Copper, Copper, Copper, Copper, Copper,

Copper, Copper, Copper, Copper, Copper, Copper, Copper]

# Define coordinates

left_electrode_coordinates = [[ 10.6926501976, 3.8852998008, 0.9035754 ],

[ 14.3073505176, 3.8852998008, 0.9035754 ],

[ 12.5000003576, 5.6926497208, 0.9035754 ],

[ 10.6926501976, 7.4999998808, 0.9035754 ],

[ 14.3073505176, 7.4999998808, 0.9035754 ],

[ 12.5000003576, 9.3073500408, 0.9035754 ],

[ 10.6926501976, 11.1147002008, 0.9035754 ],

[ 14.3073505176, 11.1147002008, 0.9035754 ],

[ 12.5000003576, 3.8852998008, 2.71092556 ],

[ 10.6926501976, 5.6926497208, 2.71092556 ],

[ 14.3073505176, 5.6926497208, 2.71092556 ],

[ 12.5000003576, 7.4999998808, 2.71092556 ],

[ 10.6926501976, 9.3073500408, 2.71092556 ],

[ 14.3073505176, 9.3073500408, 2.71092556 ],

[ 12.5000003576, 11.1147002008, 2.71092556 ]]*Angstrom

# Set up configuration

left_electrode = BulkConfiguration(

bravais_lattice=left_electrode_lattice,

elements=left_electrode_elements,

cartesian_coordinates=left_electrode_coordinates

)

# -------------------------------------------------------------

# Right Electrode

# -------------------------------------------------------------

# Set up lattice

vector_a = [25.0, 0.0, 0.0]*Angstrom

vector_b = [0.0, 15.0, 0.0]*Angstrom

vector_c = [0.0, 0.0, 3.6146965027]*Angstrom

right_electrode_lattice = UnitCell(vector_a, vector_b, vector_c)

# Define elements

right_electrode_elements = [Copper, Copper, Copper, Copper, Copper, Copper, Copper, Copper,

Copper, Copper, Copper, Copper, Copper, Copper, Copper]

# Define coordinates

right_electrode_coordinates = [[ 9.4424498413 , 3.563869881267, 0.9037728546 ],

[ 13.0571501587 , 3.563869881267, 0.9037728546 ],

[ 11.2498 , 5.371219801567, 0.9037728546 ],

[ 9.4424498413 , 7.178569960267, 0.9037728546 ],

[ 13.0571501587 , 7.178569960267, 0.9037728546 ],

[ 11.2498 , 8.985920118967, 0.9037728546 ],

[ 9.4424498413 , 10.793270277667, 0.9037728546 ],

[ 13.0571501587 , 10.793270277667, 0.9037728546 ],

[ 11.2498 , 3.563869881267, 2.7111230133 ],

[ 9.4424498413 , 5.371219801567, 2.7111230133 ],

[ 13.0571501587 , 5.371219801567, 2.7111230133 ],

[ 11.2498 , 7.178569960267, 2.7111230133 ],

[ 9.4424498413 , 8.985920118967, 2.7111230133 ],

[ 13.0571501587 , 8.985920118967, 2.7111230133 ],

[ 11.2498 , 10.793270277667, 2.7111230133 ]]*Angstrom

# Set up configuration

right_electrode = BulkConfiguration(

bravais_lattice=right_electrode_lattice,

elements=right_electrode_elements,

cartesian_coordinates=right_electrode_coordinates

)

# -------------------------------------------------------------

# Central Region

# -------------------------------------------------------------

# Set up lattice

vector_a = [25.0, 0.0, 0.0]*Angstrom

vector_b = [0.0, 15.0, 0.0]*Angstrom

vector_c = [0.0, 0.0, 30.167997226]*Angstrom

central_region_lattice = UnitCell(vector_a, vector_b, vector_c)

# Define elements

central_region_elements = [Copper, Copper, Copper, Copper, Copper, Copper, Copper, Copper,

Copper, Copper, Copper, Copper, Copper, Copper, Copper, Copper,

Copper, Copper, Copper, Copper, Copper, Copper, Copper, Copper,

Copper, Copper, Copper, Copper, Copper, Copper, Copper, Copper,

Copper, Copper, Copper, Copper, Copper, Copper, Copper, Copper,

Copper, Copper, Copper, Copper, Copper, Copper, Copper, Copper,

Copper, Copper, Copper, Copper, Copper, Copper, Copper, Copper,

Copper, Copper, Copper, Copper, Copper, Copper, Copper, Copper,

Copper, Copper, Copper, Copper, Copper, Copper, Copper, Copper,

Copper, Copper, Copper, Copper, Copper, Copper, Copper, Copper,

Copper, Copper, Copper, Copper, Copper, Copper, Copper, Copper,

Copper, Copper, Copper, Copper, Copper, Copper, Copper, Copper,

Copper, Copper, Copper, Copper, Copper, Copper, Copper, Copper,

Copper, Copper, Copper, Copper, Copper, Copper, Copper, Copper,

Copper, Copper, Copper, Copper, Copper, Copper, Copper, Copper,

Copper, Copper, Copper, Copper, Copper, Copper, Hydrogen, Hydrogen,

Hydrogen, Hydrogen, Carbon, Carbon, Hydrogen, Selenium, Hydrogen,

Carbon, Selenium, Hydrogen, Carbon, Hydrogen, Hydrogen, Carbon,

Hydrogen, Carbon, Carbon, Carbon, Carbon, Carbon, Carbon, Carbon,

Carbon, Carbon, Carbon, Carbon, Carbon, Carbon, Copper, Copper,

Copper, Copper, Copper, Copper, Copper, Copper, Copper, Copper,

Copper, Copper, Copper, Copper, Copper, Copper, Copper, Copper,

Copper, Copper, Copper, Copper, Copper, Copper, Copper, Copper,

Copper, Copper, Copper, Copper, Copper, Copper, Copper, Copper,

Copper, Copper, Copper, Copper, Copper, Copper, Copper, Copper]

# Define coordinates

central_region_coordinates = [[ 10.6926501976 , 3.8852998008 , 0.9035754 ],

[ 14.3073505176 , 3.8852998008 , 0.9035754 ],

[ 12.5000003576 , 5.6926497208 , 0.9035754 ],

[ 10.6926501976 , 7.4999998808 , 0.9035754 ],

[ 14.3073505176 , 7.4999998808 , 0.9035754 ],

[ 12.5000003576 , 9.3073500408 , 0.9035754 ],

[ 10.6926501976 , 11.1147002008 , 0.9035754 ],

[ 14.3073505176 , 11.1147002008 , 0.9035754 ],

[ 12.5000003576 , 3.8852998008 , 2.71092556 ],

[ 10.6926501976 , 5.6926497208 , 2.71092556 ],

[ 14.3073505176 , 5.6926497208 , 2.71092556 ],

[ 12.5000003576 , 7.4999998808 , 2.71092556 ],

[ 10.6926501976 , 9.3073500408 , 2.71092556 ],

[ 14.3073505176 , 9.3073500408 , 2.71092556 ],

[ 12.5000003576 , 11.1147002008 , 2.71092556 ],

[ 10.6926501976 , 3.8852998008 , 4.51827571 ],

[ 14.3073505176 , 3.8852998008 , 4.51827571 ],

[ 12.5000003576 , 5.6926497208 , 4.51827571 ],

[ 10.6926501976 , 7.4999998808 , 4.51827571 ],

[ 14.3073505176 , 7.4999998808 , 4.51827571 ],

[ 12.5000003576 , 9.3073500408 , 4.51827571 ],

[ 10.6926501976 , 11.1147002008 , 4.51827571 ],

[ 14.3073505176 , 11.1147002008 , 4.51827571 ],

[ 12.5000003576 , 3.8852998008 , 6.32562587 ],

[ 10.6926501976 , 5.6926497208 , 6.32562587 ],

[ 14.3073505176 , 5.6926497208 , 6.32562587 ],

[ 12.5000003576 , 7.4999998808 , 6.32562587 ],

[ 10.6926501976 , 9.3073500408 , 6.32562587 ],

[ 14.3073505176 , 9.3073500408 , 6.32562587 ],

[ 12.5000003576 , 11.1147002008 , 6.32562587 ],

[ 17.5967715978 , 9.3386067152 , 8.3295234528 ],

[ 12.4982122183 , 9.338783145 , 8.3295234528 ],

[ 15.0474427938 , 9.338783145 , 8.3295234528 ],

[ 7.4022172689 , 4.92195642 , 8.3305248108 ],

[ 8.6758559942 , 7.1302813292 , 8.3305248108 ],

[ 16.3218616247 , 7.1303704977 , 8.3305248108 ],

[ 11.2250322103 , 7.1307233572 , 8.3305248108 ],

[ 13.7725824117 , 7.1308115721 , 8.3305248108 ],

[ 7.4001153707 , 9.337459445 , 8.3305248108 ],

[ 9.9483741522 , 9.3377236128 , 8.3305248108 ],

[ 9.9506295919 , 4.9216035605 , 8.3315242615 ],

[ 18.8701728582 , 7.1298402548 , 8.3315242615 ],

[ 6.1271384954 , 7.1308115721 , 8.3315242615 ],

[ 2.3052273988 , 9.3372820616 , 8.3315242615 ],

[ 20.1456416845 , 9.3378123045 , 8.3315242615 ],

[ 12.4977124929 , 4.9221333265 , 8.3325237122 ],

[ 15.0472024679 , 4.923104167 , 8.3325237122 ],

[ 17.5956119299 , 4.9234575033 , 8.3325237122 ],

[ 1.0317283869 , 11.5441082716 , 8.3325237122 ],

[ 4.8536013365 , 4.9226626158 , 8.3335250702 ],

[ 4.8526204824 , 9.3372820616 , 8.3335250702 ],

[ 18.8703616857 , 11.5448979139 , 8.3335250702 ],

[ 16.3215926885 , 11.5455187559 , 8.3335250702 ],

[ 22.6925929784 , 4.9235452414 , 8.3345245209 ],

[ 3.5791333914 , 7.1301053763 , 8.3345245209 ],

[ 8.6743663549 , 11.5436686277 , 8.3345245209 ],

[ 11.2236922979 , 11.5448979139 , 8.3345245209 ],

[ 20.1432632208 , 4.9233692885 , 8.3355239716 ],

[ 3.5811084509 , 11.5424288511 , 8.3355239716 ],

[ 6.1270755529 , 11.5431383848 , 8.3355239716 ],

[ 13.7718518972 , 11.5467585325 , 8.3355239716 ],

[ 21.4163917303 , 7.1290453673 , 8.3365234222 ],

[ 16.3254722357 , 8.6050871611 , 10.3975204315 ],

[ 7.4034365415 , 6.3877586126 , 10.3985198822 ],

[ 18.8768924474 , 8.6034106016 , 10.3985198822 ],

[ 13.7747119665 , 8.6052645445 , 10.3985198822 ],

[ 9.9537853002 , 6.3889945746 , 10.3995193329 ],

[ 11.2250322103 , 8.6035870314 , 10.3995193329 ],

[ 8.6741193533 , 8.6019095183 , 10.4005206909 ],

[ 15.0479120016 , 6.3922604323 , 10.4025195923 ],

[ 12.5008720159 , 6.3902305365 , 10.4035209503 ],

[ 4.8547695875 , 6.3913773298 , 10.4055198517 ],

[ 17.5979522466 , 6.3919075728 , 10.4055198517 ],

[ 6.124993205 , 8.6024397612 , 10.4055198517 ],

[ 8.6783117056 , 4.1820815802 , 10.4065193024 ],

[ 21.4235728979 , 8.6018217802 , 10.4065193024 ],

[ 17.5978416204 , 10.8099688292 , 10.4065193024 ],

[ 15.0470327139 , 10.8105887175 , 10.4065193024 ],

[ 6.1300524473 , 4.1825236082 , 10.4075206604 ],

[ 13.77498281 , 4.1855243445 , 10.4075206604 ],

[ 9.9520400762 , 10.808118701 , 10.4075206604 ],

[ 20.1480315923 , 10.8086479902 , 10.4075206604 ],

[ 16.3233932256 , 4.1862305403 , 10.4085201111 ],

[ 3.5769883394 , 8.6006735563 , 10.4085201111 ],

[ 2.3083823919 , 10.8060883284 , 10.4085201111 ],

[ 12.4992822408 , 10.8076781035 , 10.4085201111 ],

[ 11.226362586 , 4.1837595701 , 10.4095195618 ],

[ 23.9682716131 , 4.1861423254 , 10.4105209198 ],

[ 21.4196132421 , 4.1876434088 , 10.4105209198 ],

[ 22.6926330328 , 6.3927901983 , 10.4115203705 ],

[ 7.401640296 , 10.8059080839 , 10.4115203705 ],

[ 18.8695625066 , 4.1894096136 , 10.4155200806 ],

[ 20.1413730383 , 6.3917301893 , 10.4155200806 ],

[ 4.8580693006 , 10.8042286635 , 10.4165195312 ],

[ 17.6028426885 , 7.8792494536 , 12.4435199585 ],

[ 7.4003232717 , 7.8543542624 , 12.4455207672 ],

[ 15.0510619878 , 7.8713043928 , 12.4475196686 ],

[ 9.9517930746 , 7.8621233702 , 12.4485210266 ],

[ 12.5014823675 , 7.8676842451 , 12.4485210266 ],

[ 8.68472898 , 5.6544164419 , 12.4695209351 ],

[ 16.3181327581 , 10.0786579847 , 12.4715198364 ],

[ 16.315292716 , 5.6593593359 , 12.4725192871 ],

[ 4.850279212 , 7.8617705107 , 12.4725192871 ],

[ 20.1516631841 , 7.8707741499 , 12.4725192871 ],

[ 6.1308635473 , 5.6543272734 , 12.4735206451 ],

[ 8.6862453222 , 10.0728281736 , 12.4745200958 ],

[ 18.8722518682 , 10.0786579847 , 12.4745200958 ],
[truncated: 1,394,779 more chars]
